# Supplementary material for: Gene Ontology and KEGG Enrichment Analyses of Genes Related to Age-Related Macular Degeneration
Source: Hindawi journal article supplement (doi:10.1155/2014/450386), 2014-01-01
Supplement: f1 [file 450386.f1.zip]

**Supplementary Material I.** 39 known AMD related genes, termed as ‘positive genes’, and 1,950 randomly selected genes from Ensemble, termed as ‘negative genes’.

(1) Positive genes

|                 |                 |                 |
|-----------------|-----------------|-----------------|
| ENSP00000200676 | ENSP00000221132 | ENSP00000243222 |
| ENSP00000245907 | ENSP00000252486 | ENSP00000261037 |
| ENSP00000266085 | ENSP00000271588 | ENSP00000296795 |
| ENSP00000299022 | ENSP00000299367 | ENSP00000314299 |
| ENSP00000321735 | ENSP00000343002 | ENSP00000345008 |
| ENSP00000346560 | ENSP00000348089 | ENSP00000356395 |
| ENSP00000356399 | ENSP00000357980 | ENSP00000361125 |
| ENSP00000363089 | ENSP00000364133 | ENSP00000364660 |
| ENSP00000372853 | ENSP00000378130 | ENSP00000392835 |
| ENSP00000395405 | ENSP00000397956 | ENSP00000398139 |
| ENSP00000401397 | ENSP00000402278 | ENSP00000405800 |
| ENSP00000406091 | ENSP00000407961 | ENSP00000410815 |
| ENSP00000412283 | ENSP00000416561 | ENSP00000418735 |

(2) Negative genes

|                  |                  |                  |
|------------------|------------------|------------------|
| ENSP00000005284  | ENSP00000006015  | ENSP00000006526  |
| ENSP00000007722  | ENSP00000013034  | ENSP00000028008  |
| ENSP000000053468 | ENSP000000075503 | ENSP000000085068 |
| ENSP00000155926  | ENSP00000156825  | ENSP00000159087  |
| ENSP00000159111  | ENSP00000164227  | ENSP00000164640  |
| ENSP00000171111  | ENSP00000171757  | ENSP00000172229  |
| ENSP00000173229  | ENSP00000173898  | ENSP00000175091  |
| ENSP00000176183  | ENSP00000177694  | ENSP00000181839  |
| ENSP00000183605  | ENSP00000188790  | ENSP00000192314  |
| ENSP00000194871  | ENSP00000196489  | ENSP00000196548  |
| ENSP00000198765  | ENSP00000201031  | ENSP00000201979  |
| ENSP00000202017  | ENSP00000202788  | ENSP00000203629  |
| ENSP00000204549  | ENSP00000204961  | ENSP00000205061  |
| ENSP00000205143  | ENSP00000205194  | ENSP00000205214  |
| ENSP00000207549  | ENSP00000215587  | ENSP00000215727  |
| ENSP00000215862  | ENSP00000215939  | ENSP00000216044  |
| ENSP00000216133  | ENSP00000216200  | ENSP00000216338  |
| ENSP00000216463  | ENSP00000216520  | ENSP00000216639  |
| ENSP00000216797  | ENSP00000216911  | ENSP00000217188  |
| ENSP00000217372  | ENSP00000217652  | ENSP00000217901  |
| ENSP00000218006  | ENSP00000218197  | ENSP00000218432  |
| ENSP00000218721  | ENSP00000219070  | ENSP00000219150  |
| ENSP00000219169  | ENSP00000219406  | ENSP00000219481  |
| ENSP00000220507  | ENSP00000220584  | ENSP00000220616  |

|                 |                 |                 |
|-----------------|-----------------|-----------------|
| ENSP00000220931 | ENSP00000221452 | ENSP00000221466 |
| ENSP00000221856 | ENSP00000221859 | ENSP00000221891 |
| ENSP00000221996 | ENSP00000222120 | ENSP00000222254 |
| ENSP00000222284 | ENSP00000222482 | ENSP00000222598 |
| ENSP00000222728 | ENSP00000222823 | ENSP00000223190 |
| ENSP00000223368 | ENSP00000223428 | ENSP00000223795 |
| ENSP00000224600 | ENSP00000225328 | ENSP00000225519 |
| ENSP00000225525 | ENSP00000225603 | ENSP00000225729 |
| ENSP00000225737 | ENSP00000225873 | ENSP00000225941 |
| ENSP00000225972 | ENSP00000226091 | ENSP00000226230 |
| ENSP00000226522 | ENSP00000226840 | ENSP00000227135 |
| ENSP00000227378 | ENSP00000227638 | ENSP00000227918 |
| ENSP00000228245 | ENSP00000228284 | ENSP00000228850 |
| ENSP00000229416 | ENSP00000229769 | ENSP00000229829 |
| ENSP00000230056 | ENSP00000230256 | ENSP00000230510 |
| ENSP00000230640 | ENSP00000231004 | ENSP00000231228 |
| ENSP00000231751 | ENSP00000231790 | ENSP00000232375 |
| ENSP00000232424 | ENSP00000233114 | ENSP00000233190 |
| ENSP00000233379 | ENSP00000233468 | ENSP00000233545 |
| ENSP00000233630 | ENSP00000233809 | ENSP00000233826 |
| ENSP00000234420 | ENSP00000234454 | ENSP00000235310 |
| ENSP00000236130 | ENSP00000236273 | ENSP00000237186 |
| ENSP00000237696 | ENSP00000238081 | ENSP00000238256 |
| ENSP00000238341 | ENSP00000238651 | ENSP00000239032 |
| ENSP00000239223 | ENSP00000239243 | ENSP00000239830 |
| ENSP00000239891 | ENSP00000239906 | ENSP00000240159 |
| ENSP00000240304 | ENSP00000240335 | ENSP00000240652 |
| ENSP00000241051 | ENSP00000241312 | ENSP00000241436 |
| ENSP00000242159 | ENSP00000242776 | ENSP00000243077 |
| ENSP00000243673 | ENSP00000243776 | ENSP00000243911 |
| ENSP00000243918 | ENSP00000244007 | ENSP00000244096 |
| ENSP00000244221 | ENSP00000244333 | ENSP00000244534 |
| ENSP00000244728 | ENSP00000244745 | ENSP00000244799 |
| ENSP00000245222 | ENSP00000245312 | ENSP00000245541 |
| ENSP00000245912 | ENSP00000246000 | ENSP00000246090 |
| ENSP00000246166 | ENSP00000246533 | ENSP00000246912 |
| ENSP00000247020 | ENSP00000247087 | ENSP00000247933 |
| ENSP00000247986 | ENSP00000248072 | ENSP00000248089 |
| ENSP00000248150 | ENSP00000248846 | ENSP00000248984 |
| ENSP00000249344 | ENSP00000249636 | ENSP00000249822 |
| ENSP00000250066 | ENSP00000250151 | ENSP00000250156 |
| ENSP00000250244 | ENSP00000250495 | ENSP00000250823 |
| ENSP00000251343 | ENSP00000251535 | ENSP00000251588 |
| ENSP00000251808 | ENSP00000251973 | ENSP00000252087 |

|                 |                 |                 |
|-----------------|-----------------|-----------------|
| ENSP00000252137 | ENSP00000252268 | ENSP00000252599 |
| ENSP00000252603 | ENSP00000252655 | ENSP00000252675 |
| ENSP00000252816 | ENSP00000252891 | ENSP00000252898 |
| ENSP00000252996 | ENSP00000253054 | ENSP00000253099 |
| ENSP00000253335 | ENSP00000253354 | ENSP00000253457 |
| ENSP00000253934 | ENSP00000254035 | ENSP00000254101 |
| ENSP00000254227 | ENSP00000254323 | ENSP00000254605 |
| ENSP00000254719 | ENSP00000254765 | ENSP00000254816 |
| ENSP00000254928 | ENSP00000254998 | ENSP00000255078 |
| ENSP00000255082 | ENSP00000255129 | ENSP00000255262 |
| ENSP00000255380 | ENSP00000255409 | ENSP00000255531 |
| ENSP00000255559 | ENSP00000255688 | ENSP00000256151 |
| ENSP00000256178 | ENSP00000256196 | ENSP00000256216 |
| ENSP00000256367 | ENSP00000256398 | ENSP00000256441 |
| ENSP00000256442 | ENSP00000256447 | ENSP00000256458 |
| ENSP00000256474 | ENSP00000256592 | ENSP00000256785 |
| ENSP00000256797 | ENSP00000256861 | ENSP00000257034 |
| ENSP00000257248 | ENSP00000257572 | ENSP00000257626 |
| ENSP00000257765 | ENSP00000257879 | ENSP00000257974 |
| ENSP00000258062 | ENSP00000258145 | ENSP00000258214 |
| ENSP00000258385 | ENSP00000258390 | ENSP00000258436 |
| ENSP00000258443 | ENSP00000258457 | ENSP00000258526 |
| ENSP00000258530 | ENSP00000258739 | ENSP00000258930 |
| ENSP00000258969 | ENSP00000259008 | ENSP00000259154 |
| ENSP00000259206 | ENSP00000259211 | ENSP00000259213 |
| ENSP00000259365 | ENSP00000259569 | ENSP00000259698 |
| ENSP00000259727 | ENSP00000259750 | ENSP00000259895 |
| ENSP00000260049 | ENSP00000260128 | ENSP00000260129 |
| ENSP00000260130 | ENSP00000260184 | ENSP00000260364 |
| ENSP00000260403 | ENSP00000260447 | ENSP00000260723 |
| ENSP00000260731 | ENSP00000260795 | ENSP00000260818 |
| ENSP00000261017 | ENSP00000261023 | ENSP00000261206 |
| ENSP00000261233 | ENSP00000261247 | ENSP00000261349 |
| ENSP00000261396 | ENSP00000261435 | ENSP00000261458 |
| ENSP00000261590 | ENSP00000261623 | ENSP00000261681 |
| ENSP00000261712 | ENSP00000261713 | ENSP00000261716 |
| ENSP00000261739 | ENSP00000261745 | ENSP00000261778 |
| ENSP00000261799 | ENSP00000261826 | ENSP00000261973 |
| ENSP00000261991 | ENSP00000262053 | ENSP00000262055 |
| ENSP00000262133 | ENSP00000262144 | ENSP00000262238 |
| ENSP00000262300 | ENSP00000262302 | ENSP00000262315 |
| ENSP00000262319 | ENSP00000262383 | ENSP00000262395 |
| ENSP00000262502 | ENSP00000262510 | ENSP00000262519 |
| ENSP00000262633 | ENSP00000262659 | ENSP00000262738 |

|                 |                 |                 |
|-----------------|-----------------|-----------------|
| ENSP00000262820 | ENSP00000262839 | ENSP00000262861 |
| ENSP00000262887 | ENSP00000262919 | ENSP00000263083 |
| ENSP00000263093 | ENSP00000263257 | ENSP00000263273 |
| ENSP00000263331 | ENSP00000263346 | ENSP00000263377 |
| ENSP00000263401 | ENSP00000263437 | ENSP00000263461 |
| ENSP00000263498 | ENSP00000263576 | ENSP00000263577 |
| ENSP00000263579 | ENSP00000263620 | ENSP00000263657 |
| ENSP00000263773 | ENSP00000263795 | ENSP00000263800 |
| ENSP00000263921 | ENSP00000263934 | ENSP00000263985 |
| ENSP00000264005 | ENSP00000264029 | ENSP00000264144 |
| ENSP00000264218 | ENSP00000264234 | ENSP00000264245 |
| ENSP00000264313 | ENSP00000264344 | ENSP00000264363 |
| ENSP00000264399 | ENSP00000264409 | ENSP00000264499 |
| ENSP00000264597 | ENSP00000264668 | ENSP00000264748 |
| ENSP00000264784 | ENSP00000264834 | ENSP00000264893 |
| ENSP00000264926 | ENSP00000264972 | ENSP00000264995 |
| ENSP00000264998 | ENSP00000265007 | ENSP00000265029 |
| ENSP00000265056 | ENSP00000265071 | ENSP00000265073 |
| ENSP00000265093 | ENSP00000265150 | ENSP00000265162 |
| ENSP00000265260 | ENSP00000265294 | ENSP00000265299 |
| ENSP00000265310 | ENSP00000265334 | ENSP00000265382 |
| ENSP00000265395 | ENSP00000265428 | ENSP00000265440 |
| ENSP00000265627 | ENSP00000265634 | ENSP00000265689 |
| ENSP00000265717 | ENSP00000265723 | ENSP00000265742 |
| ENSP00000265773 | ENSP00000265800 | ENSP00000265801 |
| ENSP00000265814 | ENSP00000265840 | ENSP00000265849 |
| ENSP00000265960 | ENSP00000266079 | ENSP00000266524 |
| ENSP00000266682 | ENSP00000267102 | ENSP00000267415 |
| ENSP00000267422 | ENSP00000267430 | ENSP00000267803 |
| ENSP00000267938 | ENSP00000267973 | ENSP00000268043 |
| ENSP00000268281 | ENSP00000268482 | ENSP00000268595 |
| ENSP00000268607 | ENSP00000268613 | ENSP00000268695 |
| ENSP00000268763 | ENSP00000268981 | ENSP00000269122 |
| ENSP00000269141 | ENSP00000269221 | ENSP00000269878 |
| ENSP00000270538 | ENSP00000270570 | ENSP00000271532 |
| ENSP00000271732 | ENSP00000272065 | ENSP00000272102 |
| ENSP00000272133 | ENSP00000272164 | ENSP00000272342 |
| ENSP00000272427 | ENSP00000272647 | ENSP00000273077 |
| ENSP00000273130 | ENSP00000273308 | ENSP00000273317 |
| ENSP00000273375 | ENSP00000273905 | ENSP00000273986 |
| ENSP00000274008 | ENSP00000274026 | ENSP00000274137 |
| ENSP00000274181 | ENSP00000274345 | ENSP00000274487 |
| ENSP00000274496 | ENSP00000274498 | ENSP00000274625 |
| ENSP00000274711 | ENSP00000274712 | ENSP00000274764 |

|                 |                 |                 |
|-----------------|-----------------|-----------------|
| ENSP00000275300 | ENSP00000275493 | ENSP00000275605 |
| ENSP00000275874 | ENSP00000276110 | ENSP00000276218 |
| ENSP00000276373 | ENSP00000276390 | ENSP00000276594 |
| ENSP00000276603 | ENSP00000276816 | ENSP00000276914 |
| ENSP00000276943 | ENSP00000277458 | ENSP00000277575 |
| ENSP00000278207 | ENSP00000278360 | ENSP00000278559 |
| ENSP00000278612 | ENSP00000278836 | ENSP00000278865 |
| ENSP00000278937 | ENSP00000279022 | ENSP00000279178 |
| ENSP00000279230 | ENSP00000279441 | ENSP00000280155 |
| ENSP00000280606 | ENSP00000280614 | ENSP00000281141 |
| ENSP00000281156 | ENSP00000281171 | ENSP00000281474 |
| ENSP00000282030 | ENSP00000282223 | ENSP00000282391 |
| ENSP00000282516 | ENSP00000282549 | ENSP00000282606 |
| ENSP00000283256 | ENSP00000283303 | ENSP00000283645 |
| ENSP00000283752 | ENSP00000283916 | ENSP00000284031 |
| ENSP00000284259 | ENSP00000284425 | ENSP00000284669 |
| ENSP00000284719 | ENSP00000284885 | ENSP00000285208 |
| ENSP00000285311 | ENSP00000285402 | ENSP00000285419 |
| ENSP00000285735 | ENSP00000285805 | ENSP00000286031 |
| ENSP00000286190 | ENSP00000286614 | ENSP00000287038 |
| ENSP00000287380 | ENSP00000287437 | ENSP00000287667 |
| ENSP00000287907 | ENSP00000288139 | ENSP00000289272 |
| ENSP00000289805 | ENSP00000289893 | ENSP00000290075 |
| ENSP00000290401 | ENSP00000290552 | ENSP00000290795 |
| ENSP00000290866 | ENSP00000291182 | ENSP00000291560 |
| ENSP00000291592 | ENSP00000291700 | ENSP00000291759 |
| ENSP00000292180 | ENSP00000292301 | ENSP00000292363 |
| ENSP00000292433 | ENSP00000292778 | ENSP00000292896 |
| ENSP00000293405 | ENSP00000293745 | ENSP00000293826 |
| ENSP00000293883 | ENSP00000294119 | ENSP00000294360 |
| ENSP00000294753 | ENSP00000295006 | ENSP00000295206 |
| ENSP00000295297 | ENSP00000295321 | ENSP00000295453 |
| ENSP00000295566 | ENSP00000295571 | ENSP00000295624 |
| ENSP00000295682 | ENSP00000295683 | ENSP00000295704 |
| ENSP00000295727 | ENSP00000295736 | ENSP00000295757 |
| ENSP00000295771 | ENSP00000295901 | ENSP00000295937 |
| ENSP00000295962 | ENSP00000295971 | ENSP00000295974 |
| ENSP00000296043 | ENSP00000296051 | ENSP00000296096 |
| ENSP00000296266 | ENSP00000296350 | ENSP00000296412 |
| ENSP00000296417 | ENSP00000296420 | ENSP00000296424 |
| ENSP00000296452 | ENSP00000296518 | ENSP00000296589 |
| ENSP00000296597 | ENSP00000296733 | ENSP00000296794 |
| ENSP00000296824 | ENSP00000296882 | ENSP00000297107 |
| ENSP00000297130 | ENSP00000297135 | ENSP00000297151 |

|                 |                 |                 |
|-----------------|-----------------|-----------------|
| ENSP00000297163 | ENSP00000297273 | ENSP00000297354 |
| ENSP00000297469 | ENSP00000297512 | ENSP00000297623 |
| ENSP00000297625 | ENSP00000297689 | ENSP00000297784 |
| ENSP00000297785 | ENSP00000297792 | ENSP00000297977 |
| ENSP00000297988 | ENSP00000298050 | ENSP00000298129 |
| ENSP00000298428 | ENSP00000298527 | ENSP00000298585 |
| ENSP00000298694 | ENSP00000298784 | ENSP00000298832 |
| ENSP00000299157 | ENSP00000299424 | ENSP00000299601 |
| ENSP00000299626 | ENSP00000299667 | ENSP00000299687 |
| ENSP00000299727 | ENSP00000299759 | ENSP00000299766 |
| ENSP00000299824 | ENSP00000299847 | ENSP00000299866 |
| ENSP00000300093 | ENSP00000300134 | ENSP00000300215 |
| ENSP00000300289 | ENSP00000300589 | ENSP00000300738 |
| ENSP00000300811 | ENSP00000300900 | ENSP00000300917 |
| ENSP00000300961 | ENSP00000301011 | ENSP00000301030 |
| ENSP00000301037 | ENSP00000301050 | ENSP00000301061 |
| ENSP00000301263 | ENSP00000301272 | ENSP00000301420 |
| ENSP00000301547 | ENSP00000301656 | ENSP00000301765 |
| ENSP00000301819 | ENSP00000301905 | ENSP00000301917 |
| ENSP00000301995 | ENSP00000302037 | ENSP00000302046 |
| ENSP00000302120 | ENSP00000302139 | ENSP00000302239 |
| ENSP00000302276 | ENSP00000302289 | ENSP00000302393 |
| ENSP00000302569 | ENSP00000302586 | ENSP00000302665 |
| ENSP00000302924 | ENSP00000302936 | ENSP00000302938 |
| ENSP00000302994 | ENSP00000303015 | ENSP00000303434 |
| ENSP00000303686 | ENSP00000303709 | ENSP00000303766 |
| ENSP00000303844 | ENSP00000303939 | ENSP00000304006 |
| ENSP00000304060 | ENSP00000304283 | ENSP00000304290 |
| ENSP00000304308 | ENSP00000304353 | ENSP00000304376 |
| ENSP00000304408 | ENSP00000304593 | ENSP00000304701 |
| ENSP00000304875 | ENSP00000304891 | ENSP00000304945 |
| ENSP00000305263 | ENSP00000305288 | ENSP00000305403 |
| ENSP00000305502 | ENSP00000305596 | ENSP00000305682 |
| ENSP00000305804 | ENSP00000305839 | ENSP00000305852 |
| ENSP00000305906 | ENSP00000305964 | ENSP00000305973 |
| ENSP00000306105 | ENSP00000306220 | ENSP00000306344 |
| ENSP00000306397 | ENSP00000306752 | ENSP00000306894 |
| ENSP00000306918 | ENSP00000306974 | ENSP00000307071 |
| ENSP00000307096 | ENSP00000307134 | ENSP00000307183 |
| ENSP00000307206 | ENSP00000307387 | ENSP00000307423 |
| ENSP00000307525 | ENSP00000307567 | ENSP00000307666 |
| ENSP00000307674 | ENSP00000307889 | ENSP00000307954 |
| ENSP00000308208 | ENSP00000308226 | ENSP00000308270 |
| ENSP00000308430 | ENSP00000308461 | ENSP00000308727 |

|                 |                 |                 |
|-----------------|-----------------|-----------------|
| ENSP00000308741 | ENSP00000308893 | ENSP00000308901 |
| ENSP00000308938 | ENSP00000308957 | ENSP00000309052 |
| ENSP00000309096 | ENSP00000309103 | ENSP00000309186 |
| ENSP00000309259 | ENSP00000309365 | ENSP00000309402 |
| ENSP00000309432 | ENSP00000309433 | ENSP00000309463 |
| ENSP00000309542 | ENSP00000309606 | ENSP00000309714 |
| ENSP00000309751 | ENSP00000309913 | ENSP00000309953 |
| ENSP00000309968 | ENSP00000310006 | ENSP00000310088 |
| ENSP00000310275 | ENSP00000310309 | ENSP00000310321 |
| ENSP00000310448 | ENSP00000310547 | ENSP00000310551 |
| ENSP00000310568 | ENSP00000310573 | ENSP00000310623 |
| ENSP00000310668 | ENSP00000310770 | ENSP00000310788 |
| ENSP00000310796 | ENSP00000310814 | ENSP00000310966 |
| ENSP00000310978 | ENSP00000310998 | ENSP00000311032 |
| ENSP00000311121 | ENSP00000311200 | ENSP00000311202 |
| ENSP00000311360 | ENSP00000311479 | ENSP00000311712 |
| ENSP00000311713 | ENSP00000311747 | ENSP00000311833 |
| ENSP00000311837 | ENSP00000312042 | ENSP00000312050 |
| ENSP00000312066 | ENSP00000312143 | ENSP00000312150 |
| ENSP00000312326 | ENSP00000312370 | ENSP00000312415 |
| ENSP00000312624 | ENSP00000312649 | ENSP00000312664 |
| ENSP00000312767 | ENSP00000312988 | ENSP00000313021 |
| ENSP00000313046 | ENSP00000313172 | ENSP00000313199 |
| ENSP00000313377 | ENSP00000313506 | ENSP00000313875 |
| ENSP00000313890 | ENSP00000314036 | ENSP00000314343 |
| ENSP00000314414 | ENSP00000314508 | ENSP00000314528 |
| ENSP00000314606 | ENSP00000314827 | ENSP00000314901 |
| ENSP00000315035 | ENSP00000315182 | ENSP00000315212 |
| ENSP00000315614 | ENSP00000315630 | ENSP00000315644 |
| ENSP00000315654 | ENSP00000315674 | ENSP00000315693 |
| ENSP00000315774 | ENSP00000315835 | ENSP00000315931 |
| ENSP00000316092 | ENSP00000316222 | ENSP00000316454 |
| ENSP00000316905 | ENSP00000316950 | ENSP00000317121 |
| ENSP00000317141 | ENSP00000317144 | ENSP00000317224 |
| ENSP00000317232 | ENSP00000317334 | ENSP00000317357 |
| ENSP00000317445 | ENSP00000317564 | ENSP00000317595 |
| ENSP00000317790 | ENSP00000317895 | ENSP00000317905 |
| ENSP00000318057 | ENSP00000318115 | ENSP00000318128 |
| ENSP00000318147 | ENSP00000318182 | ENSP00000318629 |
| ENSP00000318716 | ENSP00000318770 | ENSP00000318799 |
| ENSP00000318869 | ENSP00000318999 | ENSP00000319170 |
| ENSP00000319254 | ENSP00000319388 | ENSP00000319511 |
| ENSP00000319531 | ENSP00000319610 | ENSP00000319622 |
| ENSP00000319636 | ENSP00000319984 | ENSP00000319991 |

|                 |                 |                 |
|-----------------|-----------------|-----------------|
| ENSP00000320038 | ENSP00000320043 | ENSP00000320081 |
| ENSP00000320083 | ENSP00000320246 | ENSP00000320247 |
| ENSP00000320303 | ENSP00000320346 | ENSP00000320349 |
| ENSP00000320431 | ENSP00000320503 | ENSP00000320563 |
| ENSP00000320604 | ENSP00000320672 | ENSP00000320709 |
| ENSP00000320848 | ENSP00000320886 | ENSP00000321108 |
| ENSP00000321133 | ENSP00000321196 | ENSP00000321346 |
| ENSP00000321406 | ENSP00000321449 | ENSP00000321584 |
| ENSP00000321594 | ENSP00000321679 | ENSP00000321951 |
| ENSP00000322088 | ENSP00000322191 | ENSP00000322192 |
| ENSP00000322234 | ENSP00000322524 | ENSP00000322568 |
| ENSP00000322582 | ENSP00000322617 | ENSP00000322730 |
| ENSP00000322915 | ENSP00000322924 | ENSP00000322991 |
| ENSP00000323050 | ENSP00000323099 | ENSP00000323300 |
| ENSP00000323328 | ENSP00000323387 | ENSP00000323424 |
| ENSP00000323479 | ENSP00000323568 | ENSP00000323584 |
| ENSP00000323663 | ENSP00000323696 | ENSP00000323720 |
| ENSP00000323777 | ENSP00000323811 | ENSP00000323822 |
| ENSP00000323837 | ENSP00000323982 | ENSP00000324438 |
| ENSP00000324534 | ENSP00000324549 | ENSP00000324570 |
| ENSP00000324651 | ENSP00000324769 | ENSP00000324857 |
| ENSP00000324870 | ENSP00000325296 | ENSP00000325312 |
| ENSP00000325506 | ENSP00000325508 | ENSP00000325526 |
| ENSP00000325634 | ENSP00000325738 | ENSP00000326022 |
| ENSP00000326031 | ENSP00000326070 | ENSP00000326238 |
| ENSP00000326340 | ENSP00000326519 | ENSP00000326737 |
| ENSP00000326817 | ENSP00000326888 | ENSP00000327070 |
| ENSP00000327075 | ENSP00000327133 | ENSP00000327179 |
| ENSP00000327197 | ENSP00000327315 | ENSP00000327336 |
| ENSP00000327704 | ENSP00000328103 | ENSP00000328207 |
| ENSP00000328287 | ENSP00000328397 | ENSP00000328472 |
| ENSP00000328484 | ENSP00000328511 | ENSP00000328690 |
| ENSP00000328747 | ENSP00000328800 | ENSP00000328818 |
| ENSP00000329167 | ENSP00000329219 | ENSP00000329243 |
| ENSP00000329357 | ENSP00000329482 | ENSP00000329499 |
| ENSP00000329568 | ENSP00000329715 | ENSP00000329797 |
| ENSP00000329930 | ENSP00000329964 | ENSP00000329991 |
| ENSP00000330005 | ENSP00000330031 | ENSP00000330276 |
| ENSP00000330284 | ENSP00000330374 | ENSP00000330382 |
| ENSP00000330523 | ENSP00000330572 | ENSP00000330658 |
| ENSP00000330694 | ENSP00000330732 | ENSP00000330813 |
| ENSP00000330965 | ENSP00000331106 | ENSP00000331209 |
| ENSP00000331242 | ENSP00000331258 | ENSP00000331572 |
| ENSP00000331681 | ENSP00000331746 | ENSP00000331867 |



|                 |                 |                 |
|-----------------|-----------------|-----------------|
| ENSP00000331938 | ENSP00000332018 | ENSP00000332052 |
| ENSP00000332062 | ENSP00000332123 | ENSP00000332139 |
| ENSP00000332163 | ENSP00000332407 | ENSP00000332444 |
| ENSP00000332455 | ENSP00000332576 | ENSP00000332591 |
| ENSP00000332613 | ENSP00000332756 | ENSP00000332818 |
| ENSP00000332823 | ENSP00000333018 | ENSP00000333203 |
| ENSP00000333537 | ENSP00000333553 | ENSP00000333638 |
| ENSP00000333697 | ENSP00000333744 | ENSP00000334153 |
| ENSP00000334216 | ENSP00000334229 | ENSP00000334280 |
| ENSP00000334300 | ENSP00000334308 | ENSP00000334415 |
| ENSP00000334441 | ENSP00000334448 | ENSP00000334474 |
| ENSP00000334657 | ENSP00000334681 | ENSP00000334714 |
| ENSP00000334910 | ENSP00000334962 | ENSP00000335083 |
| ENSP00000335246 | ENSP00000335306 | ENSP00000335357 |
| ENSP00000335486 | ENSP00000335511 | ENSP00000336655 |
| ENSP00000336673 | ENSP00000336801 | ENSP00000337040 |
| ENSP00000337056 | ENSP00000337159 | ENSP00000337194 |
| ENSP00000337209 | ENSP00000337265 | ENSP00000337289 |
| ENSP00000337313 | ENSP00000337432 | ENSP00000337452 |
| ENSP00000337463 | ENSP00000337733 | ENSP00000337757 |
| ENSP00000337838 | ENSP00000337972 | ENSP00000338050 |
| ENSP00000338127 | ENSP00000338141 | ENSP00000338217 |
| ENSP00000338293 | ENSP00000338487 | ENSP00000338510 |
| ENSP00000338524 | ENSP00000338533 | ENSP00000338562 |
| ENSP00000338613 | ENSP00000338707 | ENSP00000338727 |
| ENSP00000339057 | ENSP00000339115 | ENSP00000339161 |
| ENSP00000339208 | ENSP00000339390 | ENSP00000339449 |
| ENSP00000339503 | ENSP00000339769 | ENSP00000339844 |
| ENSP00000339861 | ENSP00000339958 | ENSP00000339960 |
| ENSP00000340271 | ENSP00000340278 | ENSP00000340296 |
| ENSP00000340328 | ENSP00000340330 | ENSP00000340347 |
| ENSP00000340396 | ENSP00000340409 | ENSP00000340466 |
| ENSP00000340474 | ENSP00000340684 | ENSP00000340691 |
| ENSP00000340748 | ENSP00000340761 | ENSP00000340766 |
| ENSP00000340811 | ENSP00000340982 | ENSP00000341083 |
| ENSP00000341094 | ENSP00000341213 | ENSP00000341422 |
| ENSP00000341489 | ENSP00000341524 | ENSP00000341539 |
| ENSP00000341581 | ENSP00000341698 | ENSP00000341743 |
| ENSP00000341756 | ENSP00000341838 | ENSP00000341942 |
| ENSP00000342059 | ENSP00000342071 | ENSP00000342267 |
| ENSP00000342374 | ENSP00000342564 | ENSP00000342623 |
| ENSP00000342656 | ENSP00000342812 | ENSP00000342818 |
| ENSP00000342952 | ENSP00000343023 | ENSP00000343054 |
| ENSP00000343164 | ENSP00000343244 | ENSP00000343246 |

|                 |                 |                 |
|-----------------|-----------------|-----------------|
| ENSP00000343248 | ENSP00000343282 | ENSP00000343325 |
| ENSP00000343348 | ENSP00000343430 | ENSP00000343435 |
| ENSP00000343464 | ENSP00000343479 | ENSP00000343557 |
| ENSP00000343593 | ENSP00000343617 | ENSP00000343645 |
| ENSP00000343706 | ENSP00000343709 | ENSP00000343742 |
| ENSP00000343763 | ENSP00000343765 | ENSP00000343891 |
| ENSP00000344223 | ENSP00000344260 | ENSP00000344352 |
| ENSP00000344402 | ENSP00000344446 | ENSP00000344489 |
| ENSP00000344545 | ENSP00000344587 | ENSP00000344749 |
| ENSP00000344829 | ENSP00000344976 | ENSP00000344989 |
| ENSP00000345023 | ENSP00000345133 | ENSP00000345156 |
| ENSP00000345161 | ENSP00000345193 | ENSP00000345270 |
| ENSP00000345333 | ENSP00000345341 | ENSP00000345344 |
| ENSP00000345492 | ENSP00000345532 | ENSP00000345633 |
| ENSP00000345681 | ENSP00000345689 | ENSP00000345772 |
| ENSP00000345972 | ENSP00000345974 | ENSP00000346103 |
| ENSP00000346127 | ENSP00000346139 | ENSP00000346206 |
| ENSP00000346255 | ENSP00000346256 | ENSP00000346300 |
| ENSP00000346316 | ENSP00000346340 | ENSP00000346453 |
| ENSP00000346508 | ENSP00000346566 | ENSP00000346599 |
| ENSP00000346644 | ENSP00000346697 | ENSP00000346800 |
| ENSP00000346886 | ENSP00000346913 | ENSP00000346986 |
| ENSP00000347045 | ENSP00000347117 | ENSP00000347152 |
| ENSP00000347161 | ENSP00000347314 | ENSP00000347338 |
| ENSP00000347339 | ENSP00000347409 | ENSP00000347444 |
| ENSP00000347581 | ENSP00000347710 | ENSP00000347810 |
| ENSP00000347872 | ENSP00000348206 | ENSP00000348215 |
| ENSP00000348234 | ENSP00000348258 | ENSP00000348300 |
| ENSP00000348302 | ENSP00000348381 | ENSP00000348394 |
| ENSP00000348395 | ENSP00000348401 | ENSP00000348429 |
| ENSP00000348449 | ENSP00000348593 | ENSP00000348634 |
| ENSP00000348877 | ENSP00000349078 | ENSP00000349145 |
| ENSP00000349205 | ENSP00000349238 | ENSP00000349270 |
| ENSP00000349391 | ENSP00000349393 | ENSP00000349562 |
| ENSP00000349595 | ENSP00000349629 | ENSP00000349709 |
| ENSP00000349877 | ENSP00000349929 | ENSP00000349970 |
| ENSP00000350003 | ENSP00000350005 | ENSP00000350017 |
| ENSP00000350132 | ENSP00000350195 | ENSP00000350199 |
| ENSP00000350263 | ENSP00000350332 | ENSP00000350716 |
| ENSP00000350961 | ENSP00000350976 | ENSP00000351132 |
| ENSP00000351325 | ENSP00000351416 | ENSP00000351605 |
| ENSP00000351608 | ENSP00000351684 | ENSP00000351717 |
| ENSP00000351727 | ENSP00000351790 | ENSP00000351813 |
| ENSP00000351939 | ENSP00000352021 | ENSP00000352097 |

|                 |                 |                 |
|-----------------|-----------------|-----------------|
| ENSP00000352101 | ENSP00000352305 | ENSP00000352665 |
| ENSP00000352712 | ENSP00000352770 | ENSP00000352839 |
| ENSP00000352842 | ENSP00000352849 | ENSP00000352989 |
| ENSP00000353013 | ENSP00000353078 | ENSP00000353093 |
| ENSP00000353094 | ENSP00000353099 | ENSP00000353142 |
| ENSP00000353259 | ENSP00000353491 | ENSP00000353557 |
| ENSP00000353575 | ENSP00000353582 | ENSP00000353652 |
| ENSP00000353655 | ENSP00000353656 | ENSP00000353677 |
| ENSP00000353731 | ENSP00000353735 | ENSP00000353940 |
| ENSP00000354270 | ENSP00000354293 | ENSP00000354332 |
| ENSP00000354340 | ENSP00000354458 | ENSP00000354522 |
| ENSP00000354536 | ENSP00000354541 | ENSP00000354580 |
| ENSP00000354689 | ENSP00000354717 | ENSP00000354826 |
| ENSP00000354927 | ENSP00000355010 | ENSP00000355031 |
| ENSP00000355050 | ENSP00000355173 | ENSP00000355177 |
| ENSP00000355192 | ENSP00000355195 | ENSP00000355228 |
| ENSP00000355396 | ENSP00000355431 | ENSP00000355556 |
| ENSP00000355583 | ENSP00000355799 | ENSP00000355870 |
| ENSP00000355920 | ENSP00000355924 | ENSP00000355958 |
| ENSP00000356016 | ENSP00000356105 | ENSP00000356170 |
| ENSP00000356251 | ENSP00000356263 | ENSP00000356370 |
| ENSP00000356468 | ENSP00000356473 | ENSP00000356476 |
| ENSP00000356536 | ENSP00000356552 | ENSP00000356563 |
| ENSP00000356590 | ENSP00000356674 | ENSP00000356700 |
| ENSP00000356737 | ENSP00000356744 | ENSP00000356811 |
| ENSP00000356908 | ENSP00000356918 | ENSP00000356969 |
| ENSP00000356975 | ENSP00000356982 | ENSP00000357033 |
| ENSP00000357058 | ENSP00000357060 | ENSP00000357079 |
| ENSP00000357086 | ENSP00000357103 | ENSP00000357152 |
| ENSP00000357156 | ENSP00000357189 | ENSP00000357206 |
| ENSP00000357278 | ENSP00000357387 | ENSP00000357461 |
| ENSP00000357494 | ENSP00000357555 | ENSP00000357650 |
| ENSP00000357674 | ENSP00000357682 | ENSP00000357683 |
| ENSP00000357721 | ENSP00000357726 | ENSP00000357748 |
| ENSP00000357775 | ENSP00000357794 | ENSP00000357796 |
| ENSP00000357844 | ENSP00000357920 | ENSP00000358031 |
| ENSP00000358033 | ENSP00000358071 | ENSP00000358147 |
| ENSP00000358232 | ENSP00000358242 | ENSP00000358391 |
| ENSP00000358417 | ENSP00000358430 | ENSP00000358470 |
| ENSP00000358490 | ENSP00000358510 | ENSP00000358714 |
| ENSP00000358719 | ENSP00000358730 | ENSP00000358777 |
| ENSP00000358857 | ENSP00000358888 | ENSP00000358925 |
| ENSP00000358966 | ENSP00000359024 | ENSP00000359070 |
| ENSP00000359221 | ENSP00000359234 | ENSP00000359240 |

|                 |                 |                 |
|-----------------|-----------------|-----------------|
| ENSP00000359258 | ENSP00000359321 | ENSP00000359329 |
| ENSP00000359334 | ENSP00000359356 | ENSP00000359368 |
| ENSP00000359370 | ENSP00000359376 | ENSP00000359380 |
| ENSP00000359425 | ENSP00000359490 | ENSP00000359504 |
| ENSP00000359520 | ENSP00000359549 | ENSP00000359594 |
| ENSP00000359663 | ENSP00000359685 | ENSP00000359699 |
| ENSP00000359719 | ENSP00000359772 | ENSP00000359795 |
| ENSP00000359848 | ENSP00000359899 | ENSP00000359925 |
| ENSP00000359942 | ENSP00000359998 | ENSP00000360147 |
| ENSP00000360167 | ENSP00000360217 | ENSP00000360235 |
| ENSP00000360269 | ENSP00000360310 | ENSP00000360360 |
| ENSP00000360381 | ENSP00000360412 | ENSP00000360437 |
| ENSP00000360441 | ENSP00000360472 | ENSP00000360488 |
| ENSP00000360498 | ENSP00000360519 | ENSP00000360530 |
| ENSP00000360806 | ENSP00000360829 | ENSP00000360905 |
| ENSP00000360966 | ENSP00000361005 | ENSP00000361027 |
| ENSP00000361095 | ENSP00000361186 | ENSP00000361331 |
| ENSP00000361359 | ENSP00000361373 | ENSP00000361381 |
| ENSP00000361423 | ENSP00000361536 | ENSP00000361544 |
| ENSP00000361548 | ENSP00000361672 | ENSP00000361746 |
| ENSP00000361843 | ENSP00000361935 | ENSP00000362095 |
| ENSP00000362122 | ENSP00000362207 | ENSP00000362255 |
| ENSP00000362283 | ENSP00000362298 | ENSP00000362399 |
| ENSP00000362424 | ENSP00000362465 | ENSP00000362508 |
| ENSP00000362524 | ENSP00000362551 | ENSP00000362590 |
| ENSP00000362638 | ENSP00000362748 | ENSP00000362781 |
| ENSP00000362978 | ENSP00000362994 | ENSP00000363019 |
| ENSP00000363055 | ENSP00000363071 | ENSP00000363081 |
| ENSP00000363108 | ENSP00000363207 | ENSP00000363329 |
| ENSP00000363391 | ENSP00000363392 | ENSP00000363459 |
| ENSP00000363590 | ENSP00000363603 | ENSP00000363647 |
| ENSP00000363747 | ENSP00000363787 | ENSP00000363799 |
| ENSP00000363970 | ENSP00000364094 | ENSP00000364246 |
| ENSP00000364260 | ENSP00000364270 | ENSP00000364287 |
| ENSP00000364501 | ENSP00000364737 | ENSP00000364749 |
| ENSP00000364847 | ENSP00000364858 | ENSP00000364864 |
| ENSP00000364883 | ENSP00000364965 | ENSP00000365081 |
| ENSP00000365350 | ENSP00000365465 | ENSP00000365528 |
| ENSP00000365624 | ENSP00000365663 | ENSP00000365757 |
| ENSP00000365775 | ENSP00000365844 | ENSP00000365943 |
| ENSP00000365962 | ENSP00000366032 | ENSP00000366234 |
| ENSP00000366244 | ENSP00000366273 | ENSP00000366299 |
| ENSP00000366487 | ENSP00000366522 | ENSP00000366525 |
| ENSP00000366534 | ENSP00000366563 | ENSP00000366586 |

|                 |                 |                 |
|-----------------|-----------------|-----------------|
| ENSP00000366593 | ENSP00000366608 | ENSP00000366679 |
| ENSP00000366899 | ENSP00000366939 | ENSP00000366948 |
| ENSP00000366999 | ENSP00000367034 | ENSP00000367172 |
| ENSP00000367369 | ENSP00000367453 | ENSP00000367528 |
| ENSP00000367570 | ENSP00000367638 | ENSP00000367664 |
| ENSP00000367700 | ENSP00000367766 | ENSP00000367841 |
| ENSP00000367891 | ENSP00000367992 | ENSP00000368062 |
| ENSP00000368144 | ENSP00000368169 | ENSP00000368174 |
| ENSP00000368237 | ENSP00000368305 | ENSP00000368350 |
| ENSP00000368351 | ENSP00000368391 | ENSP00000368402 |
| ENSP00000368459 | ENSP00000368547 | ENSP00000368589 |
| ENSP00000368684 | ENSP00000368748 | ENSP00000368856 |
| ENSP00000369129 | ENSP00000369135 | ENSP00000369146 |
| ENSP00000369198 | ENSP00000369251 | ENSP00000369257 |
| ENSP00000369380 | ENSP00000369442 | ENSP00000369473 |
| ENSP00000369558 | ENSP00000369568 | ENSP00000369695 |
| ENSP00000369725 | ENSP00000369727 | ENSP00000369739 |
| ENSP00000369757 | ENSP00000369784 | ENSP00000369823 |
| ENSP00000369895 | ENSP00000370021 | ENSP00000370031 |
| ENSP00000370047 | ENSP00000370150 | ENSP00000370151 |
| ENSP00000370191 | ENSP00000370259 | ENSP00000370316 |
| ENSP00000370343 | ENSP00000370391 | ENSP00000370508 |
| ENSP00000370639 | ENSP00000370648 | ENSP00000370766 |
| ENSP00000370808 | ENSP00000370826 | ENSP00000370883 |
| ENSP00000370990 | ENSP00000371037 | ENSP00000371070 |
| ENSP00000371085 | ENSP00000371232 | ENSP00000371308 |
| ENSP00000371432 | ENSP00000371434 | ENSP00000371471 |
| ENSP00000371514 | ENSP00000371886 | ENSP00000371994 |
| ENSP00000372155 | ENSP00000372160 | ENSP00000372199 |
| ENSP00000372210 | ENSP00000372292 | ENSP00000372459 |
| ENSP00000372599 | ENSP00000372703 | ENSP00000372723 |
| ENSP00000372734 | ENSP00000372746 | ENSP00000372827 |
| ENSP00000372857 | ENSP00000372914 | ENSP00000372930 |
| ENSP00000372980 | ENSP00000372991 | ENSP00000373004 |
| ENSP00000373031 | ENSP00000373114 | ENSP00000373586 |
| ENSP00000373694 | ENSP00000373698 | ENSP00000373715 |
| ENSP00000373730 | ENSP00000373918 | ENSP00000374205 |
| ENSP00000374332 | ENSP00000374448 | ENSP00000374484 |
| ENSP00000374813 | ENSP00000374904 | ENSP00000374944 |
| ENSP00000374979 | ENSP00000374989 | ENSP00000375045 |
| ENSP00000375086 | ENSP00000375181 | ENSP00000375598 |
| ENSP00000375629 | ENSP00000375783 | ENSP00000375829 |
| ENSP00000375844 | ENSP00000375855 | ENSP00000376188 |
| ENSP00000376309 | ENSP00000376333 | ENSP00000376436 |

|                 |                 |                 |
|-----------------|-----------------|-----------------|
| ENSP00000376553 | ENSP00000376623 | ENSP00000376652 |
| ENSP00000376865 | ENSP00000376871 | ENSP00000377218 |
| ENSP00000377233 | ENSP00000377344 | ENSP00000377558 |
| ENSP00000377717 | ENSP00000378161 | ENSP00000378326 |
| ENSP00000378517 | ENSP00000378529 | ENSP00000378786 |
| ENSP00000378788 | ENSP00000378792 | ENSP00000379213 |
| ENSP00000379616 | ENSP00000379625 | ENSP00000379669 |
| ENSP00000379678 | ENSP00000379865 | ENSP00000379884 |
| ENSP00000380025 | ENSP00000380109 | ENSP00000380413 |
| ENSP00000380557 | ENSP00000380635 | ENSP00000380982 |
| ENSP00000381086 | ENSP00000381129 | ENSP00000381148 |
| ENSP00000381177 | ENSP00000381227 | ENSP00000381272 |
| ENSP00000381504 | ENSP00000381526 | ENSP00000381553 |
| ENSP00000381631 | ENSP00000381840 | ENSP00000381950 |
| ENSP00000381951 | ENSP00000382004 | ENSP00000382026 |
| ENSP00000382104 | ENSP00000382166 | ENSP00000382218 |
| ENSP00000382274 | ENSP00000382281 | ENSP00000382373 |
| ENSP00000382790 | ENSP00000382875 | ENSP00000383155 |
| ENSP00000383360 | ENSP00000383506 | ENSP00000383521 |
| ENSP00000383549 | ENSP00000383611 | ENSP00000383628 |
| ENSP00000383900 | ENSP00000383901 | ENSP00000384169 |
| ENSP00000384179 | ENSP00000384313 | ENSP00000384383 |
| ENSP00000384398 | ENSP00000384597 | ENSP00000384675 |
| ENSP00000384690 | ENSP00000384708 | ENSP00000384903 |
| ENSP00000384979 | ENSP00000385143 | ENSP00000385215 |
| ENSP00000385347 | ENSP00000385899 | ENSP00000385939 |
| ENSP00000385995 | ENSP00000386069 | ENSP00000386092 |
| ENSP00000386121 | ENSP00000386161 | ENSP00000386167 |
| ENSP00000386174 | ENSP00000386184 | ENSP00000386222 |
| ENSP00000386239 | ENSP00000386502 | ENSP00000386621 |
| ENSP00000386717 | ENSP00000386992 | ENSP00000387040 |
| ENSP00000387170 | ENSP00000387252 | ENSP00000387266 |
| ENSP00000387278 | ENSP00000387310 | ENSP00000387412 |
| ENSP00000388356 | ENSP00000388631 | ENSP00000388662 |
| ENSP00000388779 | ENSP00000388842 | ENSP00000388987 |
| ENSP00000389244 | ENSP00000389427 | ENSP00000389490 |
| ENSP00000389630 | ENSP00000389709 | ENSP00000389792 |
| ENSP00000389817 | ENSP00000389913 | ENSP00000390070 |
| ENSP00000390134 | ENSP00000390590 | ENSP00000391069 |
| ENSP00000391386 | ENSP00000391402 | ENSP00000391404 |
| ENSP00000391457 | ENSP00000391564 | ENSP00000391638 |
| ENSP00000391735 | ENSP00000392466 | ENSP00000392678 |
| ENSP00000393198 | ENSP00000393324 | ENSP00000393335 |
| ENSP00000393381 | ENSP00000393393 | ENSP00000393549 |

|                 |                 |                 |
|-----------------|-----------------|-----------------|
| ENSP00000393631 | ENSP00000393642 | ENSP00000393751 |
| ENSP00000393889 | ENSP00000393958 | ENSP00000394842 |
| ENSP00000394863 | ENSP00000395015 | ENSP00000395225 |
| ENSP00000395497 | ENSP00000395656 | ENSP00000395699 |
| ENSP00000395780 | ENSP00000396045 | ENSP00000396152 |
| ENSP00000396163 | ENSP00000396732 | ENSP00000397118 |
| ENSP00000397140 | ENSP00000397405 | ENSP00000397636 |
| ENSP00000397705 | ENSP00000397759 | ENSP00000397872 |
| ENSP00000397971 | ENSP00000398064 | ENSP00000398103 |
| ENSP00000398163 | ENSP00000398342 | ENSP00000398462 |
| ENSP00000398671 | ENSP00000398971 | ENSP00000399011 |
| ENSP00000399013 | ENSP00000399078 | ENSP00000399255 |
| ENSP00000399565 | ENSP00000400046 | ENSP00000400157 |
| ENSP00000400476 | ENSP00000400867 | ENSP00000401087 |
| ENSP00000401177 | ENSP00000401371 | ENSP00000401513 |
| ENSP00000401596 | ENSP00000401786 | ENSP00000401980 |
| ENSP00000402038 | ENSP00000402181 | ENSP00000402343 |
| ENSP00000402527 | ENSP00000403246 | ENSP00000403698 |
| ENSP00000403721 | ENSP00000403780 | ENSP00000403802 |
| ENSP00000404231 | ENSP00000404306 | ENSP00000404381 |
| ENSP00000404416 | ENSP00000404438 | ENSP00000404539 |
| ENSP00000405108 | ENSP00000405176 | ENSP00000405636 |
| ENSP00000405738 | ENSP00000405950 | ENSP00000406271 |
| ENSP00000406288 | ENSP00000406378 | ENSP00000406547 |
| ENSP00000406706 | ENSP00000406832 | ENSP00000406933 |
| ENSP00000407233 | ENSP00000407375 | ENSP00000407452 |
| ENSP00000407460 | ENSP00000407779 | ENSP00000407885 |
| ENSP00000407952 | ENSP00000407978 | ENSP00000407981 |
| ENSP00000408017 | ENSP00000408207 | ENSP00000408395 |
| ENSP00000408398 | ENSP00000408451 | ENSP00000408453 |
| ENSP00000408581 | ENSP00000408860 | ENSP00000409285 |
| ENSP00000409382 | ENSP00000409403 | ENSP00000409493 |
| ENSP00000409912 | ENSP00000410088 | ENSP00000410098 |
| ENSP00000410420 | ENSP00000410758 | ENSP00000411099 |
| ENSP00000411115 | ENSP00000411397 | ENSP00000411471 |
| ENSP00000411847 | ENSP00000411949 | ENSP00000411990 |
| ENSP00000412031 | ENSP00000412060 | ENSP00000412309 |
| ENSP00000412553 | ENSP00000412800 | ENSP00000413007 |
| ENSP00000413009 | ENSP00000413404 | ENSP00000413405 |
| ENSP00000413575 | ENSP00000413625 | ENSP00000413706 |
| ENSP00000413949 | ENSP00000413961 | ENSP00000414302 |
| ENSP00000414667 | ENSP00000414777 | ENSP00000414780 |
| ENSP00000415106 | ENSP00000415222 | ENSP00000415464 |
| ENSP00000415477 | ENSP00000415769 | ENSP00000415941 |

|                 |                 |                 |
|-----------------|-----------------|-----------------|
| ENSP00000416095 | ENSP00000416141 | ENSP00000416293 |
| ENSP00000416320 | ENSP00000416753 | ENSP00000417052 |
| ENSP00000417147 | ENSP00000417164 | ENSP00000417257 |
| ENSP00000417300 | ENSP00000417492 | ENSP00000417587 |
| ENSP00000417601 | ENSP00000417628 | ENSP00000417748 |
| ENSP00000417764 | ENSP00000418001 | ENSP00000418348 |
| ENSP00000418447 | ENSP00000418575 | ENSP00000418649 |
| ENSP00000418768 | ENSP00000418823 | ENSP00000418994 |
| ENSP00000419371 | ENSP00000419449 | ENSP00000419923 |
| ENSP00000420405 | ENSP00000420517 | ENSP00000420820 |
