# Supplementary material for: Gene Ontology and KEGG Enrichment Analyses of Genes Related to Age-Related Macular Degeneration
Source: Hindawi journal article supplement (doi:10.1155/2014/450386), 2014-01-01
Supplement: f1 [file 450386.f1.zip]

**Supplementary Material II.** The MaxRel features list and mRMR features list obtained by mRMR method for each dataset.

(1) Dataset  $D_1$

a) MaxRel features list

| Rank | Feature name |
|------|--------------|
| 1    | GO:0030449   |
| 2    | hsa05150     |
| 3    | GO:0001970   |
| 4    | GO:0006956   |
| 5    | GO:0043183   |
| 6    | GO:0016495   |
| 7    | GO:0071953   |
| 8    | GO:0034436   |
| 9    | GO:0034437   |
| 10   | GO:0010001   |
| 11   | GO:0072563   |
| 12   | GO:0035645   |
| 13   | GO:0034189   |
| 14   | hsa04610     |
| 15   | GO:0071482   |
| 16   | GO:0001798   |
| 17   | GO:1900006   |
| 18   | GO:0048739   |
| 19   | GO:0043537   |
| 20   | GO:0043536   |
| 21   | GO:0010711   |
| 22   | GO:0010703   |
| 23   | GO:0034103   |
| 24   | GO:0060311   |
| 25   | GO:0060313   |
| 26   | GO:0021762   |
| 27   | GO:0005172   |
| 28   | GO:0051400   |
| 29   | GO:0038025   |
| 30   | GO:0004944   |
| 31   | GO:0043117   |
| 32   | GO:0002575   |
| 33   | GO:0010764   |
| 34   | GO:0006957   |
| 35   | GO:0003273   |
| 36   | GO:0014043   |

|    |            |
|----|------------|
| 37 | GO:0002462 |
| 38 | GO:0004943 |
| 39 | GO:0004876 |
| 40 | GO:0001850 |
| 41 | GO:0060319 |
| 42 | GO:1900086 |
| 43 | GO:0001938 |
| 44 | GO:0060342 |
| 45 | GO:0042253 |
| 46 | GO:2000256 |
| 47 | GO:0042231 |
| 48 | GO:0031109 |
| 49 | GO:0034346 |
| 50 | GO:0042033 |
| 51 | GO:0043331 |
| 52 | GO:0060312 |
| 53 | GO:0032930 |
| 54 | GO:0038091 |
| 55 | GO:0002042 |
| 56 | GO:0046629 |
| 57 | GO:0002429 |
| 58 | GO:0034405 |
| 59 | GO:0032958 |
| 60 | GO:0000302 |
| 61 | GO:0043184 |
| 62 | GO:0042095 |
| 63 | GO:0001300 |
| 64 | GO:0042660 |
| 65 | GO:0009409 |
| 66 | GO:0006958 |
| 67 | GO:0051651 |
| 68 | GO:0032805 |
| 69 | GO:0046911 |
| 70 | GO:0060754 |
| 71 | GO:0033627 |
| 72 | GO:0034447 |
| 73 | GO:0004866 |
| 74 | GO:0000189 |
| 75 | GO:0043498 |
| 76 | GO:0032855 |
| 77 | GO:0045766 |
| 78 | GO:0051918 |
| 79 | GO:0001540 |

|     |            |
|-----|------------|
| 80  | GO:0032432 |
| 81  | GO:0002551 |
| 82  | GO:0034021 |
| 83  | GO:0048844 |
| 84  | GO:0001315 |
| 85  | GO:0003069 |
| 86  | GO:0048773 |
| 87  | GO:0006940 |
| 88  | GO:0002457 |
| 89  | GO:0090037 |
| 90  | GO:0030949 |
| 91  | GO:0001910 |
| 92  | GO:0002693 |
| 93  | GO:0010477 |
| 94  | GO:0048845 |
| 95  | GO:0032809 |
| 96  | GO:0008228 |
| 97  | GO:0010863 |
| 98  | GO:0051856 |
| 99  | GO:0033364 |
| 100 | GO:0004962 |
| 101 | GO:0002282 |
| 102 | GO:0021940 |
| 103 | GO:0007497 |
| 104 | GO:0008209 |
| 105 | GO:0043171 |
| 106 | GO:0045541 |
| 107 | GO:0017158 |
| 108 | GO:0045429 |
| 109 | GO:0046813 |
| 110 | GO:0060346 |
| 111 | GO:0045103 |
| 112 | GO:0042088 |
| 113 | GO:0001968 |
| 114 | GO:0000303 |
| 115 | hsa05323   |
| 116 | GO:0004784 |
| 117 | GO:0019836 |
| 118 | GO:0010716 |
| 119 | GO:0038026 |
| 120 | GO:0032463 |
| 121 | GO:0050665 |
| 122 | GO:0051389 |

|     |            |
|-----|------------|
| 123 | GO:0014826 |
| 124 | GO:0061302 |
| 125 | GO:0031077 |
| 126 | GO:0030214 |
| 127 | GO:2001028 |
| 128 | GO:0051142 |
| 129 | GO:0071222 |
| 130 | GO:0001974 |
| 131 | GO:0048009 |
| 132 | GO:0005534 |
| 133 | GO:0032757 |
| 134 | GO:0048678 |
| 135 | GO:0070301 |
| 136 | GO:0052033 |
| 137 | GO:0007256 |
| 138 | GO:0048245 |
| 139 | GO:0009881 |
| 140 | GO:0005615 |
| 141 | GO:0030155 |
| 142 | GO:0032387 |
| 143 | GO:0033141 |
| 144 | GO:0051898 |
| 145 | GO:0005072 |
| 146 | GO:0071062 |
| 147 | GO:0030593 |
| 148 | GO:0005178 |
| 149 | GO:0007568 |
| 150 | GO:0006700 |
| 151 | GO:0050777 |
| 152 | GO:0042159 |
| 153 | GO:0051000 |
| 154 | GO:0070206 |
| 155 | GO:0051580 |
| 156 | GO:0010625 |
| 157 | GO:0044464 |
| 158 | GO:0019430 |
| 159 | GO:0001937 |
| 160 | GO:0031017 |
| 161 | GO:0060128 |
| 162 | GO:0032270 |
| 163 | GO:0030168 |
| 164 | GO:0048246 |
| 165 | GO:0042094 |

|     |            |
|-----|------------|
| 166 | GO:0010165 |
| 167 | GO:0051280 |
| 168 | GO:0021517 |
| 169 | GO:0019049 |
| 170 | GO:0045869 |
| 171 | GO:0007603 |
| 172 | GO:0031714 |
| 173 | GO:0010760 |
| 174 | GO:0006029 |
| 175 | GO:0045359 |
| 176 | GO:0034185 |
| 177 | GO:0042832 |
| 178 | GO:0071346 |
| 179 | GO:0042056 |
| 180 | GO:0030229 |
| 181 | GO:0042583 |
| 182 | GO:0005161 |
| 183 | GO:0010900 |
| 184 | GO:0032368 |
| 185 | GO:0018243 |
| 186 | GO:0018242 |
| 187 | GO:0034369 |
| 188 | GO:0006741 |
| 189 | GO:0004509 |
| 190 | GO:0008360 |
| 191 | GO:0060129 |
| 192 | GO:0032467 |
| 193 | GO:0061045 |
| 194 | GO:0002291 |
| 195 | GO:0014904 |
| 196 | GO:0014896 |
| 197 | GO:0009441 |
| 198 | GO:0060020 |
| 199 | GO:0034056 |
| 200 | GO:0030247 |
| 201 | GO:0071230 |
| 202 | GO:0060394 |
| 203 | GO:0010902 |
| 204 | GO:0005576 |
| 205 | GO:0009597 |
| 206 | GO:0055093 |
| 207 | GO:0032700 |
| 208 | GO:0032722 |

|     |            |
|-----|------------|
| 209 | GO:0045884 |
| 210 | GO:0038052 |
| 211 | GO:0060745 |
| 212 | GO:0031798 |
| 213 | GO:0022009 |
| 214 | GO:0001569 |
| 215 | GO:0043200 |
| 216 | GO:0032417 |
| 217 | GO:0010873 |
| 218 | GO:0048598 |
| 219 | GO:0071312 |
| 220 | GO:0035630 |
| 221 | GO:0051659 |
| 222 | GO:0014909 |
| 223 | GO:0060763 |
| 224 | GO:0051926 |
| 225 | GO:0033552 |
| 226 | GO:0030195 |
| 227 | GO:0048251 |
| 228 | GO:0051712 |
| 229 | GO:0033081 |
| 230 | GO:0030284 |
| 231 | GO:0035082 |
| 232 | GO:0005044 |
| 233 | GO:0042461 |
| 234 | GO:0006705 |
| 235 | GO:0060697 |
| 236 | GO:0060644 |
| 237 | GO:0046620 |
| 238 | GO:0048386 |
| 239 | GO:0005010 |
| 240 | GO:0060591 |
| 241 | GO:0030516 |
| 242 | GO:0005006 |
| 243 | GO:0042116 |
| 244 | GO:0005548 |
| 245 | GO:0042310 |
| 246 | GO:0006801 |
| 247 | GO:0006809 |
| 248 | GO:0060228 |
| 249 | GO:0070541 |
| 250 | GO:0001957 |
| 251 | GO:0045785 |

|     |            |
|-----|------------|
| 252 | GO:0060325 |
| 253 | GO:0009583 |
| 254 | GO:0070022 |
| 255 | GO:0060561 |
| 256 | GO:0016056 |
| 257 | GO:0001666 |
| 258 | GO:0030308 |
| 259 | GO:0010916 |
| 260 | GO:0004252 |
| 261 | GO:0060509 |
| 262 | GO:0060011 |
| 263 | GO:0050868 |
| 264 | GO:0050689 |
| 265 | GO:0043017 |
| 266 | GO:0007181 |
| 267 | GO:0033700 |
| 268 | GO:0019064 |
| 269 | GO:0060230 |
| 270 | GO:0031102 |
| 271 | GO:0070326 |
| 272 | GO:0070483 |
| 273 | GO:0033591 |
| 274 | GO:0048661 |
| 275 | GO:0060510 |
| 276 | GO:0002262 |
| 277 | GO:0046716 |
| 278 | GO:0051894 |
| 279 | GO:0000060 |
| 280 | GO:0070371 |
| 281 | GO:0060744 |
| 282 | GO:0010987 |
| 283 | GO:0004903 |
| 284 | GO:0070195 |
| 285 | GO:0004473 |
| 286 | GO:0005125 |
| 287 | GO:0043406 |
| 288 | GO:0050679 |
| 289 | GO:0034363 |
| 290 | GO:0008217 |
| 291 | GO:2000379 |
| 292 | GO:0005114 |
| 293 | GO:0010466 |
| 294 | GO:0005586 |

|     |            |
|-----|------------|
| 295 | hsa05143   |
| 296 | GO:0071456 |
| 297 | GO:0030838 |
| 298 | GO:0003823 |
| 299 | GO:0070670 |
| 300 | GO:0007565 |
| 301 | GO:0032732 |
| 302 | GO:0070434 |
| 303 | GO:0016046 |
| 304 | GO:0070430 |
| 305 | GO:0060265 |
| 306 | GO:0030895 |
| 307 | GO:0006649 |
| 308 | GO:0060229 |
| 309 | GO:0070383 |
| 310 | GO:0032490 |
| 311 | GO:0002232 |
| 312 | GO:0014056 |
| 313 | GO:0048525 |
| 314 | GO:0035624 |
| 315 | GO:0031093 |
| 316 | GO:0048010 |
| 317 | GO:0055094 |
| 318 | GO:0051873 |
| 319 | GO:0043154 |
| 320 | GO:0015643 |
| 321 | hsa05219   |
| 322 | GO:0001763 |
| 323 | GO:0048864 |
| 324 | GO:0042092 |
| 325 | GO:0002456 |
| 326 | GO:0033160 |
| 327 | GO:0050921 |
| 328 | GO:0043325 |
| 329 | GO:0010888 |
| 330 | GO:0042325 |
| 331 | GO:0051044 |
| 332 | GO:0051881 |
| 333 | GO:0046579 |
| 334 | GO:0046668 |
| 335 | GO:0034358 |
| 336 | GO:0055090 |
| 337 | GO:0010897 |



|     |            |
|-----|------------|
| 338 | GO:0051005 |
| 339 | GO:2000048 |
| 340 | GO:0050840 |
| 341 | GO:0016485 |
| 342 | GO:0035924 |
| 343 | GO:0071374 |
| 344 | GO:0046010 |
| 345 | GO:0014806 |
| 346 | hsa05416   |
| 347 | GO:0008395 |
| 348 | GO:0010700 |
| 349 | GO:0016493 |
| 350 | GO:0038084 |
| 351 | GO:0031999 |
| 352 | GO:0090197 |
| 353 | hsa05133   |
| 354 | GO:0048565 |
| 355 | GO:0004175 |
| 356 | GO:0060351 |
| 357 | GO:2001141 |
| 358 | GO:0090031 |
| 359 | GO:0060527 |
| 360 | GO:0032943 |
| 361 | GO:0032269 |
| 362 | GO:0031953 |
| 363 | GO:0003032 |
| 364 | GO:0030279 |
| 365 | GO:0051246 |
| 366 | GO:0060707 |
| 367 | GO:0002021 |
| 368 | GO:0003340 |
| 369 | GO:0090050 |
| 370 | GO:0070373 |
| 371 | GO:0034393 |
| 372 | GO:0051607 |
| 373 | GO:0051795 |
| 374 | hsa04640   |
| 375 | GO:0004517 |
| 376 | GO:0006916 |
| 377 | GO:0005520 |
| 378 | GO:0072332 |
| 379 | GO:0035458 |
| 380 | GO:0042977 |

|     |            |
|-----|------------|
| 381 | GO:0042060 |
| 382 | GO:0031663 |
| 383 | GO:0001934 |
| 384 | GO:0005585 |
| 385 | GO:0001502 |
| 386 | GO:0043410 |
| 387 | GO:2000502 |
| 388 | GO:0002062 |
| 389 | GO:0030023 |
| 390 | GO:0035684 |
| 391 | GO:0071347 |
| 392 | GO:0010544 |
| 393 | GO:0002523 |
| 394 | GO:0085029 |
| 395 | GO:0010763 |
| 396 | GO:0032878 |
| 397 | GO:0060729 |
| 398 | GO:0030235 |
| 399 | GO:0040007 |
| 400 | GO:0042612 |
| 401 | GO:0006527 |
| 402 | GO:0002480 |
| 403 | GO:0022617 |
| 404 | GO:0032374 |
| 405 | GO:0045078 |
| 406 | GO:0019882 |
| 407 | GO:0046434 |
| 408 | GO:0010759 |
| 409 | GO:0002687 |
| 410 | GO:2000121 |
| 411 | GO:0050995 |
| 412 | GO:0045084 |
| 413 | GO:0060068 |
| 414 | GO:0061035 |
| 415 | GO:0002446 |
| 416 | GO:0072308 |
| 417 | GO:0042698 |
| 418 | GO:0042770 |
| 419 | GO:0001955 |
| 420 | GO:0002384 |
| 421 | GO:0002532 |
| 422 | GO:0034145 |
| 423 | GO:0005130 |

|     |            |
|-----|------------|
| 424 | hsa04672   |
| 425 | GO:0042554 |
| 426 | GO:0042637 |
| 427 | GO:0043330 |
| 428 | GO:0070050 |
| 429 | GO:0070173 |
| 430 | GO:0031012 |
| 431 | GO:0019730 |
| 432 | GO:0032897 |
| 433 | GO:0001867 |
| 434 | GO:0034154 |
| 435 | GO:0033093 |
| 436 | GO:0005579 |
| 437 | GO:0060123 |
| 438 | GO:0004950 |
| 439 | GO:2001199 |
| 440 | GO:2000663 |
| 441 | GO:0032996 |
| 442 | GO:2000666 |
| 443 | GO:0034392 |
| 444 | GO:2000309 |
| 445 | GO:0071351 |
| 446 | GO:0044146 |
| 447 | GO:0060552 |
| 448 | GO:0044429 |
| 449 | GO:0060550 |
| 450 | GO:0044444 |
| 451 | GO:0071359 |
| 452 | GO:0005540 |
| 453 | GO:0030335 |
| 454 | GO:0014065 |
| 455 | hsa05310   |
| 456 | GO:0002430 |
| 457 | GO:0043206 |
| 458 | GO:0060087 |
| 459 | GO:0051272 |
| 460 | GO:0006917 |
| 461 | GO:0007606 |
| 462 | GO:0048407 |
| 463 | GO:0048536 |
| 464 | hsa05146   |
| 465 | GO:0071356 |
| 466 | GO:0090265 |

|     |            |
|-----|------------|
| 467 | GO:2000427 |
| 468 | GO:0031727 |
| 469 | GO:0010332 |
| 470 | GO:0043627 |
| 471 | GO:0045179 |
| 472 | GO:0043066 |
| 473 | GO:0048298 |
| 474 | GO:0051152 |
| 475 | GO:0021795 |
| 476 | GO:0050927 |
| 477 | GO:0014823 |
| 478 | GO:0051054 |
| 479 | GO:0051591 |
| 480 | GO:0010224 |
| 481 | GO:0042307 |
| 482 | GO:0042511 |
| 483 | GO:0030139 |
| 484 | GO:0045445 |
| 485 | GO:0016004 |
| 486 | GO:0035767 |
| 487 | GO:0032994 |
| 488 | GO:0005597 |
| 489 | GO:0034378 |
| 490 | GO:0008513 |
| 491 | GO:0034445 |
| 492 | GO:0034365 |
| 493 | GO:0065005 |
| 494 | GO:0045343 |
| 495 | GO:0031284 |
| 496 | GO:0071674 |
| 497 | GO:0002544 |
| 498 | GO:0032819 |
| 499 | GO:0005608 |
| 500 | GO:0034701 |

b) mRMR features list

| Rank | Feature name |
|------|--------------|
| 1    | GO:0030449   |
| 2    | GO:0046629   |
| 3    | GO:0043183   |
| 4    | hsa05150     |
| 5    | GO:0006956   |

|    |            |
|----|------------|
| 6  | GO:1900006 |
| 7  | GO:0018243 |
| 8  | GO:0002429 |
| 9  | GO:0071482 |
| 10 | GO:0048739 |
| 11 | GO:0010001 |
| 12 | hsa04610   |
| 13 | GO:0006029 |
| 14 | GO:0001970 |
| 15 | GO:0050868 |
| 16 | GO:0035645 |
| 17 | GO:0002462 |
| 18 | GO:0043184 |
| 19 | GO:0034436 |
| 20 | GO:0008228 |
| 21 | GO:0004509 |
| 22 | GO:0072563 |
| 23 | GO:0006957 |
| 24 | GO:0018242 |
| 25 | GO:0051400 |
| 26 | GO:0007603 |
| 27 | GO:0004943 |
| 28 | GO:0071953 |
| 29 | GO:0038091 |
| 30 | GO:0061302 |
| 31 | GO:0006741 |
| 32 | GO:0030214 |
| 33 | GO:0006958 |
| 34 | GO:0034437 |
| 35 | GO:0004876 |
| 36 | GO:0002042 |
| 37 | GO:0000302 |
| 38 | GO:0070206 |
| 39 | GO:0004866 |
| 40 | GO:0016495 |
| 41 | GO:0006705 |
| 42 | GO:0032994 |
| 43 | GO:0001850 |
| 44 | GO:0043537 |
| 45 | GO:0072686 |
| 46 | GO:0032463 |
| 47 | GO:0005597 |
| 48 | GO:0034405 |

|    |            |
|----|------------|
| 49 | GO:0004944 |
| 50 | GO:0031616 |
| 51 | GO:0034189 |
| 52 | GO:0051918 |
| 53 | GO:0042612 |
| 54 | GO:0090037 |
| 55 | GO:0033364 |
| 56 | GO:0050689 |
| 57 | GO:0004903 |
| 58 | GO:0008395 |
| 59 | GO:0001798 |
| 60 | GO:1900086 |
| 61 | GO:0031491 |
| 62 | GO:0001540 |
| 63 | GO:0035082 |
| 64 | GO:0000003 |
| 65 | GO:0010711 |
| 66 | GO:0010900 |
| 67 | GO:0060744 |
| 68 | GO:0006940 |
| 69 | GO:0002504 |
| 70 | GO:0060346 |
| 71 | GO:0032809 |
| 72 | GO:0034378 |
| 73 | GO:0043331 |
| 74 | GO:0051873 |
| 75 | GO:0071230 |
| 76 | GO:0030247 |
| 77 | GO:0060754 |
| 78 | GO:0042461 |
| 79 | GO:0032368 |
| 80 | GO:0060342 |
| 81 | GO:0014056 |
| 82 | GO:0032930 |
| 83 | GO:0004473 |
| 84 | GO:0010369 |
| 85 | GO:0010703 |
| 86 | GO:0070195 |
| 87 | GO:0060229 |
| 88 | GO:0043536 |
| 89 | GO:0000932 |
| 90 | GO:0060265 |
| 91 | GO:0001968 |

|     |            |
|-----|------------|
| 92  | GO:0034369 |
| 93  | GO:0034103 |
| 94  | GO:0019064 |
| 95  | GO:0005172 |
| 96  | GO:0008200 |
| 97  | GO:0051297 |
| 98  | GO:0010165 |
| 99  | GO:0005044 |
| 100 | GO:0031109 |
| 101 | GO:0006649 |
| 102 | GO:0034445 |
| 103 | GO:0003823 |
| 104 | GO:0043117 |
| 105 | GO:0033962 |
| 106 | GO:0060311 |
| 107 | GO:0051280 |
| 108 | GO:0032417 |
| 109 | GO:0009881 |
| 110 | GO:0032490 |
| 111 | GO:0019882 |
| 112 | GO:0004784 |
| 113 | GO:0034365 |
| 114 | GO:0001867 |
| 115 | GO:0014043 |
| 116 | GO:0031714 |
| 117 | GO:0065005 |
| 118 | GO:0021762 |
| 119 | GO:0072384 |
| 120 | GO:0060313 |
| 121 | GO:0090305 |
| 122 | GO:0004653 |
| 123 | GO:0042583 |
| 124 | GO:2001199 |
| 125 | GO:0001763 |
| 126 | GO:0010760 |
| 127 | GO:0038025 |
| 128 | GO:0002575 |
| 129 | GO:0002232 |
| 130 | GO:0005582 |
| 131 | GO:0014826 |
| 132 | GO:0051537 |
| 133 | GO:0003273 |
| 134 | GO:0002480 |

|     |            |
|-----|------------|
| 135 | GO:0010501 |
| 136 | GO:0071062 |
| 137 | GO:0008209 |
| 138 | GO:0045869 |
| 139 | GO:0090281 |
| 140 | GO:0060394 |
| 141 | GO:0034755 |
| 142 | GO:0030621 |
| 143 | GO:0033627 |
| 144 | GO:0060319 |
| 145 | GO:0010902 |
| 146 | GO:0035270 |
| 147 | GO:0010873 |
| 148 | GO:2001141 |
| 149 | GO:0003746 |
| 150 | GO:0010987 |
| 151 | GO:0017158 |
| 152 | GO:0014909 |
| 153 | GO:0047915 |
| 154 | GO:0034346 |
| 155 | GO:0015074 |
| 156 | GO:0050777 |
| 157 | GO:0005548 |
| 158 | GO:0035624 |
| 159 | GO:0043022 |
| 160 | GO:0043171 |
| 161 | GO:0045309 |
| 162 | GO:0034056 |
| 163 | GO:0031077 |
| 164 | GO:0043024 |
| 165 | GO:0007256 |
| 166 | GO:0004441 |
| 167 | GO:0038026 |
| 168 | GO:0051635 |
| 169 | GO:0034021 |
| 170 | GO:0006438 |
| 171 | GO:0010764 |
| 172 | GO:0010821 |
| 173 | GO:0032855 |
| 174 | GO:0019049 |
| 175 | GO:0046814 |
| 176 | GO:0060697 |
| 177 | GO:0007091 |



|     |            |
|-----|------------|
| 178 | GO:0097186 |
| 179 | GO:0071622 |
| 180 | GO:0004962 |
| 181 | GO:0072321 |
| 182 | GO:0048009 |
| 183 | GO:0005540 |
| 184 | GO:0004832 |
| 185 | GO:0043178 |
| 186 | GO:0060011 |
| 187 | GO:0034358 |
| 188 | GO:0030895 |
| 189 | GO:0006700 |
| 190 | GO:0004221 |
| 191 | GO:0042325 |
| 192 | GO:0006930 |
| 193 | GO:0032432 |
| 194 | GO:0000930 |
| 195 | GO:0030593 |
| 196 | GO:0043064 |
| 197 | GO:0003948 |
| 198 | GO:0051856 |
| 199 | GO:0038063 |
| 200 | GO:0001315 |
| 201 | GO:0009258 |
| 202 | GO:0055090 |
| 203 | GO:0019836 |
| 204 | GO:0070722 |
| 205 | GO:0070383 |
| 206 | GO:0048640 |
| 207 | GO:0030023 |
| 208 | GO:0051926 |
| 209 | GO:0031362 |
| 210 | GO:0032990 |
| 211 | GO:0001938 |
| 212 | hsa00290   |
| 213 | GO:0016619 |
| 214 | GO:0034447 |
| 215 | GO:0021858 |
| 216 | GO:0001552 |
| 217 | GO:0008347 |
| 218 | GO:0005161 |
| 219 | GO:0048525 |
| 220 | GO:0060042 |

|     |            |
|-----|------------|
| 221 | GO:0007497 |
| 222 | GO:0045423 |
| 223 | GO:0005579 |
| 224 | GO:2001028 |
| 225 | GO:0060228 |
| 226 | GO:0035417 |
| 227 | GO:0003069 |
| 228 | GO:0006122 |
| 229 | GO:0032958 |
| 230 | GO:0035845 |
| 231 | GO:0051654 |
| 232 | GO:0032387 |
| 233 | GO:0043498 |
| 234 | GO:0070173 |
| 235 | GO:0005488 |
| 236 | GO:0009409 |
| 237 | GO:0048243 |
| 238 | GO:0060123 |
| 239 | GO:0048386 |
| 240 | GO:0010510 |
| 241 | GO:0048845 |
| 242 | GO:0046434 |
| 243 | GO:0050884 |
| 244 | GO:0045414 |
| 245 | GO:0032510 |
| 246 | GO:0042310 |
| 247 | GO:0034185 |
| 248 | GO:0070050 |
| 249 | GO:0042253 |
| 250 | GO:0005198 |
| 251 | GO:0015030 |
| 252 | GO:0005072 |
| 253 | GO:0032393 |
| 254 | GO:0008390 |
| 255 | GO:0002551 |
| 256 | GO:0050655 |
| 257 | GO:0004252 |
| 258 | GO:0034605 |
| 259 | GO:0010863 |
| 260 | GO:0010700 |
| 261 | GO:0048773 |
| 262 | GO:0070287 |
| 263 | GO:0010388 |

|     |            |
|-----|------------|
| 264 | GO:0004843 |
| 265 | GO:0045103 |
| 266 | GO:0003729 |
| 267 | GO:0046548 |
| 268 | GO:2000256 |
| 269 | GO:0005876 |
| 270 | GO:0002204 |
| 271 | GO:0007606 |
| 272 | GO:0007181 |
| 273 | GO:0005608 |
| 274 | GO:0000303 |
| 275 | GO:0030949 |
| 276 | GO:0035545 |
| 277 | GO:0019730 |
| 278 | GO:0005602 |
| 279 | GO:0042660 |
| 280 | GO:0008817 |
| 281 | GO:0010716 |
| 282 | GO:0008513 |
| 283 | GO:0006809 |
| 284 | GO:0016056 |
| 285 | GO:0009236 |
| 286 | GO:0048549 |
| 287 | GO:0042159 |
| 288 | GO:0001919 |
| 289 | GO:0042231 |
| 290 | GO:0051264 |
| 291 | GO:0006527 |
| 292 | GO:0002666 |
| 293 | GO:0050840 |
| 294 | GO:0046314 |
| 295 | GO:0005534 |
| 296 | hsa05416   |
| 297 | GO:0000910 |
| 298 | GO:0006311 |
| 299 | GO:0051265 |
| 300 | GO:0042033 |
| 301 | GO:0032793 |
| 302 | GO:0034875 |
| 303 | GO:0002457 |
| 304 | GO:0030382 |
| 305 | hsa04962   |
| 306 | GO:0003747 |

|     |            |
|-----|------------|
| 307 | GO:0007080 |
| 308 | GO:0032139 |
| 309 | GO:0045618 |
| 310 | GO:0030229 |
| 311 | GO:0001300 |
| 312 | GO:0043405 |
| 313 | GO:0019835 |
| 314 | GO:0006086 |
| 315 | GO:0045541 |
| 316 | GO:0001502 |
| 317 | GO:0045116 |
| 318 | GO:0060312 |
| 319 | GO:0010916 |
| 320 | GO:0045039 |
| 321 | GO:0072332 |
| 322 | GO:0042753 |
| 323 | GO:0046649 |
| 324 | GO:0052871 |
| 325 | GO:0070052 |
| 326 | GO:0034701 |
| 327 | GO:0005930 |
| 328 | GO:0001910 |
| 329 | GO:0016209 |
| 330 | GO:0038084 |
| 331 | GO:0045179 |
| 332 | GO:0005537 |
| 333 | GO:0033141 |
| 334 | GO:0005010 |
| 335 | GO:0008428 |
| 336 | GO:0008360 |
| 337 | GO:0032996 |
| 338 | GO:0016578 |
| 339 | GO:0061035 |
| 340 | GO:0050665 |
| 341 | GO:0005585 |
| 342 | GO:0045128 |
| 343 | GO:0021517 |
| 344 | GO:0055094 |
| 345 | GO:0046605 |
| 346 | GO:0055106 |
| 347 | GO:0009597 |
| 348 | GO:0033700 |
| 349 | GO:0002729 |

|     |            |
|-----|------------|
| 350 | GO:0005462 |
| 351 | GO:0060510 |
| 352 | GO:0031012 |
| 353 | GO:0002693 |
| 354 | GO:0031576 |
| 355 | GO:0045591 |
| 356 | GO:0006168 |
| 357 | GO:0060745 |
| 358 | GO:0046599 |
| 359 | GO:0060230 |
| 360 | GO:0043330 |
| 361 | GO:0045494 |
| 362 | GO:0016272 |
| 363 | GO:0001974 |
| 364 | GO:0030497 |
| 365 | GO:0033116 |
| 366 | GO:0001957 |
| 367 | GO:0044241 |
| 368 | GO:0030279 |
| 369 | GO:0010477 |
| 370 | GO:0015788 |
| 371 | GO:0042462 |
| 372 | GO:0051651 |
| 373 | GO:0042719 |
| 374 | GO:0060707 |
| 375 | GO:0008187 |
| 376 | GO:0021772 |
| 377 | GO:0005586 |
| 378 | GO:0060128 |
| 379 | GO:2000405 |
| 380 | GO:0021885 |
| 381 | GO:0060052 |
| 382 | GO:0033188 |
| 383 | GO:0002282 |
| 384 | GO:0002430 |
| 385 | GO:0031573 |
| 386 | GO:0047493 |
| 387 | GO:0051898 |
| 388 | GO:0030145 |
| 389 | GO:0001917 |
| 390 | GO:0048306 |
| 391 | GO:0061338 |
| 392 | GO:0003340 |

|     |            |
|-----|------------|
| 393 | GO:0032805 |
| 394 | GO:0051272 |
| 395 | GO:0019509 |
| 396 | GO:1900016 |
| 397 | GO:0060351 |
| 398 | GO:0045884 |
| 399 | GO:0019543 |
| 400 | GO:0042116 |
| 401 | GO:0021678 |
| 402 | GO:0021940 |
| 403 | GO:0010826 |
| 404 | GO:0031134 |
| 405 | hsa05323   |
| 406 | GO:0031701 |
| 407 | GO:0001865 |
| 408 | GO:0019430 |
| 409 | GO:0042761 |
| 410 | GO:0060068 |
| 411 | GO:0031867 |
| 412 | GO:0060588 |
| 413 | GO:0001937 |
| 414 | GO:0032812 |
| 415 | GO:0005604 |
| 416 | GO:0010897 |
| 417 | GO:0051438 |
| 418 | GO:0001952 |
| 419 | GO:0042095 |
| 420 | GO:0071569 |
| 421 | GO:0051101 |
| 422 | GO:0003416 |
| 423 | GO:0047547 |
| 424 | GO:0010972 |
| 425 | GO:0030682 |
| 426 | GO:0016493 |
| 427 | GO:0070253 |
| 428 | GO:0046911 |
| 429 | GO:0009583 |
| 430 | GO:0070576 |
| 431 | GO:0003032 |
| 432 | GO:0003100 |
| 433 | GO:0051894 |
| 434 | GO:0051148 |
| 435 | GO:0015966 |

|     |            |
|-----|------------|
| 436 | GO:0010466 |
| 437 | GO:0001848 |
| 438 | GO:0071253 |
| 439 | GO:0042637 |
| 440 | GO:0030284 |
| 441 | GO:0006888 |
| 442 | GO:0032633 |
| 443 | GO:0015643 |
| 444 | GO:0085029 |
| 445 | GO:0046904 |
| 446 | GO:0061304 |
| 447 | GO:0050432 |
| 448 | GO:0071329 |
| 449 | GO:0042770 |
| 450 | GO:0002262 |
| 451 | GO:0051536 |
| 452 | GO:0051389 |
| 453 | GO:0030529 |
| 454 | GO:0004012 |
| 455 | GO:0034154 |
| 456 | GO:0032374 |
| 457 | GO:0071638 |
| 458 | GO:0048245 |
| 459 | GO:0030496 |
| 460 | GO:2000379 |
| 461 | GO:0019367 |
| 462 | GO:0050995 |
| 463 | GO:0048844 |
| 464 | GO:0042393 |
| 465 | GO:0034145 |
| 466 | GO:0052872 |
| 467 | GO:0090230 |
| 468 | GO:0005591 |
| 469 | GO:0072308 |
| 470 | GO:0032304 |
| 471 | GO:0043017 |
| 472 | GO:0055087 |
| 473 | GO:0050327 |
| 474 | GO:0031061 |
| 475 | GO:0032691 |
| 476 | GO:0060561 |
| 477 | GO:0045359 |
| 478 | GO:0060621 |

|     |            |
|-----|------------|
| 479 | GO:0005114 |
| 480 | GO:0060242 |
| 481 | GO:0008612 |
| 482 | GO:0060129 |
| 483 | GO:0060345 |
| 484 | GO:0033165 |
| 485 | GO:0016603 |
| 486 | GO:0032943 |
| 487 | GO:0000189 |
| 488 | GO:2000323 |
| 489 | GO:0046010 |
| 490 | GO:0016554 |
| 491 | GO:0035767 |
| 492 | GO:0006108 |
| 493 | GO:0005381 |
| 494 | GO:0016485 |
| 495 | GO:0034363 |
| 496 | GO:0030155 |
| 497 | GO:0005881 |
| 498 | GO:0032270 |
| 499 | GO:0017186 |
| 500 | GO:0004333 |

(2) Dataset  $D_2$

a) MaxRel features list

| Rank | Feature name |
|------|--------------|
| 1    | GO:0071482   |
| 2    | GO:0071953   |
| 3    | GO:0030449   |
| 4    | GO:0001970   |
| 5    | GO:0016495   |
| 6    | GO:0010711   |
| 7    | GO:0034103   |
| 8    | GO:0010703   |
| 9    | GO:0060311   |
| 10   | GO:0060313   |
| 11   | GO:0034189   |
| 12   | GO:0035645   |
| 13   | hsa05150     |
| 14   | GO:0043537   |
| 15   | GO:0051400   |
| 16   | GO:0031109   |



|    |            |
|----|------------|
| 17 | GO:0034437 |
| 18 | GO:0034436 |
| 19 | GO:0048678 |
| 20 | GO:0060342 |
| 21 | GO:0003273 |
| 22 | GO:0072563 |
| 23 | GO:0032855 |
| 24 | GO:0004962 |
| 25 | GO:0034447 |
| 26 | GO:0014043 |
| 27 | GO:0043536 |
| 28 | GO:0001315 |
| 29 | GO:0003069 |
| 30 | GO:0034021 |
| 31 | GO:0048773 |
| 32 | hsa04610   |
| 33 | GO:0032930 |
| 34 | GO:0001798 |
| 35 | GO:2001028 |
| 36 | GO:0043183 |
| 37 | GO:0004784 |
| 38 | GO:0051389 |
| 39 | GO:0032467 |
| 40 | GO:0032432 |
| 41 | GO:0038025 |
| 42 | GO:0005172 |
| 43 | GO:0060052 |
| 44 | GO:0010001 |
| 45 | GO:0045541 |
| 46 | GO:0031012 |
| 47 | GO:0004944 |
| 48 | GO:0005072 |
| 49 | GO:0021762 |
| 50 | GO:0006957 |
| 51 | GO:0043331 |
| 52 | GO:0034346 |
| 53 | GO:0048245 |
| 54 | GO:0043206 |
| 55 | GO:0000302 |
| 56 | GO:0046911 |
| 57 | GO:0032805 |
| 58 | GO:0051651 |
| 59 | GO:0042095 |

|     |            |
|-----|------------|
| 60  | GO:0001938 |
| 61  | GO:0042159 |
| 62  | GO:0000303 |
| 63  | GO:0045103 |
| 64  | GO:0002551 |
| 65  | GO:0051856 |
| 66  | GO:0060319 |
| 67  | GO:0048844 |
| 68  | GO:0042660 |
| 69  | GO:0043117 |
| 70  | GO:0002575 |
| 71  | GO:0051580 |
| 72  | GO:2000256 |
| 73  | GO:0007256 |
| 74  | GO:0042253 |
| 75  | GO:0042231 |
| 76  | GO:0014826 |
| 77  | GO:0042033 |
| 78  | GO:0010625 |
| 79  | GO:0070483 |
| 80  | GO:0044464 |
| 81  | GO:0002282 |
| 82  | GO:0050777 |
| 83  | GO:0048598 |
| 84  | GO:1900086 |
| 85  | GO:0060011 |
| 86  | hsa05323   |
| 87  | GO:0032809 |
| 88  | GO:0042088 |
| 89  | GO:0045766 |
| 90  | GO:0051142 |
| 91  | GO:0060346 |
| 92  | GO:0006956 |
| 93  | GO:0038026 |
| 94  | GO:0005615 |
| 95  | GO:0005520 |
| 96  | GO:0070371 |
| 97  | GO:0002693 |
| 98  | GO:0001910 |
| 99  | GO:0010477 |
| 100 | GO:0002457 |
| 101 | GO:0050665 |
| 102 | GO:0005586 |

|     |            |
|-----|------------|
| 103 | GO:0032488 |
| 104 | GO:0033364 |
| 105 | GO:0033141 |
| 106 | GO:0001300 |
| 107 | GO:0032700 |
| 108 | GO:0001957 |
| 109 | GO:0003084 |
| 110 | GO:0048845 |
| 111 | GO:0051894 |
| 112 | GO:0005534 |
| 113 | GO:0090031 |
| 114 | GO:1900006 |
| 115 | GO:0007603 |
| 116 | GO:0006958 |
| 117 | GO:0042612 |
| 118 | GO:0008360 |
| 119 | GO:0052033 |
| 120 | GO:0042832 |
| 121 | GO:0060020 |
| 122 | GO:0046813 |
| 123 | GO:0051898 |
| 124 | GO:0009409 |
| 125 | GO:0045429 |
| 126 | GO:0060744 |
| 127 | GO:0002042 |
| 128 | GO:0072332 |
| 129 | GO:0051918 |
| 130 | GO:0002462 |
| 131 | GO:0004943 |
| 132 | GO:0004876 |
| 133 | GO:0034185 |
| 134 | GO:0001850 |
| 135 | GO:0071222 |
| 136 | GO:0001968 |
| 137 | GO:0050921 |
| 138 | GO:0010466 |
| 139 | GO:0051881 |
| 140 | GO:0005114 |
| 141 | GO:0051607 |
| 142 | GO:0004866 |
| 143 | GO:0008395 |
| 144 | GO:0048739 |
| 145 | GO:0008209 |

|     |            |
|-----|------------|
| 146 | GO:0051000 |
| 147 | GO:0070050 |
| 148 | GO:0071346 |
| 149 | GO:0033591 |
| 150 | GO:0008228 |
| 151 | GO:0034393 |
| 152 | GO:0003032 |
| 153 | GO:0031017 |
| 154 | GO:0048246 |
| 155 | GO:0016056 |
| 156 | GO:0009583 |
| 157 | GO:0000189 |
| 158 | GO:0033160 |
| 159 | GO:0031077 |
| 160 | GO:0010760 |
| 161 | GO:0031714 |
| 162 | GO:0042461 |
| 163 | GO:0035082 |
| 164 | GO:0032784 |
| 165 | GO:0042583 |
| 166 | GO:0048251 |
| 167 | GO:0032463 |
| 168 | GO:0030229 |
| 169 | GO:0030195 |
| 170 | GO:0019430 |
| 171 | GO:0004509 |
| 172 | GO:0070633 |
| 173 | GO:0070091 |
| 174 | GO:0002384 |
| 175 | GO:0060527 |
| 176 | GO:0001895 |
| 177 | GO:0001937 |
| 178 | GO:0051712 |
| 179 | GO:0003340 |
| 180 | GO:0070301 |
| 181 | GO:0019882 |
| 182 | GO:0034363 |
| 183 | GO:0007179 |
| 184 | GO:0032757 |
| 185 | GO:0017158 |
| 186 | GO:0019836 |
| 187 | GO:0030214 |
| 188 | GO:0002262 |

|     |            |
|-----|------------|
| 189 | GO:0009441 |
| 190 | GO:0014896 |
| 191 | GO:0014904 |
| 192 | GO:0033081 |
| 193 | GO:0043498 |
| 194 | GO:0007568 |
| 195 | GO:0032958 |
| 196 | GO:0048386 |
| 197 | GO:0021940 |
| 198 | GO:0046620 |
| 199 | GO:0005010 |
| 200 | GO:0030023 |
| 201 | GO:0006029 |
| 202 | GO:0032816 |
| 203 | GO:0006917 |
| 204 | GO:0060745 |
| 205 | GO:0005579 |
| 206 | GO:0055087 |
| 207 | GO:0004906 |
| 208 | GO:0002429 |
| 209 | GO:0046629 |
| 210 | GO:0035630 |
| 211 | GO:0010763 |
| 212 | GO:0016942 |
| 213 | GO:0060510 |
| 214 | GO:0001781 |
| 215 | GO:0008090 |
| 216 | GO:0043200 |
| 217 | GO:0085029 |
| 218 | GO:0046716 |
| 219 | GO:0030516 |
| 220 | GO:0006801 |
| 221 | GO:0042060 |
| 222 | GO:0009597 |
| 223 | GO:0043381 |
| 224 | GO:0032003 |
| 225 | GO:0052871 |
| 226 | GO:0070524 |
| 227 | hsa05310   |
| 228 | GO:0035624 |
| 229 | GO:0048535 |
| 230 | GO:0001666 |
| 231 | GO:0015485 |

|     |            |
|-----|------------|
| 232 | GO:0010902 |
| 233 | GO:0060545 |
| 234 | GO:0070926 |
| 235 | GO:0060552 |
| 236 | GO:2000309 |
| 237 | GO:0060550 |
| 238 | GO:0071351 |
| 239 | GO:0044146 |
| 240 | GO:0060509 |
| 241 | GO:0004950 |
| 242 | GO:0007181 |
| 243 | GO:0033299 |
| 244 | GO:0048661 |
| 245 | GO:0043171 |
| 246 | GO:0021517 |
| 247 | GO:0031798 |
| 248 | GO:0072308 |
| 249 | GO:0038052 |
| 250 | GO:0030346 |
| 251 | GO:0006700 |
| 252 | GO:0045348 |
| 253 | GO:0010764 |
| 254 | GO:0032387 |
| 255 | GO:0004473 |
| 256 | GO:0006741 |
| 257 | GO:0030838 |
| 258 | GO:0010165 |
| 259 | GO:0002523 |
| 260 | hsa05416   |
| 261 | GO:0036094 |
| 262 | GO:0042310 |
| 263 | GO:0001974 |
| 264 | GO:0045188 |
| 265 | GO:0042094 |
| 266 | GO:0042056 |
| 267 | GO:0010224 |
| 268 | GO:0031701 |
| 269 | GO:0032691 |
| 270 | GO:0001569 |
| 271 | GO:0030235 |
| 272 | GO:0070430 |
| 273 | GO:0045079 |
| 274 | GO:0032732 |

|     |            |
|-----|------------|
| 275 | GO:0070434 |
| 276 | GO:0016046 |
| 277 | GO:0072606 |
| 278 | GO:0060229 |
| 279 | GO:0070383 |
| 280 | GO:0071253 |
| 281 | GO:0022617 |
| 282 | GO:0006935 |
| 283 | GO:0070373 |
| 284 | GO:0045906 |
| 285 | GO:0050927 |
| 286 | GO:0035767 |
| 287 | GO:0043154 |
| 288 | GO:0042092 |
| 289 | GO:0071356 |
| 290 | GO:0051098 |
| 291 | GO:0009408 |
| 292 | GO:0090037 |
| 293 | GO:0007497 |
| 294 | GO:0002021 |
| 295 | GO:0002291 |
| 296 | GO:0060087 |
| 297 | GO:0010951 |
| 298 | GO:0034358 |
| 299 | GO:0060697 |
| 300 | GO:0055090 |
| 301 | GO:0019064 |
| 302 | GO:0005578 |
| 303 | GO:0071360 |
| 304 | GO:0060228 |
| 305 | GO:0005178 |
| 306 | GO:0005576 |
| 307 | GO:0042511 |
| 308 | GO:0035684 |
| 309 | GO:0005548 |
| 310 | GO:0010544 |
| 311 | GO:0010332 |
| 312 | GO:2000502 |
| 313 | GO:0008061 |
| 314 | GO:0010700 |
| 315 | GO:0032510 |
| 316 | GO:0060561 |
| 317 | GO:0010863 |

|     |            |
|-----|------------|
| 318 | GO:0071813 |
| 319 | GO:0032497 |
| 320 | GO:0060394 |
| 321 | GO:0042325 |
| 322 | GO:0045109 |
| 323 | GO:0043388 |
| 324 | GO:0051246 |
| 325 | GO:0060740 |
| 326 | GO:0046688 |
| 327 | GO:0060137 |
| 328 | GO:0031102 |
| 329 | GO:0070326 |
| 330 | GO:0035924 |
| 331 | GO:0060351 |
| 332 | GO:0048009 |
| 333 | GO:0002446 |
| 334 | GO:0055093 |
| 335 | GO:0014012 |
| 336 | GO:0060068 |
| 337 | GO:0051054 |
| 338 | GO:0060763 |
| 339 | GO:0051045 |
| 340 | GO:0015643 |
| 341 | GO:0006290 |
| 342 | GO:0019835 |
| 343 | GO:0051873 |
| 344 | GO:0031093 |
| 345 | GO:0001540 |
| 346 | GO:0010512 |
| 347 | GO:0019049 |
| 348 | GO:0035458 |
| 349 | GO:0048407 |
| 350 | GO:0007183 |
| 351 | GO:0032332 |
| 352 | hsa05146   |
| 353 | GO:0005125 |
| 354 | GO:0006704 |
| 355 | GO:0031663 |
| 356 | GO:0007184 |
| 357 | GO:0030595 |
| 358 | GO:0038091 |
| 359 | GO:0031953 |
| 360 | GO:0030279 |



|     |            |
|-----|------------|
| 361 | GO:0045742 |
| 362 | GO:0060750 |
| 363 | GO:0051280 |
| 364 | GO:0005896 |
| 365 | GO:0060754 |
| 366 | GO:0048549 |
| 367 | GO:0002756 |
| 368 | GO:0072255 |
| 369 | GO:0072126 |
| 370 | GO:0031232 |
| 371 | GO:0045869 |
| 372 | GO:0042554 |
| 373 | GO:2000591 |
| 374 | GO:0072264 |
| 375 | GO:0035663 |
| 376 | GO:2000340 |
| 377 | GO:0032738 |
| 378 | GO:0035665 |
| 379 | GO:0035662 |
| 380 | GO:0010875 |
| 381 | GO:0010804 |
| 382 | GO:0030308 |
| 383 | GO:0009314 |
| 384 | GO:0060047 |
| 385 | GO:0002218 |
| 386 | GO:0014911 |
| 387 | GO:0060312 |
| 388 | GO:0007565 |
| 389 | GO:0007569 |
| 390 | hsa05133   |
| 391 | GO:0060559 |
| 392 | GO:0009817 |
| 393 | GO:0002513 |
| 394 | GO:0060751 |
| 395 | GO:0002460 |
| 396 | GO:1900126 |
| 397 | GO:0034056 |
| 398 | GO:0048185 |
| 399 | GO:0034188 |
| 400 | GO:0030199 |
| 401 | GO:0038027 |
| 402 | GO:0002790 |
| 403 | GO:0005581 |

|     |            |
|-----|------------|
| 404 | GO:0070173 |
| 405 | GO:0034382 |
| 406 | GO:0002504 |
| 407 | GO:0034141 |
| 408 | GO:0001848 |
| 409 | GO:0042627 |
| 410 | GO:0034137 |
| 411 | GO:0032269 |
| 412 | GO:0032417 |
| 413 | GO:0010718 |
| 414 | GO:0014065 |
| 415 | GO:0008201 |
| 416 | GO:0030512 |
| 417 | GO:0014834 |
| 418 | GO:0061045 |
| 419 | GO:0060591 |
| 420 | GO:0043066 |
| 421 | hsa05142   |
| 422 | GO:0090265 |
| 423 | GO:0007263 |
| 424 | GO:0010716 |
| 425 | GO:0034616 |
| 426 | GO:0032494 |
| 427 | GO:0010940 |
| 428 | GO:0061302 |
| 429 | GO:0007021 |
| 430 | GO:0030949 |
| 431 | GO:0048146 |
| 432 | GO:0031727 |
| 433 | GO:0031702 |
| 434 | GO:0002227 |
| 435 | GO:0030879 |
| 436 | GO:0010742 |
| 437 | GO:0060644 |
| 438 | GO:0030247 |
| 439 | GO:0070022 |
| 440 | GO:0051152 |
| 441 | GO:0042698 |
| 442 | GO:0051271 |
| 443 | GO:0046907 |
| 444 | GO:0006940 |
| 445 | GO:0033627 |
| 446 | GO:0045084 |

|     |            |
|-----|------------|
| 447 | GO:0000254 |
| 448 | GO:0034365 |
| 449 | GO:0016554 |
| 450 | GO:0033781 |
| 451 | GO:0032994 |
| 452 | GO:0034445 |
| 453 | GO:0031616 |
| 454 | GO:0051262 |
| 455 | GO:0001917 |
| 456 | GO:0015920 |
| 457 | GO:0071638 |
| 458 | GO:0030169 |
| 459 | GO:0051216 |
| 460 | GO:0070098 |
| 461 | GO:0007250 |
| 462 | GO:0040007 |
| 463 | GO:0015811 |
| 464 | GO:0015184 |
| 465 | GO:2000349 |
| 466 | GO:0048525 |
| 467 | GO:0035519 |
| 468 | GO:0070429 |
| 469 | GO:0061043 |
| 470 | GO:0002033 |
| 471 | GO:0034148 |
| 472 | GO:0030895 |
| 473 | GO:0070433 |
| 474 | GO:0001730 |
| 475 | GO:0045824 |
| 476 | GO:0072573 |
| 477 | GO:0034392 |
| 478 | GO:0008089 |
| 479 | GO:0002302 |
| 480 | hsa05164   |
| 481 | GO:0009611 |
| 482 | GO:0005539 |
| 483 | GO:0050829 |
| 484 | GO:0033145 |
| 485 | GO:0007435 |
| 486 | GO:0005584 |
| 487 | GO:0050795 |
| 488 | GO:0030185 |
| 489 | GO:0032496 |

|     |            |
|-----|------------|
| 490 | GO:0030828 |
| 491 | GO:0070886 |
| 492 | GO:0005006 |
| 493 | GO:0022009 |
| 494 | GO:0019934 |
| 495 | GO:0010759 |
| 496 | GO:0051044 |
| 497 | GO:0051926 |
| 498 | GO:0004525 |
| 499 | GO:0002035 |
| 500 | GO:0045953 |

b) mRMR features list

| Rank | Feature name |
|------|--------------|
| 1    | GO:0071482   |
| 2    | GO:0043537   |
| 3    | hsa05150     |
| 4    | GO:0042612   |
| 5    | GO:0034189   |
| 6    | GO:0030449   |
| 7    | GO:0048739   |
| 8    | GO:0008395   |
| 9    | GO:0071953   |
| 10   | GO:0050777   |
| 11   | GO:0060052   |
| 12   | GO:0031012   |
| 13   | GO:0001970   |
| 14   | GO:0070524   |
| 15   | GO:0031616   |
| 16   | GO:0016495   |
| 17   | GO:0007603   |
| 18   | GO:2001028   |
| 19   | hsa04610     |
| 20   | GO:0002429   |
| 21   | GO:0035645   |
| 22   | GO:0060744   |
| 23   | GO:0010711   |
| 24   | GO:0004509   |
| 25   | GO:0051683   |
| 26   | GO:0051400   |
| 27   | GO:0006957   |
| 28   | GO:0072563   |
| 29   | GO:0019882   |

|    |            |
|----|------------|
| 30 | GO:0042461 |
| 31 | GO:0034103 |
| 32 | GO:0060229 |
| 33 | GO:0005586 |
| 34 | GO:0006956 |
| 35 | GO:0051894 |
| 36 | GO:0070050 |
| 37 | GO:0004944 |
| 38 | GO:0048678 |
| 39 | GO:0048535 |
| 40 | GO:0010703 |
| 41 | GO:0055087 |
| 42 | GO:0005520 |
| 43 | GO:0043022 |
| 44 | GO:0033364 |
| 45 | GO:0060342 |
| 46 | GO:0035082 |
| 47 | GO:0034437 |
| 48 | GO:0046629 |
| 49 | GO:0005172 |
| 50 | GO:0060311 |
| 51 | GO:0072606 |
| 52 | GO:0010001 |
| 53 | GO:0042490 |
| 54 | GO:0008228 |
| 55 | GO:0001315 |
| 56 | GO:0004906 |
| 57 | GO:0032930 |
| 58 | GO:0014826 |
| 59 | GO:0015485 |
| 60 | GO:0060313 |
| 61 | GO:0004866 |
| 62 | GO:0000254 |
| 63 | GO:0060011 |
| 64 | GO:0007179 |
| 65 | GO:0001798 |
| 66 | GO:0004962 |
| 67 | GO:0002462 |
| 68 | GO:0038063 |
| 69 | GO:0030023 |
| 70 | GO:0032463 |
| 71 | GO:0034447 |
| 72 | GO:0031362 |

|     |            |
|-----|------------|
| 73  | GO:0043405 |
| 74  | GO:0060319 |
| 75  | GO:0031109 |
| 76  | GO:0070584 |
| 77  | GO:0060346 |
| 78  | GO:0010760 |
| 79  | GO:0032855 |
| 80  | GO:0031701 |
| 81  | GO:0034365 |
| 82  | GO:0000003 |
| 83  | GO:0005114 |
| 84  | GO:0006958 |
| 85  | GO:0003069 |
| 86  | GO:0004943 |
| 87  | GO:0043206 |
| 88  | GO:0002504 |
| 89  | GO:0048598 |
| 90  | GO:0072384 |
| 91  | GO:0038025 |
| 92  | GO:0043381 |
| 93  | GO:0016554 |
| 94  | GO:0004473 |
| 95  | GO:0070633 |
| 96  | GO:0031714 |
| 97  | GO:0032003 |
| 98  | GO:0085029 |
| 99  | GO:0000302 |
| 100 | GO:0032994 |
| 101 | GO:0003273 |
| 102 | GO:0032691 |
| 103 | GO:0034436 |
| 104 | GO:0006741 |
| 105 | GO:0005581 |
| 106 | GO:0021678 |
| 107 | GO:0014043 |
| 108 | GO:0034445 |
| 109 | GO:0004876 |
| 110 | GO:0034021 |
| 111 | GO:0007183 |
| 112 | GO:0017158 |
| 113 | GO:0043117 |
| 114 | GO:0072686 |
| 115 | GO:0007181 |

|     |            |
|-----|------------|
| 116 | GO:0043024 |
| 117 | GO:0043331 |
| 118 | GO:0006029 |
| 119 | GO:0042583 |
| 120 | GO:0001850 |
| 121 | GO:0043171 |
| 122 | GO:0045103 |
| 123 | GO:0010821 |
| 124 | GO:0042159 |
| 125 | GO:0052871 |
| 126 | GO:0043183 |
| 127 | GO:0035624 |
| 128 | GO:0048773 |
| 129 | GO:0000268 |
| 130 | GO:0051918 |
| 131 | GO:0015811 |
| 132 | GO:0007184 |
| 133 | GO:0090281 |
| 134 | GO:0038026 |
| 135 | GO:0043536 |
| 136 | GO:0016056 |
| 137 | GO:0000152 |
| 138 | GO:0006704 |
| 139 | GO:0072332 |
| 140 | GO:0051873 |
| 141 | GO:0051389 |
| 142 | GO:0071253 |
| 143 | GO:0015184 |
| 144 | GO:0033299 |
| 145 | GO:0004784 |
| 146 | GO:0071472 |
| 147 | GO:0035767 |
| 148 | GO:0007256 |
| 149 | GO:0019799 |
| 150 | GO:0001957 |
| 151 | GO:0010826 |
| 152 | GO:0033781 |
| 153 | GO:0032809 |
| 154 | GO:0005488 |
| 155 | GO:0051607 |
| 156 | GO:1900086 |
| 157 | GO:0001917 |
| 158 | GO:0032488 |

|     |            |
|-----|------------|
| 159 | GO:0008106 |
| 160 | GO:0005579 |
| 161 | GO:0006168 |
| 162 | GO:0032467 |
| 163 | GO:0032395 |
| 164 | GO:0006700 |
| 165 | GO:0051856 |
| 166 | GO:0030950 |
| 167 | GO:0030497 |
| 168 | GO:0048245 |
| 169 | GO:1900006 |
| 170 | GO:0030185 |
| 171 | GO:0035845 |
| 172 | GO:0001968 |
| 173 | GO:0055090 |
| 174 | GO:0010466 |
| 175 | GO:0038062 |
| 176 | GO:0032432 |
| 177 | GO:0006323 |
| 178 | GO:0007063 |
| 179 | GO:0005072 |
| 180 | GO:0042310 |
| 181 | GO:0048549 |
| 182 | GO:0031077 |
| 183 | GO:0071503 |
| 184 | GO:0045541 |
| 185 | GO:0045953 |
| 186 | GO:0019835 |
| 187 | GO:0009583 |
| 188 | GO:0051881 |
| 189 | GO:0010747 |
| 190 | GO:0002551 |
| 191 | GO:0008187 |
| 192 | GO:0050921 |
| 193 | GO:0015074 |
| 194 | GO:0071622 |
| 195 | GO:0000303 |
| 196 | GO:0010902 |
| 197 | GO:0042613 |
| 198 | GO:0008209 |
| 199 | GO:0090321 |
| 200 | GO:0035254 |
| 201 | GO:0034346 |



|     |            |
|-----|------------|
| 202 | GO:0000910 |
| 203 | GO:0010923 |
| 204 | GO:0097186 |
| 205 | GO:0032784 |
| 206 | GO:0001867 |
| 207 | hsa05416   |
| 208 | GO:0032816 |
| 209 | GO:0045824 |
| 210 | GO:0010763 |
| 211 | GO:0003084 |
| 212 | GO:0035473 |
| 213 | GO:0001552 |
| 214 | GO:2001199 |
| 215 | GO:0008360 |
| 216 | GO:0034358 |
| 217 | GO:0002033 |
| 218 | hsa00450   |
| 219 | GO:0051148 |
| 220 | GO:0002575 |
| 221 | GO:0034185 |
| 222 | GO:0005537 |
| 223 | GO:0070483 |
| 224 | GO:0070206 |
| 225 | GO:0035478 |
| 226 | GO:0015079 |
| 227 | GO:0021762 |
| 228 | GO:0006108 |
| 229 | GO:0050655 |
| 230 | GO:0046599 |
| 231 | GO:0071248 |
| 232 | GO:0051098 |
| 233 | GO:0051580 |
| 234 | GO:0008817 |
| 235 | GO:0052723 |
| 236 | GO:0032417 |
| 237 | GO:0010700 |
| 238 | GO:0019064 |
| 239 | GO:0008428 |
| 240 | GO:0001537 |
| 241 | GO:0046878 |
| 242 | GO:0002042 |
| 243 | GO:0017038 |
| 244 | GO:0010369 |

|     |            |
|-----|------------|
| 245 | GO:0010625 |
| 246 | GO:0051635 |
| 247 | GO:0070173 |
| 248 | GO:0003032 |
| 249 | GO:0006705 |
| 250 | GO:0060137 |
| 251 | GO:0046548 |
| 252 | GO:0034363 |
| 253 | GO:0060545 |
| 254 | GO:0090207 |
| 255 | GO:0020003 |
| 256 | hsa05323   |
| 257 | GO:0032510 |
| 258 | GO:0001895 |
| 259 | GO:2000349 |
| 260 | GO:0000832 |
| 261 | GO:0044464 |
| 262 | GO:0048025 |
| 263 | GO:0042761 |
| 264 | GO:0034393 |
| 265 | GO:0060697 |
| 266 | GO:0033591 |
| 267 | GO:0071241 |
| 268 | GO:0001561 |
| 269 | GO:0070383 |
| 270 | GO:0060527 |
| 271 | GO:0010165 |
| 272 | GO:0033116 |
| 273 | GO:0016817 |
| 274 | GO:0005534 |
| 275 | GO:0007387 |
| 276 | GO:0060510 |
| 277 | GO:0002032 |
| 278 | GO:0002282 |
| 279 | GO:0020005 |
| 280 | GO:0001730 |
| 281 | GO:0002262 |
| 282 | GO:0000293 |
| 283 | GO:0048386 |
| 284 | GO:0051271 |
| 285 | GO:0060699 |
| 286 | GO:0046911 |
| 287 | GO:0070429 |

|     |            |
|-----|------------|
| 288 | GO:0008747 |
| 289 | GO:0021509 |
| 290 | GO:0007388 |
| 291 | GO:0048844 |
| 292 | GO:0035377 |
| 293 | GO:0052724 |
| 294 | GO:0031531 |
| 295 | GO:0042660 |
| 296 | GO:0060806 |
| 297 | GO:2001051 |
| 298 | GO:0061043 |
| 299 | GO:0019262 |
| 300 | GO:0070926 |
| 301 | GO:0060068 |
| 302 | GO:0050795 |
| 303 | GO:0030184 |
| 304 | GO:0007413 |
| 305 | GO:0070371 |
| 306 | GO:0019166 |
| 307 | GO:0032805 |
| 308 | GO:0030247 |
| 309 | GO:0044314 |
| 310 | GO:0016619 |
| 311 | GO:0046813 |
| 312 | GO:0005876 |
| 313 | GO:0085018 |
| 314 | GO:0001937 |
| 315 | GO:0016603 |
| 316 | GO:0060020 |
| 317 | GO:0060123 |
| 318 | GO:0030229 |
| 319 | GO:0008630 |
| 320 | GO:0034148 |
| 321 | GO:0030199 |
| 322 | GO:0010804 |
| 323 | GO:0007606 |
| 324 | GO:0050665 |
| 325 | GO:0060047 |
| 326 | GO:0005930 |
| 327 | GO:0002523 |
| 328 | GO:0032700 |
| 329 | GO:0035378 |
| 330 | GO:0003334 |

|     |            |
|-----|------------|
| 331 | GO:0022617 |
| 332 | GO:0021772 |
| 333 | GO:0030214 |
| 334 | GO:0070433 |
| 335 | GO:0051651 |
| 336 | GO:0006601 |
| 337 | GO:0008061 |
| 338 | GO:0004470 |
| 339 | GO:0008090 |
| 340 | GO:0035379 |
| 341 | GO:0017186 |
| 342 | GO:0005041 |
| 343 | GO:0005010 |
| 344 | GO:0045964 |
| 345 | GO:0072573 |
| 346 | GO:0001848 |
| 347 | GO:0009881 |
| 348 | GO:0035519 |
| 349 | GO:0042832 |
| 350 | GO:0006931 |
| 351 | GO:0021681 |
| 352 | GO:0090031 |
| 353 | GO:0045906 |
| 354 | GO:0033145 |
| 355 | GO:0032990 |
| 356 | GO:0019049 |
| 357 | GO:0004525 |
| 358 | GO:0060228 |
| 359 | GO:0055106 |
| 360 | GO:0019836 |
| 361 | GO:0051988 |
| 362 | GO:0048845 |
| 363 | GO:0043178 |
| 364 | GO:0034122 |
| 365 | GO:0015914 |
| 366 | GO:0001938 |
| 367 | GO:0006576 |
| 368 | GO:0051782 |
| 369 | GO:0060351 |
| 370 | GO:0043064 |
| 371 | GO:0010951 |
| 372 | GO:2000256 |
| 373 | GO:0050884 |

|     |            |
|-----|------------|
| 374 | GO:0034451 |
| 375 | GO:0051224 |
| 376 | GO:0004631 |
| 377 | GO:0048251 |
| 378 | GO:0031752 |
| 379 | GO:0051142 |
| 380 | GO:0045332 |
| 381 | GO:0046814 |
| 382 | GO:0050927 |
| 383 | GO:0002480 |
| 384 | GO:0006353 |
| 385 | GO:0042325 |
| 386 | GO:0042627 |
| 387 | GO:0035455 |
| 388 | GO:0048246 |
| 389 | GO:0030279 |
| 390 | GO:0015828 |
| 391 | GO:0051898 |
| 392 | GO:0016500 |
| 393 | GO:0046907 |
| 394 | GO:0006290 |
| 395 | GO:0015643 |
| 396 | GO:0032332 |
| 397 | GO:0005302 |
| 398 | GO:0042095 |
| 399 | GO:0001578 |
| 400 | GO:0051654 |
| 401 | GO:0034140 |
| 402 | GO:0019430 |
| 403 | GO:0030169 |
| 404 | GO:0003747 |
| 405 | GO:0060394 |
| 406 | GO:0061302 |
| 407 | GO:0051345 |
| 408 | GO:0007130 |
| 409 | GO:0004950 |
| 410 | hsa01040   |
| 411 | GO:0010189 |
| 412 | GO:0042253 |
| 413 | GO:0005578 |
| 414 | GO:0010519 |
| 415 | GO:0003777 |
| 416 | GO:0046904 |

|     |            |
|-----|------------|
| 417 | GO:0005883 |
| 418 | GO:0004301 |
| 419 | GO:0005588 |
| 420 | GO:0051262 |
| 421 | GO:0042978 |
| 422 | GO:0042231 |
| 423 | GO:0036002 |
| 424 | GO:0050689 |
| 425 | GO:0021517 |
| 426 | GO:0010523 |
| 427 | GO:0002513 |
| 428 | GO:2001179 |
| 429 | GO:0035663 |
| 430 | GO:0016559 |
| 431 | GO:0060745 |
| 432 | GO:0008154 |
| 433 | GO:0038161 |
| 434 | GO:0042033 |
| 435 | GO:0032673 |
| 436 | GO:0043654 |
| 437 | GO:0006940 |
| 438 | GO:0071360 |
| 439 | GO:0032226 |
| 440 | GO:0019367 |
| 441 | GO:0051272 |
| 442 | GO:0036094 |
| 443 | GO:0009586 |
| 444 | GO:0034382 |
| 445 | GO:0031573 |
| 446 | GO:0002693 |
| 447 | GO:0030346 |
| 448 | GO:0032354 |
| 449 | GO:0030595 |
| 450 | GO:0004925 |
| 451 | GO:0031232 |
| 452 | GO:2000340 |
| 453 | GO:0031702 |
| 454 | GO:0043159 |
| 455 | GO:0001605 |
| 456 | GO:0006710 |
| 457 | GO:0045046 |
| 458 | GO:0042088 |
| 459 | GO:0044324 |

|     |            |
|-----|------------|
| 460 | GO:0070530 |
| 461 | GO:0071329 |
| 462 | GO:0004012 |
| 463 | GO:0006975 |
| 464 | GO:0002767 |
| 465 | GO:0061299 |
| 466 | GO:0001910 |
| 467 | GO:0070195 |
| 468 | GO:0003828 |
| 469 | GO:0032738 |
| 470 | GO:0090037 |
| 471 | GO:0043422 |
| 472 | GO:0016557 |
| 473 | GO:0005539 |
| 474 | GO:0071209 |
| 475 | GO:0071638 |
| 476 | GO:0033141 |
| 477 | hsa03013   |
| 478 | GO:0007497 |
| 479 | GO:0014056 |
| 480 | GO:0050262 |
| 481 | GO:0047547 |
| 482 | GO:0005591 |
| 483 | GO:0060750 |
| 484 | GO:0035665 |
| 485 | GO:0007527 |
| 486 | GO:0001778 |
| 487 | GO:0008299 |
| 488 | GO:0045104 |
| 489 | GO:0010477 |
| 490 | GO:0004422 |
| 491 | GO:0051438 |
| 492 | GO:0050765 |
| 493 | GO:0004903 |
| 494 | GO:0046620 |
| 495 | GO:0042752 |
| 496 | GO:0071813 |
| 497 | GO:0002820 |
| 498 | GO:0019543 |
| 499 | GO:2000402 |
| 500 | GO:0001300 |

(3) Dataset  $D_3$

a) MaxRel features list

| Rank | Feature name |
|------|--------------|
| 1    | GO:0030449   |
| 2    | GO:0071482   |
| 3    | hsa04610     |
| 4    | GO:0060342   |
| 5    | GO:0004866   |
| 6    | GO:0072563   |
| 7    | GO:0034437   |
| 8    | GO:0034436   |
| 9    | GO:0043537   |
| 10   | hsa05150     |
| 11   | GO:0003273   |
| 12   | GO:0043536   |
| 13   | GO:2001028   |
| 14   | GO:0006956   |
| 15   | GO:0010466   |
| 16   | GO:0034189   |
| 17   | GO:0048845   |
| 18   | GO:0002575   |
| 19   | GO:0048844   |
| 20   | GO:0032757   |
| 21   | GO:0043183   |
| 22   | GO:0016495   |
| 23   | GO:0035645   |
| 24   | GO:0042088   |
| 25   | GO:0034447   |
| 26   | GO:0051389   |
| 27   | GO:0071953   |
| 28   | GO:0001300   |
| 29   | GO:0001970   |
| 30   | GO:0021762   |
| 31   | GO:0005172   |
| 32   | GO:0004962   |
| 33   | GO:0070483   |
| 34   | GO:0031012   |
| 35   | GO:0045359   |
| 36   | GO:0002282   |
| 37   | GO:0031077   |
| 38   | GO:0043117   |
| 39   | GO:0038025   |
| 40   | GO:0005010   |
| 41   | GO:0042660   |



|    |            |
|----|------------|
| 42 | GO:0005072 |
| 43 | hsa05323   |
| 44 | GO:0032467 |
| 45 | GO:0043171 |
| 46 | GO:0051400 |
| 47 | GO:0032958 |
| 48 | GO:0048739 |
| 49 | GO:0034103 |
| 50 | GO:0034346 |
| 51 | GO:0042253 |
| 52 | GO:0010711 |
| 53 | GO:0060313 |
| 54 | GO:0010703 |
| 55 | GO:2000256 |
| 56 | GO:0042033 |
| 57 | GO:0042231 |
| 58 | GO:0060311 |
| 59 | GO:0001315 |
| 60 | GO:0048773 |
| 61 | GO:0003069 |
| 62 | GO:0034021 |
| 63 | GO:0005114 |
| 64 | GO:0043331 |
| 65 | GO:0071222 |
| 66 | GO:0005534 |
| 67 | GO:0010764 |
| 68 | GO:0001938 |
| 69 | GO:0014043 |
| 70 | GO:1900086 |
| 71 | GO:0061302 |
| 72 | GO:0052033 |
| 73 | GO:0010863 |
| 74 | GO:0004784 |
| 75 | GO:0000302 |
| 76 | GO:0001798 |
| 77 | GO:0002042 |
| 78 | GO:0005615 |
| 79 | GO:0001974 |
| 80 | GO:0043498 |
| 81 | GO:0001666 |
| 82 | GO:0000303 |
| 83 | GO:0042095 |
| 84 | GO:0045766 |

|     |            |
|-----|------------|
| 85  | GO:0035624 |
| 86  | GO:0051873 |
| 87  | GO:0006958 |
| 88  | GO:0060510 |
| 89  | GO:0051856 |
| 90  | GO:0035630 |
| 91  | GO:0038091 |
| 92  | GO:0061045 |
| 93  | GO:0070022 |
| 94  | GO:0045429 |
| 95  | GO:0090031 |
| 96  | hsa05146   |
| 97  | GO:0030949 |
| 98  | GO:0060011 |
| 99  | GO:0032732 |
| 100 | GO:0048009 |
| 101 | GO:0016046 |
| 102 | GO:0070434 |
| 103 | GO:0070430 |
| 104 | GO:0002537 |
| 105 | GO:0007603 |
| 106 | GO:0032497 |
| 107 | hsa04145   |
| 108 | GO:0051142 |
| 109 | GO:0031109 |
| 110 | GO:0048245 |
| 111 | GO:0009597 |
| 112 | GO:0008228 |
| 113 | GO:0032722 |
| 114 | GO:0060312 |
| 115 | GO:0043154 |
| 116 | GO:0055090 |
| 117 | GO:0006957 |
| 118 | GO:0060319 |
| 119 | GO:0060754 |
| 120 | GO:0042116 |
| 121 | GO:0002693 |
| 122 | GO:0002457 |
| 123 | GO:0010477 |
| 124 | GO:0070301 |
| 125 | GO:0001910 |
| 126 | GO:0002576 |
| 127 | GO:0005581 |

|     |            |
|-----|------------|
| 128 | GO:0034185 |
| 129 | GO:0046911 |
| 130 | GO:0051651 |
| 131 | GO:0070373 |
| 132 | GO:0032805 |
| 133 | GO:0060346 |
| 134 | GO:0042060 |
| 135 | GO:0032855 |
| 136 | GO:0046716 |
| 137 | GO:0002551 |
| 138 | GO:0002384 |
| 139 | GO:0009441 |
| 140 | GO:0014896 |
| 141 | GO:0014904 |
| 142 | GO:0043559 |
| 143 | GO:0001574 |
| 144 | GO:0010001 |
| 145 | GO:0048598 |
| 146 | GO:0033627 |
| 147 | GO:1900006 |
| 148 | GO:0043206 |
| 149 | GO:0030214 |
| 150 | GO:0070091 |
| 151 | GO:0051894 |
| 152 | GO:0002021 |
| 153 | GO:0010716 |
| 154 | GO:0045103 |
| 155 | GO:0014826 |
| 156 | GO:0060394 |
| 157 | GO:0006029 |
| 158 | GO:0005586 |
| 159 | GO:0048010 |
| 160 | hsa05133   |
| 161 | GO:0014065 |
| 162 | GO:0009583 |
| 163 | GO:0006801 |
| 164 | GO:0005576 |
| 165 | GO:0022617 |
| 166 | GO:0048407 |
| 167 | GO:0032432 |
| 168 | GO:0060729 |
| 169 | GO:0009409 |
| 170 | GO:0060509 |

|     |            |
|-----|------------|
| 171 | GO:0046813 |
| 172 | GO:0035767 |
| 173 | GO:0002262 |
| 174 | GO:0032930 |
| 175 | GO:0000189 |
| 176 | GO:0045541 |
| 177 | GO:0004473 |
| 178 | GO:0006741 |
| 179 | GO:0070633 |
| 180 | GO:0030195 |
| 181 | GO:0042056 |
| 182 | GO:0002291 |
| 183 | GO:0038052 |
| 184 | GO:0035924 |
| 185 | GO:0033081 |
| 186 | GO:0031017 |
| 187 | GO:0031798 |
| 188 | GO:0060744 |
| 189 | GO:0048678 |
| 190 | GO:0005585 |
| 191 | GO:0004252 |
| 192 | GO:0030198 |
| 193 | GO:0042832 |
| 194 | GO:0009881 |
| 195 | GO:0044464 |
| 196 | GO:0051580 |
| 197 | GO:0010625 |
| 198 | GO:0030023 |
| 199 | GO:0005604 |
| 200 | GO:0010875 |
| 201 | GO:0051918 |
| 202 | GO:0048565 |
| 203 | GO:0050665 |
| 204 | GO:0048251 |
| 205 | GO:0021940 |
| 206 | GO:0043388 |
| 207 | GO:0051000 |
| 208 | GO:0042159 |
| 209 | GO:0060129 |
| 210 | GO:0045348 |
| 211 | GO:0001569 |
| 212 | GO:0032964 |
| 213 | GO:0055093 |

|     |            |
|-----|------------|
| 214 | GO:0042637 |
| 215 | GO:0006108 |
| 216 | GO:0008209 |
| 217 | GO:0009612 |
| 218 | GO:0002429 |
| 219 | GO:0035082 |
| 220 | GO:0046629 |
| 221 | GO:0042461 |
| 222 | GO:0034358 |
| 223 | GO:0060068 |
| 224 | GO:0050921 |
| 225 | GO:0060325 |
| 226 | GO:0008083 |
| 227 | GO:0030335 |
| 228 | GO:0009586 |
| 229 | GO:0016056 |
| 230 | GO:0030199 |
| 231 | GO:0003823 |
| 232 | GO:0010951 |
| 233 | GO:0060052 |
| 234 | GO:0060527 |
| 235 | GO:0060020 |
| 236 | GO:0033141 |
| 237 | GO:0001957 |
| 238 | GO:0060128 |
| 239 | GO:0001968 |
| 240 | GO:0001955 |
| 241 | GO:0019430 |
| 242 | GO:0033160 |
| 243 | GO:0030166 |
| 244 | GO:0031953 |
| 245 | GO:0034056 |
| 246 | GO:0060351 |
| 247 | GO:0033299 |
| 248 | GO:0007181 |
| 249 | GO:0006917 |
| 250 | GO:0033691 |
| 251 | GO:0071346 |
| 252 | GO:0030229 |
| 253 | GO:0050829 |
| 254 | GO:2000366 |
| 255 | GO:0051898 |
| 256 | GO:0030284 |

|     |            |
|-----|------------|
| 257 | GO:0030235 |
| 258 | GO:0048246 |
| 259 | GO:0038026 |
| 260 | GO:0042310 |
| 261 | GO:0042094 |
| 262 | GO:0002523 |
| 263 | GO:0004943 |
| 264 | GO:0004876 |
| 265 | GO:0002462 |
| 266 | GO:0009749 |
| 267 | GO:0001850 |
| 268 | GO:0010512 |
| 269 | GO:0051607 |
| 270 | GO:0005160 |
| 271 | GO:0031093 |
| 272 | GO:0030247 |
| 273 | GO:0008090 |
| 274 | GO:0001895 |
| 275 | GO:0008360 |
| 276 | GO:0030145 |
| 277 | GO:0001937 |
| 278 | GO:0070886 |
| 279 | GO:0007568 |
| 280 | GO:0035458 |
| 281 | GO:0005578 |
| 282 | GO:0034713 |
| 283 | GO:0042612 |
| 284 | GO:0031663 |
| 285 | GO:0008236 |
| 286 | GO:0071253 |
| 287 | GO:0010189 |
| 288 | GO:0060229 |
| 289 | GO:0051262 |
| 290 | GO:0051001 |
| 291 | GO:0090037 |
| 292 | GO:0048386 |
| 293 | GO:0048864 |
| 294 | GO:0005896 |
| 295 | GO:0034392 |
| 296 | GO:0032269 |
| 297 | GO:0090050 |
| 298 | GO:0010902 |
| 299 | GO:0045725 |

|     |            |
|-----|------------|
| 300 | GO:0014910 |
| 301 | GO:0017158 |
| 302 | GO:0005537 |
| 303 | GO:0032700 |
| 304 | GO:0045906 |
| 305 | GO:0051054 |
| 306 | GO:0002446 |
| 307 | GO:0032270 |
| 308 | GO:0007497 |
| 309 | GO:0004944 |
| 310 | GO:0030593 |
| 311 | GO:0071062 |
| 312 | GO:0002218 |
| 313 | GO:0032570 |
| 314 | hsa05142   |
| 315 | GO:0032940 |
| 316 | GO:0070371 |
| 317 | GO:0046620 |
| 318 | GO:0072126 |
| 319 | GO:0006497 |
| 320 | GO:0072255 |
| 321 | GO:0016176 |
| 322 | GO:0072264 |
| 323 | GO:2000591 |
| 324 | GO:0019882 |
| 325 | GO:0003828 |
| 326 | GO:0001502 |
| 327 | GO:0070093 |
| 328 | GO:0006290 |
| 329 | GO:0032494 |
| 330 | GO:0007179 |
| 331 | GO:0033364 |
| 332 | GO:0051956 |
| 333 | GO:0033686 |
| 334 | GO:0071298 |
| 335 | GO:0009892 |
| 336 | GO:0060587 |
| 337 | GO:0005201 |
| 338 | GO:0030020 |
| 339 | GO:0009611 |
| 340 | GO:0030879 |
| 341 | GO:0050930 |
| 342 | GO:0033552 |

|     |            |
|-----|------------|
| 343 | GO:0002758 |
| 344 | hsa05143   |
| 345 | GO:0042583 |
| 346 | GO:0002687 |
| 347 | GO:0016619 |
| 348 | GO:0043200 |
| 349 | GO:0014834 |
| 350 | GO:0010763 |
| 351 | GO:0009314 |
| 352 | GO:0045188 |
| 353 | GO:0050777 |
| 354 | GO:0051280 |
| 355 | GO:0042698 |
| 356 | GO:0060591 |
| 357 | GO:0035066 |
| 358 | GO:0014909 |
| 359 | GO:0051897 |
| 360 | GO:0034505 |
| 361 | GO:0034188 |
| 362 | GO:0038027 |
| 363 | GO:0060228 |
| 364 | GO:0032089 |
| 365 | GO:0002790 |
| 366 | GO:0005518 |
| 367 | GO:0005158 |
| 368 | GO:0050679 |
| 369 | GO:0071356 |
| 370 | GO:0045084 |
| 371 | GO:0060047 |
| 372 | GO:0005161 |
| 373 | GO:0007183 |
| 374 | GO:0045630 |
| 375 | GO:0032609 |
| 376 | GO:0014823 |
| 377 | GO:0002092 |
| 378 | GO:2000288 |
| 379 | GO:0060741 |
| 380 | GO:0032878 |
| 381 | GO:0060740 |
| 382 | GO:0007569 |
| 383 | GO:0003032 |
| 384 | GO:0010936 |
| 385 | GO:0009408 |



|     |            |
|-----|------------|
| 386 | GO:0070051 |
| 387 | GO:0002430 |
| 388 | GO:0008191 |
| 389 | GO:2000098 |
| 390 | GO:0006707 |
| 391 | GO:0001540 |
| 392 | GO:0009311 |
| 393 | GO:0035491 |
| 394 | GO:0006508 |
| 395 | GO:0043017 |
| 396 | GO:0015920 |
| 397 | GO:0070887 |
| 398 | GO:0061044 |
| 399 | GO:0005548 |
| 400 | GO:0060230 |
| 401 | GO:0071258 |
| 402 | GO:0060426 |
| 403 | GO:0042307 |
| 404 | GO:0060644 |
| 405 | GO:0010595 |
| 406 | GO:0001541 |
| 407 | hsa05144   |
| 408 | GO:0042622 |
| 409 | GO:0071347 |
| 410 | GO:0014911 |
| 411 | GO:0004175 |
| 412 | GO:0050650 |
| 413 | GO:0060763 |
| 414 | GO:0010757 |
| 415 | GO:0005006 |
| 416 | GO:0048661 |
| 417 | GO:0071456 |
| 418 | GO:0005178 |
| 419 | GO:0042462 |
| 420 | GO:0050927 |
| 421 | GO:0045740 |
| 422 | GO:0051098 |
| 423 | GO:0090201 |
| 424 | GO:0072332 |
| 425 | GO:0060745 |
| 426 | GO:0006106 |
| 427 | GO:0009615 |
| 428 | GO:0055087 |

|     |            |
|-----|------------|
| 429 | GO:0035747 |
| 430 | GO:0004333 |
| 431 | GO:0010519 |
| 432 | GO:0004064 |
| 433 | GO:0045076 |
| 434 | GO:0045916 |
| 435 | GO:0001867 |
| 436 | GO:0060697 |
| 437 | GO:0072672 |
| 438 | GO:0030574 |
| 439 | GO:0001848 |
| 440 | GO:0045239 |
| 441 | GO:0019049 |
| 442 | GO:0051926 |
| 443 | GO:0042325 |
| 444 | GO:0048593 |
| 445 | GO:0031954 |
| 446 | GO:0030104 |
| 447 | GO:0032943 |
| 448 | GO:0045109 |
| 449 | GO:0060087 |
| 450 | GO:0051881 |
| 451 | GO:0002666 |
| 452 | GO:0043410 |
| 453 | GO:0005539 |
| 454 | GO:0060463 |
| 455 | GO:0010628 |
| 456 | GO:0005905 |
| 457 | GO:0007256 |
| 458 | GO:2000504 |
| 459 | GO:0035473 |
| 460 | GO:0035478 |
| 461 | GO:0017038 |
| 462 | GO:0071503 |
| 463 | GO:0090321 |
| 464 | GO:2001027 |
| 465 | GO:0005610 |
| 466 | GO:0070287 |
| 467 | GO:0032496 |
| 468 | GO:0043499 |
| 469 | GO:0002520 |
| 470 | GO:0002480 |
| 471 | GO:0032816 |

|     |            |
|-----|------------|
| 472 | GO:0051795 |
| 473 | hsa05164   |
| 474 | GO:0030512 |
| 475 | GO:0017015 |
| 476 | GO:0016942 |
| 477 | GO:0051384 |
| 478 | GO:0042535 |
| 479 | GO:0050840 |
| 480 | GO:0007565 |
| 481 | GO:0043066 |
| 482 | GO:0051591 |
| 483 | GO:0051346 |
| 484 | GO:0010873 |
| 485 | GO:0048074 |
| 486 | hsa04620   |
| 487 | GO:0002532 |
| 488 | GO:0005130 |
| 489 | GO:0006491 |
| 490 | GO:0097193 |
| 491 | GO:0032510 |
| 492 | GO:0030704 |
| 493 | GO:0060220 |
| 494 | GO:0010751 |
| 495 | GO:2000048 |
| 496 | GO:0001525 |
| 497 | GO:0040007 |
| 498 | hsa04512   |
| 499 | GO:0045494 |
| 500 | GO:0010754 |

b) mRMR features list

| Rank | Feature name |
|------|--------------|
| 1    | GO:0030449   |
| 2    | GO:2001028   |
| 3    | GO:0051873   |
| 4    | hsa04610     |
| 5    | GO:0043537   |
| 6    | GO:0071482   |
| 7    | GO:0055090   |
| 8    | GO:0006956   |
| 9    | GO:0072563   |
| 10   | GO:0048739   |
| 11   | GO:0005581   |

|    |            |
|----|------------|
| 12 | GO:0004866 |
| 13 | GO:0060342 |
| 14 | GO:0001574 |
| 15 | GO:0034437 |
| 16 | GO:0002429 |
| 17 | GO:0031012 |
| 18 | GO:0005114 |
| 19 | hsa05150   |
| 20 | GO:0010466 |
| 21 | GO:0061302 |
| 22 | GO:0006029 |
| 23 | GO:0035624 |
| 24 | GO:0043536 |
| 25 | GO:0004473 |
| 26 | GO:0034436 |
| 27 | GO:0046629 |
| 28 | GO:0007603 |
| 29 | GO:0043171 |
| 30 | GO:0048844 |
| 31 | GO:0006741 |
| 32 | GO:0003273 |
| 33 | GO:0005585 |
| 34 | GO:0008228 |
| 35 | GO:0031077 |
| 36 | GO:0030023 |
| 37 | GO:0001970 |
| 38 | GO:0060744 |
| 39 | GO:0032757 |
| 40 | GO:0005604 |
| 41 | GO:0006958 |
| 42 | GO:0071953 |
| 43 | GO:0060229 |
| 44 | GO:0035082 |
| 45 | GO:0005010 |
| 46 | GO:0005586 |
| 47 | GO:0002575 |
| 48 | GO:0042612 |
| 49 | GO:0034447 |
| 50 | GO:0008236 |
| 51 | GO:0042461 |
| 52 | GO:0048407 |
| 53 | GO:0016495 |
| 54 | GO:0005610 |

|    |            |
|----|------------|
| 55 | hsa04145   |
| 56 | GO:0001315 |
| 57 | GO:0006108 |
| 58 | GO:0006957 |
| 59 | GO:0060346 |
| 60 | GO:0034189 |
| 61 | GO:0019882 |
| 62 | GO:0048845 |
| 63 | GO:0003823 |
| 64 | GO:0043183 |
| 65 | GO:0010189 |
| 66 | GO:0060011 |
| 67 | GO:0042637 |
| 68 | GO:0070633 |
| 69 | GO:0002042 |
| 70 | GO:0032964 |
| 71 | GO:0051389 |
| 72 | GO:0005537 |
| 73 | GO:0003828 |
| 74 | GO:0072686 |
| 75 | GO:0043331 |
| 76 | GO:0034358 |
| 77 | GO:0009749 |
| 78 | GO:0043117 |
| 79 | GO:0016619 |
| 80 | GO:0035645 |
| 81 | GO:0030020 |
| 82 | GO:0004784 |
| 83 | hsa05146   |
| 84 | GO:0031362 |
| 85 | GO:0005172 |
| 86 | GO:0051262 |
| 87 | GO:0001974 |
| 88 | GO:0001798 |
| 89 | GO:0070052 |
| 90 | GO:0001867 |
| 91 | GO:0001300 |
| 92 | GO:0030199 |
| 93 | GO:0048773 |
| 94 | GO:0021762 |
| 95 | GO:0004252 |
| 96 | GO:0035473 |
| 97 | GO:0042088 |

|     |            |
|-----|------------|
| 98  | GO:0038063 |
| 99  | GO:0038025 |
| 100 | GO:0055087 |
| 101 | GO:0038091 |
| 102 | GO:0032089 |
| 103 | GO:0045494 |
| 104 | GO:0035478 |
| 105 | GO:0071253 |
| 106 | GO:0030145 |
| 107 | GO:0007181 |
| 108 | GO:0005534 |
| 109 | GO:0033691 |
| 110 | GO:0051635 |
| 111 | GO:0045359 |
| 112 | GO:0005201 |
| 113 | GO:0017038 |
| 114 | GO:1900086 |
| 115 | GO:0009583 |
| 116 | GO:0004943 |
| 117 | GO:0032467 |
| 118 | GO:0030497 |
| 119 | GO:0003069 |
| 120 | GO:0071503 |
| 121 | GO:0070483 |
| 122 | GO:0060754 |
| 123 | GO:0010763 |
| 124 | hsa05323   |
| 125 | GO:0090321 |
| 126 | GO:0008191 |
| 127 | GO:0051894 |
| 128 | GO:0004470 |
| 129 | GO:0060394 |
| 130 | GO:0004962 |
| 131 | GO:0072384 |
| 132 | GO:0000302 |
| 133 | GO:0004876 |
| 134 | GO:0034605 |
| 135 | GO:0030247 |
| 136 | GO:0070287 |
| 137 | GO:0051918 |
| 138 | GO:0002282 |
| 139 | GO:0006497 |
| 140 | GO:0005160 |

|     |            |
|-----|------------|
| 141 | GO:0032393 |
| 142 | GO:0032958 |
| 143 | GO:0005608 |
| 144 | GO:0034021 |
| 145 | GO:0009311 |
| 146 | GO:0035767 |
| 147 | GO:0043498 |
| 148 | GO:0002462 |
| 149 | GO:0010902 |
| 150 | GO:0048565 |
| 151 | GO:0031701 |
| 152 | GO:0034185 |
| 153 | GO:0033299 |
| 154 | GO:0046548 |
| 155 | GO:0051400 |
| 156 | GO:0070051 |
| 157 | GO:0045076 |
| 158 | GO:0030214 |
| 159 | GO:0034103 |
| 160 | GO:0005592 |
| 161 | GO:0042490 |
| 162 | GO:0060510 |
| 163 | GO:0001850 |
| 164 | GO:0032793 |
| 165 | GO:0005072 |
| 166 | GO:0035455 |
| 167 | GO:0009586 |
| 168 | GO:0035845 |
| 169 | GO:0014909 |
| 170 | GO:0002021 |
| 171 | GO:0048598 |
| 172 | GO:0010711 |
| 173 | GO:0021678 |
| 174 | GO:0005540 |
| 175 | GO:0012507 |
| 176 | GO:0060319 |
| 177 | GO:0010951 |
| 178 | GO:0051683 |
| 179 | GO:0034346 |
| 180 | GO:0007179 |
| 181 | GO:0005597 |
| 182 | GO:0060313 |
| 183 | GO:0010923 |

|     |            |
|-----|------------|
| 184 | GO:0060052 |
| 185 | GO:0050921 |
| 186 | GO:0043206 |
| 187 | GO:0002480 |
| 188 | GO:0046716 |
| 189 | GO:0003085 |
| 190 | hsa05133   |
| 191 | GO:0000303 |
| 192 | GO:0001502 |
| 193 | GO:0010764 |
| 194 | GO:0010983 |
| 195 | GO:0002666 |
| 196 | GO:0016056 |
| 197 | hsa04512   |
| 198 | GO:1900006 |
| 199 | GO:0060068 |
| 200 | GO:0042462 |
| 201 | GO:0034713 |
| 202 | GO:0004509 |
| 203 | GO:0010001 |
| 204 | GO:0032497 |
| 205 | GO:0097193 |
| 206 | GO:0010703 |
| 207 | GO:0015074 |
| 208 | GO:0002092 |
| 209 | GO:0010751 |
| 210 | GO:0042310 |
| 211 | GO:0033627 |
| 212 | GO:0001957 |
| 213 | GO:0006705 |
| 214 | GO:0006801 |
| 215 | GO:0055106 |
| 216 | GO:0006994 |
| 217 | GO:0060311 |
| 218 | GO:0001666 |
| 219 | GO:0006491 |
| 220 | GO:0019287 |
| 221 | GO:0010165 |
| 222 | GO:0005539 |
| 223 | GO:0048010 |
| 224 | GO:0009881 |
| 225 | GO:0010519 |
| 226 | GO:0030903 |



|     |            |
|-----|------------|
| 227 | GO:0051856 |
| 228 | GO:0006351 |
| 229 | GO:0051272 |
| 230 | GO:0035630 |
| 231 | GO:0019166 |
| 232 | GO:0006106 |
| 233 | GO:0022617 |
| 234 | GO:0010501 |
| 235 | GO:0060047 |
| 236 | GO:0042660 |
| 237 | GO:0060351 |
| 238 | GO:0050501 |
| 239 | GO:0052033 |
| 240 | GO:0010754 |
| 241 | GO:0045953 |
| 242 | GO:0090031 |
| 243 | GO:0030621 |
| 244 | GO:0010875 |
| 245 | GO:0008347 |
| 246 | GO:0004333 |
| 247 | GO:0061045 |
| 248 | GO:0001578 |
| 249 | GO:0051142 |
| 250 | GO:0007184 |
| 251 | GO:0090037 |
| 252 | GO:0072332 |
| 253 | GO:0043405 |
| 254 | GO:0035747 |
| 255 | GO:0045239 |
| 256 | GO:0032940 |
| 257 | GO:0005548 |
| 258 | GO:0048245 |
| 259 | GO:0048549 |
| 260 | GO:0046314 |
| 261 | GO:0048593 |
| 262 | GO:0071222 |
| 263 | GO:0019799 |
| 264 | GO:0010863 |
| 265 | GO:2001199 |
| 266 | GO:0032996 |
| 267 | GO:0030574 |
| 268 | GO:0038026 |
| 269 | GO:2000504 |

|     |            |
|-----|------------|
| 270 | GO:0035924 |
| 271 | GO:0042583 |
| 272 | GO:0072672 |
| 273 | GO:0042253 |
| 274 | GO:0038062 |
| 275 | GO:0006168 |
| 276 | GO:0002576 |
| 277 | GO:0002581 |
| 278 | GO:0048009 |
| 279 | GO:2001027 |
| 280 | GO:0016817 |
| 281 | GO:0042307 |
| 282 | GO:0031109 |
| 283 | GO:0045423 |
| 284 | GO:0002430 |
| 285 | GO:0060228 |
| 286 | GO:0014826 |
| 287 | GO:0030949 |
| 288 | GO:0019730 |
| 289 | GO:0060325 |
| 290 | GO:0002504 |
| 291 | GO:0005158 |
| 292 | GO:0061338 |
| 293 | GO:0031491 |
| 294 | GO:2000256 |
| 295 | GO:0006353 |
| 296 | GO:0045198 |
| 297 | GO:0017158 |
| 298 | GO:0042116 |
| 299 | GO:0051271 |
| 300 | GO:0005578 |
| 301 | GO:0009597 |
| 302 | GO:0045906 |
| 303 | GO:0034122 |
| 304 | GO:0005582 |
| 305 | GO:0043152 |
| 306 | GO:0002605 |
| 307 | GO:0004064 |
| 308 | GO:0042033 |
| 309 | GO:0001968 |
| 310 | GO:0045414 |
| 311 | GO:0014043 |
| 312 | GO:0050968 |

|     |            |
|-----|------------|
| 313 | GO:0035066 |
| 314 | GO:0035375 |
| 315 | GO:0043559 |
| 316 | GO:0050665 |
| 317 | GO:0008970 |
| 318 | GO:0005588 |
| 319 | GO:0042231 |
| 320 | GO:0060765 |
| 321 | GO:0001763 |
| 322 | GO:0003948 |
| 323 | GO:0010760 |
| 324 | GO:0043256 |
| 325 | GO:0008474 |
| 326 | GO:0050746 |
| 327 | GO:0045916 |
| 328 | GO:0014065 |
| 329 | GO:0045209 |
| 330 | GO:0033364 |
| 331 | GO:0050928 |
| 332 | GO:0033145 |
| 333 | GO:0060697 |
| 334 | GO:0060174 |
| 335 | GO:0019064 |
| 336 | GO:0004181 |
| 337 | GO:0004944 |
| 338 | GO:0007183 |
| 339 | GO:0031954 |
| 340 | GO:0070022 |
| 341 | GO:0019962 |
| 342 | GO:0034188 |
| 343 | GO:0002551 |
| 344 | GO:0035270 |
| 345 | GO:0045204 |
| 346 | GO:0016939 |
| 347 | GO:0043654 |
| 348 | GO:0071062 |
| 349 | GO:0034056 |
| 350 | GO:0047915 |
| 351 | GO:0050777 |
| 352 | GO:0031714 |
| 353 | GO:0001937 |
| 354 | GO:0060042 |
| 355 | GO:0050689 |

|     |            |
|-----|------------|
| 356 | GO:0005583 |
| 357 | GO:0034370 |
| 358 | GO:0001938 |
| 359 | GO:0004906 |
| 360 | GO:0038027 |
| 361 | GO:0001848 |
| 362 | GO:0032364 |
| 363 | GO:0045964 |
| 364 | GO:0070093 |
| 365 | hsa04974   |
| 366 | GO:0047485 |
| 367 | GO:0031953 |
| 368 | GO:0008209 |
| 369 | GO:0008241 |
| 370 | GO:0008109 |
| 371 | GO:0051098 |
| 372 | GO:0042056 |
| 373 | GO:0005813 |
| 374 | GO:0046813 |
| 375 | GO:0009258 |
| 376 | GO:0070373 |
| 377 | GO:0000003 |
| 378 | GO:0050655 |
| 379 | GO:0032510 |
| 380 | GO:0010512 |
| 381 | GO:0002790 |
| 382 | GO:0016018 |
| 383 | GO:0002262 |
| 384 | GO:0032374 |
| 385 | GO:0002687 |
| 386 | GO:0042060 |
| 387 | GO:0050819 |
| 388 | GO:0070584 |
| 389 | GO:0032930 |
| 390 | GO:0048074 |
| 391 | GO:0032432 |
| 392 | GO:0010873 |
| 393 | GO:0001552 |
| 394 | GO:0005905 |
| 395 | GO:0008373 |
| 396 | GO:0043184 |
| 397 | GO:0010936 |
| 398 | GO:0002767 |

|     |            |
|-----|------------|
| 399 | GO:0032855 |
| 400 | GO:0036117 |
| 401 | GO:0002693 |
| 402 | GO:0006869 |
| 403 | GO:0030704 |
| 404 | GO:0010070 |
| 405 | GO:0045263 |
| 406 | GO:0030229 |
| 407 | GO:0030284 |
| 408 | GO:0051101 |
| 409 | GO:0006290 |
| 410 | GO:0050930 |
| 411 | GO:0015722 |
| 412 | GO:0003417 |
| 413 | GO:0060123 |
| 414 | GO:0048147 |
| 415 | GO:0030512 |
| 416 | GO:0003032 |
| 417 | GO:0002523 |
| 418 | GO:0005930 |
| 419 | GO:0032732 |
| 420 | GO:0060220 |
| 421 | GO:0005607 |
| 422 | GO:0018298 |
| 423 | GO:0014910 |
| 424 | GO:0005615 |
| 425 | GO:0004496 |
| 426 | GO:0043570 |
| 427 | GO:0002457 |
| 428 | GO:0048306 |
| 429 | GO:0010740 |
| 430 | GO:0043388 |
| 431 | GO:0090207 |
| 432 | GO:0031093 |
| 433 | GO:0008817 |
| 434 | GO:0032722 |
| 435 | GO:0034505 |
| 436 | GO:0032691 |
| 437 | GO:0051054 |
| 438 | GO:0051956 |
| 439 | GO:0032633 |
| 440 | GO:0001895 |
| 441 | GO:0048251 |

|     |            |
|-----|------------|
| 442 | GO:0007387 |
| 443 | GO:0043499 |
| 444 | GO:0042622 |
| 445 | GO:0060129 |
| 446 | GO:0002820 |
| 447 | GO:0001865 |
| 448 | GO:0048386 |
| 449 | GO:0030198 |
| 450 | GO:0055085 |
| 451 | GO:0032816 |
| 452 | GO:0008119 |
| 453 | GO:0010477 |
| 454 | GO:0008395 |
| 455 | GO:0004175 |
| 456 | GO:0031573 |
| 457 | GO:0033686 |
| 458 | GO:0050840 |
| 459 | GO:0051898 |
| 460 | GO:0042534 |
| 461 | GO:0007388 |
| 462 | GO:0045103 |
| 463 | GO:0030108 |
| 464 | GO:0016046 |
| 465 | GO:0004525 |
| 466 | GO:0030950 |
| 467 | GO:0032269 |
| 468 | GO:0001750 |
| 469 | GO:0033081 |
| 470 | GO:0090050 |
| 471 | GO:0060448 |
| 472 | GO:0071298 |
| 473 | GO:0010917 |
| 474 | GO:0055093 |
| 475 | GO:0034369 |
| 476 | GO:0017015 |
| 477 | GO:0048664 |
| 478 | GO:0004903 |
| 479 | GO:0001910 |
| 480 | GO:0002764 |
| 481 | GO:0009409 |
| 482 | GO:0072126 |
| 483 | GO:0032368 |
| 484 | GO:0043154 |

|     |            |
|-----|------------|
| 485 | GO:0010813 |
| 486 | GO:0035458 |
| 487 | GO:0070195 |
| 488 | hsa01040   |
| 489 | GO:0070434 |
| 490 | GO:0060707 |
| 491 | GO:0001844 |
| 492 | GO:0005584 |
| 493 | GO:0010900 |
| 494 | GO:0030195 |
| 495 | GO:0042405 |
| 496 | GO:0042832 |
| 497 | GO:0003334 |
| 498 | GO:0030879 |
| 499 | GO:0001783 |
| 500 | GO:0019865 |

(4) Dataset  $D_4$

a) MaxRel features list

| Rank | Feature name |
|------|--------------|
| 1    | GO:0001970   |
| 2    | GO:0030449   |
| 3    | GO:0034436   |
| 4    | GO:0051400   |
| 5    | GO:0034437   |
| 6    | GO:0001798   |
| 7    | GO:0034189   |
| 8    | GO:0038025   |
| 9    | GO:0016495   |
| 10   | GO:0006956   |
| 11   | hsa05150     |
| 12   | GO:0072563   |
| 13   | GO:0071953   |
| 14   | hsa04610     |
| 15   | GO:1900006   |
| 16   | GO:0003273   |
| 17   | GO:0035645   |
| 18   | GO:0006957   |
| 19   | GO:0010001   |
| 20   | GO:0042088   |
| 21   | GO:0071482   |
| 22   | GO:0051389   |
| 23   | GO:0038026   |

|    |            |
|----|------------|
| 24 | GO:0001938 |
| 25 | GO:0003069 |
| 26 | GO:0048773 |
| 27 | GO:0034021 |
| 28 | GO:0001315 |
| 29 | GO:0048245 |
| 30 | GO:0031109 |
| 31 | GO:0004866 |
| 32 | GO:0045103 |
| 33 | GO:0002504 |
| 34 | GO:0001850 |
| 35 | GO:0002462 |
| 36 | GO:0004943 |
| 37 | GO:0004876 |
| 38 | GO:0021762 |
| 39 | GO:0034447 |
| 40 | GO:0014043 |
| 41 | GO:0010863 |
| 42 | GO:0043537 |
| 43 | GO:0043183 |
| 44 | GO:0002042 |
| 45 | GO:0060311 |
| 46 | GO:0034103 |
| 47 | GO:0060313 |
| 48 | GO:0010703 |
| 49 | GO:0010711 |
| 50 | GO:0032805 |
| 51 | GO:0051651 |
| 52 | GO:0046911 |
| 53 | GO:0008228 |
| 54 | GO:0090031 |
| 55 | GO:0016046 |
| 56 | GO:0032467 |
| 57 | GO:0042832 |
| 58 | GO:0070430 |
| 59 | GO:0070434 |
| 60 | GO:0032732 |
| 61 | GO:0043171 |
| 62 | GO:0005581 |
| 63 | GO:0004944 |
| 64 | GO:0043536 |
| 65 | GO:0042660 |
| 66 | GO:0048844 |



|     |            |
|-----|------------|
| 67  | GO:0001300 |
| 68  | GO:0045429 |
| 69  | GO:2001028 |
| 70  | GO:0051580 |
| 71  | GO:0032463 |
| 72  | GO:0044464 |
| 73  | GO:0034185 |
| 74  | GO:0019882 |
| 75  | GO:0010625 |
| 76  | GO:0050665 |
| 77  | hsa05133   |
| 78  | GO:0045766 |
| 79  | GO:0042613 |
| 80  | GO:0031012 |
| 81  | GO:0043206 |
| 82  | GO:0032958 |
| 83  | GO:0005172 |
| 84  | GO:0060342 |
| 85  | GO:0002537 |
| 86  | GO:0004962 |
| 87  | GO:0032432 |
| 88  | GO:0032809 |
| 89  | GO:0060394 |
| 90  | GO:0005072 |
| 91  | GO:0031714 |
| 92  | GO:0010760 |
| 93  | GO:0035924 |
| 94  | GO:0030949 |
| 95  | GO:0004784 |
| 96  | GO:0032700 |
| 97  | GO:0033627 |
| 98  | GO:0051918 |
| 99  | GO:0005586 |
| 100 | GO:0051856 |
| 101 | GO:0032930 |
| 102 | GO:0046813 |
| 103 | GO:0043498 |
| 104 | GO:0030195 |
| 105 | GO:0070483 |
| 106 | GO:0071346 |
| 107 | GO:0034346 |
| 108 | GO:0048407 |
| 109 | GO:0000189 |

|     |            |
|-----|------------|
| 110 | GO:1900086 |
| 111 | GO:0006940 |
| 112 | GO:0019430 |
| 113 | GO:0060052 |
| 114 | GO:0010759 |
| 115 | GO:0006958 |
| 116 | GO:0035630 |
| 117 | GO:0043154 |
| 118 | GO:0007497 |
| 119 | GO:0002693 |
| 120 | GO:0001910 |
| 121 | GO:0002457 |
| 122 | GO:0060129 |
| 123 | GO:0010477 |
| 124 | GO:0002575 |
| 125 | GO:0002384 |
| 126 | GO:0001974 |
| 127 | GO:0001968 |
| 128 | GO:0000303 |
| 129 | GO:0007603 |
| 130 | GO:0042060 |
| 131 | GO:0060312 |
| 132 | GO:0048845 |
| 133 | hsa05323   |
| 134 | GO:0002523 |
| 135 | GO:0006029 |
| 136 | GO:0002551 |
| 137 | GO:0052033 |
| 138 | GO:0002282 |
| 139 | GO:0006801 |
| 140 | GO:0005615 |
| 141 | GO:0051000 |
| 142 | GO:0060754 |
| 143 | GO:0060319 |
| 144 | GO:0070091 |
| 145 | GO:0032964 |
| 146 | GO:0043200 |
| 147 | GO:0032269 |
| 148 | GO:0031017 |
| 149 | GO:0010764 |
| 150 | GO:0005201 |
| 151 | GO:0032855 |
| 152 | GO:0002021 |

|     |            |
|-----|------------|
| 153 | GO:0005534 |
| 154 | GO:0008360 |
| 155 | GO:0030247 |
| 156 | GO:0060128 |
| 157 | GO:0043331 |
| 158 | GO:0071361 |
| 159 | GO:0048678 |
| 160 | GO:0021517 |
| 161 | GO:0043117 |
| 162 | GO:0030229 |
| 163 | GO:0042583 |
| 164 | GO:0042253 |
| 165 | GO:2000256 |
| 166 | GO:0042033 |
| 167 | GO:0009597 |
| 168 | GO:0042231 |
| 169 | GO:0048010 |
| 170 | GO:0005114 |
| 171 | GO:0042095 |
| 172 | GO:0070301 |
| 173 | GO:0022614 |
| 174 | GO:0045541 |
| 175 | GO:0014904 |
| 176 | GO:0009441 |
| 177 | GO:0042116 |
| 178 | GO:0014896 |
| 179 | GO:0000302 |
| 180 | GO:0061045 |
| 181 | GO:0032757 |
| 182 | GO:0051142 |
| 183 | GO:0055093 |
| 184 | GO:0032387 |
| 185 | GO:0071222 |
| 186 | GO:0042056 |
| 187 | GO:0003032 |
| 188 | GO:0007568 |
| 189 | GO:0060763 |
| 190 | GO:0032497 |
| 191 | GO:0005161 |
| 192 | GO:0001666 |
| 193 | GO:0070670 |
| 194 | GO:0019836 |
| 195 | GO:0002429 |

|     |            |
|-----|------------|
| 196 | GO:0046629 |
| 197 | GO:0002262 |
| 198 | GO:0005010 |
| 199 | GO:0048598 |
| 200 | GO:0050777 |
| 201 | GO:0071230 |
| 202 | GO:0048246 |
| 203 | GO:0010875 |
| 204 | GO:0005178 |
| 205 | GO:0030335 |
| 206 | GO:0033364 |
| 207 | GO:0030214 |
| 208 | GO:0009409 |
| 209 | GO:0017158 |
| 210 | GO:0051898 |
| 211 | GO:0051971 |
| 212 | GO:0033141 |
| 213 | GO:0048009 |
| 214 | hsa05020   |
| 215 | GO:0009408 |
| 216 | GO:0050921 |
| 217 | GO:0001569 |
| 218 | GO:0007181 |
| 219 | GO:0032393 |
| 220 | GO:0005520 |
| 221 | GO:0009881 |
| 222 | GO:0030828 |
| 223 | GO:0032364 |
| 224 | GO:0060509 |
| 225 | GO:0060510 |
| 226 | GO:0060020 |
| 227 | GO:0060011 |
| 228 | GO:0045494 |
| 229 | GO:0032874 |
| 230 | GO:0030838 |
| 231 | GO:0034505 |
| 232 | GO:0032722 |
| 233 | GO:0050840 |
| 234 | GO:0002576 |
| 235 | GO:0006935 |
| 236 | GO:0030516 |
| 237 | GO:0001957 |
| 238 | GO:0051607 |

|     |            |
|-----|------------|
| 239 | GO:0031663 |
| 240 | GO:0061302 |
| 241 | GO:0005548 |
| 242 | GO:0045179 |
| 243 | GO:0050718 |
| 244 | GO:0050766 |
| 245 | GO:0070383 |
| 246 | GO:0071253 |
| 247 | GO:0051881 |
| 248 | GO:0060351 |
| 249 | GO:0051262 |
| 250 | GO:0070022 |
| 251 | GO:0038091 |
| 252 | GO:0004301 |
| 253 | GO:2001199 |
| 254 | GO:0032510 |
| 255 | GO:0046696 |
| 256 | GO:0014910 |
| 257 | GO:0033552 |
| 258 | hsa05143   |
| 259 | GO:0051894 |
| 260 | GO:0001937 |
| 261 | GO:0001955 |
| 262 | GO:0030023 |
| 263 | GO:0071062 |
| 264 | GO:0071347 |
| 265 | GO:0070541 |
| 266 | GO:0090197 |
| 267 | GO:0016004 |
| 268 | GO:0006700 |
| 269 | GO:0070373 |
| 270 | GO:0060729 |
| 271 | GO:0001917 |
| 272 | GO:0060426 |
| 273 | GO:0045188 |
| 274 | GO:0016209 |
| 275 | GO:0031093 |
| 276 | GO:0007250 |
| 277 | GO:0030198 |
| 278 | GO:0001869 |
| 279 | GO:0002381 |
| 280 | GO:0005579 |
| 281 | GO:0035082 |

|     |            |
|-----|------------|
| 282 | GO:0070206 |
| 283 | GO:0004252 |
| 284 | GO:0014909 |
| 285 | GO:0005576 |
| 286 | GO:0035458 |
| 287 | GO:2000502 |
| 288 | GO:0035684 |
| 289 | hsa05310   |
| 290 | GO:0032417 |
| 291 | hsa04620   |
| 292 | GO:0008209 |
| 293 | GO:0042493 |
| 294 | GO:0032609 |
| 295 | GO:0030155 |
| 296 | GO:0002758 |
| 297 | GO:0010466 |
| 298 | GO:0007256 |
| 299 | GO:2000340 |
| 300 | GO:0035665 |
| 301 | GO:0035662 |
| 302 | GO:0006741 |
| 303 | GO:0010900 |
| 304 | GO:0034369 |
| 305 | GO:0035663 |
| 306 | GO:0032738 |
| 307 | GO:0032368 |
| 308 | GO:0004509 |
| 309 | GO:2000121 |
| 310 | GO:0060346 |
| 311 | GO:0046620 |
| 312 | GO:0031953 |
| 313 | GO:0002446 |
| 314 | GO:0021940 |
| 315 | GO:0042094 |
| 316 | hsa05142   |
| 317 | hsa05146   |
| 318 | GO:0008217 |
| 319 | GO:0042311 |
| 320 | GO:0048074 |
| 321 | GO:0005130 |
| 322 | GO:0060220 |
| 323 | GO:0030704 |
| 324 | GO:0008009 |

|     |            |
|-----|------------|
| 325 | GO:0032089 |
| 326 | GO:0046330 |
| 327 | GO:0090265 |
| 328 | GO:0070093 |
| 329 | GO:0030199 |
| 330 | GO:2000427 |
| 331 | hsa05140   |
| 332 | GO:0031727 |
| 333 | GO:0002548 |
| 334 | GO:0045359 |
| 335 | GO:0043491 |
| 336 | GO:0050927 |
| 337 | GO:0051054 |
| 338 | GO:0042542 |
| 339 | GO:0030593 |
| 340 | GO:0033081 |
| 341 | GO:0060527 |
| 342 | GO:0072332 |
| 343 | GO:0032270 |
| 344 | GO:0002291 |
| 345 | GO:0001890 |
| 346 | GO:0030279 |
| 347 | GO:0010572 |
| 348 | GO:0046716 |
| 349 | GO:0014834 |
| 350 | GO:0010595 |
| 351 | GO:0001776 |
| 352 | GO:0006290 |
| 353 | GO:0051873 |
| 354 | GO:0008201 |
| 355 | GO:0035624 |
| 356 | GO:0004950 |
| 357 | GO:0022617 |
| 358 | GO:0019835 |
| 359 | GO:0002430 |
| 360 | hsa05164   |
| 361 | GO:0043017 |
| 362 | GO:0050871 |
| 363 | GO:0035988 |
| 364 | GO:0002218 |
| 365 | GO:0009611 |
| 366 | GO:0051602 |
| 367 | hsa05144   |

|     |            |
|-----|------------|
| 368 | GO:0050918 |
| 369 | GO:0048635 |
| 370 | GO:0071356 |
| 371 | GO:0070326 |
| 372 | GO:0006917 |
| 373 | GO:0048661 |
| 374 | GO:0070371 |
| 375 | GO:0045906 |
| 376 | GO:0090022 |
| 377 | GO:0002767 |
| 378 | GO:0001867 |
| 379 | GO:0019730 |
| 380 | GO:0002352 |
| 381 | GO:0004064 |
| 382 | GO:0019865 |
| 383 | GO:0034358 |
| 384 | GO:0032996 |
| 385 | GO:0048597 |
| 386 | GO:0042159 |
| 387 | GO:2000366 |
| 388 | GO:0051272 |
| 389 | GO:0043184 |
| 390 | GO:0048739 |
| 391 | GO:0034392 |
| 392 | GO:0001895 |
| 393 | GO:0022009 |
| 394 | GO:0008089 |
| 395 | GO:0005584 |
| 396 | GO:0006874 |
| 397 | GO:0006749 |
| 398 | GO:0005158 |
| 399 | GO:0009887 |
| 400 | GO:0032494 |
| 401 | GO:0005585 |
| 402 | GO:0051788 |
| 403 | GO:0002020 |
| 404 | GO:0070287 |
| 405 | GO:0070524 |
| 406 | GO:0035478 |
| 407 | GO:0090321 |
| 408 | GO:0071503 |
| 409 | GO:0060084 |
| 410 | GO:0035473 |



|     |            |
|-----|------------|
| 411 | GO:0017038 |
| 412 | GO:0043330 |
| 413 | GO:0014826 |
| 414 | GO:0045725 |
| 415 | GO:0032816 |
| 416 | GO:0007584 |
| 417 | GO:0042511 |
| 418 | GO:0008083 |
| 419 | GO:0042535 |
| 420 | GO:0043066 |
| 421 | GO:0050966 |
| 422 | GO:0005539 |
| 423 | GO:0019439 |
| 424 | GO:0060545 |
| 425 | GO:0070424 |
| 426 | GO:0070926 |
| 427 | GO:0008061 |
| 428 | GO:0034405 |
| 429 | GO:0031077 |
| 430 | GO:0015920 |
| 431 | GO:0002544 |
| 432 | GO:2000048 |
| 433 | GO:0033299 |
| 434 | GO:0008395 |
| 435 | GO:0071638 |
| 436 | GO:0032374 |
| 437 | GO:0060137 |
| 438 | GO:0034394 |
| 439 | GO:0050867 |
| 440 | GO:0045084 |
| 441 | GO:0010574 |
| 442 | GO:0019049 |
| 443 | GO:0010763 |
| 444 | GO:0051280 |
| 445 | GO:0010888 |
| 446 | GO:0030166 |
| 447 | GO:0051044 |
| 448 | GO:0060740 |
| 449 | GO:0008090 |
| 450 | GO:0045630 |
| 451 | GO:0032943 |
| 452 | GO:0032701 |
| 453 | GO:2000587 |

|     |            |
|-----|------------|
| 454 | GO:0035419 |
| 455 | GO:0002710 |
| 456 | GO:0071608 |
| 457 | GO:0070633 |
| 458 | GO:0032370 |
| 459 | GO:0038063 |
| 460 | GO:0002367 |
| 461 | GO:0032498 |
| 462 | GO:2000363 |
| 463 | GO:0005146 |
| 464 | GO:0032500 |
| 465 | GO:0046645 |
| 466 | GO:0018298 |
| 467 | GO:0043410 |
| 468 | GO:0031702 |
| 469 | GO:0007179 |
| 470 | GO:0010544 |
| 471 | GO:0007606 |
| 472 | GO:0005125 |
| 473 | GO:0009583 |
| 474 | GO:0006979 |
| 475 | GO:0030336 |
| 476 | GO:0048018 |
| 477 | GO:0004859 |
| 478 | GO:0009612 |
| 479 | GO:0016056 |
| 480 | GO:0060325 |
| 481 | GO:0051659 |
| 482 | GO:0051787 |
| 483 | GO:0030235 |
| 484 | GO:0032707 |
| 485 | GO:0045079 |
| 486 | GO:0005588 |
| 487 | GO:0048520 |
| 488 | GO:0001923 |
| 489 | GO:0034701 |
| 490 | GO:0061338 |
| 491 | GO:0006562 |
| 492 | GO:0006710 |
| 493 | GO:0072606 |
| 494 | GO:0060587 |
| 495 | GO:0009892 |
| 496 | GO:0033686 |

|     |            |
|-----|------------|
| 497 | GO:0051956 |
| 498 | GO:0034612 |
| 499 | GO:0060452 |
| 500 | GO:0071260 |

b) mRMR features list

| Rank | Feature name |
|------|--------------|
| 1    | GO:0001970   |
| 2    | GO:0006029   |
| 3    | GO:0006956   |
| 4    | GO:0051400   |
| 5    | GO:0002504   |
| 6    | GO:0034189   |
| 7    | GO:0005581   |
| 8    | GO:0030449   |
| 9    | GO:0019882   |
| 10   | GO:2001028   |
| 11   | GO:0001850   |
| 12   | GO:0034436   |
| 13   | GO:0002429   |
| 14   | GO:0071482   |
| 15   | hsa04610     |
| 16   | GO:0072563   |
| 17   | GO:0032463   |
| 18   | GO:0042613   |
| 19   | GO:0001798   |
| 20   | GO:1900006   |
| 21   | GO:0008228   |
| 22   | GO:0031012   |
| 23   | GO:0046629   |
| 24   | GO:0016495   |
| 25   | GO:0002462   |
| 26   | GO:0034437   |
| 27   | GO:0006957   |
| 28   | GO:0048407   |
| 29   | hsa05150     |
| 30   | GO:0002042   |
| 31   | GO:0060394   |
| 32   | GO:0004943   |
| 33   | GO:0005201   |
| 34   | GO:0071953   |
| 35   | GO:0004866   |
| 36   | GO:0007603   |

|    |            |
|----|------------|
| 37 | GO:0038025 |
| 38 | GO:0004876 |
| 39 | GO:0038063 |
| 40 | GO:0004301 |
| 41 | GO:0030247 |
| 42 | GO:0090031 |
| 43 | GO:0032393 |
| 44 | GO:0005586 |
| 45 | GO:0010001 |
| 46 | GO:0070524 |
| 47 | GO:0035645 |
| 48 | GO:0031714 |
| 49 | GO:0042088 |
| 50 | GO:0035082 |
| 51 | GO:0005114 |
| 52 | GO:0003069 |
| 53 | GO:0010760 |
| 54 | GO:0048739 |
| 55 | GO:0043171 |
| 56 | GO:0060052 |
| 57 | GO:0042583 |
| 58 | GO:0045494 |
| 59 | GO:0003273 |
| 60 | GO:0008395 |
| 61 | GO:0045179 |
| 62 | GO:0032089 |
| 63 | GO:0051389 |
| 64 | GO:2001199 |
| 65 | GO:0043537 |
| 66 | GO:0005588 |
| 67 | GO:0045103 |
| 68 | GO:0070287 |
| 69 | GO:0031109 |
| 70 | GO:0004509 |
| 71 | GO:0043183 |
| 72 | GO:0004944 |
| 73 | GO:0038026 |
| 74 | GO:0070206 |
| 75 | GO:0006741 |
| 76 | GO:0048773 |
| 77 | GO:0014909 |
| 78 | GO:0010863 |
| 79 | GO:0032964 |

|     |            |
|-----|------------|
| 80  | GO:0035478 |
| 81  | GO:0006958 |
| 82  | GO:0030214 |
| 83  | GO:0048245 |
| 84  | GO:0002381 |
| 85  | GO:0070584 |
| 86  | GO:0090321 |
| 87  | GO:0014043 |
| 88  | GO:0001867 |
| 89  | GO:0051918 |
| 90  | GO:0034021 |
| 91  | GO:0070424 |
| 92  | GO:0032510 |
| 93  | GO:0035924 |
| 94  | GO:0031616 |
| 95  | GO:0051873 |
| 96  | GO:0010759 |
| 97  | GO:0030023 |
| 98  | GO:0071253 |
| 99  | GO:0060311 |
| 100 | GO:0071503 |
| 101 | GO:0001968 |
| 102 | GO:0048074 |
| 103 | GO:0051262 |
| 104 | GO:0034185 |
| 105 | GO:0072686 |
| 106 | GO:0001315 |
| 107 | GO:0005585 |
| 108 | GO:0060011 |
| 109 | hsa05133   |
| 110 | GO:0035473 |
| 111 | GO:0060342 |
| 112 | GO:0002767 |
| 113 | GO:0007181 |
| 114 | GO:0034103 |
| 115 | GO:0060754 |
| 116 | GO:0042612 |
| 117 | GO:0034447 |
| 118 | GO:0051010 |
| 119 | GO:0032269 |
| 120 | GO:0017038 |
| 121 | GO:0035624 |
| 122 | GO:0033627 |

|     |            |
|-----|------------|
| 123 | GO:0005172 |
| 124 | GO:0032467 |
| 125 | GO:0010900 |
| 126 | GO:0060220 |
| 127 | GO:0042832 |
| 128 | GO:0006940 |
| 129 | GO:0050777 |
| 130 | GO:0034369 |
| 131 | GO:0043206 |
| 132 | GO:0042461 |
| 133 | GO:0050766 |
| 134 | GO:0050665 |
| 135 | GO:0030279 |
| 136 | GO:0032417 |
| 137 | GO:0060313 |
| 138 | GO:0005161 |
| 139 | GO:0010991 |
| 140 | GO:0019430 |
| 141 | GO:0070383 |
| 142 | GO:0005597 |
| 143 | GO:0030704 |
| 144 | GO:0032368 |
| 145 | GO:0048844 |
| 146 | GO:0010703 |
| 147 | GO:0019825 |
| 148 | GO:0060744 |
| 149 | GO:0010875 |
| 150 | GO:1900086 |
| 151 | GO:0004784 |
| 152 | GO:0021678 |
| 153 | GO:0004962 |
| 154 | GO:0071230 |
| 155 | GO:0032701 |
| 156 | GO:0046703 |
| 157 | GO:0002523 |
| 158 | GO:0010711 |
| 159 | GO:0019439 |
| 160 | GO:0001917 |
| 161 | GO:0005010 |
| 162 | GO:0019730 |
| 163 | GO:0001938 |
| 164 | GO:0033961 |
| 165 | GO:0047617 |

|     |            |
|-----|------------|
| 166 | GO:0050840 |
| 167 | GO:0006801 |
| 168 | GO:0046813 |
| 169 | GO:0004473 |
| 170 | GO:0002262 |
| 171 | GO:0004843 |
| 172 | GO:0051580 |
| 173 | GO:0035419 |
| 174 | GO:0043536 |
| 175 | GO:0005537 |
| 176 | GO:0016046 |
| 177 | GO:0061302 |
| 178 | GO:0032996 |
| 179 | GO:0009249 |
| 180 | GO:0060128 |
| 181 | GO:0000932 |
| 182 | GO:0051272 |
| 183 | GO:0009881 |
| 184 | GO:0060084 |
| 185 | GO:0044464 |
| 186 | GO:0055087 |
| 187 | GO:0002710 |
| 188 | GO:0070430 |
| 189 | GO:0035845 |
| 190 | GO:0006930 |
| 191 | GO:0034358 |
| 192 | GO:0007497 |
| 193 | GO:0035988 |
| 194 | GO:0002666 |
| 195 | GO:0055092 |
| 196 | GO:0032432 |
| 197 | GO:0050921 |
| 198 | GO:0071361 |
| 199 | GO:0030020 |
| 200 | GO:0004030 |
| 201 | GO:0010625 |
| 202 | GO:0038062 |
| 203 | GO:0002021 |
| 204 | GO:0031362 |
| 205 | GO:0002575 |
| 206 | GO:0034365 |
| 207 | GO:0070434 |
| 208 | GO:0071608 |

|     |            |
|-----|------------|
| 209 | GO:0033364 |
| 210 | GO:0005488 |
| 211 | GO:0060129 |
| 212 | GO:0016409 |
| 213 | GO:0005072 |
| 214 | GO:0018243 |
| 215 | GO:0005579 |
| 216 | GO:0030199 |
| 217 | GO:0032809 |
| 218 | GO:0010949 |
| 219 | GO:0002352 |
| 220 | GO:0005930 |
| 221 | GO:0019835 |
| 222 | GO:0005548 |
| 223 | GO:0032732 |
| 224 | GO:0030145 |
| 225 | GO:0003032 |
| 226 | GO:0002367 |
| 227 | GO:0045116 |
| 228 | GO:0051856 |
| 229 | GO:0007183 |
| 230 | GO:0000254 |
| 231 | GO:0060351 |
| 232 | GO:0006562 |
| 233 | GO:0030949 |
| 234 | GO:0016209 |
| 235 | hsa04974   |
| 236 | GO:0016620 |
| 237 | GO:0072332 |
| 238 | GO:0090281 |
| 239 | GO:0021762 |
| 240 | GO:0006994 |
| 241 | GO:0032498 |
| 242 | GO:0048018 |
| 243 | GO:0032805 |
| 244 | GO:0033299 |
| 245 | GO:0072606 |
| 246 | GO:0018242 |
| 247 | GO:0061338 |
| 248 | GO:0048597 |
| 249 | GO:0007184 |
| 250 | GO:0001300 |
| 251 | GO:0034445 |



|     |            |
|-----|------------|
| 252 | GO:0002430 |
| 253 | GO:0046599 |
| 254 | GO:0032364 |
| 255 | GO:0001974 |
| 256 | GO:0001578 |
| 257 | GO:0071638 |
| 258 | GO:0000506 |
| 259 | GO:0032930 |
| 260 | GO:0045796 |
| 261 | GO:0043117 |
| 262 | GO:2000363 |
| 263 | GO:0051651 |
| 264 | GO:0001750 |
| 265 | GO:0004085 |
| 266 | GO:0048845 |
| 267 | GO:0004221 |
| 268 | GO:0060123 |
| 269 | GO:0015074 |
| 270 | GO:0071346 |
| 271 | GO:0017176 |
| 272 | GO:0071062 |
| 273 | GO:0032500 |
| 274 | GO:0006108 |
| 275 | GO:0034505 |
| 276 | GO:0043331 |
| 277 | GO:0046911 |
| 278 | GO:0005462 |
| 279 | GO:0043531 |
| 280 | GO:0048598 |
| 281 | GO:2000340 |
| 282 | GO:0046359 |
| 283 | GO:0000303 |
| 284 | GO:0033145 |
| 285 | GO:0010763 |
| 286 | GO:0060319 |
| 287 | GO:0046645 |
| 288 | GO:0035665 |
| 289 | GO:0048549 |
| 290 | GO:0031953 |
| 291 | GO:0034346 |
| 292 | GO:0048306 |
| 293 | GO:0015788 |
| 294 | GO:0006705 |

|     |            |
|-----|------------|
| 295 | GO:0021517 |
| 296 | GO:0035270 |
| 297 | GO:0035662 |
| 298 | GO:0006700 |
| 299 | GO:0005158 |
| 300 | GO:0005338 |
| 301 | GO:0008209 |
| 302 | GO:0005146 |
| 303 | GO:0005520 |
| 304 | GO:0035663 |
| 305 | GO:0002315 |
| 306 | GO:0022614 |
| 307 | GO:0070052 |
| 308 | GO:0050718 |
| 309 | GO:0042311 |
| 310 | GO:0032387 |
| 311 | GO:0000910 |
| 312 | GO:0032958 |
| 313 | GO:0072488 |
| 314 | GO:0032855 |
| 315 | GO:0003823 |
| 316 | GO:0045204 |
| 317 | GO:0008194 |
| 318 | GO:0032738 |
| 319 | GO:0055070 |
| 320 | GO:0007606 |
| 321 | GO:0038091 |
| 322 | GO:0002551 |
| 323 | GO:0015780 |
| 324 | GO:0004252 |
| 325 | GO:0006710 |
| 326 | GO:0004906 |
| 327 | GO:0035630 |
| 328 | GO:0048025 |
| 329 | GO:0006749 |
| 330 | GO:0045209 |
| 331 | GO:0009893 |
| 332 | GO:0030195 |
| 333 | GO:0044242 |
| 334 | GO:0032700 |
| 335 | GO:0061299 |
| 336 | GO:0030198 |
| 337 | GO:0010466 |

|     |            |
|-----|------------|
| 338 | GO:0090022 |
| 339 | GO:0008519 |
| 340 | GO:0070483 |
| 341 | GO:0010821 |
| 342 | GO:0019049 |
| 343 | GO:0002693 |
| 344 | GO:0001574 |
| 345 | GO:0034605 |
| 346 | GO:0030229 |
| 347 | GO:0042267 |
| 348 | GO:0048010 |
| 349 | GO:0015918 |
| 350 | GO:0016254 |
| 351 | GO:0004012 |
| 352 | GO:0042660 |
| 353 | GO:0006168 |
| 354 | hsa05020   |
| 355 | GO:0005534 |
| 356 | GO:0042116 |
| 357 | GO:0032383 |
| 358 | GO:0070633 |
| 359 | GO:0030382 |
| 360 | GO:0051788 |
| 361 | GO:0016619 |
| 362 | GO:0000302 |
| 363 | GO:0001512 |
| 364 | GO:0051098 |
| 365 | GO:0002537 |
| 366 | GO:0005883 |
| 367 | GO:0002446 |
| 368 | GO:0045263 |
| 369 | GO:0004064 |
| 370 | GO:0033165 |
| 371 | GO:0008360 |
| 372 | GO:0043394 |
| 373 | GO:0051881 |
| 374 | GO:0048806 |
| 375 | GO:0044297 |
| 376 | GO:0051894 |
| 377 | GO:0045309 |
| 378 | GO:0001910 |
| 379 | GO:0006290 |
| 380 | GO:0042447 |

|     |            |
|-----|------------|
| 381 | GO:0005539 |
| 382 | GO:0004128 |
| 383 | GO:0008753 |
| 384 | GO:0030828 |
| 385 | GO:0070278 |
| 386 | GO:0009597 |
| 387 | GO:0006704 |
| 388 | GO:0043024 |
| 389 | GO:0030838 |
| 390 | GO:0071352 |
| 391 | GO:0002455 |
| 392 | GO:0031902 |
| 393 | GO:0032691 |
| 394 | GO:0055093 |
| 395 | GO:0045869 |
| 396 | GO:0070722 |
| 397 | GO:0002457 |
| 398 | GO:0005540 |
| 399 | GO:0019836 |
| 400 | GO:0046548 |
| 401 | GO:0043154 |
| 402 | GO:0090207 |
| 403 | GO:0071622 |
| 404 | GO:0001957 |
| 405 | GO:0070670 |
| 406 | GO:0007250 |
| 407 | GO:0021541 |
| 408 | GO:0001869 |
| 409 | GO:0010826 |
| 410 | GO:0045591 |
| 411 | GO:0009595 |
| 412 | GO:0042056 |
| 413 | GO:0085029 |
| 414 | GO:0010260 |
| 415 | GO:0014826 |
| 416 | GO:0045429 |
| 417 | GO:0045541 |
| 418 | GO:0031491 |
| 419 | GO:0010942 |
| 420 | GO:0043184 |
| 421 | GO:0051054 |
| 422 | GO:0045414 |
| 423 | GO:2000587 |

|     |            |
|-----|------------|
| 424 | GO:0006351 |
| 425 | GO:0010477 |
| 426 | GO:0097190 |
| 427 | GO:0032391 |
| 428 | GO:0030492 |
| 429 | GO:0010936 |
| 430 | GO:0060042 |
| 431 | GO:0009624 |
| 432 | GO:0019865 |
| 433 | GO:0032497 |
| 434 | GO:0016667 |
| 435 | GO:0032370 |
| 436 | GO:0016829 |
| 437 | GO:0043200 |
| 438 | GO:0008347 |
| 439 | GO:0003828 |
| 440 | GO:0018298 |
| 441 | GO:0045423 |
| 442 | GO:0060510 |
| 443 | GO:0019706 |
| 444 | GO:0004181 |
| 445 | hsa05323   |
| 446 | GO:0071208 |
| 447 | GO:2000870 |
| 448 | GO:0046417 |
| 449 | GO:0042060 |
| 450 | GO:0046620 |
| 451 | GO:0050689 |
| 452 | GO:0033192 |
| 453 | GO:0034014 |
| 454 | GO:0002480 |
| 455 | GO:0043498 |
| 456 | GO:0010700 |
| 457 | GO:0043654 |
| 458 | GO:0050927 |
| 459 | GO:0008187 |
| 460 | GO:0004903 |
| 461 | GO:0006537 |
| 462 | GO:0031593 |
| 463 | GO:0001923 |
| 464 | GO:0010764 |
| 465 | GO:0070266 |
| 466 | GO:0006122 |

|     |            |
|-----|------------|
| 467 | GO:0006649 |
| 468 | GO:0043618 |
| 469 | GO:0052033 |
| 470 | GO:0034041 |
| 471 | GO:0032502 |
| 472 | GO:0060279 |
| 473 | GO:0005592 |
| 474 | GO:0048246 |
| 475 | GO:0010804 |
| 476 | GO:0070195 |
| 477 | GO:0070051 |
| 478 | GO:0051148 |
| 479 | GO:0018894 |
| 480 | GO:0003951 |
| 481 | GO:0032816 |
| 482 | GO:0003334 |
| 483 | GO:0061045 |
| 484 | GO:2000116 |
| 485 | GO:0001729 |
| 486 | GO:0001937 |
| 487 | GO:0009720 |
| 488 | GO:0032793 |
| 489 | GO:0008287 |
| 490 | GO:0043491 |
| 491 | GO:0072498 |
| 492 | GO:0005178 |
| 493 | GO:0046314 |
| 494 | GO:0035767 |
| 495 | GO:0035458 |
| 496 | GO:0002005 |
| 497 | GO:0032937 |
| 498 | GO:0006516 |
| 499 | GO:0045766 |
| 500 | GO:0090240 |

(5) Dataset  $D_5$

a) MaxRel features list

| Rank | Feature name |
|------|--------------|
| 1    | GO:0043537   |
| 2    | GO:0034189   |
| 3    | GO:0030449   |
| 4    | hsa05150     |
| 5    | GO:1900006   |

|    |            |
|----|------------|
| 6  | GO:0001970 |
| 7  | GO:0071482 |
| 8  | GO:0034437 |
| 9  | GO:0034436 |
| 10 | GO:0072563 |
| 11 | GO:0038025 |
| 12 | GO:0006957 |
| 13 | GO:0071953 |
| 14 | hsa04610   |
| 15 | GO:2001028 |
| 16 | GO:0003273 |
| 17 | GO:0051400 |
| 18 | GO:0016495 |
| 19 | GO:0090031 |
| 20 | GO:0048844 |
| 21 | GO:0060342 |
| 22 | GO:0051389 |
| 23 | GO:0001968 |
| 24 | GO:0048739 |
| 25 | GO:0043536 |
| 26 | GO:0031012 |
| 27 | GO:0031109 |
| 28 | GO:0032930 |
| 29 | GO:0008228 |
| 30 | GO:0034447 |
| 31 | GO:0035645 |
| 32 | GO:0021762 |
| 33 | GO:0002042 |
| 34 | GO:0043183 |
| 35 | GO:0006956 |
| 36 | GO:0010703 |
| 37 | GO:0034103 |
| 38 | GO:0060313 |
| 39 | GO:0010711 |
| 40 | GO:0009597 |
| 41 | GO:0060311 |
| 42 | GO:0001798 |
| 43 | GO:0005615 |
| 44 | GO:0060394 |
| 45 | GO:0045766 |
| 46 | GO:0032467 |
| 47 | GO:0001938 |
| 48 | GO:0006958 |

|    |            |
|----|------------|
| 49 | GO:0046911 |
| 50 | GO:0045429 |
| 51 | GO:0051651 |
| 52 | GO:0032805 |
| 53 | GO:0010001 |
| 54 | GO:0051898 |
| 55 | GO:0032958 |
| 56 | GO:0002575 |
| 57 | GO:0001569 |
| 58 | GO:0034346 |
| 59 | GO:0030229 |
| 60 | GO:0002282 |
| 61 | GO:0032855 |
| 62 | GO:0048845 |
| 63 | GO:0070483 |
| 64 | GO:0043498 |
| 65 | GO:0061302 |
| 66 | GO:1900086 |
| 67 | GO:0014043 |
| 68 | GO:0033627 |
| 69 | GO:0048246 |
| 70 | GO:0030023 |
| 71 | GO:0001300 |
| 72 | GO:0061045 |
| 73 | GO:0051856 |
| 74 | GO:0071222 |
| 75 | hsa05323   |
| 76 | GO:0000303 |
| 77 | GO:0045103 |
| 78 | GO:0043331 |
| 79 | GO:0002551 |
| 80 | GO:0043206 |
| 81 | GO:0042159 |
| 82 | GO:0043117 |
| 83 | GO:0005172 |
| 84 | GO:0009409 |
| 85 | GO:0006940 |
| 86 | GO:0021517 |
| 87 | GO:0010759 |
| 88 | GO:0000302 |
| 89 | GO:0051000 |
| 90 | GO:0046813 |
| 91 | GO:0042095 |



|     |            |
|-----|------------|
| 92  | GO:0048598 |
| 93  | GO:0050665 |
| 94  | GO:0032757 |
| 95  | GO:0060128 |
| 96  | GO:0055093 |
| 97  | GO:0030949 |
| 98  | GO:0002446 |
| 99  | GO:0051580 |
| 100 | GO:0032463 |
| 101 | GO:0048245 |
| 102 | GO:0044464 |
| 103 | GO:0010625 |
| 104 | GO:0014904 |
| 105 | GO:0014896 |
| 106 | GO:0048251 |
| 107 | GO:0010863 |
| 108 | GO:0060020 |
| 109 | GO:0009441 |
| 110 | GO:0060754 |
| 111 | GO:0038091 |
| 112 | GO:0070371 |
| 113 | GO:0002537 |
| 114 | GO:0050777 |
| 115 | GO:0030247 |
| 116 | GO:0031093 |
| 117 | GO:0051142 |
| 118 | GO:0007603 |
| 119 | GO:0007568 |
| 120 | GO:0001957 |
| 121 | GO:0001974 |
| 122 | GO:0060129 |
| 123 | GO:0035924 |
| 124 | GO:0042660 |
| 125 | GO:0005010 |
| 126 | GO:0048678 |
| 127 | GO:0005072 |
| 128 | GO:0004866 |
| 129 | GO:0033364 |
| 130 | GO:0060319 |
| 131 | GO:0002384 |
| 132 | GO:0038026 |
| 133 | GO:0042832 |
| 134 | GO:0045359 |

|     |            |
|-----|------------|
| 135 | GO:0052033 |
| 136 | GO:0042088 |
| 137 | GO:0006029 |
| 138 | GO:0005581 |
| 139 | GO:0002457 |
| 140 | GO:0016046 |
| 141 | GO:0001910 |
| 142 | GO:0070434 |
| 143 | GO:0070430 |
| 144 | GO:0010477 |
| 145 | GO:0033160 |
| 146 | GO:0043171 |
| 147 | GO:0032732 |
| 148 | GO:0002693 |
| 149 | GO:0060527 |
| 150 | GO:0002262 |
| 151 | GO:0060591 |
| 152 | GO:0042116 |
| 153 | GO:0043184 |
| 154 | GO:0019934 |
| 155 | GO:0060011 |
| 156 | GO:0034021 |
| 157 | GO:0048773 |
| 158 | GO:0001315 |
| 159 | GO:0003069 |
| 160 | GO:0030214 |
| 161 | GO:0001937 |
| 162 | GO:0060346 |
| 163 | GO:0048009 |
| 164 | GO:0004784 |
| 165 | GO:0005534 |
| 166 | GO:0002462 |
| 167 | GO:0001850 |
| 168 | GO:0004876 |
| 169 | GO:0004943 |
| 170 | GO:0032809 |
| 171 | GO:0004962 |
| 172 | GO:2000256 |
| 173 | GO:0042231 |
| 174 | GO:0060763 |
| 175 | GO:0009881 |
| 176 | GO:0042583 |
| 177 | GO:0042253 |

|     |            |
|-----|------------|
| 178 | GO:0042033 |
| 179 | GO:0051001 |
| 180 | GO:0045541 |
| 181 | GO:0005576 |
| 182 | GO:0005178 |
| 183 | GO:0051918 |
| 184 | GO:0035988 |
| 185 | GO:0007565 |
| 186 | GO:0007179 |
| 187 | GO:0001917 |
| 188 | GO:0070091 |
| 189 | GO:0042060 |
| 190 | GO:0032964 |
| 191 | GO:0060312 |
| 192 | GO:0032497 |
| 193 | GO:0071346 |
| 194 | GO:0032432 |
| 195 | GO:0000189 |
| 196 | GO:0060744 |
| 197 | GO:0021940 |
| 198 | GO:0034405 |
| 199 | GO:0014065 |
| 200 | GO:0005201 |
| 201 | GO:0030020 |
| 202 | GO:0010764 |
| 203 | GO:0030516 |
| 204 | GO:0008209 |
| 205 | GO:0070022 |
| 206 | GO:0005578 |
| 207 | GO:0070383 |
| 208 | GO:0048635 |
| 209 | GO:0033141 |
| 210 | GO:0031017 |
| 211 | GO:0070373 |
| 212 | GO:0090037 |
| 213 | GO:0035630 |
| 214 | GO:0060509 |
| 215 | GO:0019049 |
| 216 | GO:0007183 |
| 217 | GO:0048661 |
| 218 | GO:0007256 |
| 219 | GO:0051971 |
| 220 | GO:0030279 |

|     |            |
|-----|------------|
| 221 | GO:0045348 |
| 222 | GO:0070886 |
| 223 | GO:0002291 |
| 224 | GO:0019430 |
| 225 | GO:0008360 |
| 226 | GO:0007497 |
| 227 | GO:2000121 |
| 228 | GO:0050840 |
| 229 | GO:0030168 |
| 230 | GO:0010544 |
| 231 | GO:0001666 |
| 232 | GO:0002523 |
| 233 | GO:0032488 |
| 234 | GO:0005586 |
| 235 | GO:0001781 |
| 236 | GO:0070301 |
| 237 | GO:0005896 |
| 238 | GO:0060729 |
| 239 | GO:0046668 |
| 240 | GO:0038052 |
| 241 | GO:0031798 |
| 242 | GO:0072332 |
| 243 | GO:0003416 |
| 244 | GO:0019064 |
| 245 | GO:0035082 |
| 246 | GO:0042461 |
| 247 | GO:0004944 |
| 248 | GO:0035684 |
| 249 | GO:0005585 |
| 250 | GO:0035458 |
| 251 | GO:2000502 |
| 252 | GO:0048018 |
| 253 | GO:0010740 |
| 254 | GO:0030195 |
| 255 | GO:0031077 |
| 256 | GO:0060745 |
| 257 | GO:0051712 |
| 258 | GO:0046620 |
| 259 | GO:0042622 |
| 260 | GO:0005114 |
| 261 | GO:0043066 |
| 262 | GO:0071062 |
| 263 | GO:0030336 |

|     |            |
|-----|------------|
| 264 | GO:0042511 |
| 265 | GO:0060090 |
| 266 | GO:0032510 |
| 267 | GO:0030704 |
| 268 | GO:0048074 |
| 269 | GO:0060220 |
| 270 | hsa04145   |
| 271 | GO:0045669 |
| 272 | GO:0034363 |
| 273 | GO:0017046 |
| 274 | GO:0030199 |
| 275 | GO:0030335 |
| 276 | GO:0002548 |
| 277 | GO:0050679 |
| 278 | GO:0008217 |
| 279 | GO:0048407 |
| 280 | GO:0005006 |
| 281 | GO:0019836 |
| 282 | GO:0051098 |
| 283 | GO:0070326 |
| 284 | GO:0033552 |
| 285 | GO:0002456 |
| 286 | GO:0032609 |
| 287 | GO:0090303 |
| 288 | GO:0032700 |
| 289 | GO:0060052 |
| 290 | GO:0032270 |
| 291 | GO:0043559 |
| 292 | GO:0046579 |
| 293 | GO:0060559 |
| 294 | GO:0051044 |
| 295 | GO:2000379 |
| 296 | GO:0009408 |
| 297 | GO:0034185 |
| 298 | GO:0002576 |
| 299 | GO:0030512 |
| 300 | GO:0008083 |
| 301 | GO:0008201 |
| 302 | GO:0005520 |
| 303 | GO:0030169 |
| 304 | GO:2000048 |
| 305 | GO:0045869 |
| 306 | GO:0010763 |

|     |            |
|-----|------------|
| 307 | GO:0051272 |
| 308 | GO:0045742 |
| 309 | GO:0003340 |
| 310 | GO:0043200 |
| 311 | GO:0051262 |
| 312 | GO:0034505 |
| 313 | hsa05144   |
| 314 | GO:0031701 |
| 315 | GO:0051146 |
| 316 | GO:0032722 |
| 317 | GO:0003417 |
| 318 | GO:0045445 |
| 319 | GO:0030828 |
| 320 | GO:0007263 |
| 321 | GO:0045630 |
| 322 | GO:0033690 |
| 323 | GO:0030139 |
| 324 | GO:0060550 |
| 325 | GO:2000309 |
| 326 | GO:0060552 |
| 327 | GO:0044146 |
| 328 | GO:0071351 |
| 329 | GO:0035845 |
| 330 | GO:0060557 |
| 331 | GO:0051280 |
| 332 | GO:0031953 |
| 333 | GO:0060741 |
| 334 | GO:0085029 |
| 335 | GO:0032269 |
| 336 | GO:0060662 |
| 337 | GO:0030235 |
| 338 | GO:0030104 |
| 339 | GO:0032878 |
| 340 | GO:0032943 |
| 341 | GO:0060644 |
| 342 | GO:2000427 |
| 343 | GO:0051607 |
| 344 | GO:0043410 |
| 345 | GO:0002062 |
| 346 | GO:0050829 |
| 347 | GO:0035473 |
| 348 | GO:0071503 |
| 349 | GO:0035478 |

|     |            |
|-----|------------|
| 350 | GO:0090321 |
| 351 | GO:0017038 |
| 352 | GO:0006935 |
| 353 | GO:0010595 |
| 354 | GO:0030198 |
| 355 | GO:0014826 |
| 356 | GO:0017015 |
| 357 | GO:0006707 |
| 358 | GO:0070052 |
| 359 | GO:0071560 |
| 360 | GO:0002430 |
| 361 | GO:0070051 |
| 362 | hsa05143   |
| 363 | GO:0005161 |
| 364 | GO:0001786 |
| 365 | GO:0001502 |
| 366 | GO:0016056 |
| 367 | GO:0048565 |
| 368 | GO:0002218 |
| 369 | hsa05146   |
| 370 | GO:0070541 |
| 371 | GO:0042542 |
| 372 | GO:0060325 |
| 373 | GO:0060351 |
| 374 | GO:0048146 |
| 375 | GO:0030593 |
| 376 | GO:0007160 |
| 377 | GO:0070926 |
| 378 | GO:0060545 |
| 379 | GO:0004012 |
| 380 | GO:0007181 |
| 381 | GO:0022617 |
| 382 | GO:0048185 |
| 383 | GO:0005212 |
| 384 | GO:0051054 |
| 385 | GO:0071356 |
| 386 | GO:0070670 |
| 387 | GO:0042698 |
| 388 | GO:0002687 |
| 389 | GO:0042056 |
| 390 | GO:0007569 |
| 391 | GO:0042092 |
| 392 | GO:0022009 |

|     |            |
|-----|------------|
| 393 | GO:0045599 |
| 394 | GO:0002758 |
| 395 | hsa05219   |
| 396 | GO:0051152 |
| 397 | GO:0031102 |
| 398 | GO:0045740 |
| 399 | GO:0051926 |
| 400 | GO:0071391 |
| 401 | GO:0030346 |
| 402 | GO:0035767 |
| 403 | GO:0032966 |
| 404 | GO:2000288 |
| 405 | GO:0050921 |
| 406 | GO:0038063 |
| 407 | GO:0070633 |
| 408 | GO:0031362 |
| 409 | GO:0010628 |
| 410 | GO:0090190 |
| 411 | GO:0060174 |
| 412 | GO:0005138 |
| 413 | GO:0008285 |
| 414 | GO:0031727 |
| 415 | GO:0090265 |
| 416 | GO:0033081 |
| 417 | GO:0045188 |
| 418 | GO:0060561 |
| 419 | GO:0010332 |
| 420 | GO:0030308 |
| 421 | GO:0009583 |
| 422 | GO:0071456 |
| 423 | GO:0043277 |
| 424 | GO:0060510 |
| 425 | GO:0010189 |
| 426 | GO:0051216 |
| 427 | GO:0001822 |
| 428 | GO:0007566 |
| 429 | GO:0010718 |
| 430 | GO:0032417 |
| 431 | GO:0071260 |
| 432 | GO:0032784 |
| 433 | GO:0071223 |
| 434 | GO:0070208 |
| 435 | GO:0002520 |



|     |            |
|-----|------------|
| 436 | GO:0043491 |
| 437 | GO:0010574 |
| 438 | GO:0017158 |
| 439 | GO:0060751 |
| 440 | GO:0034393 |
| 441 | GO:0009817 |
| 442 | GO:0002460 |
| 443 | GO:1900126 |
| 444 | GO:0001955 |
| 445 | GO:0050927 |
| 446 | GO:0042993 |
| 447 | GO:0008089 |
| 448 | GO:0051894 |
| 449 | GO:0002021 |
| 450 | GO:0051246 |
| 451 | GO:0060740 |
| 452 | GO:0060087 |
| 453 | GO:0046716 |
| 454 | GO:0014834 |
| 455 | GO:0001895 |
| 456 | GO:0043526 |
| 457 | GO:0002767 |
| 458 | GO:0010760 |
| 459 | GO:0014061 |
| 460 | GO:0010897 |
| 461 | GO:0034358 |
| 462 | GO:0031714 |
| 463 | GO:0010519 |
| 464 | GO:0001848 |
| 465 | GO:0002581 |
| 466 | GO:0033299 |
| 467 | GO:0008009 |
| 468 | GO:0005125 |
| 469 | GO:0051919 |
| 470 | GO:0002605 |
| 471 | GO:0005604 |
| 472 | GO:0006801 |
| 473 | GO:0010754 |
| 474 | GO:0071674 |
| 475 | GO:0010751 |
| 476 | GO:0030177 |
| 477 | GO:0009612 |
| 478 | GO:0006928 |

|     |            |
|-----|------------|
| 479 | GO:0010694 |
| 480 | GO:0031663 |
| 481 | GO:0031702 |
| 482 | GO:0043654 |
| 483 | GO:0038027 |
| 484 | GO:0006165 |
| 485 | GO:0006183 |
| 486 | GO:0006228 |
| 487 | GO:0002790 |
| 488 | GO:0042612 |
| 489 | GO:0016525 |
| 490 | GO:0004550 |
| 491 | GO:0046548 |
| 492 | GO:0034188 |
| 493 | GO:0043325 |
| 494 | GO:0042462 |
| 495 | GO:0034392 |
| 496 | GO:0051591 |
| 497 | GO:0051659 |
| 498 | GO:0010165 |
| 499 | GO:0010812 |
| 500 | GO:0071230 |

b) mRMR features list

| Rank | Feature name |
|------|--------------|
| 1    | GO:0043537   |
| 2    | hsa04610     |
| 3    | GO:0071482   |
| 4    | GO:0001968   |
| 5    | GO:0034189   |
| 6    | GO:0005581   |
| 7    | GO:0030449   |
| 8    | GO:0048739   |
| 9    | hsa05150     |
| 10   | GO:0030023   |
| 11   | GO:1900006   |
| 12   | GO:0061302   |
| 13   | GO:0006029   |
| 14   | GO:0001970   |
| 15   | GO:0060744   |
| 16   | GO:0034437   |
| 17   | GO:0006957   |
| 18   | GO:0072563   |

|    |            |
|----|------------|
| 19 | GO:0008228 |
| 20 | GO:0030020 |
| 21 | GO:0032930 |
| 22 | GO:0006956 |
| 23 | GO:0031012 |
| 24 | GO:0002042 |
| 25 | GO:0071953 |
| 26 | GO:0006168 |
| 27 | GO:2001028 |
| 28 | GO:0007603 |
| 29 | GO:0035473 |
| 30 | GO:0032463 |
| 31 | GO:0034436 |
| 32 | GO:0006958 |
| 33 | GO:0060394 |
| 34 | GO:0035082 |
| 35 | GO:0035988 |
| 36 | GO:0030247 |
| 37 | GO:0031362 |
| 38 | GO:0051400 |
| 39 | GO:0010001 |
| 40 | GO:0032964 |
| 41 | GO:0042612 |
| 42 | GO:0051389 |
| 43 | GO:0006940 |
| 44 | GO:0042583 |
| 45 | GO:0002462 |
| 46 | GO:0060342 |
| 47 | GO:0002446 |
| 48 | GO:0042461 |
| 49 | GO:0038025 |
| 50 | GO:0071503 |
| 51 | GO:0010759 |
| 52 | GO:0048018 |
| 53 | GO:0050777 |
| 54 | GO:0035478 |
| 55 | GO:0004866 |
| 56 | GO:0090031 |
| 57 | GO:0038063 |
| 58 | GO:0070052 |
| 59 | GO:0072332 |
| 60 | GO:0043184 |
| 61 | GO:0031701 |

|     |            |
|-----|------------|
| 62  | GO:0035645 |
| 63  | GO:0001798 |
| 64  | GO:0005201 |
| 65  | GO:0090321 |
| 66  | GO:0009597 |
| 67  | GO:0003416 |
| 68  | GO:0001850 |
| 69  | GO:0070383 |
| 70  | GO:0034450 |
| 71  | GO:0016495 |
| 72  | GO:0045254 |
| 73  | GO:0048844 |
| 74  | GO:0001957 |
| 75  | GO:0035845 |
| 76  | GO:0017038 |
| 77  | GO:0060754 |
| 78  | GO:0030229 |
| 79  | GO:0030176 |
| 80  | GO:0003273 |
| 81  | GO:0004876 |
| 82  | GO:0010826 |
| 83  | GO:0007179 |
| 84  | GO:0033364 |
| 85  | GO:0031109 |
| 86  | GO:0017046 |
| 87  | GO:1900086 |
| 88  | GO:0019509 |
| 89  | GO:0043206 |
| 90  | GO:0004943 |
| 91  | GO:0030704 |
| 92  | GO:0021517 |
| 93  | GO:0010369 |
| 94  | GO:0005010 |
| 95  | GO:0051272 |
| 96  | GO:0002767 |
| 97  | GO:0001917 |
| 98  | GO:0000302 |
| 99  | GO:0005578 |
| 100 | GO:0004181 |
| 101 | GO:0055093 |
| 102 | GO:0008187 |
| 103 | GO:0005592 |
| 104 | GO:0034447 |

|     |            |
|-----|------------|
| 105 | GO:0043248 |
| 106 | GO:0061045 |
| 107 | GO:0051262 |
| 108 | GO:0009881 |
| 109 | GO:0051898 |
| 110 | GO:0048074 |
| 111 | GO:0006165 |
| 112 | GO:0019064 |
| 113 | GO:0002262 |
| 114 | GO:0043022 |
| 115 | GO:0000303 |
| 116 | GO:0002575 |
| 117 | GO:0046548 |
| 118 | GO:0032467 |
| 119 | GO:0005540 |
| 120 | GO:0004944 |
| 121 | GO:0043331 |
| 122 | GO:0051918 |
| 123 | GO:0005585 |
| 124 | GO:0051148 |
| 125 | GO:0060220 |
| 126 | GO:0001937 |
| 127 | GO:0032958 |
| 128 | GO:0003997 |
| 129 | GO:0035924 |
| 130 | GO:0060090 |
| 131 | GO:0032855 |
| 132 | GO:0006183 |
| 133 | GO:0030279 |
| 134 | GO:0038026 |
| 135 | GO:0060346 |
| 136 | GO:0005586 |
| 137 | GO:0004784 |
| 138 | GO:0060011 |
| 139 | GO:0071529 |
| 140 | GO:0046599 |
| 141 | GO:0048246 |
| 142 | GO:0043654 |
| 143 | GO:0010703 |
| 144 | GO:0010519 |
| 145 | GO:0048251 |
| 146 | GO:0032510 |
| 147 | GO:0043183 |

|     |            |
|-----|------------|
| 148 | GO:0032393 |
| 149 | GO:0006228 |
| 150 | GO:0007183 |
| 151 | GO:0002429 |
| 152 | GO:0000003 |
| 153 | GO:0034103 |
| 154 | GO:0070522 |
| 155 | GO:0045869 |
| 156 | GO:0043117 |
| 157 | GO:0060128 |
| 158 | GO:0007181 |
| 159 | GO:0006086 |
| 160 | GO:0060052 |
| 161 | hsa05323   |
| 162 | GO:0008340 |
| 163 | GO:0005930 |
| 164 | GO:0043536 |
| 165 | GO:0010189 |
| 166 | GO:0019799 |
| 167 | GO:0060313 |
| 168 | GO:0030199 |
| 169 | GO:0002551 |
| 170 | GO:0009451 |
| 171 | GO:0004550 |
| 172 | GO:2000764 |
| 173 | GO:0001569 |
| 174 | GO:0001919 |
| 175 | GO:0072686 |
| 176 | GO:0030169 |
| 177 | GO:0010711 |
| 178 | GO:2000763 |
| 179 | GO:2001199 |
| 180 | GO:0034405 |
| 181 | GO:0050665 |
| 182 | GO:0007184 |
| 183 | GO:0046629 |
| 184 | GO:0055087 |
| 185 | GO:0030949 |
| 186 | GO:0004012 |
| 187 | GO:0070483 |
| 188 | GO:0014909 |
| 189 | GO:0048476 |
| 190 | GO:0046359 |

|     |            |
|-----|------------|
| 191 | GO:0060311 |
| 192 | GO:0001974 |
| 193 | GO:0008266 |
| 194 | GO:0060662 |
| 195 | GO:0038091 |
| 196 | GO:0005602 |
| 197 | GO:0034711 |
| 198 | GO:0051856 |
| 199 | GO:0045494 |
| 200 | GO:0045103 |
| 201 | GO:0050840 |
| 202 | GO:0031616 |
| 203 | GO:0010987 |
| 204 | GO:0060123 |
| 205 | GO:0048598 |
| 206 | GO:0004509 |
| 207 | GO:0043498 |
| 208 | GO:0020028 |
| 209 | GO:0034021 |
| 210 | hsa04145   |
| 211 | GO:0048845 |
| 212 | GO:0004085 |
| 213 | GO:0017002 |
| 214 | GO:0033572 |
| 215 | GO:0001786 |
| 216 | GO:0032417 |
| 217 | GO:0042159 |
| 218 | GO:0005582 |
| 219 | GO:0045964 |
| 220 | GO:0034346 |
| 221 | GO:0019882 |
| 222 | GO:0033690 |
| 223 | GO:0032691 |
| 224 | GO:0072384 |
| 225 | GO:0021762 |
| 226 | GO:0038062 |
| 227 | GO:0043178 |
| 228 | GO:0014043 |
| 229 | GO:0043171 |
| 230 | GO:0070584 |
| 231 | GO:0002666 |
| 232 | GO:0007263 |
| 233 | GO:0033627 |

|     |            |
|-----|------------|
| 234 | GO:0008395 |
| 235 | GO:0019934 |
| 236 | GO:0031593 |
| 237 | GO:0071222 |
| 238 | GO:0043024 |
| 239 | GO:0060129 |
| 240 | GO:0035624 |
| 241 | GO:0055106 |
| 242 | GO:0001552 |
| 243 | GO:0034358 |
| 244 | GO:0005615 |
| 245 | GO:0034605 |
| 246 | GO:0003823 |
| 247 | GO:0045204 |
| 248 | GO:0002430 |
| 249 | GO:0060351 |
| 250 | GO:0048773 |
| 251 | hsa00290   |
| 252 | GO:0004962 |
| 253 | GO:0060427 |
| 254 | GO:0010760 |
| 255 | GO:0001938 |
| 256 | GO:0016500 |
| 257 | GO:0071777 |
| 258 | GO:0051271 |
| 259 | GO:0070371 |
| 260 | GO:0045209 |
| 261 | GO:0048640 |
| 262 | GO:0009409 |
| 263 | GO:0071638 |
| 264 | GO:0060319 |
| 265 | GO:0043159 |
| 266 | GO:0031093 |
| 267 | GO:0060658 |
| 268 | GO:0005212 |
| 269 | GO:0001867 |
| 270 | GO:0043405 |
| 271 | GO:0042157 |
| 272 | GO:0048245 |
| 273 | GO:0048593 |
| 274 | GO:0060591 |
| 275 | GO:0038027 |
| 276 | GO:0031714 |



|     |            |
|-----|------------|
| 277 | GO:0030184 |
| 278 | GO:0001315 |
| 279 | GO:0050953 |
| 280 | GO:0004169 |
| 281 | GO:0016578 |
| 282 | GO:0033299 |
| 283 | GO:0022617 |
| 284 | GO:0060174 |
| 285 | GO:0008554 |
| 286 | GO:0002282 |
| 287 | GO:0051988 |
| 288 | GO:0071241 |
| 289 | GO:0007565 |
| 290 | GO:0015074 |
| 291 | GO:0042116 |
| 292 | GO:0015126 |
| 293 | GO:0090101 |
| 294 | GO:0005172 |
| 295 | GO:0060699 |
| 296 | GO:0005583 |
| 297 | GO:0042613 |
| 298 | GO:0034363 |
| 299 | GO:0003417 |
| 300 | GO:0014904 |
| 301 | GO:0042978 |
| 302 | GO:0007062 |
| 303 | GO:0007497 |
| 304 | GO:0003069 |
| 305 | GO:0016044 |
| 306 | GO:0002790 |
| 307 | GO:0070208 |
| 308 | GO:0045766 |
| 309 | GO:0070506 |
| 310 | GO:0005223 |
| 311 | GO:0001502 |
| 312 | GO:0070633 |
| 313 | GO:0002504 |
| 314 | GO:0015432 |
| 315 | GO:0032784 |
| 316 | GO:0070513 |
| 317 | GO:0046813 |
| 318 | GO:0031497 |
| 319 | GO:0032809 |

|     |            |
|-----|------------|
| 320 | GO:0003429 |
| 321 | GO:0032488 |
| 322 | GO:0005114 |
| 323 | GO:0045116 |
| 324 | GO:0007387 |
| 325 | GO:0060527 |
| 326 | GO:0048257 |
| 327 | GO:0070051 |
| 328 | GO:0090207 |
| 329 | GO:0046911 |
| 330 | GO:0045591 |
| 331 | GO:0008209 |
| 332 | GO:0020005 |
| 333 | GO:0034505 |
| 334 | GO:0038161 |
| 335 | GO:0014065 |
| 336 | GO:0007388 |
| 337 | GO:0014896 |
| 338 | GO:0090037 |
| 339 | GO:0010821 |
| 340 | GO:0005604 |
| 341 | GO:0050689 |
| 342 | GO:0051000 |
| 343 | GO:0051873 |
| 344 | GO:0031491 |
| 345 | GO:0001300 |
| 346 | GO:0004422 |
| 347 | GO:0010165 |
| 348 | GO:0006741 |
| 349 | GO:0004925 |
| 350 | GO:0042993 |
| 351 | GO:0006707 |
| 352 | GO:0020003 |
| 353 | GO:0005577 |
| 354 | GO:0001844 |
| 355 | GO:0071062 |
| 356 | GO:0045423 |
| 357 | GO:0042622 |
| 358 | GO:0010740 |
| 359 | GO:0030516 |
| 360 | GO:0097241 |
| 361 | GO:0034188 |
| 362 | GO:0009441 |

|     |            |
|-----|------------|
| 363 | GO:0001578 |
| 364 | GO:0005588 |
| 365 | GO:0006999 |
| 366 | GO:0035377 |
| 367 | GO:0042267 |
| 368 | GO:0051146 |
| 369 | GO:0060763 |
| 370 | GO:0006705 |
| 371 | GO:0051651 |
| 372 | GO:0071622 |
| 373 | GO:0045779 |
| 374 | GO:0002523 |
| 375 | GO:0021681 |
| 376 | GO:0070926 |
| 377 | GO:0016272 |
| 378 | GO:0001848 |
| 379 | GO:1900142 |
| 380 | GO:0005520 |
| 381 | GO:0009249 |
| 382 | GO:0030496 |
| 383 | GO:0042095 |
| 384 | GO:0070287 |
| 385 | GO:0035092 |
| 386 | GO:0010763 |
| 387 | GO:0010917 |
| 388 | GO:0035379 |
| 389 | GO:0032805 |
| 390 | GO:0032226 |
| 391 | GO:0042698 |
| 392 | GO:0033186 |
| 393 | GO:0005883 |
| 394 | GO:0045429 |
| 395 | GO:0060020 |
| 396 | GO:0035378 |
| 397 | GO:0090303 |
| 398 | GO:0042147 |
| 399 | GO:2000048 |
| 400 | GO:0005044 |
| 401 | GO:0051098 |
| 402 | GO:0045414 |
| 403 | GO:0035458 |
| 404 | GO:0000930 |
| 405 | GO:0060545 |

|     |            |
|-----|------------|
| 406 | GO:1900165 |
| 407 | GO:0034185 |
| 408 | GO:0048407 |
| 409 | GO:0010764 |
| 410 | GO:0085018 |
| 411 | GO:0030492 |
| 412 | GO:0035767 |
| 413 | GO:0004873 |
| 414 | GO:0002541 |
| 415 | GO:0010498 |
| 416 | GO:0019348 |
| 417 | GO:0051001 |
| 418 | GO:0019835 |
| 419 | GO:2000533 |
| 420 | GO:0007269 |
| 421 | GO:0002537 |
| 422 | hsa04974   |
| 423 | GO:0030214 |
| 424 | GO:0048185 |
| 425 | GO:0002543 |
| 426 | GO:0005522 |
| 427 | GO:0042832 |
| 428 | GO:0002062 |
| 429 | GO:0009106 |
| 430 | GO:0042405 |
| 431 | GO:0005548 |
| 432 | GO:0032786 |
| 433 | GO:0010934 |
| 434 | GO:2001033 |
| 435 | GO:0048009 |
| 436 | GO:0007568 |
| 437 | GO:0016139 |
| 438 | GO:0006428 |
| 439 | GO:0032924 |
| 440 | GO:0051345 |
| 441 | GO:0031077 |
| 442 | GO:0016056 |
| 443 | GO:0008028 |
| 444 | GO:0032269 |
| 445 | GO:0005746 |
| 446 | GO:0045541 |
| 447 | GO:0008356 |
| 448 | GO:0030574 |

|     |            |
|-----|------------|
| 449 | GO:0031052 |
| 450 | GO:0001522 |
| 451 | GO:0006178 |
| 452 | GO:0010863 |
| 453 | GO:0015718 |
| 454 | GO:0043394 |
| 455 | GO:0002687 |
| 456 | GO:0019430 |
| 457 | GO:0050655 |
| 458 | GO:0060452 |
| 459 | GO:0004609 |
| 460 | GO:0048549 |
| 461 | GO:0030514 |
| 462 | GO:0009583 |
| 463 | GO:0043559 |
| 464 | GO:0008262 |
| 465 | GO:0046464 |
| 466 | GO:0031065 |
| 467 | GO:0043544 |
| 468 | GO:0071593 |
| 469 | GO:0002820 |
| 470 | GO:0005072 |
| 471 | hsa03013   |
| 472 | GO:0007160 |
| 473 | GO:0042801 |
| 474 | GO:0014826 |
| 475 | GO:0003131 |
| 476 | GO:0006457 |
| 477 | GO:0042660 |
| 478 | GO:0001952 |
| 479 | GO:0032757 |
| 480 | GO:0012501 |
| 481 | GO:0008061 |
| 482 | GO:0010897 |
| 483 | GO:0033185 |
| 484 | GO:0005178 |
| 485 | GO:0007256 |
| 486 | GO:0009116 |
| 487 | GO:0071712 |
| 488 | GO:0051580 |
| 489 | GO:0046083 |
| 490 | GO:0032793 |
| 491 | GO:0046907 |

|     |            |
|-----|------------|
| 492 | GO:0090150 |
| 493 | GO:0003006 |
| 494 | GO:0048678 |
| 495 | GO:2001051 |
| 496 | GO:0051142 |
| 497 | GO:0003828 |
| 498 | GO:0015485 |
| 499 | GO:0085029 |
| 500 | GO:0048525 |

(6) Dataset  $D_6$

a) MaxRel features list

| Rank | Feature name |
|------|--------------|
| 1    | GO:0034436   |
| 2    | GO:0034437   |
| 3    | GO:0034189   |
| 4    | GO:0038025   |
| 5    | GO:1900006   |
| 6    | GO:0030449   |
| 7    | GO:0016495   |
| 8    | GO:0043498   |
| 9    | GO:0043537   |
| 10   | GO:0071953   |
| 11   | GO:2001028   |
| 12   | GO:0043117   |
| 13   | GO:0001970   |
| 14   | GO:0031701   |
| 15   | GO:0032855   |
| 16   | GO:0010001   |
| 17   | GO:0071482   |
| 18   | GO:0002575   |
| 19   | GO:0048739   |
| 20   | GO:0031109   |
| 21   | GO:0006290   |
| 22   | hsa04610     |
| 23   | GO:0043206   |
| 24   | GO:0048844   |
| 25   | GO:0090031   |
| 26   | GO:0001300   |
| 27   | GO:0034447   |
| 28   | GO:0003273   |
| 29   | GO:0060342   |
| 30   | GO:0051400   |

|    |            |
|----|------------|
| 31 | GO:0043183 |
| 32 | GO:0009409 |
| 33 | GO:0010703 |
| 34 | GO:0010711 |
| 35 | GO:0060313 |
| 36 | GO:0060311 |
| 37 | GO:0034103 |
| 38 | GO:0005010 |
| 39 | GO:0072563 |
| 40 | GO:0005172 |
| 41 | GO:0045103 |
| 42 | GO:0032757 |
| 43 | GO:0005615 |
| 44 | GO:0035645 |
| 45 | GO:0043536 |
| 46 | GO:0021762 |
| 47 | GO:0033364 |
| 48 | GO:0042231 |
| 49 | GO:2000256 |
| 50 | GO:0042033 |
| 51 | GO:0042253 |
| 52 | GO:0001938 |
| 53 | GO:0051389 |
| 54 | GO:0045429 |
| 55 | GO:0060754 |
| 56 | GO:0032805 |
| 57 | GO:0042660 |
| 58 | GO:0001315 |
| 59 | GO:0051856 |
| 60 | GO:0048773 |
| 61 | GO:0046911 |
| 62 | GO:0003069 |
| 63 | GO:0051651 |
| 64 | GO:0034021 |
| 65 | GO:0005586 |
| 66 | GO:0031012 |
| 67 | GO:0002032 |
| 68 | GO:0060319 |
| 69 | GO:0010759 |
| 70 | GO:0042095 |
| 71 | GO:0050777 |
| 72 | GO:0000303 |
| 73 | GO:0002446 |

|     |            |
|-----|------------|
| 74  | GO:0032467 |
| 75  | GO:0034185 |
| 76  | GO:0051580 |
| 77  | GO:0060763 |
| 78  | GO:0010625 |
| 79  | GO:0002282 |
| 80  | GO:0044464 |
| 81  | GO:0030229 |
| 82  | GO:0038026 |
| 83  | GO:0060312 |
| 84  | GO:0001974 |
| 85  | GO:0038091 |
| 86  | GO:1900086 |
| 87  | GO:0001798 |
| 88  | GO:0014896 |
| 89  | GO:0000302 |
| 90  | GO:0030949 |
| 91  | GO:0009441 |
| 92  | GO:0035767 |
| 93  | GO:0014904 |
| 94  | GO:0005548 |
| 95  | GO:0002523 |
| 96  | GO:0061045 |
| 97  | GO:0035630 |
| 98  | GO:0032930 |
| 99  | GO:0032364 |
| 100 | GO:0032809 |
| 101 | GO:0043331 |
| 102 | GO:0032432 |
| 103 | GO:0042088 |
| 104 | GO:0034346 |
| 105 | GO:0002384 |
| 106 | GO:0060644 |
| 107 | GO:0046813 |
| 108 | GO:0035924 |
| 109 | GO:0006958 |
| 110 | GO:0045766 |
| 111 | GO:0002457 |
| 112 | GO:0007497 |
| 113 | GO:0001910 |
| 114 | hsa05150   |
| 115 | GO:0002693 |
| 116 | GO:0010477 |



|     |            |
|-----|------------|
| 117 | GO:0070091 |
| 118 | GO:0051971 |
| 119 | GO:0071222 |
| 120 | GO:0050665 |
| 121 | GO:0048246 |
| 122 | GO:0005576 |
| 123 | GO:0032463 |
| 124 | GO:0007256 |
| 125 | GO:0002021 |
| 126 | GO:0070886 |
| 127 | GO:0051272 |
| 128 | GO:0002262 |
| 129 | GO:0017158 |
| 130 | GO:0030166 |
| 131 | GO:0032700 |
| 132 | GO:0033160 |
| 133 | GO:0033627 |
| 134 | GO:0004943 |
| 135 | GO:0055091 |
| 136 | GO:0002462 |
| 137 | GO:0001850 |
| 138 | GO:0006956 |
| 139 | GO:0006957 |
| 140 | GO:0004876 |
| 141 | GO:0014043 |
| 142 | GO:0032387 |
| 143 | GO:0048678 |
| 144 | GO:0060509 |
| 145 | GO:0021517 |
| 146 | GO:0060744 |
| 147 | GO:0005072 |
| 148 | GO:0043129 |
| 149 | GO:0004866 |
| 150 | GO:0034405 |
| 151 | GO:0009881 |
| 152 | GO:0009597 |
| 153 | GO:0002551 |
| 154 | GO:0048245 |
| 155 | GO:0034363 |
| 156 | GO:0019430 |
| 157 | GO:0014909 |
| 158 | GO:0033700 |
| 159 | GO:0010764 |

|     |            |
|-----|------------|
| 160 | GO:0005006 |
| 161 | GO:0070301 |
| 162 | GO:0004784 |
| 163 | GO:0045541 |
| 164 | GO:0060741 |
| 165 | GO:0010863 |
| 166 | GO:0051001 |
| 167 | GO:0044146 |
| 168 | GO:0060552 |
| 169 | GO:0060550 |
| 170 | GO:2000309 |
| 171 | GO:0071351 |
| 172 | GO:0042159 |
| 173 | GO:0033141 |
| 174 | GO:0060011 |
| 175 | GO:0042056 |
| 176 | GO:0048845 |
| 177 | GO:0051142 |
| 178 | GO:0070050 |
| 179 | GO:0055099 |
| 180 | GO:0032417 |
| 181 | GO:0042583 |
| 182 | GO:0052033 |
| 183 | GO:0004962 |
| 184 | GO:0046629 |
| 185 | GO:0002429 |
| 186 | GO:0055090 |
| 187 | GO:0010519 |
| 188 | GO:0001890 |
| 189 | GO:0032958 |
| 190 | GO:0050840 |
| 191 | GO:0022617 |
| 192 | GO:0042094 |
| 193 | GO:0004944 |
| 194 | GO:0045359 |
| 195 | GO:0060228 |
| 196 | GO:0061302 |
| 197 | GO:0008395 |
| 198 | GO:0046716 |
| 199 | GO:0002042 |
| 200 | GO:0060020 |
| 201 | GO:0010288 |
| 202 | GO:0060052 |

|     |            |
|-----|------------|
| 203 | GO:0030104 |
| 204 | GO:0019934 |
| 205 | GO:0072332 |
| 206 | GO:0033691 |
| 207 | GO:0005534 |
| 208 | GO:0032722 |
| 209 | GO:0034393 |
| 210 | GO:0071813 |
| 211 | GO:0002291 |
| 212 | GO:0070022 |
| 213 | GO:0060510 |
| 214 | GO:0070430 |
| 215 | GO:0070434 |
| 216 | GO:0016046 |
| 217 | GO:0016942 |
| 218 | GO:0043200 |
| 219 | GO:0008209 |
| 220 | GO:0032732 |
| 221 | GO:0042149 |
| 222 | GO:0071258 |
| 223 | GO:0048549 |
| 224 | GO:0061044 |
| 225 | GO:0007181 |
| 226 | GO:0035491 |
| 227 | GO:0070887 |
| 228 | GO:0070483 |
| 229 | GO:0019836 |
| 230 | GO:0001666 |
| 231 | GO:0042832 |
| 232 | GO:0071346 |
| 233 | GO:0048635 |
| 234 | GO:0000189 |
| 235 | GO:0005581 |
| 236 | GO:0032488 |
| 237 | GO:2000098 |
| 238 | GO:0055093 |
| 239 | hsa05323   |
| 240 | GO:0042698 |
| 241 | GO:0048009 |
| 242 | GO:0014826 |
| 243 | GO:0050650 |
| 244 | GO:0042060 |
| 245 | GO:0060128 |

|     |            |
|-----|------------|
| 246 | GO:0030247 |
| 247 | GO:2000121 |
| 248 | GO:0032270 |
| 249 | GO:0050921 |
| 250 | GO:0001895 |
| 251 | GO:0006707 |
| 252 | GO:0010189 |
| 253 | GO:0060591 |
| 254 | GO:0048598 |
| 255 | GO:0002537 |
| 256 | GO:2000366 |
| 257 | GO:0070371 |
| 258 | GO:0045188 |
| 259 | GO:0051898 |
| 260 | GO:0051000 |
| 261 | GO:0034188 |
| 262 | GO:0038027 |
| 263 | GO:0002790 |
| 264 | GO:0032510 |
| 265 | GO:0008228 |
| 266 | GO:0070670 |
| 267 | GO:0007584 |
| 268 | hsa05143   |
| 269 | GO:0051926 |
| 270 | GO:0008360 |
| 271 | GO:2000379 |
| 272 | GO:0060394 |
| 273 | GO:0008090 |
| 274 | GO:0048251 |
| 275 | GO:0048407 |
| 276 | GO:0005114 |
| 277 | GO:0008217 |
| 278 | GO:0006940 |
| 279 | GO:0070373 |
| 280 | GO:0001781 |
| 281 | GO:0030235 |
| 282 | GO:0033081 |
| 283 | GO:0031953 |
| 284 | GO:0051712 |
| 285 | GO:0048593 |
| 286 | GO:0003340 |
| 287 | GO:0007250 |
| 288 | GO:0033299 |

|     |            |
|-----|------------|
| 289 | GO:0005041 |
| 290 | GO:2000097 |
| 291 | GO:0043576 |
| 292 | GO:0042627 |
| 293 | GO:0004252 |
| 294 | GO:0050766 |
| 295 | GO:0005905 |
| 296 | GO:0007179 |
| 297 | GO:0005578 |
| 298 | GO:0035624 |
| 299 | GO:0060068 |
| 300 | GO:0045740 |
| 301 | GO:0071456 |
| 302 | GO:0030139 |
| 303 | GO:0071356 |
| 304 | GO:0034369 |
| 305 | GO:0010900 |
| 306 | GO:0004509 |
| 307 | GO:0030516 |
| 308 | GO:0010740 |
| 309 | GO:0001569 |
| 310 | GO:0051246 |
| 311 | GO:0007568 |
| 312 | GO:0030195 |
| 313 | GO:0003032 |
| 314 | GO:0051894 |
| 315 | GO:0043388 |
| 316 | GO:0021940 |
| 317 | GO:0042116 |
| 318 | GO:0031017 |
| 319 | GO:0045721 |
| 320 | GO:0071361 |
| 321 | GO:0010875 |
| 322 | GO:0006704 |
| 323 | GO:0051659 |
| 324 | GO:0016056 |
| 325 | GO:0007263 |
| 326 | GO:0007399 |
| 327 | GO:0010902 |
| 328 | GO:0032367 |
| 329 | GO:0010916 |
| 330 | GO:0004465 |
| 331 | GO:0042158 |

|     |            |
|-----|------------|
| 332 | GO:0034382 |
| 333 | GO:0045953 |
| 334 | GO:0034097 |
| 335 | GO:0005585 |
| 336 | GO:0005161 |
| 337 | GO:0050927 |
| 338 | GO:0051054 |
| 339 | GO:0014910 |
| 340 | GO:0002687 |
| 341 | GO:0033591 |
| 342 | GO:0045084 |
| 343 | GO:0032287 |
| 344 | GO:0031077 |
| 345 | GO:2000288 |
| 346 | GO:0001937 |
| 347 | GO:0032878 |
| 348 | GO:0001957 |
| 349 | GO:0009408 |
| 350 | GO:0060087 |
| 351 | GO:0001968 |
| 352 | GO:0001540 |
| 353 | GO:0060452 |
| 354 | GO:0051873 |
| 355 | GO:0005520 |
| 356 | GO:0032784 |
| 357 | GO:0042612 |
| 358 | GO:0019064 |
| 359 | GO:0072126 |
| 360 | GO:0010873 |
| 361 | GO:0072264 |
| 362 | GO:0006898 |
| 363 | GO:2000591 |
| 364 | GO:0072255 |
| 365 | GO:0051005 |
| 366 | GO:0005133 |
| 367 | GO:0046620 |
| 368 | GO:0030214 |
| 369 | GO:0051280 |
| 370 | GO:0016004 |
| 371 | GO:0008083 |
| 372 | GO:0047485 |
| 373 | GO:0090197 |
| 374 | GO:0006917 |

|     |            |
|-----|------------|
| 375 | GO:0001502 |
| 376 | GO:0009583 |
| 377 | GO:0051602 |
| 378 | GO:0015643 |
| 379 | GO:0032691 |
| 380 | GO:0002690 |
| 381 | GO:0045725 |
| 382 | GO:0009611 |
| 383 | GO:0042092 |
| 384 | GO:0070326 |
| 385 | GO:0034605 |
| 386 | GO:0010951 |
| 387 | GO:0044241 |
| 388 | GO:0060697 |
| 389 | GO:0010760 |
| 390 | GO:0010897 |
| 391 | GO:0031714 |
| 392 | GO:0055102 |
| 393 | GO:0034358 |
| 394 | GO:0045742 |
| 395 | GO:0019049 |
| 396 | GO:0072308 |
| 397 | GO:0042307 |
| 398 | GO:0046677 |
| 399 | GO:0043559 |
| 400 | GO:0043154 |
| 401 | GO:0032269 |
| 402 | GO:0002576 |
| 403 | GO:0003084 |
| 404 | GO:0042310 |
| 405 | GO:0031702 |
| 406 | GO:0060084 |
| 407 | GO:0008289 |
| 408 | GO:0034362 |
| 409 | GO:0035473 |
| 410 | GO:0035478 |
| 411 | GO:0017038 |
| 412 | GO:0090321 |
| 413 | GO:0001567 |
| 414 | GO:0006869 |
| 415 | GO:0070287 |
| 416 | GO:0034041 |
| 417 | GO:0050051 |

|     |            |
|-----|------------|
| 418 | GO:0052871 |
| 419 | GO:0021858 |
| 420 | GO:0010874 |
| 421 | GO:0009720 |
| 422 | GO:0010872 |
| 423 | GO:0071503 |
| 424 | GO:0031999 |
| 425 | GO:0045884 |
| 426 | GO:0005158 |
| 427 | GO:0014065 |
| 428 | GO:0032496 |
| 429 | GO:0010512 |
| 430 | GO:0008201 |
| 431 | GO:0010224 |
| 432 | GO:0070541 |
| 433 | GO:0050995 |
| 434 | GO:0045348 |
| 435 | hsa05144   |
| 436 | GO:0051346 |
| 437 | GO:0030155 |
| 438 | GO:0007565 |
| 439 | GO:0014834 |
| 440 | GO:0006029 |
| 441 | GO:0051918 |
| 442 | GO:0071062 |
| 443 | GO:0032181 |
| 444 | GO:0000406 |
| 445 | GO:0001991 |
| 446 | GO:0001543 |
| 447 | GO:0033602 |
| 448 | GO:0032226 |
| 449 | GO:0032302 |
| 450 | GO:0042953 |
| 451 | GO:0008009 |
| 452 | GO:2000048 |
| 453 | GO:0015920 |
| 454 | GO:0015485 |
| 455 | hsa05020   |
| 456 | GO:0042267 |
| 457 | GO:0033552 |
| 458 | GO:0090050 |
| 459 | GO:2000378 |
| 460 | GO:0045906 |



|     |            |
|-----|------------|
| 461 | GO:0010757 |
| 462 | GO:0048661 |
| 463 | GO:0003823 |
| 464 | GO:0045079 |
| 465 | GO:0060729 |
| 466 | GO:0010763 |
| 467 | GO:0090037 |
| 468 | GO:0051044 |
| 469 | GO:0060740 |
| 470 | GO:0043184 |
| 471 | GO:0008089 |
| 472 | GO:0034392 |
| 473 | GO:0033025 |
| 474 | GO:0032368 |
| 475 | GO:0031726 |
| 476 | GO:0071506 |
| 477 | GO:0031663 |
| 478 | GO:0032494 |
| 479 | GO:0032964 |
| 480 | GO:0031362 |
| 481 | GO:0071347 |
| 482 | hsa05416   |
| 483 | GO:0070093 |
| 484 | GO:0018298 |
| 485 | GO:0043491 |
| 486 | GO:0002028 |
| 487 | GO:0006700 |
| 488 | GO:0043066 |
| 489 | GO:0042535 |
| 490 | GO:0010165 |
| 491 | GO:0002666 |
| 492 | GO:0030838 |
| 493 | GO:0045785 |
| 494 | GO:0045630 |
| 495 | GO:0071230 |
| 496 | GO:0005537 |
| 497 | GO:0010466 |
| 498 | GO:2001141 |
| 499 | GO:0002218 |
| 500 | hsa05133   |

b) mRMR features list

| Rank | Feature name |
|------|--------------|
|------|--------------|

|    |            |
|----|------------|
| 1  | GO:0034436 |
| 2  | GO:0006956 |
| 3  | GO:0048739 |
| 4  | GO:0031701 |
| 5  | GO:0030449 |
| 6  | GO:0050777 |
| 7  | GO:1900006 |
| 8  | GO:0060744 |
| 9  | GO:0043498 |
| 10 | GO:0071482 |
| 11 | GO:0034437 |
| 12 | GO:0046629 |
| 13 | hsa04610   |
| 14 | GO:0005586 |
| 15 | GO:0008395 |
| 16 | GO:0034189 |
| 17 | GO:0002032 |
| 18 | GO:0035767 |
| 19 | GO:0033364 |
| 20 | GO:0014909 |
| 21 | GO:0016495 |
| 22 | GO:0031012 |
| 23 | GO:0002429 |
| 24 | GO:0071953 |
| 25 | GO:0002446 |
| 26 | GO:0005581 |
| 27 | GO:0032364 |
| 28 | GO:0043206 |
| 29 | GO:0010759 |
| 30 | GO:0010001 |
| 31 | GO:0006958 |
| 32 | GO:0055090 |
| 33 | GO:0043117 |
| 34 | GO:0032417 |
| 35 | GO:0038025 |
| 36 | GO:0055099 |
| 37 | GO:0001970 |
| 38 | GO:0042612 |
| 39 | GO:0005548 |
| 40 | GO:0031362 |
| 41 | GO:0043537 |
| 42 | GO:0045953 |
| 43 | GO:2001028 |

|    |            |
|----|------------|
| 44 | GO:0004509 |
| 45 | GO:0032855 |
| 46 | GO:0007181 |
| 47 | GO:0010519 |
| 48 | GO:0006290 |
| 49 | GO:0051272 |
| 50 | GO:0006957 |
| 51 | GO:0032463 |
| 52 | GO:0005010 |
| 53 | GO:0048549 |
| 54 | GO:0055091 |
| 55 | GO:0061302 |
| 56 | GO:0048844 |
| 57 | GO:0047485 |
| 58 | GO:0004943 |
| 59 | GO:0060342 |
| 60 | GO:0004866 |
| 61 | GO:0072563 |
| 62 | GO:0015355 |
| 63 | GO:0060011 |
| 64 | GO:0060754 |
| 65 | GO:0010189 |
| 66 | GO:0031109 |
| 67 | GO:0032226 |
| 68 | GO:0030247 |
| 69 | GO:0032510 |
| 70 | GO:0021858 |
| 71 | GO:0070050 |
| 72 | GO:0050840 |
| 73 | GO:0002462 |
| 74 | GO:0043183 |
| 75 | GO:0033700 |
| 76 | GO:0006168 |
| 77 | GO:0001315 |
| 78 | GO:0035624 |
| 79 | GO:0008289 |
| 80 | GO:0035645 |
| 81 | GO:0051873 |
| 82 | GO:0038026 |
| 83 | GO:0042698 |
| 84 | GO:0051400 |
| 85 | GO:0001850 |
| 86 | GO:0005578 |

|     |            |
|-----|------------|
| 87  | GO:0002575 |
| 88  | GO:0006869 |
| 89  | GO:0034447 |
| 90  | GO:0042149 |
| 91  | GO:0003273 |
| 92  | GO:0038063 |
| 93  | GO:0060052 |
| 94  | GO:0001974 |
| 95  | GO:0004876 |
| 96  | GO:0034362 |
| 97  | GO:0045103 |
| 98  | GO:0061045 |
| 99  | GO:0005537 |
| 100 | GO:0033299 |
| 101 | GO:0048593 |
| 102 | GO:0000302 |
| 103 | GO:0035473 |
| 104 | GO:0010703 |
| 105 | GO:0005585 |
| 106 | GO:0006704 |
| 107 | hsa05150   |
| 108 | GO:0034041 |
| 109 | GO:1900086 |
| 110 | GO:0034185 |
| 111 | hsa04974   |
| 112 | GO:0002523 |
| 113 | GO:0001300 |
| 114 | GO:0035478 |
| 115 | GO:0009881 |
| 116 | GO:0000003 |
| 117 | GO:0010711 |
| 118 | GO:0005610 |
| 119 | GO:0048773 |
| 120 | GO:0009720 |
| 121 | GO:0007179 |
| 122 | GO:0034369 |
| 123 | GO:0015718 |
| 124 | GO:0038091 |
| 125 | GO:0042583 |
| 126 | GO:0017038 |
| 127 | GO:0060313 |
| 128 | GO:0032691 |
| 129 | GO:0007497 |

|     |            |
|-----|------------|
| 130 | GO:0019064 |
| 131 | GO:0005597 |
| 132 | GO:0001798 |
| 133 | GO:0010872 |
| 134 | GO:0005615 |
| 135 | GO:0090321 |
| 136 | GO:0006741 |
| 137 | GO:0072332 |
| 138 | GO:0060311 |
| 139 | GO:0042147 |
| 140 | GO:0051856 |
| 141 | GO:0034605 |
| 142 | GO:0030229 |
| 143 | GO:0008228 |
| 144 | GO:0005172 |
| 145 | GO:0008028 |
| 146 | GO:0010900 |
| 147 | GO:0090031 |
| 148 | GO:0008271 |
| 149 | GO:0005883 |
| 150 | GO:0070287 |
| 151 | GO:0048407 |
| 152 | GO:0034103 |
| 153 | GO:0003069 |
| 154 | GO:0010874 |
| 155 | GO:0032930 |
| 156 | GO:0090305 |
| 157 | GO:0043576 |
| 158 | GO:0042627 |
| 159 | GO:0072686 |
| 160 | GO:0050766 |
| 161 | GO:0071503 |
| 162 | GO:2001141 |
| 163 | GO:0022617 |
| 164 | GO:0032181 |
| 165 | GO:0033691 |
| 166 | GO:0032757 |
| 167 | GO:0008272 |
| 168 | GO:0034188 |
| 169 | GO:0034021 |
| 170 | GO:0006029 |
| 171 | GO:0060319 |
| 172 | GO:0060229 |

|     |            |
|-----|------------|
| 173 | GO:0001778 |
| 174 | GO:0060510 |
| 175 | GO:0071258 |
| 176 | GO:0034122 |
| 177 | GO:0035924 |
| 178 | GO:0044241 |
| 179 | GO:0070052 |
| 180 | GO:0046813 |
| 181 | GO:0000406 |
| 182 | GO:0001867 |
| 183 | GO:0004252 |
| 184 | GO:0001567 |
| 185 | GO:0005201 |
| 186 | GO:0000303 |
| 187 | GO:0004944 |
| 188 | GO:0061044 |
| 189 | GO:0005520 |
| 190 | GO:0038027 |
| 191 | GO:0021517 |
| 192 | GO:0007603 |
| 193 | GO:0030621 |
| 194 | GO:0017158 |
| 195 | GO:0034755 |
| 196 | GO:0051635 |
| 197 | GO:2000097 |
| 198 | GO:0051580 |
| 199 | GO:0010501 |
| 200 | GO:0002031 |
| 201 | GO:0035491 |
| 202 | hsa00290   |
| 203 | GO:0042231 |
| 204 | GO:0002790 |
| 205 | GO:0032302 |
| 206 | GO:0043536 |
| 207 | GO:0008186 |
| 208 | GO:0051270 |
| 209 | GO:0018184 |
| 210 | GO:0005114 |
| 211 | GO:0010625 |
| 212 | GO:0090281 |
| 213 | GO:0071813 |
| 214 | GO:0043129 |
| 215 | GO:0010760 |

|     |            |
|-----|------------|
| 216 | GO:0060084 |
| 217 | GO:0060068 |
| 218 | GO:0004962 |
| 219 | GO:0003999 |
| 220 | GO:2000256 |
| 221 | GO:0035375 |
| 222 | GO:0001786 |
| 223 | GO:0006707 |
| 224 | GO:0070887 |
| 225 | GO:0031491 |
| 226 | GO:0060123 |
| 227 | GO:0031714 |
| 228 | GO:0044464 |
| 229 | GO:0060452 |
| 230 | GO:0060394 |
| 231 | GO:0060228 |
| 232 | GO:0006165 |
| 233 | GO:0043152 |
| 234 | GO:0042033 |
| 235 | GO:0001502 |
| 236 | GO:2000098 |
| 237 | GO:0031573 |
| 238 | GO:0033627 |
| 239 | GO:0006705 |
| 240 | GO:0051389 |
| 241 | GO:0019882 |
| 242 | GO:0002042 |
| 243 | GO:0045254 |
| 244 | GO:0015074 |
| 245 | GO:0060763 |
| 246 | GO:0035379 |
| 247 | hsa00450   |
| 248 | GO:0050051 |
| 249 | GO:0032784 |
| 250 | GO:0005577 |
| 251 | GO:0050665 |
| 252 | GO:0030166 |
| 253 | GO:0034358 |
| 254 | GO:0010740 |
| 255 | GO:0019237 |
| 256 | GO:0042253 |
| 257 | GO:0052871 |
| 258 | GO:0048273 |

|     |            |
|-----|------------|
| 259 | GO:0042158 |
| 260 | GO:0006228 |
| 261 | GO:0010288 |
| 262 | GO:0015728 |
| 263 | GO:0034405 |
| 264 | GO:0046836 |
| 265 | GO:0030070 |
| 266 | GO:0045116 |
| 267 | GO:0021762 |
| 268 | GO:0055092 |
| 269 | GO:0035378 |
| 270 | GO:0002262 |
| 271 | GO:0010902 |
| 272 | GO:0032432 |
| 273 | GO:0002055 |
| 274 | GO:0016056 |
| 275 | GO:0003823 |
| 276 | GO:0034375 |
| 277 | GO:0007184 |
| 278 | GO:0014910 |
| 279 | GO:0060644 |
| 280 | GO:0015130 |
| 281 | GO:0002666 |
| 282 | GO:0014043 |
| 283 | GO:0045046 |
| 284 | GO:0010388 |
| 285 | GO:0016209 |
| 286 | GO:0001574 |
| 287 | GO:0007256 |
| 288 | GO:0004465 |
| 289 | GO:0070195 |
| 290 | GO:0042056 |
| 291 | GO:0021678 |
| 292 | GO:0034382 |
| 293 | GO:0035377 |
| 294 | GO:0033025 |
| 295 | GO:0005041 |
| 296 | GO:0006183 |
| 297 | GO:0032809 |
| 298 | GO:1900025 |
| 299 | GO:0032964 |
| 300 | GO:0032467 |
| 301 | GO:0032367 |



|     |            |
|-----|------------|
| 302 | GO:0033602 |
| 303 | GO:0060591 |
| 304 | GO:0030949 |
| 305 | GO:0045796 |
| 306 | GO:0045128 |
| 307 | GO:0043331 |
| 308 | GO:0005539 |
| 309 | GO:0033145 |
| 310 | GO:0034363 |
| 311 | GO:1900028 |
| 312 | GO:0001543 |
| 313 | GO:0015116 |
| 314 | GO:0050655 |
| 315 | GO:0002282 |
| 316 | GO:0034365 |
| 317 | GO:0042310 |
| 318 | GO:0070022 |
| 319 | GO:0004473 |
| 320 | GO:0043654 |
| 321 | GO:0070698 |
| 322 | GO:0097186 |
| 323 | GO:0009409 |
| 324 | GO:0015168 |
| 325 | GO:0005319 |
| 326 | GO:0006700 |
| 327 | GO:0010951 |
| 328 | GO:0019430 |
| 329 | GO:0001537 |
| 330 | GO:0006311 |
| 331 | GO:0032393 |
| 332 | GO:0014826 |
| 333 | GO:0032994 |
| 334 | GO:0048246 |
| 335 | GO:0004550 |
| 336 | GO:0004903 |
| 337 | GO:0004181 |
| 338 | GO:0030023 |
| 339 | GO:0043184 |
| 340 | GO:0006898 |
| 341 | GO:0050790 |
| 342 | GO:0043196 |
| 343 | GO:0034445 |
| 344 | GO:0051894 |

|     |            |
|-----|------------|
| 345 | GO:0071622 |
| 346 | GO:0003032 |
| 347 | GO:0005604 |
| 348 | GO:0016557 |
| 349 | GO:0060312 |
| 350 | GO:0003828 |
| 351 | GO:0005223 |
| 352 | GO:0002551 |
| 353 | GO:0010949 |
| 354 | GO:0003104 |
| 355 | GO:0002204 |
| 356 | GO:0046548 |
| 357 | GO:0019836 |
| 358 | GO:0006940 |
| 359 | GO:0042632 |
| 360 | GO:0042095 |
| 361 | GO:0038062 |
| 362 | GO:0006488 |
| 363 | GO:0035630 |
| 364 | GO:0034373 |
| 365 | GO:0005006 |
| 366 | GO:0030184 |
| 367 | GO:0042660 |
| 368 | GO:0042461 |
| 369 | GO:0048814 |
| 370 | GO:0005588 |
| 371 | GO:0032368 |
| 372 | GO:0032805 |
| 373 | GO:0007601 |
| 374 | GO:0005158 |
| 375 | GO:0020003 |
| 376 | GO:0004784 |
| 377 | GO:0030199 |
| 378 | GO:0051971 |
| 379 | GO:0016556 |
| 380 | GO:0006508 |
| 381 | GO:0070278 |
| 382 | GO:0020005 |
| 383 | GO:0042267 |
| 384 | GO:0046314 |
| 385 | GO:0008209 |
| 386 | GO:0035082 |
| 387 | GO:0005905 |

|     |            |
|-----|------------|
| 388 | GO:0030948 |
| 389 | GO:0005576 |
| 390 | GO:0021885 |
| 391 | GO:0050953 |
| 392 | GO:0051005 |
| 393 | GO:0043159 |
| 394 | GO:0046911 |
| 395 | GO:0002543 |
| 396 | GO:0043405 |
| 397 | GO:0001938 |
| 398 | GO:0003097 |
| 399 | GO:0008396 |
| 400 | GO:0010916 |
| 401 | GO:0031593 |
| 402 | GO:0032387 |
| 403 | GO:0051148 |
| 404 | GO:0016705 |
| 405 | GO:0033783 |
| 406 | GO:0010260 |
| 407 | GO:0085018 |
| 408 | GO:0060128 |
| 409 | GO:0010747 |
| 410 | GO:0042088 |
| 411 | GO:0002541 |
| 412 | GO:0004111 |
| 413 | GO:0008191 |
| 414 | GO:0045429 |
| 415 | GO:0016189 |
| 416 | GO:0007606 |
| 417 | GO:0051651 |
| 418 | GO:0071241 |
| 419 | GO:0017112 |
| 420 | GO:0001895 |
| 421 | GO:0060041 |
| 422 | GO:0010641 |
| 423 | GO:0031077 |
| 424 | GO:0009914 |
| 425 | GO:0005969 |
| 426 | GO:0009597 |
| 427 | GO:0008187 |
| 428 | GO:0071062 |
| 429 | GO:0045910 |
| 430 | GO:0050927 |

|     |            |
|-----|------------|
| 431 | GO:0005813 |
| 432 | GO:0009586 |
| 433 | GO:0006497 |
| 434 | GO:0010991 |
| 435 | GO:0002767 |
| 436 | GO:0055093 |
| 437 | GO:0070483 |
| 438 | GO:0008340 |
| 439 | GO:0001890 |
| 440 | GO:0006086 |
| 441 | GO:0031702 |
| 442 | GO:0016139 |
| 443 | GO:0010764 |
| 444 | GO:0051636 |
| 445 | GO:0050746 |
| 446 | GO:0030162 |
| 447 | GO:0003723 |
| 448 | GO:0005072 |
| 449 | GO:0055106 |
| 450 | GO:0042953 |
| 451 | GO:0060509 |
| 452 | GO:0060351 |
| 453 | GO:0055102 |
| 454 | GO:2001199 |
| 455 | GO:0000461 |
| 456 | GO:0048678 |
| 457 | GO:0031616 |
| 458 | GO:0050921 |
| 459 | GO:0019835 |
| 460 | GO:0018298 |
| 461 | GO:0031953 |
| 462 | GO:0015301 |
| 463 | GO:0048598 |
| 464 | GO:0035501 |
| 465 | GO:0010466 |
| 466 | GO:0060697 |
| 467 | GO:0016817 |
| 468 | GO:0034346 |
| 469 | GO:0030532 |
| 470 | GO:0090050 |
| 471 | GO:0010934 |
| 472 | GO:0048484 |
| 473 | hsa01040   |

|     |            |
|-----|------------|
| 474 | GO:0048845 |
| 475 | GO:0048672 |
| 476 | GO:0060047 |
| 477 | GO:0003131 |
| 478 | GO:0016715 |
| 479 | GO:0005212 |
| 480 | GO:0051926 |
| 481 | GO:0009451 |
| 482 | GO:0060090 |
| 483 | GO:0019800 |
| 484 | GO:0015643 |
| 485 | GO:0001991 |
| 486 | GO:0030950 |
| 487 | GO:0060806 |
| 488 | GO:0070670 |
| 489 | GO:0048535 |
| 490 | GO:0019825 |
| 491 | GO:0008253 |
| 492 | GO:0002457 |
| 493 | GO:0051661 |
| 494 | GO:1900142 |
| 495 | GO:0007183 |
| 496 | GO:0051918 |
| 497 | GO:0035987 |
| 498 | GO:0008090 |
| 499 | GO:0008747 |
| 500 | GO:0007250 |

(7) Dataset  $D_7$

a) MaxRel features list

| Rank | Feature name |
|------|--------------|
| 1    | GO:0043537   |
| 2    | GO:0030449   |
| 3    | hsa05150     |
| 4    | GO:0005586   |
| 5    | GO:0001970   |
| 6    | GO:0035645   |
| 7    | GO:0016495   |
| 8    | GO:0034436   |
| 9    | GO:0034437   |
| 10   | GO:0034189   |
| 11   | GO:0048739   |
| 12   | GO:0048844   |

|    |            |
|----|------------|
| 13 | GO:0006956 |
| 14 | GO:0010711 |
| 15 | GO:0034103 |
| 16 | GO:0010703 |
| 17 | GO:0060311 |
| 18 | GO:0060313 |
| 19 | GO:0035767 |
| 20 | GO:1900006 |
| 21 | GO:0002575 |
| 22 | GO:0038025 |
| 23 | GO:0004962 |
| 24 | GO:0051400 |
| 25 | GO:0001798 |
| 26 | GO:0071482 |
| 27 | GO:0031109 |
| 28 | GO:0045359 |
| 29 | GO:0032432 |
| 30 | GO:0005615 |
| 31 | GO:0004944 |
| 32 | GO:0071953 |
| 33 | GO:0060754 |
| 34 | GO:0030949 |
| 35 | GO:0043331 |
| 36 | GO:0043206 |
| 37 | GO:0006958 |
| 38 | GO:0072563 |
| 39 | GO:0043171 |
| 40 | GO:0003273 |
| 41 | GO:0034447 |
| 42 | GO:0043183 |
| 43 | GO:0007497 |
| 44 | GO:0048245 |
| 45 | GO:0005581 |
| 46 | GO:0034346 |
| 47 | GO:0002282 |
| 48 | GO:0060011 |
| 49 | GO:0010001 |
| 50 | hsa04610   |
| 51 | GO:0036020 |
| 52 | GO:0045356 |
| 53 | GO:0031012 |
| 54 | GO:0043536 |
| 55 | GO:0008228 |

|    |            |
|----|------------|
| 56 | GO:0032757 |
| 57 | GO:0001300 |
| 58 | GO:0032805 |
| 59 | GO:0042088 |
| 60 | GO:0051651 |
| 61 | GO:0046911 |
| 62 | GO:0006957 |
| 63 | GO:0045766 |
| 64 | GO:0060342 |
| 65 | GO:0014043 |
| 66 | GO:0035924 |
| 67 | GO:0071222 |
| 68 | GO:0001938 |
| 69 | GO:0005172 |
| 70 | GO:0002551 |
| 71 | GO:0009597 |
| 72 | GO:0005576 |
| 73 | hsa05133   |
| 74 | GO:0014826 |
| 75 | hsa05146   |
| 76 | GO:0000302 |
| 77 | GO:0010863 |
| 78 | hsa05323   |
| 79 | GO:0004866 |
| 80 | GO:0002042 |
| 81 | GO:0043117 |
| 82 | GO:1900086 |
| 83 | GO:0034021 |
| 84 | GO:0003069 |
| 85 | GO:0043154 |
| 86 | GO:0001315 |
| 87 | GO:0045429 |
| 88 | GO:0048773 |
| 89 | GO:0019836 |
| 90 | GO:0052033 |
| 91 | GO:0010759 |
| 92 | GO:0038091 |
| 93 | GO:0006700 |
| 94 | GO:0042159 |
| 95 | GO:0001974 |
| 96 | GO:0010716 |
| 97 | GO:0032855 |
| 98 | GO:0070430 |

|     |            |
|-----|------------|
| 99  | GO:0051389 |
| 100 | GO:0002537 |
| 101 | GO:0016046 |
| 102 | GO:0032732 |
| 103 | GO:0070434 |
| 104 | GO:0051873 |
| 105 | GO:0006029 |
| 106 | GO:0051607 |
| 107 | GO:0060319 |
| 108 | GO:0032964 |
| 109 | GO:0019934 |
| 110 | GO:0042832 |
| 111 | GO:0008209 |
| 112 | GO:0033627 |
| 113 | GO:0007568 |
| 114 | GO:0001569 |
| 115 | GO:0008217 |
| 116 | GO:0005125 |
| 117 | GO:0043498 |
| 118 | GO:0042554 |
| 119 | GO:0001666 |
| 120 | GO:0021762 |
| 121 | GO:0009409 |
| 122 | GO:0031077 |
| 123 | GO:0043129 |
| 124 | GO:0050777 |
| 125 | GO:0001968 |
| 126 | GO:0010740 |
| 127 | GO:0002544 |
| 128 | GO:0032269 |
| 129 | GO:0002462 |
| 130 | GO:0001850 |
| 131 | GO:0004943 |
| 132 | GO:0004876 |
| 133 | GO:0006935 |
| 134 | GO:0060394 |
| 135 | GO:0030195 |
| 136 | GO:0048845 |
| 137 | GO:0048407 |
| 138 | GO:2001028 |
| 139 | GO:0006940 |
| 140 | GO:0051856 |
| 141 | GO:0070373 |



|     |            |
|-----|------------|
| 142 | GO:0032467 |
| 143 | GO:0002446 |
| 144 | GO:0030198 |
| 145 | GO:0001957 |
| 146 | GO:0045671 |
| 147 | GO:0055093 |
| 148 | GO:0042060 |
| 149 | GO:0071346 |
| 150 | GO:0070541 |
| 151 | GO:0038026 |
| 152 | GO:0009881 |
| 153 | GO:0005161 |
| 154 | GO:0042583 |
| 155 | GO:0002548 |
| 156 | GO:0022617 |
| 157 | GO:0004175 |
| 158 | GO:0032463 |
| 159 | GO:0061045 |
| 160 | GO:0046813 |
| 161 | GO:0045541 |
| 162 | GO:0010466 |
| 163 | GO:0004784 |
| 164 | GO:0035665 |
| 165 | GO:2000340 |
| 166 | GO:0035663 |
| 167 | GO:0032738 |
| 168 | GO:0004509 |
| 169 | GO:0035662 |
| 170 | GO:0019826 |
| 171 | GO:0051142 |
| 172 | GO:0010575 |
| 173 | GO:0005534 |
| 174 | GO:0051894 |
| 175 | GO:0042660 |
| 176 | GO:0042116 |
| 177 | GO:0021517 |
| 178 | GO:0060527 |
| 179 | GO:0030828 |
| 180 | GO:0050665 |
| 181 | GO:0032930 |
| 182 | GO:0007179 |
| 183 | GO:0033364 |
| 184 | GO:0005585 |

|     |            |
|-----|------------|
| 185 | GO:0006917 |
| 186 | GO:0009611 |
| 187 | GO:0051659 |
| 188 | GO:0048246 |
| 189 | GO:0005178 |
| 190 | GO:0019064 |
| 191 | GO:0043184 |
| 192 | GO:0051881 |
| 193 | GO:0090050 |
| 194 | GO:0005010 |
| 195 | GO:0050921 |
| 196 | GO:0032700 |
| 197 | GO:0042095 |
| 198 | GO:0033141 |
| 199 | GO:0009408 |
| 200 | GO:0060346 |
| 201 | GO:0032809 |
| 202 | GO:0030593 |
| 203 | GO:0048010 |
| 204 | GO:2000256 |
| 205 | GO:0070483 |
| 206 | GO:0042033 |
| 207 | GO:0007256 |
| 208 | GO:0007263 |
| 209 | GO:0042253 |
| 210 | GO:0042231 |
| 211 | GO:0030335 |
| 212 | GO:0002429 |
| 213 | GO:0046629 |
| 214 | GO:0034154 |
| 215 | GO:0002457 |
| 216 | GO:0070301 |
| 217 | GO:0001910 |
| 218 | GO:0002693 |
| 219 | GO:0032958 |
| 220 | GO:0007565 |
| 221 | GO:0070371 |
| 222 | GO:0010477 |
| 223 | GO:0002523 |
| 224 | GO:0010875 |
| 225 | GO:0030023 |
| 226 | GO:0035988 |
| 227 | hsa05140   |

|     |            |
|-----|------------|
| 228 | GO:0051918 |
| 229 | GO:0071260 |
| 230 | GO:0046010 |
| 231 | GO:0006955 |
| 232 | GO:0034185 |
| 233 | GO:0034363 |
| 234 | GO:0032364 |
| 235 | GO:0005072 |
| 236 | GO:0045103 |
| 237 | hsa05143   |
| 238 | GO:0001937 |
| 239 | GO:0001955 |
| 240 | GO:0060312 |
| 241 | GO:0030247 |
| 242 | GO:0048598 |
| 243 | GO:0090031 |
| 244 | GO:0060068 |
| 245 | GO:0051272 |
| 246 | GO:0043200 |
| 247 | GO:0008009 |
| 248 | GO:0050927 |
| 249 | GO:0006801 |
| 250 | GO:0010763 |
| 251 | GO:0031701 |
| 252 | GO:0010595 |
| 253 | GO:0004950 |
| 254 | GO:0030020 |
| 255 | GO:0048565 |
| 256 | GO:0048009 |
| 257 | GO:0031017 |
| 258 | GO:0060129 |
| 259 | GO:0071356 |
| 260 | GO:0048251 |
| 261 | GO:2000121 |
| 262 | GO:0072573 |
| 263 | GO:0070429 |
| 264 | GO:0033192 |
| 265 | GO:2000349 |
| 266 | GO:0070433 |
| 267 | GO:0034148 |
| 268 | GO:0061043 |
| 269 | GO:0034056 |
| 270 | GO:0060729 |

|     |            |
|-----|------------|
| 271 | GO:0019049 |
| 272 | GO:0072332 |
| 273 | GO:0000189 |
| 274 | GO:0051000 |
| 275 | GO:0009441 |
| 276 | GO:0014896 |
| 277 | GO:0014904 |
| 278 | GO:2001199 |
| 279 | GO:0004252 |
| 280 | GO:0002767 |
| 281 | GO:0032497 |
| 282 | GO:0042092 |
| 283 | GO:0033552 |
| 284 | GO:0048661 |
| 285 | GO:0060763 |
| 286 | GO:0032722 |
| 287 | GO:0007183 |
| 288 | GO:0030229 |
| 289 | GO:0034393 |
| 290 | GO:0002758 |
| 291 | GO:0000303 |
| 292 | GO:0060128 |
| 293 | GO:0051280 |
| 294 | GO:0050953 |
| 295 | GO:0045768 |
| 296 | hsa05142   |
| 297 | GO:0014065 |
| 298 | GO:0032816 |
| 299 | GO:0003417 |
| 300 | GO:0034505 |
| 301 | GO:0008083 |
| 302 | GO:0071347 |
| 303 | GO:0046620 |
| 304 | GO:0048678 |
| 305 | GO:0071351 |
| 306 | GO:0031798 |
| 307 | GO:2000309 |
| 308 | GO:0044146 |
| 309 | GO:0060509 |
| 310 | GO:0060550 |
| 311 | GO:0060552 |
| 312 | GO:0051898 |
| 313 | GO:0038052 |

|     |            |
|-----|------------|
| 314 | GO:0030214 |
| 315 | GO:0060745 |
| 316 | GO:0042953 |
| 317 | GO:0016209 |
| 318 | GO:0042612 |
| 319 | GO:0007181 |
| 320 | GO:0048185 |
| 321 | GO:0045869 |
| 322 | GO:0005044 |
| 323 | GO:0060697 |
| 324 | GO:0010760 |
| 325 | GO:0031714 |
| 326 | GO:0005579 |
| 327 | GO:2000502 |
| 328 | GO:0042310 |
| 329 | GO:0030199 |
| 330 | GO:0061302 |
| 331 | GO:0035684 |
| 332 | GO:0070051 |
| 333 | GO:0019882 |
| 334 | GO:0005201 |
| 335 | GO:0042493 |
| 336 | GO:0042056 |
| 337 | GO:0010625 |
| 338 | GO:0044464 |
| 339 | GO:0051098 |
| 340 | GO:0051580 |
| 341 | GO:0014910 |
| 342 | GO:0009612 |
| 343 | GO:0033591 |
| 344 | GO:0001872 |
| 345 | GO:0019430 |
| 346 | GO:0060351 |
| 347 | hsa05020   |
| 348 | GO:2000379 |
| 349 | GO:0022009 |
| 350 | GO:0045348 |
| 351 | GO:0032270 |
| 352 | GO:0032695 |
| 353 | GO:0032943 |
| 354 | GO:0045084 |
| 355 | GO:0070091 |
| 356 | GO:0033081 |

|     |            |
|-----|------------|
| 357 | GO:0090037 |
| 358 | GO:0005006 |
| 359 | GO:0060644 |
| 360 | GO:0035630 |
| 361 | GO:0002262 |
| 362 | GO:0031953 |
| 363 | GO:0071361 |
| 364 | GO:0010764 |
| 365 | GO:0051001 |
| 366 | GO:0060749 |
| 367 | GO:0009583 |
| 368 | GO:0090197 |
| 369 | GO:0002666 |
| 370 | GO:0002218 |
| 371 | GO:0048535 |
| 372 | GO:0051591 |
| 373 | hsa05144   |
| 374 | GO:0050728 |
| 375 | GO:0005520 |
| 376 | GO:0016004 |
| 377 | GO:0009615 |
| 378 | GO:0060220 |
| 379 | GO:0048074 |
| 380 | GO:0010902 |
| 381 | GO:0008061 |
| 382 | GO:0002532 |
| 383 | GO:0016525 |
| 384 | GO:0043410 |
| 385 | GO:0035458 |
| 386 | GO:0010811 |
| 387 | GO:0031663 |
| 388 | GO:2000427 |
| 389 | GO:0005578 |
| 390 | GO:0050766 |
| 391 | GO:0045740 |
| 392 | GO:0015643 |
| 393 | GO:0060020 |
| 394 | GO:0030284 |
| 395 | GO:0033160 |
| 396 | GO:0043388 |
| 397 | GO:0030516 |
| 398 | GO:0030346 |
| 399 | GO:0001781 |

|     |            |
|-----|------------|
| 400 | GO:0009314 |
| 401 | GO:0051926 |
| 402 | GO:0055094 |
| 403 | GO:0008191 |
| 404 | GO:0008201 |
| 405 | GO:0030169 |
| 406 | GO:0009749 |
| 407 | hsa04620   |
| 408 | GO:0001503 |
| 409 | GO:0006290 |
| 410 | GO:0007252 |
| 411 | GO:0001946 |
| 412 | GO:0070098 |
| 413 | GO:0010751 |
| 414 | GO:0010754 |
| 415 | GO:0008395 |
| 416 | GO:0002581 |
| 417 | GO:0002605 |
| 418 | GO:0071312 |
| 419 | GO:0021940 |
| 420 | GO:0035066 |
| 421 | GO:0005537 |
| 422 | GO:0071062 |
| 423 | GO:0010544 |
| 424 | GO:0071230 |
| 425 | GO:0045765 |
| 426 | GO:0071359 |
| 427 | GO:0050714 |
| 428 | GO:0005114 |
| 429 | GO:0070670 |
| 430 | GO:0005577 |
| 431 | GO:0045906 |
| 432 | GO:0060137 |
| 433 | GO:0008285 |
| 434 | GO:0043277 |
| 435 | GO:0002456 |
| 436 | GO:0050829 |
| 437 | GO:0048662 |
| 438 | GO:0001786 |
| 439 | GO:0007569 |
| 440 | hsa05219   |
| 441 | GO:0045188 |
| 442 | GO:0003340 |

|     |            |
|-----|------------|
| 443 | GO:2000669 |
| 444 | GO:0070206 |
| 445 | GO:0004906 |
| 446 | GO:0055090 |
| 447 | GO:0034382 |
| 448 | GO:0034137 |
| 449 | GO:0030166 |
| 450 | GO:0008090 |
| 451 | GO:0002291 |
| 452 | GO:0045630 |
| 453 | GO:0030279 |
| 454 | GO:0002021 |
| 455 | GO:0070022 |
| 456 | GO:0060591 |
| 457 | GO:0009897 |
| 458 | GO:0032494 |
| 459 | GO:0031727 |
| 460 | GO:0008236 |
| 461 | GO:0031702 |
| 462 | GO:0072593 |
| 463 | GO:0002062 |
| 464 | GO:0090265 |
| 465 | GO:0032735 |
| 466 | GO:0032874 |
| 467 | GO:0019062 |
| 468 | GO:0060279 |
| 469 | GO:0030171 |
| 470 | GO:0043153 |
| 471 | GO:0097186 |
| 472 | GO:0051454 |
| 473 | GO:0009590 |
| 474 | GO:0046795 |
| 475 | GO:0046649 |
| 476 | GO:0071547 |
| 477 | GO:0006746 |
| 478 | GO:0070287 |
| 479 | GO:0000003 |
| 480 | GO:0050840 |
| 481 | GO:0032717 |
| 482 | GO:0048247 |
| 483 | GO:0005584 |
| 484 | GO:0005548 |
| 485 | GO:0071223 |



|     |            |
|-----|------------|
| 486 | GO:0017134 |
| 487 | GO:0010512 |
| 488 | GO:0001922 |
| 489 | GO:0031093 |
| 490 | GO:0002520 |
| 491 | GO:0007603 |
| 492 | hsa04672   |
| 493 | GO:0071374 |
| 494 | GO:0043066 |
| 495 | GO:0060325 |
| 496 | GO:0034145 |
| 497 | GO:0030704 |
| 498 | GO:0060545 |
| 499 | GO:0019835 |
| 500 | GO:0001991 |

b) mRMR features list

| Rank | Feature name |
|------|--------------|
| 1    | GO:0043537   |
| 2    | hsa05150     |
| 3    | GO:0005586   |
| 4    | GO:0030449   |
| 5    | GO:0048739   |
| 6    | GO:0005581   |
| 7    | GO:0006956   |
| 8    | GO:0035767   |
| 9    | GO:0035645   |
| 10   | GO:0002429   |
| 11   | GO:0051873   |
| 12   | GO:0048844   |
| 13   | GO:0006958   |
| 14   | GO:0031012   |
| 15   | GO:0071482   |
| 16   | GO:0034436   |
| 17   | GO:0006029   |
| 18   | GO:0001970   |
| 19   | GO:0004509   |
| 20   | GO:0060754   |
| 21   | GO:0008228   |
| 22   | GO:0043171   |
| 23   | GO:0046629   |
| 24   | GO:0004944   |
| 25   | GO:0002446   |

|    |            |
|----|------------|
| 26 | GO:0016495 |
| 27 | GO:0033192 |
| 28 | hsa04610   |
| 29 | GO:0035924 |
| 30 | GO:0034437 |
| 31 | hsa05146   |
| 32 | GO:0060011 |
| 33 | GO:0042612 |
| 34 | GO:0006957 |
| 35 | GO:0032964 |
| 36 | GO:0043206 |
| 37 | GO:0019064 |
| 38 | GO:0010759 |
| 39 | GO:0005585 |
| 40 | GO:0014826 |
| 41 | GO:0010740 |
| 42 | GO:0004866 |
| 43 | GO:0034189 |
| 44 | GO:0007179 |
| 45 | hsa05133   |
| 46 | GO:0006700 |
| 47 | GO:0036020 |
| 48 | GO:0031701 |
| 49 | GO:0000302 |
| 50 | GO:0002462 |
| 51 | GO:0019882 |
| 52 | GO:0010001 |
| 53 | GO:0001968 |
| 54 | GO:0043331 |
| 55 | GO:0042583 |
| 56 | GO:0001798 |
| 57 | GO:0030020 |
| 58 | GO:1900006 |
| 59 | GO:0019826 |
| 60 | GO:0071777 |
| 61 | GO:0001850 |
| 62 | GO:0045356 |
| 63 | GO:0048407 |
| 64 | GO:0000003 |
| 65 | GO:0004175 |
| 66 | GO:0007497 |
| 67 | GO:0008395 |
| 68 | GO:0050777 |

|     |            |
|-----|------------|
| 69  | GO:0045359 |
| 70  | GO:0004943 |
| 71  | GO:0038091 |
| 72  | GO:0008236 |
| 73  | GO:0030023 |
| 74  | GO:0030247 |
| 75  | GO:0035988 |
| 76  | GO:0004962 |
| 77  | GO:2001199 |
| 78  | GO:0002042 |
| 79  | GO:0038025 |
| 80  | GO:0004876 |
| 81  | GO:0002544 |
| 82  | GO:0009597 |
| 83  | GO:0070287 |
| 84  | GO:0038063 |
| 85  | GO:0001974 |
| 86  | GO:1900086 |
| 87  | GO:0010711 |
| 88  | GO:0051272 |
| 89  | GO:0043229 |
| 90  | GO:0005537 |
| 91  | GO:0071953 |
| 92  | GO:0002767 |
| 93  | GO:0043536 |
| 94  | GO:0051881 |
| 95  | GO:0043153 |
| 96  | GO:0034103 |
| 97  | GO:0001957 |
| 98  | GO:0019836 |
| 99  | GO:0072573 |
| 100 | GO:0010703 |
| 101 | GO:0072384 |
| 102 | GO:0060841 |
| 103 | GO:0048535 |
| 104 | GO:0060311 |
| 105 | GO:0097186 |
| 106 | GO:0060394 |
| 107 | GO:0005044 |
| 108 | GO:0031077 |
| 109 | GO:0060313 |
| 110 | GO:0009749 |
| 111 | GO:0051607 |

|     |            |
|-----|------------|
| 112 | GO:0007603 |
| 113 | GO:0002820 |
| 114 | GO:0005576 |
| 115 | GO:0090050 |
| 116 | GO:0070429 |
| 117 | GO:0003828 |
| 118 | GO:0031109 |
| 119 | GO:0010763 |
| 120 | GO:0051400 |
| 121 | GO:0005588 |
| 122 | GO:0070206 |
| 123 | GO:0010863 |
| 124 | GO:0031362 |
| 125 | GO:0016209 |
| 126 | GO:0006940 |
| 127 | GO:0070052 |
| 128 | GO:0032757 |
| 129 | GO:2000349 |
| 130 | GO:0002575 |
| 131 | GO:0034122 |
| 132 | GO:0004252 |
| 133 | GO:0032432 |
| 134 | GO:0002666 |
| 135 | GO:0007181 |
| 136 | GO:0005615 |
| 137 | GO:0019835 |
| 138 | GO:0019934 |
| 139 | GO:0070433 |
| 140 | GO:0005201 |
| 141 | GO:2001028 |
| 142 | GO:0016362 |
| 143 | GO:0060342 |
| 144 | GO:0034154 |
| 145 | GO:0035624 |
| 146 | GO:0042554 |
| 147 | GO:0038062 |
| 148 | GO:0034148 |
| 149 | GO:0030949 |
| 150 | GO:0007183 |
| 151 | GO:0035665 |
| 152 | GO:0042613 |
| 153 | GO:0042088 |
| 154 | GO:0000254 |

|     |            |
|-----|------------|
| 155 | GO:0005577 |
| 156 | GO:0033364 |
| 157 | GO:0061043 |
| 158 | GO:0072563 |
| 159 | GO:0006705 |
| 160 | GO:2000340 |
| 161 | GO:0034447 |
| 162 | GO:0010760 |
| 163 | GO:0060220 |
| 164 | GO:0043117 |
| 165 | GO:0050921 |
| 166 | GO:0051683 |
| 167 | GO:0034365 |
| 168 | GO:0034021 |
| 169 | GO:0001946 |
| 170 | GO:0014043 |
| 171 | GO:0030199 |
| 172 | GO:0035663 |
| 173 | GO:0005172 |
| 174 | GO:0031714 |
| 175 | GO:0002504 |
| 176 | GO:0032738 |
| 177 | GO:0060744 |
| 178 | GO:0032463 |
| 179 | GO:0048245 |
| 180 | GO:0048074 |
| 181 | GO:0035662 |
| 182 | GO:0009881 |
| 183 | GO:0051098 |
| 184 | hsa05323   |
| 185 | GO:0001574 |
| 186 | GO:0038026 |
| 187 | GO:0001867 |
| 188 | GO:0061302 |
| 189 | GO:0032816 |
| 190 | GO:0002282 |
| 191 | GO:0015722 |
| 192 | GO:0070051 |
| 193 | GO:0005579 |
| 194 | GO:0071168 |
| 195 | GO:0005161 |
| 196 | GO:0003069 |
| 197 | GO:0035082 |

|     |            |
|-----|------------|
| 198 | GO:0008217 |
| 199 | GO:0033627 |
| 200 | GO:0043183 |
| 201 | GO:0060279 |
| 202 | GO:0008187 |
| 203 | GO:0034346 |
| 204 | GO:0060706 |
| 205 | GO:0005010 |
| 206 | GO:0051280 |
| 207 | GO:0060697 |
| 208 | GO:0072686 |
| 209 | GO:0043184 |
| 210 | GO:0060765 |
| 211 | GO:0001300 |
| 212 | GO:0045423 |
| 213 | GO:0001569 |
| 214 | GO:0034605 |
| 215 | GO:0008209 |
| 216 | GO:0004169 |
| 217 | GO:0050689 |
| 218 | GO:2000669 |
| 219 | GO:0001315 |
| 220 | GO:0051148 |
| 221 | GO:0043129 |
| 222 | GO:0072332 |
| 223 | GO:0010189 |
| 224 | GO:0022617 |
| 225 | GO:0070584 |
| 226 | GO:0042953 |
| 227 | GO:0002523 |
| 228 | GO:0071222 |
| 229 | GO:0051894 |
| 230 | GO:0060052 |
| 231 | GO:0046548 |
| 232 | GO:0045869 |
| 233 | GO:0048773 |
| 234 | GO:0003417 |
| 235 | GO:0010501 |
| 236 | GO:0061045 |
| 237 | GO:0045414 |
| 238 | GO:0006704 |
| 239 | GO:0003273 |
| 240 | hsa04974   |

|     |            |
|-----|------------|
| 241 | GO:0030621 |
| 242 | GO:0032269 |
| 243 | GO:0001786 |
| 244 | GO:0060123 |
| 245 | GO:0031491 |
| 246 | GO:0030198 |
| 247 | GO:0002551 |
| 248 | GO:0055090 |
| 249 | GO:0060319 |
| 250 | GO:0002480 |
| 251 | GO:0070815 |
| 252 | GO:0010466 |
| 253 | GO:0034755 |
| 254 | GO:0006935 |
| 255 | GO:0045953 |
| 256 | GO:0030195 |
| 257 | GO:0050766 |
| 258 | GO:0018395 |
| 259 | GO:0050927 |
| 260 | GO:0010751 |
| 261 | GO:0010902 |
| 262 | GO:0044140 |
| 263 | GO:0009615 |
| 264 | GO:0019049 |
| 265 | GO:0051389 |
| 266 | GO:0070078 |
| 267 | GO:0051653 |
| 268 | GO:0032855 |
| 269 | GO:0007263 |
| 270 | GO:0060806 |
| 271 | GO:0001727 |
| 272 | GO:0033691 |
| 273 | GO:0042159 |
| 274 | GO:0010700 |
| 275 | GO:0032695 |
| 276 | GO:0010991 |
| 277 | GO:0033005 |
| 278 | GO:0060068 |
| 279 | GO:0050953 |
| 280 | GO:0070079 |
| 281 | GO:0010754 |
| 282 | GO:0032090 |
| 283 | GO:0052033 |

|     |            |
|-----|------------|
| 284 | GO:0043509 |
| 285 | GO:0032805 |
| 286 | GO:0005582 |
| 287 | GO:0046834 |
| 288 | GO:0060346 |
| 289 | GO:0033749 |
| 290 | GO:0030496 |
| 291 | GO:0070541 |
| 292 | GO:0007184 |
| 293 | GO:0042701 |
| 294 | GO:0048010 |
| 295 | GO:0004906 |
| 296 | GO:0051651 |
| 297 | GO:0021681 |
| 298 | GO:0043654 |
| 299 | GO:0004222 |
| 300 | GO:0046649 |
| 301 | GO:0032364 |
| 302 | GO:0046880 |
| 303 | GO:0033746 |
| 304 | GO:0070373 |
| 305 | GO:0042461 |
| 306 | GO:0002581 |
| 307 | GO:0046911 |
| 308 | GO:0005125 |
| 309 | GO:0045254 |
| 310 | GO:0051918 |
| 311 | GO:0006741 |
| 312 | GO:0001938 |
| 313 | GO:0030054 |
| 314 | GO:0010875 |
| 315 | GO:0008191 |
| 316 | GO:0060527 |
| 317 | GO:0009893 |
| 318 | GO:0006438 |
| 319 | GO:0043154 |
| 320 | GO:0060229 |
| 321 | GO:0042310 |
| 322 | GO:0017134 |
| 323 | GO:0032510 |
| 324 | GO:0003823 |
| 325 | GO:0031953 |
| 326 | GO:0045309 |



|     |            |
|-----|------------|
| 327 | GO:0060090 |
| 328 | GO:0045116 |
| 329 | GO:0021517 |
| 330 | GO:0002605 |
| 331 | GO:0042116 |
| 332 | GO:0007568 |
| 333 | GO:0045494 |
| 334 | GO:0004832 |
| 335 | GO:0060681 |
| 336 | GO:0045209 |
| 337 | GO:0030171 |
| 338 | GO:0071529 |
| 339 | GO:0070050 |
| 340 | GO:0030214 |
| 341 | GO:0009409 |
| 342 | GO:0045204 |
| 343 | GO:0006168 |
| 344 | GO:0071253 |
| 345 | GO:0046332 |
| 346 | GO:0070430 |
| 347 | GO:0031616 |
| 348 | GO:0048565 |
| 349 | GO:0097193 |
| 350 | GO:0051454 |
| 351 | GO:0045766 |
| 352 | GO:0034145 |
| 353 | GO:0006746 |
| 354 | GO:0019062 |
| 355 | GO:0010369 |
| 356 | GO:0008312 |
| 357 | GO:0015126 |
| 358 | GO:0002537 |
| 359 | GO:0072163 |
| 360 | GO:0010455 |
| 361 | GO:0046795 |
| 362 | GO:0051659 |
| 363 | GO:0006290 |
| 364 | GO:0030169 |
| 365 | GO:0010575 |
| 366 | GO:0055093 |
| 367 | GO:0034363 |
| 368 | GO:0010454 |
| 369 | GO:0043277 |

|     |            |
|-----|------------|
| 370 | GO:0055087 |
| 371 | GO:0004784 |
| 372 | GO:0090207 |
| 373 | GO:0006917 |
| 374 | GO:0003987 |
| 375 | GO:0010716 |
| 376 | GO:0015432 |
| 377 | GO:0042060 |
| 378 | GO:0003854 |
| 379 | GO:0002430 |
| 380 | GO:0016046 |
| 381 | GO:0046947 |
| 382 | GO:0000930 |
| 383 | GO:0008237 |
| 384 | GO:0032467 |
| 385 | GO:0044241 |
| 386 | GO:0002548 |
| 387 | GO:0008241 |
| 388 | GO:0008475 |
| 389 | GO:0042267 |
| 390 | GO:0032930 |
| 391 | GO:0008554 |
| 392 | GO:0032637 |
| 393 | GO:0005592 |
| 394 | GO:0005178 |
| 395 | GO:0032732 |
| 396 | GO:0001578 |
| 397 | GO:0005583 |
| 398 | GO:0002032 |
| 399 | GO:0001844 |
| 400 | GO:0003085 |
| 401 | GO:0051856 |
| 402 | GO:0006801 |
| 403 | GO:0030704 |
| 404 | GO:0070633 |
| 405 | GO:0030574 |
| 406 | GO:0046010 |
| 407 | GO:0003429 |
| 408 | GO:0090037 |
| 409 | GO:0004473 |
| 410 | GO:0070434 |
| 411 | GO:0005602 |
| 412 | GO:0008354 |

|     |            |
|-----|------------|
| 413 | GO:0010498 |
| 414 | GO:0055106 |
| 415 | GO:0090101 |
| 416 | GO:0032691 |
| 417 | GO:0034137 |
| 418 | GO:0042832 |
| 419 | GO:0034361 |
| 420 | GO:1900165 |
| 421 | GO:0005114 |
| 422 | GO:0043394 |
| 423 | GO:0005534 |
| 424 | GO:0043178 |
| 425 | GO:0050665 |
| 426 | GO:0048593 |
| 427 | GO:0015355 |
| 428 | GO:0005520 |
| 429 | GO:0019962 |
| 430 | GO:0004950 |
| 431 | GO:0010917 |
| 432 | GO:0001955 |
| 433 | GO:0034382 |
| 434 | GO:1900142 |
| 435 | GO:0071547 |
| 436 | GO:0033299 |
| 437 | GO:0048246 |
| 438 | GO:0033116 |
| 439 | GO:0048185 |
| 440 | GO:0032909 |
| 441 | GO:0004905 |
| 442 | GO:0043064 |
| 443 | GO:0006710 |
| 444 | GO:0030279 |
| 445 | GO:0046813 |
| 446 | GO:0032809 |
| 447 | GO:0008277 |
| 448 | GO:0003131 |
| 449 | GO:0043498 |
| 450 | GO:0000910 |
| 451 | GO:0002262 |
| 452 | GO:0060351 |
| 453 | GO:0043159 |
| 454 | GO:0042462 |
| 455 | GO:0060370 |

|     |            |
|-----|------------|
| 456 | GO:0050711 |
| 457 | GO:0009583 |
| 458 | GO:0032717 |
| 459 | GO:0032943 |
| 460 | GO:0021678 |
| 461 | GO:0048845 |
| 462 | GO:0009590 |
| 463 | GO:0008200 |
| 464 | GO:0035987 |
| 465 | GO:0019439 |
| 466 | GO:0005578 |
| 467 | GO:0032481 |
| 468 | GO:0010934 |
| 469 | GO:0051654 |
| 470 | GO:0001666 |
| 471 | GO:0048273 |
| 472 | GO:0032784 |
| 473 | GO:0051591 |
| 474 | GO:0035473 |
| 475 | GO:0045671 |
| 476 | GO:0045076 |
| 477 | GO:0033602 |
| 478 | GO:0001937 |
| 479 | GO:0061153 |
| 480 | GO:0005584 |
| 481 | GO:0030346 |
| 482 | GO:0032497 |
| 483 | GO:0071158 |
| 484 | GO:0034056 |
| 485 | GO:0071208 |
| 486 | GO:0005604 |
| 487 | GO:0009611 |
| 488 | GO:0046814 |
| 489 | GO:0070722 |
| 490 | GO:0071260 |
| 491 | GO:0050728 |
| 492 | GO:0016922 |
| 493 | GO:0007256 |
| 494 | GO:2000533 |
| 495 | GO:0090321 |
| 496 | GO:0071622 |
| 497 | GO:0001848 |
| 498 | GO:0045906 |

|     |            |
|-----|------------|
| 499 | GO:0014909 |
| 500 | GO:0071346 |

(8) Dataset  $D_8$

a) MaxRel features list

| Rank | Feature name |
|------|--------------|
| 1    | GO:0030449   |
| 2    | GO:0034189   |
| 3    | GO:0034437   |
| 4    | GO:0034436   |
| 5    | GO:0038025   |
| 6    | GO:0006956   |
| 7    | GO:0071482   |
| 8    | GO:0035645   |
| 9    | hsa04610     |
| 10   | hsa05150     |
| 11   | GO:0001970   |
| 12   | GO:0006958   |
| 13   | GO:0034447   |
| 14   | GO:0016495   |
| 15   | GO:0071953   |
| 16   | GO:0006957   |
| 17   | GO:0008228   |
| 18   | GO:0004962   |
| 19   | GO:0060342   |
| 20   | GO:0032805   |
| 21   | GO:0051651   |
| 22   | GO:0046911   |
| 23   | GO:0045359   |
| 24   | GO:0010711   |
| 25   | GO:0060311   |
| 26   | GO:0038026   |
| 27   | GO:0034103   |
| 28   | GO:0032463   |
| 29   | GO:0060313   |
| 30   | GO:0010703   |
| 31   | GO:0051400   |
| 32   | GO:0014043   |
| 33   | GO:0090031   |
| 34   | GO:0034185   |
| 35   | GO:0043536   |
| 36   | GO:0001798   |
| 37   | GO:0060011   |

|    |            |
|----|------------|
| 38 | GO:0032467 |
| 39 | GO:0051389 |
| 40 | GO:0031109 |
| 41 | GO:0042583 |
| 42 | GO:0042088 |
| 43 | GO:0048773 |
| 44 | GO:0001315 |
| 45 | GO:0051000 |
| 46 | GO:0034021 |
| 47 | GO:0003069 |
| 48 | GO:0033364 |
| 49 | GO:0042159 |
| 50 | GO:2001028 |
| 51 | GO:0043537 |
| 52 | GO:0007497 |
| 53 | GO:0001938 |
| 54 | GO:0003273 |
| 55 | GO:0004944 |
| 56 | GO:0021762 |
| 57 | GO:0060228 |
| 58 | GO:0045103 |
| 59 | GO:0034346 |
| 60 | GO:0043183 |
| 61 | GO:0002575 |
| 62 | GO:0051856 |
| 63 | GO:0005172 |
| 64 | GO:0043498 |
| 65 | GO:0032855 |
| 66 | GO:0051580 |
| 67 | GO:0010625 |
| 68 | GO:0044464 |
| 69 | GO:0051898 |
| 70 | GO:0060754 |
| 71 | GO:0043117 |
| 72 | GO:1900006 |
| 73 | GO:0004943 |
| 74 | GO:0004876 |
| 75 | GO:0001850 |
| 76 | GO:0002462 |
| 77 | GO:0045766 |
| 78 | GO:0043331 |
| 79 | GO:0032809 |
| 80 | GO:0071222 |

|     |            |
|-----|------------|
| 81  | GO:0045429 |
| 82  | GO:0050665 |
| 83  | GO:0001300 |
| 84  | GO:0002262 |
| 85  | GO:0061302 |
| 86  | GO:0032432 |
| 87  | GO:0019836 |
| 88  | GO:0030229 |
| 89  | GO:0004866 |
| 90  | GO:0008209 |
| 91  | GO:0042660 |
| 92  | GO:0030235 |
| 93  | GO:0033081 |
| 94  | GO:0009409 |
| 95  | GO:0048844 |
| 96  | GO:1900086 |
| 97  | GO:0019430 |
| 98  | GO:0000303 |
| 99  | GO:0032757 |
| 100 | GO:0035624 |
| 101 | GO:0042832 |
| 102 | GO:0002282 |
| 103 | GO:2000256 |
| 104 | GO:0042231 |
| 105 | GO:0042033 |
| 106 | GO:0042253 |
| 107 | GO:0009881 |
| 108 | GO:0052033 |
| 109 | GO:0070430 |
| 110 | GO:0002537 |
| 111 | GO:0016046 |
| 112 | GO:0070434 |
| 113 | GO:0045541 |
| 114 | GO:0042095 |
| 115 | GO:0032732 |
| 116 | GO:0048598 |
| 117 | GO:0030949 |
| 118 | GO:0048246 |
| 119 | GO:0009583 |
| 120 | GO:0006290 |
| 121 | GO:0000302 |
| 122 | GO:0046813 |
| 123 | GO:0019934 |

|     |            |
|-----|------------|
| 124 | GO:0060319 |
| 125 | GO:0005072 |
| 126 | GO:0033627 |
| 127 | GO:0021517 |
| 128 | GO:0060129 |
| 129 | GO:0001910 |
| 130 | GO:0032700 |
| 131 | GO:0002693 |
| 132 | GO:0010477 |
| 133 | GO:0004784 |
| 134 | GO:0002457 |
| 135 | GO:0050777 |
| 136 | GO:0032958 |
| 137 | GO:0072563 |
| 138 | GO:0034405 |
| 139 | GO:0002042 |
| 140 | GO:0030023 |
| 141 | GO:0060312 |
| 142 | GO:0051881 |
| 143 | GO:0001569 |
| 144 | GO:0050766 |
| 145 | GO:0051272 |
| 146 | GO:0035924 |
| 147 | GO:0046620 |
| 148 | GO:0072332 |
| 149 | GO:0010001 |
| 150 | GO:0031798 |
| 151 | GO:0038052 |
| 152 | GO:0004252 |
| 153 | GO:0055093 |
| 154 | GO:0048661 |
| 155 | GO:0060346 |
| 156 | GO:0048245 |
| 157 | GO:0002551 |
| 158 | GO:0060052 |
| 159 | GO:0008089 |
| 160 | GO:0031017 |
| 161 | GO:0060128 |
| 162 | GO:0048845 |
| 163 | GO:0048009 |
| 164 | GO:0009408 |
| 165 | GO:0001895 |
| 166 | GO:0010875 |



|     |            |
|-----|------------|
| 167 | GO:0048018 |
| 168 | GO:0007256 |
| 169 | GO:0014826 |
| 170 | GO:0070541 |
| 171 | GO:0042094 |
| 172 | GO:0000189 |
| 173 | GO:0035630 |
| 174 | GO:0090037 |
| 175 | GO:0009441 |
| 176 | GO:0014904 |
| 177 | GO:0014896 |
| 178 | GO:0060744 |
| 179 | GO:0019064 |
| 180 | GO:0002429 |
| 181 | GO:0046629 |
| 182 | GO:0009597 |
| 183 | GO:0046907 |
| 184 | GO:0070670 |
| 185 | GO:0042462 |
| 186 | GO:0030346 |
| 187 | GO:0003823 |
| 188 | GO:0071813 |
| 189 | GO:0071346 |
| 190 | GO:0055106 |
| 191 | GO:0018242 |
| 192 | GO:0018243 |
| 193 | GO:0010466 |
| 194 | GO:0050921 |
| 195 | GO:0002291 |
| 196 | GO:0051894 |
| 197 | GO:2000121 |
| 198 | GO:0048678 |
| 199 | GO:0032497 |
| 200 | GO:0017158 |
| 201 | GO:0007603 |
| 202 | GO:0007584 |
| 203 | GO:0005586 |
| 204 | GO:0014911 |
| 205 | GO:0006801 |
| 206 | GO:0032510 |
| 207 | GO:0033700 |
| 208 | GO:0006707 |
| 209 | GO:0031102 |

|     |            |
|-----|------------|
| 210 | GO:0004175 |
| 211 | GO:0070326 |
| 212 | GO:0051712 |
| 213 | GO:0006940 |
| 214 | GO:0008090 |
| 215 | GO:0043200 |
| 216 | GO:0003032 |
| 217 | GO:0032364 |
| 218 | GO:0031954 |
| 219 | GO:0030247 |
| 220 | GO:0061045 |
| 221 | GO:0008395 |
| 222 | GO:0008236 |
| 223 | GO:0007181 |
| 224 | GO:0033299 |
| 225 | GO:0015920 |
| 226 | GO:0060745 |
| 227 | GO:0048739 |
| 228 | GO:0021940 |
| 229 | GO:0005010 |
| 230 | GO:0071062 |
| 231 | GO:0001666 |
| 232 | GO:0051918 |
| 233 | GO:0060763 |
| 234 | GO:0001937 |
| 235 | GO:0032722 |
| 236 | GO:0010863 |
| 237 | GO:0005615 |
| 238 | GO:0060509 |
| 239 | GO:0033141 |
| 240 | GO:0060020 |
| 241 | GO:0031714 |
| 242 | GO:0010760 |
| 243 | GO:0001867 |
| 244 | GO:0035082 |
| 245 | GO:0070373 |
| 246 | GO:0060527 |
| 247 | GO:0070301 |
| 248 | GO:0034392 |
| 249 | GO:0030195 |
| 250 | GO:0005534 |
| 251 | GO:0046716 |
| 252 | GO:0090201 |

|     |            |
|-----|------------|
| 253 | GO:0070022 |
| 254 | GO:0002523 |
| 255 | GO:0005585 |
| 256 | GO:0035473 |
| 257 | GO:0090321 |
| 258 | GO:0000003 |
| 259 | GO:0035478 |
| 260 | GO:0033961 |
| 261 | GO:0071503 |
| 262 | GO:0017038 |
| 263 | GO:0001567 |
| 264 | GO:0032417 |
| 265 | GO:0002576 |
| 266 | GO:0051873 |
| 267 | GO:0031093 |
| 268 | GO:0001540 |
| 269 | GO:0010716 |
| 270 | GO:0006749 |
| 271 | GO:0030838 |
| 272 | GO:0043654 |
| 273 | GO:0060550 |
| 274 | GO:0060552 |
| 275 | GO:0044146 |
| 276 | GO:2000309 |
| 277 | GO:0071351 |
| 278 | GO:0048549 |
| 279 | GO:0005178 |
| 280 | GO:0033552 |
| 281 | GO:0001974 |
| 282 | GO:0007568 |
| 283 | GO:0043154 |
| 284 | GO:0048386 |
| 285 | GO:0043325 |
| 286 | GO:0051246 |
| 287 | GO:0046677 |
| 288 | GO:0010764 |
| 289 | GO:0030516 |
| 290 | GO:0060740 |
| 291 | GO:0038063 |
| 292 | GO:0004509 |
| 293 | GO:0006029 |
| 294 | GO:0051607 |
| 295 | GO:0035458 |

|     |            |
|-----|------------|
| 296 | GO:0051788 |
| 297 | GO:0005548 |
| 298 | GO:0010804 |
| 299 | GO:0010224 |
| 300 | GO:0042149 |
| 301 | GO:2000379 |
| 302 | GO:0051659 |
| 303 | GO:0060068 |
| 304 | GO:0051602 |
| 305 | GO:0010033 |
| 306 | GO:0048565 |
| 307 | GO:0002666 |
| 308 | GO:0051142 |
| 309 | GO:0032269 |
| 310 | GO:0060729 |
| 311 | GO:0072573 |
| 312 | GO:2000349 |
| 313 | GO:0061043 |
| 314 | GO:0070429 |
| 315 | GO:0034148 |
| 316 | GO:0070433 |
| 317 | GO:0048305 |
| 318 | GO:0034363 |
| 319 | GO:0048666 |
| 320 | GO:0032488 |
| 321 | GO:0010512 |
| 322 | GO:0045599 |
| 323 | GO:0007569 |
| 324 | GO:0015643 |
| 325 | GO:0050927 |
| 326 | GO:0070483 |
| 327 | GO:0048251 |
| 328 | GO:0001917 |
| 329 | GO:0060750 |
| 330 | GO:0008360 |
| 331 | GO:0043559 |
| 332 | GO:0010888 |
| 333 | GO:0038091 |
| 334 | GO:0010763 |
| 335 | GO:0000060 |
| 336 | GO:0030166 |
| 337 | GO:0060087 |
| 338 | GO:0005579 |

|     |            |
|-----|------------|
| 339 | GO:0042461 |
| 340 | GO:0055090 |
| 341 | GO:0005041 |
| 342 | GO:0016176 |
| 343 | GO:0002839 |
| 344 | GO:0045869 |
| 345 | GO:0072255 |
| 346 | GO:2000591 |
| 347 | GO:0072126 |
| 348 | GO:0072264 |
| 349 | GO:0043277 |
| 350 | GO:0072593 |
| 351 | GO:0045179 |
| 352 | GO:0046010 |
| 353 | GO:0043066 |
| 354 | GO:0043405 |
| 355 | GO:0070050 |
| 356 | GO:0033602 |
| 357 | GO:0010902 |
| 358 | GO:0004301 |
| 359 | GO:2000288 |
| 360 | GO:0030145 |
| 361 | hsa05133   |
| 362 | GO:0051346 |
| 363 | GO:0002218 |
| 364 | GO:0001968 |
| 365 | GO:0007263 |
| 366 | GO:0001955 |
| 367 | GO:0060644 |
| 368 | GO:0070371 |
| 369 | GO:0051926 |
| 370 | GO:0034393 |
| 371 | GO:0045348 |
| 372 | GO:0051054 |
| 373 | GO:0030828 |
| 374 | GO:0002758 |
| 375 | GO:0031077 |
| 376 | GO:0001922 |
| 377 | GO:0003104 |
| 378 | GO:0008047 |
| 379 | GO:0031232 |
| 380 | GO:0060557 |
| 381 | GO:0045884 |

|     |            |
|-----|------------|
| 382 | GO:0007606 |
| 383 | GO:0010544 |
| 384 | GO:0071356 |
| 385 | GO:0006809 |
| 386 | GO:0031663 |
| 387 | GO:0032793 |
| 388 | GO:0035684 |
| 389 | GO:0008217 |
| 390 | GO:0051023 |
| 391 | hsa05323   |
| 392 | GO:2000502 |
| 393 | GO:0046668 |
| 394 | GO:0002021 |
| 395 | GO:0001781 |
| 396 | GO:0060741 |
| 397 | GO:0045356 |
| 398 | GO:0007250 |
| 399 | GO:0036020 |
| 400 | GO:0004517 |
| 401 | GO:0032368 |
| 402 | GO:0004653 |
| 403 | GO:0034369 |
| 404 | GO:0006741 |
| 405 | GO:0070506 |
| 406 | GO:0010900 |
| 407 | GO:0002891 |
| 408 | GO:0004903 |
| 409 | GO:0070633 |
| 410 | GO:0009100 |
| 411 | GO:0070195 |
| 412 | GO:0030139 |
| 413 | GO:0042092 |
| 414 | GO:0030308 |
| 415 | GO:0010759 |
| 416 | GO:0042056 |
| 417 | GO:0071456 |
| 418 | GO:0016056 |
| 419 | GO:0046688 |
| 420 | GO:0051280 |
| 421 | GO:0003009 |
| 422 | GO:0002446 |
| 423 | GO:0045188 |
| 424 | GO:0046548 |

|     |            |
|-----|------------|
| 425 | GO:0006935 |
| 426 | GO:0015485 |
| 427 | GO:0060220 |
| 428 | GO:0030704 |
| 429 | GO:0048074 |
| 430 | GO:0006537 |
| 431 | GO:0001848 |
| 432 | GO:0055087 |
| 433 | GO:0021885 |
| 434 | GO:0005044 |
| 435 | GO:0034358 |
| 436 | GO:0019730 |
| 437 | GO:0019865 |
| 438 | GO:0032996 |
| 439 | GO:0010519 |
| 440 | GO:0034382 |
| 441 | GO:0033093 |
| 442 | hsa00512   |
| 443 | GO:0032930 |
| 444 | GO:0044429 |
| 445 | GO:0030214 |
| 446 | GO:0033145 |
| 447 | GO:0055094 |
| 448 | GO:0022009 |
| 449 | GO:0032878 |
| 450 | GO:0060510 |
| 451 | GO:0043184 |
| 452 | GO:0031953 |
| 453 | GO:0050790 |
| 454 | GO:0014834 |
| 455 | GO:0014806 |
| 456 | GO:0032332 |
| 457 | GO:0001875 |
| 458 | GO:0070542 |
| 459 | GO:0002020 |
| 460 | GO:0006917 |
| 461 | GO:0031667 |
| 462 | GO:0042511 |
| 463 | GO:0045765 |
| 464 | GO:0031362 |
| 465 | GO:0071347 |
| 466 | GO:0042622 |
| 467 | GO:0043206 |

|     |            |
|-----|------------|
| 468 | GO:0046696 |
| 469 | GO:0033160 |
| 470 | GO:0045630 |
| 471 | GO:0030336 |
| 472 | GO:2001141 |
| 473 | GO:0042311 |
| 474 | GO:0005462 |
| 475 | GO:0000254 |
| 476 | GO:0015788 |
| 477 | GO:0048242 |
| 478 | GO:0002820 |
| 479 | GO:0032784 |
| 480 | GO:0051005 |
| 481 | GO:0030169 |
| 482 | GO:0034186 |
| 483 | GO:2000048 |
| 484 | GO:0004489 |
| 485 | GO:0071253 |
| 486 | GO:0061338 |
| 487 | GO:0006562 |
| 488 | GO:0001923 |
| 489 | GO:0038062 |
| 490 | GO:0010189 |
| 491 | GO:0033005 |
| 492 | GO:0002064 |
| 493 | GO:0085029 |
| 494 | GO:0043388 |
| 495 | GO:0043570 |
| 496 | GO:0010744 |
| 497 | GO:0031134 |
| 498 | GO:0008201 |
| 499 | GO:0060445 |
| 500 | GO:0002548 |

b) mRMR features list

| Rank | Feature name |
|------|--------------|
| 1    | GO:0030449   |
| 2    | GO:0032463   |
| 3    | GO:0060754   |
| 4    | GO:0006956   |
| 5    | GO:0034189   |
| 6    | GO:0071482   |
| 7    | GO:0002429   |



|    |            |
|----|------------|
| 8  | hsa04610   |
| 9  | GO:0035645 |
| 10 | GO:0000003 |
| 11 | GO:0008228 |
| 12 | GO:0034437 |
| 13 | GO:0006958 |
| 14 | GO:0030023 |
| 15 | GO:0042583 |
| 16 | GO:0060744 |
| 17 | GO:0006957 |
| 18 | GO:0038025 |
| 19 | GO:0008395 |
| 20 | GO:0055106 |
| 21 | hsa05150   |
| 22 | GO:0048018 |
| 23 | GO:0034436 |
| 24 | GO:0033961 |
| 25 | GO:0060011 |
| 26 | GO:0038063 |
| 27 | GO:0016495 |
| 28 | GO:0046629 |
| 29 | GO:0033364 |
| 30 | GO:0060342 |
| 31 | GO:0048739 |
| 32 | GO:0004943 |
| 33 | GO:0060228 |
| 34 | GO:0061302 |
| 35 | GO:0005462 |
| 36 | GO:0001970 |
| 37 | GO:0035624 |
| 38 | GO:0071953 |
| 39 | GO:0050777 |
| 40 | GO:0035473 |
| 41 | GO:0038026 |
| 42 | GO:0001867 |
| 43 | GO:0002575 |
| 44 | GO:0015788 |
| 45 | GO:0004962 |
| 46 | GO:0018242 |
| 47 | GO:0051400 |
| 48 | GO:0004509 |
| 49 | GO:0007603 |
| 50 | GO:0034447 |

|    |            |
|----|------------|
| 51 | GO:0090321 |
| 52 | GO:0035082 |
| 53 | GO:0004866 |
| 54 | GO:0060346 |
| 55 | GO:0034185 |
| 56 | GO:0004876 |
| 57 | GO:0045359 |
| 58 | GO:0042462 |
| 59 | hsa00512   |
| 60 | GO:0002820 |
| 61 | GO:0051873 |
| 62 | GO:0007497 |
| 63 | GO:0031616 |
| 64 | GO:0035478 |
| 65 | GO:0005585 |
| 66 | GO:0043537 |
| 67 | GO:0001850 |
| 68 | GO:0018243 |
| 69 | GO:2001028 |
| 70 | GO:0072332 |
| 71 | GO:0031362 |
| 72 | GO:0048773 |
| 73 | GO:0071503 |
| 74 | GO:0051272 |
| 75 | GO:0009881 |
| 76 | GO:0002462 |
| 77 | GO:0032510 |
| 78 | GO:0001567 |
| 79 | GO:0048598 |
| 80 | GO:0034450 |
| 81 | GO:0019064 |
| 82 | GO:0004944 |
| 83 | GO:0004252 |
| 84 | GO:0046907 |
| 85 | GO:0014043 |
| 86 | GO:0043405 |
| 87 | GO:0008209 |
| 88 | GO:0003823 |
| 89 | GO:0031954 |
| 90 | GO:0017038 |
| 91 | GO:0031109 |
| 92 | GO:0006029 |
| 93 | GO:0042461 |

|     |            |
|-----|------------|
| 94  | GO:0008236 |
| 95  | GO:0004653 |
| 96  | GO:0010711 |
| 97  | GO:0033299 |
| 98  | GO:0030229 |
| 99  | GO:0055087 |
| 100 | GO:0090031 |
| 101 | GO:0007181 |
| 102 | GO:0047696 |
| 103 | GO:0001315 |
| 104 | GO:0001798 |
| 105 | GO:0009583 |
| 106 | GO:0043654 |
| 107 | GO:0038062 |
| 108 | GO:0050766 |
| 109 | GO:0006741 |
| 110 | GO:0051881 |
| 111 | GO:0052724 |
| 112 | GO:0043117 |
| 113 | GO:0060052 |
| 114 | GO:0015074 |
| 115 | GO:0034405 |
| 116 | GO:0045103 |
| 117 | GO:0010815 |
| 118 | GO:1900006 |
| 119 | GO:0052723 |
| 120 | GO:0033700 |
| 121 | GO:0051224 |
| 122 | GO:0060311 |
| 123 | GO:0032364 |
| 124 | GO:0072384 |
| 125 | GO:0030247 |
| 126 | GO:0000254 |
| 127 | GO:0051898 |
| 128 | GO:0005688 |
| 129 | GO:0043331 |
| 130 | GO:0071813 |
| 131 | GO:0046548 |
| 132 | GO:0000832 |
| 133 | GO:0003273 |
| 134 | GO:0032793 |
| 135 | GO:0006705 |
| 136 | GO:0032805 |

|     |            |
|-----|------------|
| 137 | GO:0010501 |
| 138 | GO:0006537 |
| 139 | GO:0034103 |
| 140 | GO:0005586 |
| 141 | GO:0072573 |
| 142 | GO:1900086 |
| 143 | GO:0019836 |
| 144 | GO:0030621 |
| 145 | GO:0034021 |
| 146 | GO:0043196 |
| 147 | GO:0004903 |
| 148 | GO:0014826 |
| 149 | GO:0032467 |
| 150 | GO:0047915 |
| 151 | GO:0048549 |
| 152 | GO:0042088 |
| 153 | GO:0019799 |
| 154 | GO:0035257 |
| 155 | GO:0010991 |
| 156 | GO:0002262 |
| 157 | GO:0006657 |
| 158 | GO:0010804 |
| 159 | GO:0060313 |
| 160 | GO:0002666 |
| 161 | GO:0010923 |
| 162 | GO:0032809 |
| 163 | GO:0060706 |
| 164 | GO:2000349 |
| 165 | GO:0021858 |
| 166 | GO:0032417 |
| 167 | GO:0051651 |
| 168 | GO:0042612 |
| 169 | GO:0005172 |
| 170 | GO:0007063 |
| 171 | GO:0003069 |
| 172 | GO:0005930 |
| 173 | GO:0008440 |
| 174 | GO:0010703 |
| 175 | GO:0031714 |
| 176 | GO:0005540 |
| 177 | GO:0061043 |
| 178 | GO:0047497 |
| 179 | GO:0060220 |

|     |            |
|-----|------------|
| 180 | GO:0051389 |
| 181 | GO:0001917 |
| 182 | GO:0030145 |
| 183 | GO:0016603 |
| 184 | GO:0010760 |
| 185 | GO:0043536 |
| 186 | GO:0070429 |
| 187 | GO:0043570 |
| 188 | GO:0034346 |
| 189 | GO:0006168 |
| 190 | GO:0045494 |
| 191 | GO:0003948 |
| 192 | GO:0046911 |
| 193 | GO:0010747 |
| 194 | GO:0070195 |
| 195 | GO:0033145 |
| 196 | GO:0034148 |
| 197 | GO:0004864 |
| 198 | GO:0006290 |
| 199 | GO:0017186 |
| 200 | GO:0051788 |
| 201 | GO:0004175 |
| 202 | GO:0021517 |
| 203 | GO:0060068 |
| 204 | GO:0070722 |
| 205 | GO:0048666 |
| 206 | GO:0035845 |
| 207 | GO:0070433 |
| 208 | GO:0051106 |
| 209 | GO:0031575 |
| 210 | GO:0004517 |
| 211 | GO:0051635 |
| 212 | GO:0006562 |
| 213 | GO:0042159 |
| 214 | GO:0072686 |
| 215 | GO:0016422 |
| 216 | GO:0045179 |
| 217 | GO:0033627 |
| 218 | GO:0008271 |
| 219 | GO:0016254 |
| 220 | GO:0030235 |
| 221 | GO:0048242 |
| 222 | GO:0008574 |

|     |            |
|-----|------------|
| 223 | GO:0090037 |
| 224 | GO:0006122 |
| 225 | GO:0030704 |
| 226 | GO:0060745 |
| 227 | GO:0035924 |
| 228 | GO:2001141 |
| 229 | GO:0015920 |
| 230 | GO:0051580 |
| 231 | GO:0010738 |
| 232 | GO:0009258 |
| 233 | GO:0004012 |
| 234 | GO:0018963 |
| 235 | GO:0015432 |
| 236 | GO:0003743 |
| 237 | GO:0051856 |
| 238 | GO:0051894 |
| 239 | GO:0005579 |
| 240 | GO:0055090 |
| 241 | GO:0006749 |
| 242 | GO:0015116 |
| 243 | GO:0032855 |
| 244 | GO:0008554 |
| 245 | GO:0051271 |
| 246 | GO:0019730 |
| 247 | GO:0010625 |
| 248 | GO:0048074 |
| 249 | GO:0006707 |
| 250 | GO:0043183 |
| 251 | GO:0031593 |
| 252 | GO:0051280 |
| 253 | GO:0015126 |
| 254 | GO:0009100 |
| 255 | GO:0021762 |
| 256 | GO:0004496 |
| 257 | GO:0051028 |
| 258 | GO:0051000 |
| 259 | GO:0045263 |
| 260 | GO:0021681 |
| 261 | GO:0010466 |
| 262 | GO:0003100 |
| 263 | GO:0043277 |
| 264 | GO:0044464 |
| 265 | GO:0010902 |

|     |            |
|-----|------------|
| 266 | GO:0030903 |
| 267 | GO:0032996 |
| 268 | GO:0072563 |
| 269 | hsa04962   |
| 270 | GO:0000506 |
| 271 | GO:0032432 |
| 272 | GO:0004489 |
| 273 | GO:0008753 |
| 274 | GO:0043498 |
| 275 | GO:0006869 |
| 276 | GO:0030346 |
| 277 | GO:0003999 |
| 278 | GO:0031134 |
| 279 | GO:0010519 |
| 280 | GO:0060319 |
| 281 | GO:0070633 |
| 282 | GO:0021885 |
| 283 | GO:0008253 |
| 284 | GO:0033602 |
| 285 | GO:0000710 |
| 286 | GO:0004301 |
| 287 | GO:0050665 |
| 288 | GO:0050884 |
| 289 | GO:0001569 |
| 290 | GO:0009597 |
| 291 | GO:0034358 |
| 292 | GO:0017176 |
| 293 | GO:0010821 |
| 294 | GO:0060129 |
| 295 | GO:0010875 |
| 296 | GO:0006108 |
| 297 | GO:0005922 |
| 298 | GO:0032757 |
| 299 | GO:0071593 |
| 300 | GO:0005010 |
| 301 | GO:0045869 |
| 302 | GO:0001919 |
| 303 | GO:0070247 |
| 304 | GO:0005537 |
| 305 | GO:0019430 |
| 306 | GO:0071253 |
| 307 | GO:0060272 |
| 308 | GO:0006351 |

|     |            |
|-----|------------|
| 309 | GO:0070541 |
| 310 | GO:0060750 |
| 311 | GO:0042801 |
| 312 | GO:0061153 |
| 313 | GO:0004784 |
| 314 | GO:0010369 |
| 315 | GO:0019166 |
| 316 | GO:0009409 |
| 317 | GO:0001848 |
| 318 | GO:0032302 |
| 319 | GO:0007256 |
| 320 | GO:0002055 |
| 321 | GO:0070287 |
| 322 | GO:0007606 |
| 323 | GO:0042622 |
| 324 | GO:0061338 |
| 325 | GO:0033269 |
| 326 | GO:0018894 |
| 327 | GO:0001937 |
| 328 | GO:0032368 |
| 329 | GO:0007398 |
| 330 | GO:0006576 |
| 331 | GO:0002042 |
| 332 | GO:0005548 |
| 333 | GO:0004631 |
| 334 | GO:0048306 |
| 335 | GO:0042832 |
| 336 | GO:0048878 |
| 337 | GO:0043490 |
| 338 | GO:0046813 |
| 339 | GO:0034369 |
| 340 | hsa03013   |
| 341 | GO:0008397 |
| 342 | GO:0045599 |
| 343 | GO:0006801 |
| 344 | GO:0030497 |
| 345 | GO:0002891 |
| 346 | GO:0033081 |
| 347 | GO:0000406 |
| 348 | GO:0005124 |
| 349 | GO:0055094 |
| 350 | GO:0070050 |
| 351 | GO:0019825 |



|     |            |
|-----|------------|
| 352 | GO:2001027 |
| 353 | GO:1900142 |
| 354 | GO:0010001 |
| 355 | GO:0051782 |
| 356 | GO:0048255 |
| 357 | GO:0033778 |
| 358 | GO:0017158 |
| 359 | GO:0070530 |
| 360 | GO:0009449 |
| 361 | GO:0019835 |
| 362 | GO:0004181 |
| 363 | GO:0015301 |
| 364 | GO:0070052 |
| 365 | GO:2000504 |
| 366 | GO:0034767 |
| 367 | GO:0052033 |
| 368 | GO:0015485 |
| 369 | GO:0006940 |
| 370 | GO:0045174 |
| 371 | GO:1900165 |
| 372 | GO:0005367 |
| 373 | GO:0010900 |
| 374 | GO:0007632 |
| 375 | GO:0060128 |
| 376 | GO:0045309 |
| 377 | GO:0002523 |
| 378 | GO:0016805 |
| 379 | GO:0043381 |
| 380 | GO:0008187 |
| 381 | GO:0050610 |
| 382 | GO:0000956 |
| 383 | GO:0070430 |
| 384 | GO:0010165 |
| 385 | GO:0008272 |
| 386 | GO:0060613 |
| 387 | GO:0005581 |
| 388 | GO:0033192 |
| 389 | GO:0070326 |
| 390 | GO:0051301 |
| 391 | GO:0033005 |
| 392 | GO:0050711 |
| 393 | GO:0010763 |
| 394 | GO:0032181 |

|     |            |
|-----|------------|
| 395 | GO:0032003 |
| 396 | GO:0061077 |
| 397 | GO:0043142 |
| 398 | GO:0050790 |
| 399 | GO:0035092 |
| 400 | GO:0001300 |
| 401 | GO:0012501 |
| 402 | GO:0033093 |
| 403 | GO:0071028 |
| 404 | GO:0035630 |
| 405 | GO:0051148 |
| 406 | GO:0002537 |
| 407 | GO:0070328 |
| 408 | GO:0001923 |
| 409 | GO:0000267 |
| 410 | GO:0031232 |
| 411 | GO:0006491 |
| 412 | GO:0048246 |
| 413 | GO:0002028 |
| 414 | GO:0005577 |
| 415 | GO:0031573 |
| 416 | GO:0005041 |
| 417 | GO:0050655 |
| 418 | GO:2000533 |
| 419 | GO:0097186 |
| 420 | GO:0047547 |
| 421 | GO:0001938 |
| 422 | GO:0016619 |
| 423 | GO:0050262 |
| 424 | GO:0015727 |
| 425 | GO:0044241 |
| 426 | GO:0003009 |
| 427 | GO:0031798 |
| 428 | GO:0031061 |
| 429 | GO:0019439 |
| 430 | GO:0001922 |
| 431 | GO:0008094 |
| 432 | GO:0060266 |
| 433 | GO:0071062 |
| 434 | GO:0015129 |
| 435 | GO:0060229 |
| 436 | GO:0019543 |
| 437 | GO:0035873 |

|     |            |
|-----|------------|
| 438 | GO:0016046 |
| 439 | GO:0007567 |
| 440 | GO:0010934 |
| 441 | GO:0031077 |
| 442 | GO:0003032 |
| 443 | GO:0035417 |
| 444 | GO:0006649 |
| 445 | GO:0032449 |
| 446 | GO:0004473 |
| 447 | GO:0014909 |
| 448 | GO:0051346 |
| 449 | GO:0002282 |
| 450 | GO:0010814 |
| 451 | GO:0047408 |
| 452 | GO:2000402 |
| 453 | GO:0038052 |
| 454 | GO:0050921 |
| 455 | GO:0070506 |
| 456 | GO:0009432 |
| 457 | GO:0047409 |
| 458 | GO:0003085 |
| 459 | GO:0032958 |
| 460 | GO:0031302 |
| 461 | GO:0006311 |
| 462 | GO:0030492 |
| 463 | GO:0048672 |
| 464 | GO:0030421 |
| 465 | GO:0071922 |
| 466 | GO:0032784 |
| 467 | GO:0046485 |
| 468 | GO:0009404 |
| 469 | GO:0051918 |
| 470 | GO:0070434 |
| 471 | GO:0045159 |
| 472 | GO:0030020 |
| 473 | GO:0010816 |
| 474 | GO:0003684 |
| 475 | GO:0038091 |
| 476 | GO:0010189 |
| 477 | GO:0071222 |
| 478 | GO:0061299 |
| 479 | GO:0045076 |
| 480 | GO:0019934 |

|     |            |
|-----|------------|
| 481 | GO:0034959 |
| 482 | GO:0042660 |
| 483 | GO:0030331 |
| 484 | GO:0051101 |
| 485 | GO:0009624 |
| 486 | GO:0008089 |
| 487 | GO:0005687 |
| 488 | GO:2000256 |
| 489 | GO:0055099 |
| 490 | GO:0015355 |
| 491 | GO:0010232 |
| 492 | GO:0002204 |
| 493 | GO:0001540 |
| 494 | GO:0050746 |
| 495 | GO:0005072 |
| 496 | GO:0046010 |
| 497 | GO:0046784 |
| 498 | GO:0021545 |
| 499 | GO:0042345 |
| 500 | GO:0016056 |

(9) Dataset  $D_9$

a) MaxRel features list

| Rank | Feature name |
|------|--------------|
| 1    | GO:0071482   |
| 2    | GO:0038025   |
| 3    | GO:0034436   |
| 4    | GO:0034437   |
| 5    | GO:0010001   |
| 6    | GO:0003069   |
| 7    | GO:0034021   |
| 8    | GO:0001315   |
| 9    | GO:0001970   |
| 10   | GO:0048773   |
| 11   | GO:0016495   |
| 12   | GO:0034447   |
| 13   | GO:0034189   |
| 14   | GO:0004866   |
| 15   | GO:0043537   |
| 16   | GO:2001028   |
| 17   | GO:0002575   |
| 18   | GO:0048739   |
| 19   | GO:0060342   |

|    |            |
|----|------------|
| 20 | hsa05150   |
| 21 | GO:0038026 |
| 22 | GO:0071953 |
| 23 | hsa04610   |
| 24 | GO:0043536 |
| 25 | GO:0072563 |
| 26 | GO:0050665 |
| 27 | GO:0035645 |
| 28 | GO:0038091 |
| 29 | GO:0043183 |
| 30 | GO:0048844 |
| 31 | GO:0045103 |
| 32 | GO:0051400 |
| 33 | GO:0001938 |
| 34 | GO:0004944 |
| 35 | GO:0005172 |
| 36 | GO:0032930 |
| 37 | GO:0048678 |
| 38 | GO:0010863 |
| 39 | GO:0008228 |
| 40 | GO:0051389 |
| 41 | GO:0014043 |
| 42 | GO:0003273 |
| 43 | GO:0030449 |
| 44 | GO:0006956 |
| 45 | GO:0051856 |
| 46 | GO:0034185 |
| 47 | GO:0002042 |
| 48 | GO:0001798 |
| 49 | GO:1900086 |
| 50 | GO:0032467 |
| 51 | GO:0010759 |
| 52 | GO:0060311 |
| 53 | GO:0010711 |
| 54 | GO:0051580 |
| 55 | GO:0044464 |
| 56 | GO:0060313 |
| 57 | GO:0010703 |
| 58 | GO:0010625 |
| 59 | GO:0034103 |
| 60 | GO:0048245 |
| 61 | GO:0048845 |
| 62 | GO:0051651 |

|     |            |
|-----|------------|
| 63  | GO:0046911 |
| 64  | GO:0032805 |
| 65  | GO:0021762 |
| 66  | GO:0060319 |
| 67  | GO:0048593 |
| 68  | GO:0045429 |
| 69  | GO:0003032 |
| 70  | GO:0001300 |
| 71  | GO:0060754 |
| 72  | GO:0043331 |
| 73  | GO:0030229 |
| 74  | GO:0004962 |
| 75  | GO:0002282 |
| 76  | GO:0000302 |
| 77  | GO:0046813 |
| 78  | GO:0015920 |
| 79  | GO:0051881 |
| 80  | GO:0090031 |
| 81  | GO:0030949 |
| 82  | GO:0004784 |
| 83  | GO:1900006 |
| 84  | GO:0006940 |
| 85  | GO:0042159 |
| 86  | GO:0032855 |
| 87  | GO:0007603 |
| 88  | GO:0000303 |
| 89  | GO:0048246 |
| 90  | GO:0005581 |
| 91  | GO:0009881 |
| 92  | GO:0034346 |
| 93  | GO:0031109 |
| 94  | GO:0009597 |
| 95  | GO:0016056 |
| 96  | GO:0060527 |
| 97  | GO:0051898 |
| 98  | GO:0035630 |
| 99  | GO:0060011 |
| 100 | GO:0010477 |
| 101 | GO:0001910 |
| 102 | GO:0002693 |
| 103 | GO:0035924 |
| 104 | GO:0002457 |
| 105 | GO:0010466 |

|     |            |
|-----|------------|
| 106 | GO:0043498 |
| 107 | GO:0032757 |
| 108 | GO:0033691 |
| 109 | GO:0001917 |
| 110 | GO:0043206 |
| 111 | GO:0071361 |
| 112 | GO:0032463 |
| 113 | GO:0002551 |
| 114 | GO:0052033 |
| 115 | GO:0042583 |
| 116 | GO:0042622 |
| 117 | GO:0042554 |
| 118 | GO:0006957 |
| 119 | GO:0019064 |
| 120 | GO:0032958 |
| 121 | GO:0043171 |
| 122 | GO:0060020 |
| 123 | GO:0032364 |
| 124 | GO:0032387 |
| 125 | GO:0001968 |
| 126 | GO:0001957 |
| 127 | GO:0042056 |
| 128 | GO:2000379 |
| 129 | GO:0050918 |
| 130 | GO:0008360 |
| 131 | GO:0032809 |
| 132 | GO:0001991 |
| 133 | GO:0071346 |
| 134 | GO:0033552 |
| 135 | GO:0055090 |
| 136 | GO:0035082 |
| 137 | GO:0042461 |
| 138 | GO:0005010 |
| 139 | GO:0042660 |
| 140 | GO:0043117 |
| 141 | GO:0048018 |
| 142 | GO:0002523 |
| 143 | GO:0031012 |
| 144 | GO:0051272 |
| 145 | GO:0014904 |
| 146 | GO:0009441 |
| 147 | GO:0014896 |
| 148 | GO:0051000 |

|     |            |
|-----|------------|
| 149 | GO:0060509 |
| 150 | GO:0017158 |
| 151 | GO:0060510 |
| 152 | GO:0005072 |
| 153 | GO:0005534 |
| 154 | GO:0071222 |
| 155 | GO:0045766 |
| 156 | GO:0060346 |
| 157 | GO:0030214 |
| 158 | GO:0070434 |
| 159 | GO:0032732 |
| 160 | GO:0002092 |
| 161 | GO:0070430 |
| 162 | GO:0016046 |
| 163 | GO:0002537 |
| 164 | GO:0070301 |
| 165 | GO:0032432 |
| 166 | GO:0005615 |
| 167 | GO:0070670 |
| 168 | GO:0021940 |
| 169 | GO:0060052 |
| 170 | GO:0010875 |
| 171 | GO:0010595 |
| 172 | GO:0009611 |
| 173 | GO:0031701 |
| 174 | GO:0004943 |
| 175 | GO:0060228 |
| 176 | GO:0002462 |
| 177 | GO:0004876 |
| 178 | GO:0001850 |
| 179 | GO:0002291 |
| 180 | GO:0006700 |
| 181 | GO:0007497 |
| 182 | GO:0010764 |
| 183 | GO:0090190 |
| 184 | GO:0019430 |
| 185 | GO:0070371 |
| 186 | GO:0060128 |
| 187 | GO:0008090 |
| 188 | GO:0060129 |
| 189 | GO:0043200 |
| 190 | GO:0033364 |
| 191 | GO:0034363 |



|     |            |
|-----|------------|
| 192 | GO:0060265 |
| 193 | GO:0002232 |
| 194 | GO:0060229 |
| 195 | GO:0032490 |
| 196 | GO:0045541 |
| 197 | GO:0031077 |
| 198 | GO:0043388 |
| 199 | GO:0009409 |
| 200 | GO:0031953 |
| 201 | GO:0006958 |
| 202 | GO:0010902 |
| 203 | GO:0070050 |
| 204 | GO:0043154 |
| 205 | GO:0007256 |
| 206 | GO:0042088 |
| 207 | GO:0006801 |
| 208 | GO:0060763 |
| 209 | GO:0001937 |
| 210 | GO:0030195 |
| 211 | GO:0060394 |
| 212 | GO:0050921 |
| 213 | GO:0005586 |
| 214 | GO:0001666 |
| 215 | GO:0010763 |
| 216 | GO:0002262 |
| 217 | GO:0035767 |
| 218 | GO:0060591 |
| 219 | GO:0046620 |
| 220 | GO:0048598 |
| 221 | GO:0033160 |
| 222 | GO:0002021 |
| 223 | GO:0005506 |
| 224 | GO:0060123 |
| 225 | GO:0035684 |
| 226 | GO:2000427 |
| 227 | GO:0008395 |
| 228 | GO:0002548 |
| 229 | GO:2000502 |
| 230 | GO:0006290 |
| 231 | GO:0048661 |
| 232 | GO:0001974 |
| 233 | GO:0002218 |
| 234 | GO:0031102 |

|     |            |
|-----|------------|
| 235 | GO:0070483 |
| 236 | GO:0070326 |
| 237 | GO:0055093 |
| 238 | GO:0001569 |
| 239 | GO:0060042 |
| 240 | GO:0001998 |
| 241 | GO:0035411 |
| 242 | GO:0031703 |
| 243 | GO:0003331 |
| 244 | GO:0001999 |
| 245 | GO:0061049 |
| 246 | GO:0014873 |
| 247 | GO:0034104 |
| 248 | GO:0048251 |
| 249 | GO:0030516 |
| 250 | GO:0060351 |
| 251 | GO:0070886 |
| 252 | GO:0032270 |
| 253 | GO:0060744 |
| 254 | GO:0033081 |
| 255 | GO:0021517 |
| 256 | GO:0070373 |
| 257 | GO:0009583 |
| 258 | GO:0010804 |
| 259 | GO:0019836 |
| 260 | GO:0070541 |
| 261 | GO:0043654 |
| 262 | GO:0033700 |
| 263 | GO:0042310 |
| 264 | GO:0009586 |
| 265 | GO:0006917 |
| 266 | GO:0051607 |
| 267 | GO:0071356 |
| 268 | GO:0071456 |
| 269 | GO:0007568 |
| 270 | GO:0048009 |
| 271 | GO:0009408 |
| 272 | GO:0042832 |
| 273 | GO:0002384 |
| 274 | GO:0002446 |
| 275 | GO:0031017 |
| 276 | GO:0070052 |
| 277 | GO:0035624 |

|     |            |
|-----|------------|
| 278 | GO:0010899 |
| 279 | GO:0007250 |
| 280 | GO:0010873 |
| 281 | GO:0048144 |
| 282 | GO:0071360 |
| 283 | GO:0042095 |
| 284 | GO:0050777 |
| 285 | GO:0060729 |
| 286 | GO:0051659 |
| 287 | GO:0030336 |
| 288 | GO:0048306 |
| 289 | GO:0048146 |
| 290 | GO:0071347 |
| 291 | GO:0045765 |
| 292 | GO:0032148 |
| 293 | GO:0060325 |
| 294 | GO:0051918 |
| 295 | GO:0033627 |
| 296 | GO:0002758 |
| 297 | hsa05323   |
| 298 | GO:0015643 |
| 299 | GO:0070091 |
| 300 | GO:0060745 |
| 301 | GO:0060697 |
| 302 | GO:0035845 |
| 303 | GO:2000270 |
| 304 | GO:0034358 |
| 305 | GO:0002429 |
| 306 | GO:0046629 |
| 307 | GO:2000288 |
| 308 | GO:0090037 |
| 309 | GO:0043559 |
| 310 | GO:2000121 |
| 311 | GO:0061045 |
| 312 | GO:0060426 |
| 313 | GO:0046716 |
| 314 | GO:0005548 |
| 315 | GO:0061302 |
| 316 | GO:0045359 |
| 317 | GO:0008210 |
| 318 | GO:0035458 |
| 319 | GO:0001502 |
| 320 | GO:0072593 |

|     |            |
|-----|------------|
| 321 | GO:0000003 |
| 322 | GO:0021858 |
| 323 | GO:0034384 |
| 324 | GO:0048635 |
| 325 | GO:0031093 |
| 326 | GO:0048010 |
| 327 | GO:0032417 |
| 328 | GO:0048286 |
| 329 | GO:0008217 |
| 330 | GO:0071230 |
| 331 | GO:0034505 |
| 332 | GO:0051591 |
| 333 | GO:0016004 |
| 334 | GO:0004252 |
| 335 | GO:0005041 |
| 336 | GO:0004012 |
| 337 | GO:0002035 |
| 338 | GO:0045188 |
| 339 | GO:0021952 |
| 340 | GO:0006935 |
| 341 | GO:0060230 |
| 342 | GO:0050930 |
| 343 | GO:0071813 |
| 344 | GO:0045906 |
| 345 | GO:0032497 |
| 346 | GO:0042325 |
| 347 | GO:0051894 |
| 348 | GO:0030346 |
| 349 | GO:0043184 |
| 350 | GO:0016942 |
| 351 | GO:0001895 |
| 352 | GO:0070506 |
| 353 | GO:0035987 |
| 354 | GO:0032368 |
| 355 | GO:0004509 |
| 356 | GO:0010900 |
| 357 | GO:0031052 |
| 358 | GO:0031507 |
| 359 | GO:0003131 |
| 360 | GO:0035978 |
| 361 | GO:0034369 |
| 362 | GO:0035500 |
| 363 | GO:2000685 |

|     |            |
|-----|------------|
| 364 | GO:0035501 |
| 365 | GO:2001033 |
| 366 | GO:0060613 |
| 367 | GO:0000189 |
| 368 | GO:0005883 |
| 369 | GO:0090265 |
| 370 | GO:0008584 |
| 371 | GO:0046579 |
| 372 | GO:0010544 |
| 373 | GO:0043066 |
| 374 | GO:0007263 |
| 375 | GO:0048407 |
| 376 | GO:0031727 |
| 377 | hsa05133   |
| 378 | GO:0005178 |
| 379 | GO:0007565 |
| 380 | GO:0007584 |
| 381 | GO:0010574 |
| 382 | GO:0051384 |
| 383 | GO:0042060 |
| 384 | GO:0051602 |
| 385 | GO:0008209 |
| 386 | GO:0038052 |
| 387 | GO:0031798 |
| 388 | GO:0060436 |
| 389 | GO:0002033 |
| 390 | GO:0060879 |
| 391 | GO:0060496 |
| 392 | GO:0046877 |
| 393 | GO:0071253 |
| 394 | GO:0070352 |
| 395 | GO:0061115 |
| 396 | GO:0060661 |
| 397 | GO:0008107 |
| 398 | GO:0001730 |
| 399 | GO:0070384 |
| 400 | GO:0070075 |
| 401 | GO:0050674 |
| 402 | GO:0050677 |
| 403 | GO:0048535 |
| 404 | GO:0051873 |
| 405 | GO:0070051 |
| 406 | GO:2000098 |

|     |            |
|-----|------------|
| 407 | GO:0003104 |
| 408 | GO:0006707 |
| 409 | GO:0042231 |
| 410 | GO:0010757 |
| 411 | GO:2000256 |
| 412 | GO:0060707 |
| 413 | GO:0014012 |
| 414 | GO:0010740 |
| 415 | GO:0050650 |
| 416 | GO:0032700 |
| 417 | GO:0042253 |
| 418 | GO:0042033 |
| 419 | GO:0008089 |
| 420 | GO:0014834 |
| 421 | GO:0032878 |
| 422 | GO:0090201 |
| 423 | GO:0034056 |
| 424 | GO:0061304 |
| 425 | GO:0001867 |
| 426 | GO:0008009 |
| 427 | GO:0044241 |
| 428 | GO:0005930 |
| 429 | GO:0042627 |
| 430 | GO:0016209 |
| 431 | GO:0014826 |
| 432 | GO:0048247 |
| 433 | GO:0061044 |
| 434 | GO:0030198 |
| 435 | GO:0035491 |
| 436 | GO:0071258 |
| 437 | GO:0070887 |
| 438 | GO:0016176 |
| 439 | GO:2000591 |
| 440 | GO:0045869 |
| 441 | GO:0033299 |
| 442 | GO:0022617 |
| 443 | GO:0005201 |
| 444 | GO:0072255 |
| 445 | GO:0040007 |
| 446 | GO:0072126 |
| 447 | GO:0072264 |
| 448 | GO:2000048 |
| 449 | GO:0030023 |

|     |            |
|-----|------------|
| 450 | GO:0007606 |
| 451 | GO:0007435 |
| 452 | GO:0043410 |
| 453 | GO:0030155 |
| 454 | GO:0003823 |
| 455 | GO:0031091 |
| 456 | GO:0034145 |
| 457 | GO:0034382 |
| 458 | GO:0001675 |
| 459 | GO:0010951 |
| 460 | GO:0048659 |
| 461 | GO:0051387 |
| 462 | GO:0097193 |
| 463 | GO:0004301 |
| 464 | GO:0008061 |
| 465 | GO:0030235 |
| 466 | GO:0044429 |
| 467 | GO:0042307 |
| 468 | hsa05143   |
| 469 | GO:0010812 |
| 470 | GO:0042092 |
| 471 | GO:0048565 |
| 472 | GO:0070542 |
| 473 | GO:0042311 |
| 474 | GO:0019900 |
| 475 | GO:0032287 |
| 476 | GO:0070022 |
| 477 | GO:0060740 |
| 478 | GO:0046677 |
| 479 | GO:0033591 |
| 480 | GO:0003009 |
| 481 | GO:0060137 |
| 482 | GO:0001955 |
| 483 | GO:0050927 |
| 484 | GO:0005577 |
| 485 | GO:0070508 |
| 486 | GO:0032488 |
| 487 | GO:0071223 |
| 488 | GO:0043570 |
| 489 | GO:0010512 |
| 490 | GO:0072332 |
| 491 | GO:0034392 |
| 492 | GO:0010716 |

|     |            |
|-----|------------|
| 493 | GO:0031232 |
| 494 | GO:0001540 |
| 495 | GO:0060174 |
| 496 | GO:0071506 |
| 497 | GO:0051450 |
| 498 | GO:0090263 |
| 499 | GO:0006029 |
| 500 | GO:0005576 |

b) mRMR features list

| Rank | Feature name |
|------|--------------|
| 1    | GO:0071482   |
| 2    | GO:0048739   |
| 3    | GO:0055090   |
| 4    | GO:0004866   |
| 5    | GO:0038025   |
| 6    | GO:0005581   |
| 7    | GO:0010001   |
| 8    | GO:0048018   |
| 9    | GO:0003069   |
| 10   | GO:0006956   |
| 11   | GO:0070052   |
| 12   | GO:0008228   |
| 13   | GO:0038026   |
| 14   | GO:0048593   |
| 15   | hsa05150     |
| 16   | GO:0000003   |
| 17   | GO:0060229   |
| 18   | GO:0001970   |
| 19   | GO:0072563   |
| 20   | GO:0031701   |
| 21   | hsa04610     |
| 22   | GO:0019064   |
| 23   | GO:0034021   |
| 24   | GO:0035082   |
| 25   | GO:0038091   |
| 26   | GO:0002429   |
| 27   | GO:0030449   |
| 28   | GO:0034436   |
| 29   | GO:0005506   |
| 30   | GO:0060342   |
| 31   | GO:0031012   |
| 32   | GO:0004944   |



|    |            |
|----|------------|
| 33 | GO:0043537 |
| 34 | GO:0042461 |
| 35 | GO:0032930 |
| 36 | GO:0060265 |
| 37 | GO:0007603 |
| 38 | GO:0033691 |
| 39 | GO:0051272 |
| 40 | GO:0015920 |
| 41 | GO:0008395 |
| 42 | GO:0001315 |
| 43 | GO:0002575 |
| 44 | GO:0021858 |
| 45 | GO:0001991 |
| 46 | GO:0016495 |
| 47 | GO:0072686 |
| 48 | GO:0046629 |
| 49 | GO:0060042 |
| 50 | GO:0034437 |
| 51 | GO:0006940 |
| 52 | GO:0060744 |
| 53 | GO:0002232 |
| 54 | GO:0060123 |
| 55 | GO:0010759 |
| 56 | GO:0001957 |
| 57 | GO:0034384 |
| 58 | GO:0048773 |
| 59 | GO:0006626 |
| 60 | GO:2001028 |
| 61 | GO:0006957 |
| 62 | GO:0032490 |
| 63 | GO:0048844 |
| 64 | GO:0009881 |
| 65 | GO:0071953 |
| 66 | GO:0005597 |
| 67 | GO:0042583 |
| 68 | GO:0004509 |
| 69 | GO:0034189 |
| 70 | GO:0038063 |
| 71 | GO:0043654 |
| 72 | GO:0001998 |
| 73 | GO:0001917 |
| 74 | GO:1900086 |
| 75 | GO:0060436 |

|     |            |
|-----|------------|
| 76  | GO:0060011 |
| 77  | GO:0001867 |
| 78  | GO:0034447 |
| 79  | GO:0060346 |
| 80  | GO:0005883 |
| 81  | GO:0001798 |
| 82  | GO:0008107 |
| 83  | GO:0002042 |
| 84  | GO:0035411 |
| 85  | GO:0035624 |
| 86  | GO:0035645 |
| 87  | GO:0001578 |
| 88  | GO:0006700 |
| 89  | GO:0035845 |
| 90  | GO:0003032 |
| 91  | GO:0006958 |
| 92  | GO:0030214 |
| 93  | GO:0031703 |
| 94  | GO:0060879 |
| 95  | GO:0043536 |
| 96  | GO:0034185 |
| 97  | GO:0001574 |
| 98  | GO:0032364 |
| 99  | GO:0048306 |
| 100 | GO:0043171 |
| 101 | GO:0003331 |
| 102 | GO:0055106 |
| 103 | GO:0050665 |
| 104 | GO:0018184 |
| 105 | GO:0002092 |
| 106 | GO:2000270 |
| 107 | GO:0031362 |
| 108 | GO:0035924 |
| 109 | GO:0004943 |
| 110 | GO:0045103 |
| 111 | GO:0001999 |
| 112 | GO:0060496 |
| 113 | GO:0046813 |
| 114 | GO:0010501 |
| 115 | GO:0048845 |
| 116 | GO:0010804 |
| 117 | GO:0061049 |
| 118 | GO:0060754 |

|     |            |
|-----|------------|
| 119 | GO:0001675 |
| 120 | GO:0002462 |
| 121 | GO:0060527 |
| 122 | GO:0060806 |
| 123 | GO:0010763 |
| 124 | GO:0060228 |
| 125 | GO:0060345 |
| 126 | GO:0014873 |
| 127 | GO:0016056 |
| 128 | GO:0005930 |
| 129 | GO:0032463 |
| 130 | GO:0046877 |
| 131 | GO:0004301 |
| 132 | GO:0030621 |
| 133 | GO:0043331 |
| 134 | GO:0001502 |
| 135 | GO:0031073 |
| 136 | GO:0002523 |
| 137 | GO:0060394 |
| 138 | GO:0004876 |
| 139 | GO:0035767 |
| 140 | GO:0034104 |
| 141 | GO:0004962 |
| 142 | GO:0007080 |
| 143 | GO:0008210 |
| 144 | GO:0070352 |
| 145 | GO:0051400 |
| 146 | GO:0010902 |
| 147 | GO:0005586 |
| 148 | GO:0006705 |
| 149 | GO:0090031 |
| 150 | GO:0045046 |
| 151 | GO:0070050 |
| 152 | GO:0003823 |
| 153 | GO:0061302 |
| 154 | GO:0016715 |
| 155 | GO:0005172 |
| 156 | GO:0032994 |
| 157 | GO:0014043 |
| 158 | GO:0019799 |
| 159 | GO:0001850 |
| 160 | GO:0001730 |
| 161 | GO:0042554 |

|     |            |
|-----|------------|
| 162 | GO:0008200 |
| 163 | GO:0051881 |
| 164 | GO:0047749 |
| 165 | GO:0061115 |
| 166 | GO:0005577 |
| 167 | GO:0043117 |
| 168 | GO:0060052 |
| 169 | GO:0010863 |
| 170 | GO:0031491 |
| 171 | GO:0034445 |
| 172 | GO:0032417 |
| 173 | GO:1900006 |
| 174 | GO:0048535 |
| 175 | GO:0043152 |
| 176 | GO:0060661 |
| 177 | GO:0043183 |
| 178 | GO:0042612 |
| 179 | GO:0019836 |
| 180 | GO:0016557 |
| 181 | GO:0048678 |
| 182 | GO:0043206 |
| 183 | GO:0016817 |
| 184 | hsa04146   |
| 185 | GO:0003273 |
| 186 | GO:0031616 |
| 187 | GO:0070384 |
| 188 | GO:0010466 |
| 189 | GO:0035375 |
| 190 | GO:0004252 |
| 191 | GO:0001750 |
| 192 | GO:0043570 |
| 193 | GO:0051873 |
| 194 | GO:0042310 |
| 195 | GO:0060319 |
| 196 | GO:0035987 |
| 197 | GO:0030229 |
| 198 | GO:0006168 |
| 199 | GO:0070075 |
| 200 | GO:0005105 |
| 201 | GO:0048246 |
| 202 | GO:0044241 |
| 203 | GO:0090190 |
| 204 | GO:0006290 |

|     |            |
|-----|------------|
| 205 | GO:0021678 |
| 206 | GO:0005010 |
| 207 | GO:0030023 |
| 208 | GO:0002033 |
| 209 | GO:0000302 |
| 210 | GO:0070206 |
| 211 | GO:0042622 |
| 212 | GO:0050674 |
| 213 | GO:0050689 |
| 214 | GO:0090101 |
| 215 | GO:0010388 |
| 216 | GO:0043196 |
| 217 | GO:0001938 |
| 218 | GO:0070584 |
| 219 | GO:0031052 |
| 220 | GO:0051389 |
| 221 | GO:0043159 |
| 222 | GO:0006029 |
| 223 | GO:0033700 |
| 224 | GO:0051635 |
| 225 | GO:0050677 |
| 226 | GO:0071253 |
| 227 | GO:0031091 |
| 228 | GO:0021952 |
| 229 | GO:0051856 |
| 230 | GO:0051345 |
| 231 | GO:0001968 |
| 232 | GO:0002262 |
| 233 | GO:0005055 |
| 234 | GO:0031507 |
| 235 | GO:0005537 |
| 236 | GO:0051580 |
| 237 | GO:0034875 |
| 238 | GO:0060351 |
| 239 | GO:0009597 |
| 240 | GO:0010430 |
| 241 | GO:0004016 |
| 242 | GO:0033364 |
| 243 | GO:0032855 |
| 244 | GO:0003131 |
| 245 | GO:0008187 |
| 246 | GO:0005201 |
| 247 | GO:0034363 |

|     |            |
|-----|------------|
| 248 | GO:0005592 |
| 249 | GO:0007606 |
| 250 | GO:0044464 |
| 251 | GO:0045618 |
| 252 | GO:0005540 |
| 253 | GO:2000379 |
| 254 | GO:0014826 |
| 255 | GO:0010873 |
| 256 | GO:0048245 |
| 257 | GO:0034088 |
| 258 | GO:0071622 |
| 259 | GO:0035978 |
| 260 | GO:0071360 |
| 261 | GO:0010747 |
| 262 | GO:0097186 |
| 263 | GO:0010625 |
| 264 | GO:0016209 |
| 265 | GO:0043088 |
| 266 | GO:0031714 |
| 267 | GO:0070506 |
| 268 | GO:0032467 |
| 269 | GO:0051148 |
| 270 | GO:0070722 |
| 271 | GO:0071779 |
| 272 | GO:0035500 |
| 273 | GO:0005813 |
| 274 | GO:2000533 |
| 275 | GO:0002134 |
| 276 | GO:0004784 |
| 277 | GO:0031077 |
| 278 | GO:0048487 |
| 279 | GO:0032958 |
| 280 | GO:0060174 |
| 281 | GO:2000685 |
| 282 | GO:2000777 |
| 283 | GO:0009583 |
| 284 | GO:0036002 |
| 285 | GO:0051898 |
| 286 | GO:0010760 |
| 287 | GO:0071361 |
| 288 | GO:0051636 |
| 289 | GO:0055009 |
| 290 | GO:0004180 |

|     |            |
|-----|------------|
| 291 | GO:0060020 |
| 292 | GO:0050746 |
| 293 | GO:1900165 |
| 294 | GO:0060697 |
| 295 | GO:0007183 |
| 296 | GO:0035501 |
| 297 | GO:2001141 |
| 298 | GO:0034358 |
| 299 | GO:0009586 |
| 300 | GO:0009234 |
| 301 | GO:0042447 |
| 302 | GO:0043405 |
| 303 | GO:0010934 |
| 304 | GO:0007497 |
| 305 | GO:2001033 |
| 306 | GO:0060700 |
| 307 | GO:0072593 |
| 308 | GO:0015643 |
| 309 | GO:0072332 |
| 310 | GO:0032368 |
| 311 | GO:0034122 |
| 312 | GO:0005110 |
| 313 | GO:0034041 |
| 314 | GO:0002282 |
| 315 | GO:0016705 |
| 316 | GO:0008090 |
| 317 | GO:0060613 |
| 318 | GO:0001937 |
| 319 | GO:0072606 |
| 320 | GO:1900142 |
| 321 | GO:0060311 |
| 322 | GO:0090207 |
| 323 | GO:0042359 |
| 324 | GO:0043184 |
| 325 | GO:0010900 |
| 326 | GO:0038062 |
| 327 | GO:0032226 |
| 328 | GO:0000303 |
| 329 | GO:0010872 |
| 330 | GO:0033578 |
| 331 | GO:0010711 |
| 332 | GO:0061338 |
| 333 | GO:0030497 |

|     |            |
|-----|------------|
| 334 | GO:0004012 |
| 335 | GO:0008747 |
| 336 | GO:0010875 |
| 337 | GO:0030247 |
| 338 | GO:0042309 |
| 339 | GO:0010595 |
| 340 | GO:0016018 |
| 341 | GO:0008817 |
| 342 | GO:0060313 |
| 343 | GO:0055087 |
| 344 | GO:0002035 |
| 345 | GO:0060510 |
| 346 | GO:2001051 |
| 347 | GO:0034369 |
| 348 | GO:0000166 |
| 349 | GO:0004657 |
| 350 | GO:0050961 |
| 351 | GO:0010703 |
| 352 | GO:0004496 |
| 353 | GO:0009720 |
| 354 | GO:0070051 |
| 355 | GO:0048343 |
| 356 | GO:0042267 |
| 357 | GO:0050907 |
| 358 | GO:0043200 |
| 359 | GO:0019262 |
| 360 | GO:0034103 |
| 361 | GO:0008202 |
| 362 | GO:0008028 |
| 363 | GO:0021509 |
| 364 | GO:0002443 |
| 365 | GO:0017158 |
| 366 | GO:0045964 |
| 367 | GO:0050777 |
| 368 | GO:0006560 |
| 369 | GO:0010815 |
| 370 | GO:0042930 |
| 371 | GO:0003828 |
| 372 | GO:0060509 |
| 373 | GO:0016922 |
| 374 | GO:0060129 |
| 375 | GO:0003051 |
| 376 | GO:0000406 |



|     |            |
|-----|------------|
| 377 | GO:0042931 |
| 378 | GO:0048625 |
| 379 | GO:0045239 |
| 380 | GO:0015718 |
| 381 | GO:0010133 |
| 382 | GO:0034755 |
| 383 | GO:0019166 |
| 384 | GO:0060765 |
| 385 | GO:0042660 |
| 386 | hsa04974   |
| 387 | GO:0050327 |
| 388 | GO:0034466 |
| 389 | GO:0005534 |
| 390 | GO:0008061 |
| 391 | GO:0046548 |
| 392 | GO:0002820 |
| 393 | GO:0008360 |
| 394 | GO:0003104 |
| 395 | GO:0030145 |
| 396 | GO:0051084 |
| 397 | GO:0008299 |
| 398 | GO:0060325 |
| 399 | GO:0048549 |
| 400 | GO:0006869 |
| 401 | GO:0035630 |
| 402 | GO:0004333 |
| 403 | GO:0050051 |
| 404 | GO:0006576 |
| 405 | GO:0050795 |
| 406 | GO:0070541 |
| 407 | GO:0043129 |
| 408 | GO:0005041 |
| 409 | GO:0021912 |
| 410 | GO:0010764 |
| 411 | GO:0046168 |
| 412 | GO:0046333 |
| 413 | GO:0021772 |
| 414 | GO:0031102 |
| 415 | GO:0001300 |
| 416 | GO:0035473 |
| 417 | GO:0032181 |
| 418 | GO:0051387 |
| 419 | GO:0033299 |

|     |            |
|-----|------------|
| 420 | GO:0042157 |
| 421 | GO:0071230 |
| 422 | GO:0005762 |
| 423 | GO:0052871 |
| 424 | GO:0007289 |
| 425 | GO:0006106 |
| 426 | GO:0021913 |
| 427 | GO:0070326 |
| 428 | GO:0034145 |
| 429 | GO:0015079 |
| 430 | GO:0045429 |
| 431 | GO:0016500 |
| 432 | GO:0070576 |
| 433 | GO:0035478 |
| 434 | GO:0008428 |
| 435 | GO:0009100 |
| 436 | GO:0006741 |
| 437 | GO:0045906 |
| 438 | GO:0043295 |
| 439 | GO:0061304 |
| 440 | GO:0032302 |
| 441 | GO:0097193 |
| 442 | GO:0032809 |
| 443 | GO:2001199 |
| 444 | GO:0071503 |
| 445 | GO:0030949 |
| 446 | GO:0010917 |
| 447 | GO:0019825 |
| 448 | GO:0001786 |
| 449 | GO:0090321 |
| 450 | GO:0006801 |
| 451 | GO:0090037 |
| 452 | GO:0033145 |
| 453 | GO:0019439 |
| 454 | GO:0010972 |
| 455 | GO:0021681 |
| 456 | GO:0017038 |
| 457 | GO:0050953 |
| 458 | GO:0050918 |
| 459 | GO:0060035 |
| 460 | GO:0010498 |
| 461 | GO:0051659 |
| 462 | GO:0043178 |

|     |            |
|-----|------------|
| 463 | GO:0019367 |
| 464 | GO:0048144 |
| 465 | GO:0030184 |
| 466 | GO:0070670 |
| 467 | GO:0070328 |
| 468 | GO:0055010 |
| 469 | GO:0030492 |
| 470 | GO:0042371 |
| 471 | GO:0048598 |
| 472 | GO:0016332 |
| 473 | GO:0002551 |
| 474 | GO:0042627 |
| 475 | GO:0001763 |
| 476 | GO:0060666 |
| 477 | GO:0043498 |
| 478 | GO:0072061 |
| 479 | GO:0004874 |
| 480 | GO:0001844 |
| 481 | GO:0005608 |
| 482 | GO:0008334 |
| 483 | GO:0030950 |
| 484 | GO:0060128 |
| 485 | GO:0004181 |
| 486 | GO:0060482 |
| 487 | GO:0055093 |
| 488 | GO:0042737 |
| 489 | GO:0070886 |
| 490 | GO:0016556 |
| 491 | GO:0040007 |
| 492 | GO:0072060 |
| 493 | GO:0007250 |
| 494 | GO:0005104 |
| 495 | GO:0010826 |
| 496 | GO:0071241 |
| 497 | GO:0033552 |
| 498 | GO:0072236 |
| 499 | GO:0048850 |
| 500 | GO:0004598 |

(10) Dataset  $D_{10}$

a) MaxRel features list

| Rank | Feature name |
|------|--------------|
| 1    | GO:0030449   |

|    |            |
|----|------------|
| 2  | hsa05150   |
| 3  | GO:0034189 |
| 4  | GO:0038025 |
| 5  | hsa04610   |
| 6  | GO:0004866 |
| 7  | GO:0001970 |
| 8  | GO:1900006 |
| 9  | GO:0006956 |
| 10 | GO:0071953 |
| 11 | GO:0031109 |
| 12 | GO:0032432 |
| 13 | GO:0043537 |
| 14 | GO:0042554 |
| 15 | GO:0034436 |
| 16 | GO:0034437 |
| 17 | GO:0010711 |
| 18 | GO:0060311 |
| 19 | GO:0034346 |
| 20 | GO:0060313 |
| 21 | GO:0010703 |
| 22 | GO:0034103 |
| 23 | GO:0006957 |
| 24 | GO:0071482 |
| 25 | GO:0006958 |
| 26 | GO:0034447 |
| 27 | GO:0035645 |
| 28 | GO:0051651 |
| 29 | GO:0046911 |
| 30 | GO:0032805 |
| 31 | GO:0051400 |
| 32 | GO:0016495 |
| 33 | GO:0043331 |
| 34 | GO:0048844 |
| 35 | GO:0051389 |
| 36 | GO:0001798 |
| 37 | GO:0021762 |
| 38 | GO:0030949 |
| 39 | GO:0038026 |
| 40 | GO:0043536 |
| 41 | GO:0034021 |
| 42 | GO:0001315 |
| 43 | GO:0003069 |
| 44 | GO:0051000 |

|    |            |
|----|------------|
| 45 | GO:0050665 |
| 46 | GO:0048773 |
| 47 | GO:0045429 |
| 48 | GO:0043183 |
| 49 | GO:0042088 |
| 50 | GO:0032757 |
| 51 | GO:0060342 |
| 52 | GO:0032467 |
| 53 | GO:0032722 |
| 54 | GO:0051856 |
| 55 | GO:0043206 |
| 56 | GO:0009409 |
| 57 | GO:0060011 |
| 58 | GO:0003273 |
| 59 | GO:0045541 |
| 60 | GO:0014043 |
| 61 | GO:0002282 |
| 62 | GO:0005615 |
| 63 | GO:0043498 |
| 64 | GO:0045766 |
| 65 | GO:0001666 |
| 66 | GO:0004962 |
| 67 | GO:0043117 |
| 68 | GO:0002042 |
| 69 | GO:0032958 |
| 70 | GO:0010477 |
| 71 | GO:0070434 |
| 72 | GO:0001910 |
| 73 | GO:0001938 |
| 74 | GO:0070430 |
| 75 | GO:0004784 |
| 76 | GO:0016046 |
| 77 | GO:0032732 |
| 78 | GO:0002693 |
| 79 | GO:0002457 |
| 80 | GO:0004252 |
| 81 | GO:0032930 |
| 82 | GO:0030195 |
| 83 | GO:0042253 |
| 84 | GO:2000256 |
| 85 | GO:0042033 |
| 86 | GO:0009597 |
| 87 | GO:0042231 |

|     |            |
|-----|------------|
| 88  | GO:0007256 |
| 89  | GO:0045359 |
| 90  | GO:1900086 |
| 91  | GO:0005172 |
| 92  | GO:0042660 |
| 93  | GO:0042116 |
| 94  | GO:0001300 |
| 95  | GO:0002537 |
| 96  | GO:0035458 |
| 97  | GO:0034405 |
| 98  | GO:0001974 |
| 99  | GO:0032855 |
| 100 | GO:0045103 |
| 101 | GO:0000303 |
| 102 | GO:0010575 |
| 103 | GO:0034185 |
| 104 | GO:0052033 |
| 105 | GO:0046813 |
| 106 | GO:0010001 |
| 107 | GO:0072332 |
| 108 | GO:0043154 |
| 109 | GO:0010863 |
| 110 | GO:0042159 |
| 111 | GO:0002575 |
| 112 | GO:0006801 |
| 113 | GO:0051580 |
| 114 | GO:0044464 |
| 115 | GO:0010625 |
| 116 | GO:0006917 |
| 117 | GO:0005520 |
| 118 | GO:0032488 |
| 119 | GO:0005041 |
| 120 | GO:0071360 |
| 121 | GO:0001569 |
| 122 | GO:0033627 |
| 123 | GO:0048678 |
| 124 | GO:0031798 |
| 125 | GO:0038052 |
| 126 | GO:0010466 |
| 127 | GO:0060745 |
| 128 | GO:0060754 |
| 129 | GO:2001028 |
| 130 | GO:0002291 |

|     |            |
|-----|------------|
| 131 | GO:0008228 |
| 132 | GO:0055093 |
| 133 | GO:0007252 |
| 134 | GO:0010760 |
| 135 | GO:0031714 |
| 136 | GO:0002446 |
| 137 | GO:0034056 |
| 138 | GO:0008209 |
| 139 | GO:0036020 |
| 140 | GO:0002523 |
| 141 | GO:0005586 |
| 142 | GO:0004944 |
| 143 | GO:0045356 |
| 144 | GO:0033364 |
| 145 | GO:0033081 |
| 146 | GO:0000302 |
| 147 | GO:0019934 |
| 148 | GO:0060319 |
| 149 | GO:0002384 |
| 150 | GO:0005072 |
| 151 | GO:0007568 |
| 152 | hsa05323   |
| 153 | GO:0045671 |
| 154 | GO:0090031 |
| 155 | GO:0071222 |
| 156 | GO:0048845 |
| 157 | GO:0005010 |
| 158 | GO:0032497 |
| 159 | GO:0043200 |
| 160 | GO:0050777 |
| 161 | GO:0042095 |
| 162 | GO:0048739 |
| 163 | GO:0045343 |
| 164 | hsa05133   |
| 165 | GO:0050829 |
| 166 | GO:0035924 |
| 167 | GO:0071359 |
| 168 | GO:0048661 |
| 169 | GO:0030229 |
| 170 | GO:0014896 |
| 171 | GO:0014904 |
| 172 | GO:0009441 |
| 173 | GO:0060020 |

|     |            |
|-----|------------|
| 174 | GO:0000189 |
| 175 | GO:0031701 |
| 176 | GO:0010875 |
| 177 | GO:0048246 |
| 178 | GO:0008201 |
| 179 | GO:0042056 |
| 180 | GO:0061045 |
| 181 | GO:0070022 |
| 182 | GO:0001957 |
| 183 | GO:0008217 |
| 184 | GO:0019430 |
| 185 | GO:0060346 |
| 186 | GO:0010764 |
| 187 | GO:0060129 |
| 188 | GO:0060228 |
| 189 | GO:0051881 |
| 190 | GO:0051272 |
| 191 | GO:0070091 |
| 192 | GO:0019966 |
| 193 | GO:0002551 |
| 194 | GO:0060312 |
| 195 | GO:0048245 |
| 196 | GO:0014826 |
| 197 | GO:0045084 |
| 198 | GO:0019836 |
| 199 | GO:0008360 |
| 200 | GO:0060128 |
| 201 | GO:2000379 |
| 202 | GO:0051142 |
| 203 | GO:0030516 |
| 204 | GO:0060750 |
| 205 | GO:0031017 |
| 206 | GO:0032809 |
| 207 | GO:0032270 |
| 208 | GO:0005534 |
| 209 | GO:0043325 |
| 210 | GO:0046620 |
| 211 | GO:0001968 |
| 212 | GO:0034363 |
| 213 | GO:0005114 |
| 214 | GO:0071312 |
| 215 | GO:0070301 |
| 216 | GO:2000378 |



|     |            |
|-----|------------|
| 217 | GO:0048598 |
| 218 | GO:0021940 |
| 219 | GO:0060052 |
| 220 | GO:0002262 |
| 221 | GO:0060744 |
| 222 | GO:0072563 |
| 223 | GO:0019064 |
| 224 | GO:0016209 |
| 225 | GO:0007250 |
| 226 | GO:0010873 |
| 227 | GO:0002429 |
| 228 | GO:0055090 |
| 229 | GO:0034358 |
| 230 | GO:0046629 |
| 231 | GO:0008395 |
| 232 | GO:0051607 |
| 233 | GO:0034616 |
| 234 | GO:0010544 |
| 235 | GO:0007183 |
| 236 | GO:0035624 |
| 237 | GO:0051873 |
| 238 | GO:0006707 |
| 239 | GO:0030308 |
| 240 | GO:0043559 |
| 241 | GO:0009881 |
| 242 | GO:0060068 |
| 243 | GO:0007263 |
| 244 | GO:0007497 |
| 245 | GO:0090037 |
| 246 | GO:0038091 |
| 247 | GO:0046716 |
| 248 | GO:0006940 |
| 249 | GO:0051926 |
| 250 | GO:0030346 |
| 251 | GO:0060527 |
| 252 | GO:0021517 |
| 253 | GO:0051898 |
| 254 | GO:0060510 |
| 255 | GO:0060644 |
| 256 | GO:0019049 |
| 257 | GO:0070373 |
| 258 | GO:0001781 |
| 259 | GO:0030284 |

|     |            |
|-----|------------|
| 260 | GO:0030214 |
| 261 | GO:0032700 |
| 262 | GO:0070541 |
| 263 | GO:0002218 |
| 264 | GO:0014909 |
| 265 | GO:0042094 |
| 266 | GO:0060090 |
| 267 | GO:0002504 |
| 268 | GO:0090265 |
| 269 | GO:0007584 |
| 270 | GO:0005576 |
| 271 | GO:2000502 |
| 272 | GO:0035684 |
| 273 | GO:0061302 |
| 274 | GO:0031727 |
| 275 | GO:0042583 |
| 276 | GO:0045630 |
| 277 | GO:0033552 |
| 278 | GO:0043171 |
| 279 | GO:0071456 |
| 280 | GO:0070483 |
| 281 | GO:0071356 |
| 282 | GO:0071346 |
| 283 | GO:0035630 |
| 284 | GO:0051712 |
| 285 | GO:0060509 |
| 286 | GO:0009408 |
| 287 | GO:0035767 |
| 288 | GO:0048009 |
| 289 | GO:0071813 |
| 290 | GO:0003032 |
| 291 | GO:0008090 |
| 292 | GO:0060561 |
| 293 | GO:0006290 |
| 294 | GO:0004943 |
| 295 | GO:0004876 |
| 296 | GO:0060364 |
| 297 | GO:0001850 |
| 298 | GO:0002462 |
| 299 | GO:0022617 |
| 300 | GO:0035666 |
| 301 | GO:0034138 |
| 302 | GO:0002756 |

|     |            |
|-----|------------|
| 303 | hsa04623   |
| 304 | GO:0006898 |
| 305 | GO:0016942 |
| 306 | GO:0051280 |
| 307 | GO:0060591 |
| 308 | GO:0016004 |
| 309 | GO:0042060 |
| 310 | GO:0071347 |
| 311 | GO:0016056 |
| 312 | GO:0051918 |
| 313 | GO:0010804 |
| 314 | GO:0001763 |
| 315 | GO:0051054 |
| 316 | GO:0001540 |
| 317 | GO:0001934 |
| 318 | GO:0045188 |
| 319 | GO:0045079 |
| 320 | GO:0045076 |
| 321 | GO:0051092 |
| 322 | GO:0005579 |
| 323 | GO:0001869 |
| 324 | GO:0010897 |
| 325 | GO:2000270 |
| 326 | GO:0032481 |
| 327 | GO:0032269 |
| 328 | GO:0060729 |
| 329 | GO:0002021 |
| 330 | GO:0085029 |
| 331 | GO:0032387 |
| 332 | GO:0010288 |
| 333 | GO:0031953 |
| 334 | GO:2000121 |
| 335 | GO:0060137 |
| 336 | GO:2000427 |
| 337 | GO:0071503 |
| 338 | GO:0017038 |
| 339 | GO:0035478 |
| 340 | GO:0000003 |
| 341 | GO:0090321 |
| 342 | GO:0009590 |
| 343 | GO:0001567 |
| 344 | GO:0035473 |
| 345 | GO:0052871 |

|     |            |
|-----|------------|
| 346 | GO:0070287 |
| 347 | hsa05164   |
| 348 | GO:0051795 |
| 349 | GO:0010574 |
| 350 | GO:0002032 |
| 351 | GO:0060394 |
| 352 | GO:0030168 |
| 353 | GO:0031575 |
| 354 | GO:0071230 |
| 355 | GO:0009586 |
| 356 | GO:0007565 |
| 357 | GO:0032691 |
| 358 | GO:0060545 |
| 359 | GO:0004301 |
| 360 | GO:0034382 |
| 361 | GO:0043405 |
| 362 | GO:0009615 |
| 363 | GO:0070926 |
| 364 | GO:0031077 |
| 365 | GO:0050689 |
| 366 | GO:0045869 |
| 367 | GO:0015920 |
| 368 | GO:0005105 |
| 369 | GO:0033700 |
| 370 | GO:0060763 |
| 371 | GO:0042832 |
| 372 | GO:0050927 |
| 373 | GO:0051602 |
| 374 | GO:0051098 |
| 375 | GO:0009314 |
| 376 | GO:0030828 |
| 377 | GO:0048386 |
| 378 | GO:0032364 |
| 379 | GO:0032707 |
| 380 | GO:0046677 |
| 381 | GO:0008089 |
| 382 | GO:0048864 |
| 383 | GO:0050921 |
| 384 | GO:0051894 |
| 385 | GO:0045423 |
| 386 | GO:0010987 |
| 387 | GO:0038063 |
| 388 | GO:0019826 |

|     |            |
|-----|------------|
| 389 | GO:0045414 |
| 390 | GO:0017162 |
| 391 | GO:0048635 |
| 392 | GO:0010595 |
| 393 | GO:0009612 |
| 394 | GO:0005585 |
| 395 | GO:0042310 |
| 396 | GO:0030335 |
| 397 | GO:0032355 |
| 398 | GO:0007184 |
| 399 | GO:0001875 |
| 400 | GO:0031702 |
| 401 | GO:0032494 |
| 402 | GO:0033141 |
| 403 | GO:0006979 |
| 404 | GO:0014911 |
| 405 | GO:0051659 |
| 406 | hsa05143   |
| 407 | GO:0071361 |
| 408 | GO:0042307 |
| 409 | GO:1900165 |
| 410 | GO:0048520 |
| 411 | GO:2000533 |
| 412 | GO:0010934 |
| 413 | GO:0002033 |
| 414 | GO:0010189 |
| 415 | GO:1900142 |
| 416 | hsa04145   |
| 417 | GO:0010718 |
| 418 | GO:0032417 |
| 419 | GO:0032909 |
| 420 | GO:0032720 |
| 421 | GO:0031093 |
| 422 | GO:0008083 |
| 423 | GO:0030247 |
| 424 | GO:0002758 |
| 425 | GO:0015643 |
| 426 | GO:0070326 |
| 427 | GO:0042993 |
| 428 | GO:0008285 |
| 429 | GO:0050790 |
| 430 | GO:0071391 |
| 431 | GO:0060087 |

|     |            |
|-----|------------|
| 432 | GO:0035082 |
| 433 | GO:0042627 |
| 434 | GO:0042954 |
| 435 | GO:0060123 |
| 436 | GO:0001596 |
| 437 | GO:0045358 |
| 438 | GO:0001867 |
| 439 | GO:0042613 |
| 440 | GO:0060697 |
| 441 | GO:0010519 |
| 442 | GO:0032430 |
| 443 | GO:0051345 |
| 444 | GO:0033299 |
| 445 | GO:0048549 |
| 446 | GO:0009986 |
| 447 | GO:0051005 |
| 448 | GO:0017015 |
| 449 | GO:0007181 |
| 450 | GO:0043065 |
| 451 | hsa05144   |
| 452 | GO:0043410 |
| 453 | GO:0031663 |
| 454 | GO:0001502 |
| 455 | GO:0006029 |
| 456 | GO:0090190 |
| 457 | GO:0006916 |
| 458 | GO:0007021 |
| 459 | GO:0042637 |
| 460 | GO:0060220 |
| 461 | hsa04621   |
| 462 | GO:0034134 |
| 463 | GO:0002224 |
| 464 | GO:0032728 |
| 465 | GO:0030704 |
| 466 | GO:0010902 |
| 467 | GO:0007179 |
| 468 | GO:0048074 |
| 469 | GO:0034142 |
| 470 | GO:0034130 |
| 471 | GO:0044429 |
| 472 | GO:0044146 |
| 473 | GO:2000309 |
| 474 | GO:0060552 |

|     |            |
|-----|------------|
| 475 | GO:0060550 |
| 476 | GO:0071351 |
| 477 | GO:0045785 |
| 478 | GO:0002020 |
| 479 | GO:0043615 |
| 480 | GO:0045725 |
| 481 | GO:0001937 |
| 482 | GO:0045740 |
| 483 | GO:0045768 |
| 484 | GO:0009583 |
| 485 | GO:0051087 |
| 486 | GO:0008354 |
| 487 | GO:0010224 |
| 488 | GO:0032878 |
| 489 | GO:0010888 |
| 490 | GO:0071364 |
| 491 | GO:0010763 |
| 492 | GO:0014834 |
| 493 | GO:0009817 |
| 494 | GO:0070371 |
| 495 | GO:0033591 |
| 496 | GO:0010942 |
| 497 | GO:0046328 |
| 498 | GO:0014910 |
| 499 | GO:0045348 |
| 500 | GO:1900126 |

b) mRMR features list

| Rank | Feature name |
|------|--------------|
| 1    | GO:0030449   |
| 2    | GO:0045343   |
| 3    | hsa05150     |
| 4    | GO:0034189   |
| 5    | GO:0006956   |
| 6    | GO:0043537   |
| 7    | hsa04610     |
| 8    | GO:0042554   |
| 9    | GO:0008395   |
| 10   | GO:0071482   |
| 11   | GO:0002429   |
| 12   | GO:0004866   |
| 13   | GO:1900006   |
| 14   | GO:0048739   |

|    |            |
|----|------------|
| 15 | GO:0001970 |
| 16 | GO:0000003 |
| 17 | GO:0038025 |
| 18 | GO:0060744 |
| 19 | GO:0071953 |
| 20 | GO:0006958 |
| 21 | GO:0031701 |
| 22 | GO:0006957 |
| 23 | GO:0002446 |
| 24 | GO:0031109 |
| 25 | GO:0060364 |
| 26 | GO:0038063 |
| 27 | GO:0046629 |
| 28 | GO:0032432 |
| 29 | GO:0051873 |
| 30 | GO:1900086 |
| 31 | GO:0060011 |
| 32 | GO:0034436 |
| 33 | GO:0002504 |
| 34 | GO:0005586 |
| 35 | GO:0035645 |
| 36 | GO:0072332 |
| 37 | GO:0005041 |
| 38 | GO:0034021 |
| 39 | GO:0004252 |
| 40 | GO:0007183 |
| 41 | GO:0006438 |
| 42 | GO:0034346 |
| 43 | GO:0008228 |
| 44 | GO:0060090 |
| 45 | GO:0043206 |
| 46 | GO:0031575 |
| 47 | GO:0051400 |
| 48 | GO:0071503 |
| 49 | GO:0004832 |
| 50 | GO:0001798 |
| 51 | GO:0034437 |
| 52 | GO:0051272 |
| 53 | GO:0050777 |
| 54 | GO:0035624 |
| 55 | GO:0043331 |
| 56 | GO:0048844 |
| 57 | GO:0035417 |



|     |            |
|-----|------------|
| 58  | GO:0043117 |
| 59  | GO:0017038 |
| 60  | GO:0032930 |
| 61  | GO:0034616 |
| 62  | GO:0010711 |
| 63  | GO:0005105 |
| 64  | GO:0050665 |
| 65  | GO:0042613 |
| 66  | GO:0034447 |
| 67  | GO:0001867 |
| 68  | GO:0030949 |
| 69  | GO:0045423 |
| 70  | GO:0042490 |
| 71  | GO:0035478 |
| 72  | GO:0060311 |
| 73  | GO:0008119 |
| 74  | GO:0038026 |
| 75  | GO:0010760 |
| 76  | GO:0001315 |
| 77  | GO:0001763 |
| 78  | GO:0019064 |
| 79  | GO:0035082 |
| 80  | GO:0060313 |
| 81  | GO:0031201 |
| 82  | GO:0060342 |
| 83  | GO:0090321 |
| 84  | GO:0001974 |
| 85  | GO:0031714 |
| 86  | GO:0051389 |
| 87  | GO:0019882 |
| 88  | GO:2000270 |
| 89  | GO:0010703 |
| 90  | GO:0043405 |
| 91  | GO:0034358 |
| 92  | GO:0002042 |
| 93  | GO:0032691 |
| 94  | GO:0042583 |
| 95  | GO:0032722 |
| 96  | GO:0035473 |
| 97  | GO:0005597 |
| 98  | GO:0034103 |
| 99  | GO:0034405 |
| 100 | GO:0004301 |

|     |            |
|-----|------------|
| 101 | GO:0060052 |
| 102 | GO:0031362 |
| 103 | GO:0051651 |
| 104 | GO:0007184 |
| 105 | GO:0003069 |
| 106 | GO:0004944 |
| 107 | GO:0005540 |
| 108 | GO:0004962 |
| 109 | GO:0005537 |
| 110 | GO:0043183 |
| 111 | GO:0070287 |
| 112 | GO:0010575 |
| 113 | GO:0006705 |
| 114 | GO:0016209 |
| 115 | GO:0045414 |
| 116 | GO:0006917 |
| 117 | GO:0043536 |
| 118 | GO:0032226 |
| 119 | GO:0046911 |
| 120 | GO:0031491 |
| 121 | GO:0050689 |
| 122 | GO:0004943 |
| 123 | GO:0048773 |
| 124 | GO:1900165 |
| 125 | GO:0009409 |
| 126 | GO:0032395 |
| 127 | GO:0042116 |
| 128 | GO:0060123 |
| 129 | GO:0010001 |
| 130 | GO:2000533 |
| 131 | GO:0051856 |
| 132 | GO:0033364 |
| 133 | GO:0014909 |
| 134 | GO:0055087 |
| 135 | GO:0016495 |
| 136 | GO:0051635 |
| 137 | GO:0007263 |
| 138 | GO:0042147 |
| 139 | GO:0017162 |
| 140 | GO:0010369 |
| 141 | GO:0032805 |
| 142 | GO:0007256 |
| 143 | GO:0010934 |

|     |            |
|-----|------------|
| 144 | GO:2001028 |
| 145 | GO:0060068 |
| 146 | GO:0004876 |
| 147 | GO:0045076 |
| 148 | GO:0055090 |
| 149 | GO:0014043 |
| 150 | GO:0042461 |
| 151 | GO:0032467 |
| 152 | GO:0006029 |
| 153 | GO:0035666 |
| 154 | GO:0016409 |
| 155 | GO:0004784 |
| 156 | GO:1900142 |
| 157 | GO:0071360 |
| 158 | GO:0034185 |
| 159 | GO:0002033 |
| 160 | GO:0035924 |
| 161 | GO:0002032 |
| 162 | GO:0045429 |
| 163 | GO:0034365 |
| 164 | GO:0010501 |
| 165 | GO:0005114 |
| 166 | GO:0060750 |
| 167 | GO:0001567 |
| 168 | GO:0032876 |
| 169 | GO:0001850 |
| 170 | GO:0008209 |
| 171 | GO:0006801 |
| 172 | GO:0038062 |
| 173 | GO:0055093 |
| 174 | GO:0008187 |
| 175 | GO:0009597 |
| 176 | GO:0016554 |
| 177 | GO:0032757 |
| 178 | GO:0042310 |
| 179 | GO:0060754 |
| 180 | GO:0002523 |
| 181 | GO:0005010 |
| 182 | GO:0030621 |
| 183 | GO:0043171 |
| 184 | GO:0034445 |
| 185 | GO:0021762 |
| 186 | GO:0019966 |

|     |            |
|-----|------------|
| 187 | GO:0007603 |
| 188 | GO:0005488 |
| 189 | GO:0051000 |
| 190 | GO:0048549 |
| 191 | GO:0055106 |
| 192 | GO:0035458 |
| 193 | GO:0019826 |
| 194 | GO:0031616 |
| 195 | GO:0002462 |
| 196 | GO:0050790 |
| 197 | GO:0007252 |
| 198 | GO:0010873 |
| 199 | GO:0005520 |
| 200 | GO:0010987 |
| 201 | GO:0043498 |
| 202 | GO:0003746 |
| 203 | GO:0051148 |
| 204 | GO:0034056 |
| 205 | GO:0034138 |
| 206 | GO:0017176 |
| 207 | GO:0009881 |
| 208 | GO:0035767 |
| 209 | GO:0005579 |
| 210 | GO:0051098 |
| 211 | GO:0061302 |
| 212 | GO:0006707 |
| 213 | GO:0019799 |
| 214 | GO:0001666 |
| 215 | GO:0045953 |
| 216 | GO:0006944 |
| 217 | GO:0042088 |
| 218 | GO:0004085 |
| 219 | GO:0090031 |
| 220 | GO:0052871 |
| 221 | GO:0004509 |
| 222 | GO:0030195 |
| 223 | GO:0051881 |
| 224 | GO:0010466 |
| 225 | GO:0046359 |
| 226 | GO:0019836 |
| 227 | GO:0038091 |
| 228 | GO:0010804 |
| 229 | GO:0047006 |

|     |            |
|-----|------------|
| 230 | GO:0002756 |
| 231 | GO:0032417 |
| 232 | GO:0060745 |
| 233 | GO:0042393 |
| 234 | GO:0046813 |
| 235 | GO:0043196 |
| 236 | GO:0010875 |
| 237 | GO:0031702 |
| 238 | GO:0001968 |
| 239 | GO:0032855 |
| 240 | GO:0004016 |
| 241 | GO:0014826 |
| 242 | GO:0005172 |
| 243 | GO:0016922 |
| 244 | GO:0010897 |
| 245 | GO:2000095 |
| 246 | GO:0007062 |
| 247 | GO:0085029 |
| 248 | GO:0034122 |
| 249 | GO:0045541 |
| 250 | GO:0019835 |
| 251 | GO:0009590 |
| 252 | GO:0010821 |
| 253 | GO:0005615 |
| 254 | GO:0032481 |
| 255 | GO:0001087 |
| 256 | GO:0030247 |
| 257 | GO:0033781 |
| 258 | GO:0000303 |
| 259 | GO:0033116 |
| 260 | GO:0010522 |
| 261 | GO:0050711 |
| 262 | GO:0042253 |
| 263 | GO:0010988 |
| 264 | GO:0090037 |
| 265 | GO:0004441 |
| 266 | GO:0032488 |
| 267 | GO:0001093 |
| 268 | GO:0032958 |
| 269 | GO:0006940 |
| 270 | GO:0021858 |
| 271 | GO:0090200 |
| 272 | GO:0060346 |

|     |            |
|-----|------------|
| 273 | GO:0070584 |
| 274 | GO:0033299 |
| 275 | GO:0035501 |
| 276 | GO:0001596 |
| 277 | GO:0045766 |
| 278 | GO:0001578 |
| 279 | GO:0097241 |
| 280 | GO:0051280 |
| 281 | GO:2000256 |
| 282 | GO:0070384 |
| 283 | GO:0032938 |
| 284 | GO:0001869 |
| 285 | GO:0010863 |
| 286 | GO:0016422 |
| 287 | GO:0034755 |
| 288 | GO:0045359 |
| 289 | GO:0070206 |
| 290 | GO:0006290 |
| 291 | GO:0006433 |
| 292 | GO:0006741 |
| 293 | GO:0045103 |
| 294 | GO:0042406 |
| 295 | GO:0007250 |
| 296 | GO:0060220 |
| 297 | GO:0010477 |
| 298 | GO:0001011 |
| 299 | GO:0032364 |
| 300 | GO:0042033 |
| 301 | GO:0046877 |
| 302 | GO:0032430 |
| 303 | GO:0006168 |
| 304 | GO:0006898 |
| 305 | GO:0002575 |
| 306 | GO:0010718 |
| 307 | GO:0002282 |
| 308 | GO:0033961 |
| 309 | GO:0004827 |
| 310 | GO:0035987 |
| 311 | GO:0008217 |
| 312 | GO:0003032 |
| 313 | GO:0010189 |
| 314 | GO:2000379 |
| 315 | GO:0071248 |

|     |            |
|-----|------------|
| 316 | GO:0003273 |
| 317 | GO:0060228 |
| 318 | GO:0019207 |
| 319 | GO:0042231 |
| 320 | GO:0048243 |
| 321 | GO:0005585 |
| 322 | GO:0033081 |
| 323 | GO:2000723 |
| 324 | GO:0016056 |
| 325 | GO:0050674 |
| 326 | GO:0008390 |
| 327 | GO:0070524 |
| 328 | GO:0048598 |
| 329 | GO:0043570 |
| 330 | GO:0001910 |
| 331 | GO:0002001 |
| 332 | GO:0001957 |
| 333 | GO:0070541 |
| 334 | GO:0045607 |
| 335 | GO:0008200 |
| 336 | GO:0050927 |
| 337 | GO:0031507 |
| 338 | GO:0032510 |
| 339 | GO:0030127 |
| 340 | GO:0070434 |
| 341 | GO:0060948 |
| 342 | GO:0090207 |
| 343 | GO:0036020 |
| 344 | GO:0019067 |
| 345 | GO:0030308 |
| 346 | GO:0060319 |
| 347 | GO:0017112 |
| 348 | GO:0060436 |
| 349 | GO:0002693 |
| 350 | GO:0010288 |
| 351 | GO:0035545 |
| 352 | GO:0032786 |
| 353 | GO:0043559 |
| 354 | GO:0045084 |
| 355 | GO:0035730 |
| 356 | GO:0019377 |
| 357 | GO:0019439 |
| 358 | GO:0043325 |

|     |            |
|-----|------------|
| 359 | GO:0030704 |
| 360 | GO:0001938 |
| 361 | GO:0016272 |
| 362 | GO:0035978 |
| 363 | GO:0010917 |
| 364 | GO:0033145 |
| 365 | GO:0001300 |
| 366 | GO:0070430 |
| 367 | GO:0060229 |
| 368 | GO:0050677 |
| 369 | GO:0051918 |
| 370 | GO:0008456 |
| 371 | GO:0042660 |
| 372 | GO:0001919 |
| 373 | GO:0042954 |
| 374 | GO:0045356 |
| 375 | GO:0070664 |
| 376 | GO:0046620 |
| 377 | GO:0060213 |
| 378 | GO:0032463 |
| 379 | GO:0045309 |
| 380 | GO:0031077 |
| 381 | hsa04623   |
| 382 | GO:0003743 |
| 383 | GO:0002457 |
| 384 | GO:0042627 |
| 385 | GO:0035500 |
| 386 | GO:0060047 |
| 387 | GO:0031134 |
| 388 | GO:0021772 |
| 389 | GO:0016046 |
| 390 | GO:0010498 |
| 391 | GO:0030284 |
| 392 | GO:0061115 |
| 393 | GO:0034237 |
| 394 | GO:0048074 |
| 395 | GO:0071359 |
| 396 | GO:0001991 |
| 397 | GO:0035732 |
| 398 | GO:0061045 |
| 399 | GO:0045820 |
| 400 | GO:0048242 |
| 401 | GO:0010519 |



|     |            |
|-----|------------|
| 402 | GO:0072686 |
| 403 | GO:0032732 |
| 404 | GO:0071779 |
| 405 | GO:0060129 |
| 406 | GO:0019262 |
| 407 | GO:0042637 |
| 408 | GO:0051092 |
| 409 | GO:0034220 |
| 410 | GO:0031052 |
| 411 | GO:0060697 |
| 412 | GO:2000777 |
| 413 | GO:0009586 |
| 414 | hsa05133   |
| 415 | GO:0030229 |
| 416 | GO:0060496 |
| 417 | GO:0019673 |
| 418 | GO:2000820 |
| 419 | GO:0070026 |
| 420 | GO:0060394 |
| 421 | GO:0001844 |
| 422 | GO:0002262 |
| 423 | GO:0007497 |
| 424 | GO:0005930 |
| 425 | GO:0008201 |
| 426 | GO:0010544 |
| 427 | GO:0008747 |
| 428 | GO:0009249 |
| 429 | GO:0033627 |
| 430 | GO:0002035 |
| 431 | GO:0019430 |
| 432 | GO:0060661 |
| 433 | GO:0060545 |
| 434 | GO:0019049 |
| 435 | GO:0003131 |
| 436 | GO:0010826 |
| 437 | GO:0060137 |
| 438 | GO:0006700 |
| 439 | GO:0006508 |
| 440 | GO:0042335 |
| 441 | GO:0010900 |
| 442 | GO:0048025 |
| 443 | GO:0097057 |
| 444 | GO:0052033 |

|     |            |
|-----|------------|
| 445 | GO:0051345 |
| 446 | GO:0031798 |
| 447 | GO:0070352 |
| 448 | GO:0016139 |
| 449 | GO:0019509 |
| 450 | GO:0009615 |
| 451 | GO:0050840 |
| 452 | GO:2001033 |
| 453 | GO:2000378 |
| 454 | GO:0004169 |
| 455 | GO:0033159 |
| 456 | GO:0032368 |
| 457 | GO:0030346 |
| 458 | GO:0030214 |
| 459 | GO:0070926 |
| 460 | GO:0035731 |
| 461 | GO:0003824 |
| 462 | GO:0071813 |
| 463 | GO:0090230 |
| 464 | GO:0070022 |
| 465 | GO:0043576 |
| 466 | GO:0016192 |
| 467 | GO:0010165 |
| 468 | GO:0070075 |
| 469 | GO:0001569 |
| 470 | GO:0046703 |
| 471 | GO:0000302 |
| 472 | GO:0034369 |
| 473 | GO:0045056 |
| 474 | GO:0022617 |
| 475 | GO:0043422 |
| 476 | GO:0010700 |
| 477 | GO:0071208 |
| 478 | GO:0002537 |
| 479 | GO:0060510 |
| 480 | GO:0051101 |
| 481 | GO:2000685 |
| 482 | GO:0003918 |
| 483 | GO:0038052 |
| 484 | GO:0060879 |
| 485 | GO:0051271 |
| 486 | GO:0034363 |
| 487 | GO:0060128 |

|     |            |
|-----|------------|
| 488 | GO:0032020 |
| 489 | GO:0007584 |
| 490 | GO:0016556 |
| 491 | GO:0048678 |
| 492 | GO:0035092 |
| 493 | GO:0004473 |
| 494 | GO:0072563 |
| 495 | GO:2000504 |
| 496 | GO:0034134 |
| 497 | GO:0005602 |
| 498 | hsa04145   |
| 499 | GO:0072163 |
| 500 | GO:0033093 |
