# Supplementary material for: Gene Ontology and KEGG Enrichment Analyses of Genes Related to Age-Related Macular Degeneration
Source: Hindawi journal article supplement (doi:10.1155/2014/450386), 2014-01-01
Supplement: f1 [file 450386.f1.zip]

**Supplementary Material III.** The SNs, SPs, ACCs and MCCs obtained by IFS and SMO for each dataset  $D_i$ .

(1) Dataset  $D_1$

| Number of features | SN       | SP       | ACC      | MCC      |
|--------------------|----------|----------|----------|----------|
| 4                  | 0.461538 | 0.989744 | 0.901709 | 0.601556 |
| 5                  | 0.461538 | 0.989744 | 0.901709 | 0.601556 |
| 6                  | 0.435897 | 0.994872 | 0.901709 | 0.602464 |
| 7                  | 0.410256 | 0.984615 | 0.888889 | 0.538778 |
| 8                  | 0.410256 | 0.994872 | 0.897436 | 0.581685 |
| 9                  | 0.461538 | 0.989744 | 0.901709 | 0.601556 |
| 10                 | 0.512821 | 0.989744 | 0.910256 | 0.641744 |
| 11                 | 0.461538 | 0.989744 | 0.901709 | 0.601556 |
| 12                 | 0.487179 | 0.984615 | 0.901709 | 0.602454 |
| 13                 | 0.538462 | 0.979487 | 0.905983 | 0.624875 |
| 14                 | 0.487179 | 0.969231 | 0.888889 | 0.550633 |
| 15                 | 0.487179 | 0.969231 | 0.888889 | 0.550633 |
| 16                 | 0.512821 | 0.969231 | 0.893162 | 0.571643 |
| 17                 | 0.538462 | 0.964103 | 0.893162 | 0.57707  |
| 18                 | 0.538462 | 0.958974 | 0.888889 | 0.562614 |
| 19                 | 0.564103 | 0.953846 | 0.888889 | 0.569387 |
| 20                 | 0.589744 | 0.958974 | 0.897436 | 0.603212 |
| 21                 | 0.589744 | 0.953846 | 0.893162 | 0.589617 |
| 22                 | 0.564103 | 0.948718 | 0.884615 | 0.556243 |
| 23                 | 0.589744 | 0.948718 | 0.888889 | 0.576566 |
| 24                 | 0.589744 | 0.953846 | 0.893162 | 0.589617 |
| 25                 | 0.564103 | 0.953846 | 0.888889 | 0.569387 |
| 26                 | 0.564103 | 0.958974 | 0.893162 | 0.583095 |
| 27                 | 0.564103 | 0.958974 | 0.893162 | 0.583095 |
| 28                 | 0.564103 | 0.964103 | 0.897436 | 0.597415 |
| 29                 | 0.564103 | 0.958974 | 0.893162 | 0.583095 |
| 30                 | 0.564103 | 0.958974 | 0.893162 | 0.583095 |
| 31                 | 0.564103 | 0.974359 | 0.905983 | 0.628112 |
| 32                 | 0.564103 | 0.974359 | 0.905983 | 0.628112 |
| 33                 | 0.564103 | 0.974359 | 0.905983 | 0.628112 |
| 34                 | 0.564103 | 0.974359 | 0.905983 | 0.628112 |
| 35                 | 0.564103 | 0.974359 | 0.905983 | 0.628112 |
| 36                 | 0.564103 | 0.974359 | 0.905983 | 0.628112 |
| 37                 | 0.564103 | 0.974359 | 0.905983 | 0.628112 |
| 38                 | 0.564103 | 0.969231 | 0.901709 | 0.612401 |
| 39                 | 0.564103 | 0.969231 | 0.901709 | 0.612401 |
| 40                 | 0.564103 | 0.974359 | 0.905983 | 0.628112 |

|    |          |          |          |          |
|----|----------|----------|----------|----------|
| 41 | 0.564103 | 0.974359 | 0.905983 | 0.628112 |
| 42 | 0.589744 | 0.979487 | 0.91453  | 0.664004 |
| 43 | 0.589744 | 0.979487 | 0.91453  | 0.664004 |
| 44 | 0.589744 | 0.979487 | 0.91453  | 0.664004 |
| 45 | 0.589744 | 0.979487 | 0.91453  | 0.664004 |
| 46 | 0.589744 | 0.979487 | 0.91453  | 0.664004 |
| 47 | 0.589744 | 0.979487 | 0.91453  | 0.664004 |
| 48 | 0.589744 | 0.979487 | 0.91453  | 0.664004 |
| 49 | 0.589744 | 0.979487 | 0.91453  | 0.664004 |
| 50 | 0.589744 | 0.969231 | 0.905983 | 0.632216 |
| 51 | 0.589744 | 0.974359 | 0.910256 | 0.647732 |
| 52 | 0.589744 | 0.969231 | 0.905983 | 0.632216 |
| 53 | 0.589744 | 0.974359 | 0.910256 | 0.647732 |
| 54 | 0.589744 | 0.969231 | 0.905983 | 0.632216 |
| 55 | 0.589744 | 0.969231 | 0.905983 | 0.632216 |
| 56 | 0.564103 | 0.969231 | 0.901709 | 0.612401 |
| 57 | 0.564103 | 0.974359 | 0.905983 | 0.628112 |
| 58 | 0.564103 | 0.969231 | 0.901709 | 0.612401 |
| 59 | 0.589744 | 0.969231 | 0.905983 | 0.632216 |
| 60 | 0.564103 | 0.969231 | 0.901709 | 0.612401 |
| 61 | 0.564103 | 0.969231 | 0.901709 | 0.612401 |
| 62 | 0.564103 | 0.974359 | 0.905983 | 0.628112 |
| 63 | 0.564103 | 0.969231 | 0.901709 | 0.612401 |
| 64 | 0.589744 | 0.964103 | 0.901709 | 0.617395 |
| 65 | 0.589744 | 0.964103 | 0.901709 | 0.617395 |
| 66 | 0.589744 | 0.964103 | 0.901709 | 0.617395 |
| 67 | 0.589744 | 0.964103 | 0.901709 | 0.617395 |
| 68 | 0.589744 | 0.964103 | 0.901709 | 0.617395 |
| 69 | 0.589744 | 0.958974 | 0.897436 | 0.603212 |
| 70 | 0.589744 | 0.953846 | 0.893162 | 0.589617 |
| 71 | 0.589744 | 0.953846 | 0.893162 | 0.589617 |
| 72 | 0.589744 | 0.953846 | 0.893162 | 0.589617 |
| 73 | 0.589744 | 0.953846 | 0.893162 | 0.589617 |
| 74 | 0.589744 | 0.958974 | 0.897436 | 0.603212 |
| 75 | 0.589744 | 0.953846 | 0.893162 | 0.589617 |
| 76 | 0.589744 | 0.953846 | 0.893162 | 0.589617 |
| 77 | 0.615385 | 0.953846 | 0.897436 | 0.609513 |
| 78 | 0.615385 | 0.953846 | 0.897436 | 0.609513 |
| 79 | 0.589744 | 0.953846 | 0.893162 | 0.589617 |
| 80 | 0.615385 | 0.948718 | 0.893162 | 0.596559 |
| 81 | 0.589744 | 0.948718 | 0.888889 | 0.576566 |
| 82 | 0.564103 | 0.948718 | 0.884615 | 0.556243 |
| 83 | 0.564103 | 0.953846 | 0.888889 | 0.569387 |

|     |          |          |          |          |
|-----|----------|----------|----------|----------|
| 84  | 0.589744 | 0.958974 | 0.897436 | 0.603212 |
| 85  | 0.589744 | 0.953846 | 0.893162 | 0.589617 |
| 86  | 0.589744 | 0.948718 | 0.888889 | 0.576566 |
| 87  | 0.589744 | 0.948718 | 0.888889 | 0.576566 |
| 88  | 0.615385 | 0.948718 | 0.893162 | 0.596559 |
| 89  | 0.589744 | 0.948718 | 0.888889 | 0.576566 |
| 90  | 0.589744 | 0.948718 | 0.888889 | 0.576566 |
| 91  | 0.564103 | 0.948718 | 0.884615 | 0.556243 |
| 92  | 0.564103 | 0.948718 | 0.884615 | 0.556243 |
| 93  | 0.564103 | 0.948718 | 0.884615 | 0.556243 |
| 94  | 0.564103 | 0.94359  | 0.880342 | 0.54362  |
| 95  | 0.564103 | 0.94359  | 0.880342 | 0.54362  |
| 96  | 0.589744 | 0.953846 | 0.893162 | 0.589617 |
| 97  | 0.589744 | 0.953846 | 0.893162 | 0.589617 |
| 98  | 0.589744 | 0.948718 | 0.888889 | 0.576566 |
| 99  | 0.589744 | 0.953846 | 0.893162 | 0.589617 |
| 100 | 0.589744 | 0.953846 | 0.893162 | 0.589617 |
| 101 | 0.589744 | 0.953846 | 0.893162 | 0.589617 |
| 102 | 0.589744 | 0.953846 | 0.893162 | 0.589617 |
| 103 | 0.641026 | 0.964103 | 0.910256 | 0.656366 |
| 104 | 0.641026 | 0.964103 | 0.910256 | 0.656366 |
| 105 | 0.641026 | 0.964103 | 0.910256 | 0.656366 |
| 106 | 0.641026 | 0.964103 | 0.910256 | 0.656366 |
| 107 | 0.615385 | 0.964103 | 0.905983 | 0.637037 |
| 108 | 0.615385 | 0.964103 | 0.905983 | 0.637037 |
| 109 | 0.615385 | 0.964103 | 0.905983 | 0.637037 |
| 110 | 0.615385 | 0.964103 | 0.905983 | 0.637037 |
| 111 | 0.615385 | 0.964103 | 0.905983 | 0.637037 |
| 112 | 0.615385 | 0.964103 | 0.905983 | 0.637037 |
| 113 | 0.615385 | 0.964103 | 0.905983 | 0.637037 |
| 114 | 0.615385 | 0.969231 | 0.910256 | 0.651695 |
| 115 | 0.615385 | 0.964103 | 0.905983 | 0.637037 |
| 116 | 0.615385 | 0.964103 | 0.905983 | 0.637037 |
| 117 | 0.615385 | 0.969231 | 0.910256 | 0.651695 |
| 118 | 0.615385 | 0.969231 | 0.910256 | 0.651695 |
| 119 | 0.615385 | 0.969231 | 0.910256 | 0.651695 |
| 120 | 0.615385 | 0.969231 | 0.910256 | 0.651695 |
| 121 | 0.615385 | 0.969231 | 0.910256 | 0.651695 |
| 122 | 0.615385 | 0.969231 | 0.910256 | 0.651695 |
| 123 | 0.615385 | 0.969231 | 0.910256 | 0.651695 |
| 124 | 0.615385 | 0.969231 | 0.910256 | 0.651695 |
| 125 | 0.615385 | 0.958974 | 0.901709 | 0.622992 |
| 126 | 0.615385 | 0.958974 | 0.901709 | 0.622992 |

|     |          |          |          |          |
|-----|----------|----------|----------|----------|
| 127 | 0.615385 | 0.958974 | 0.901709 | 0.622992 |
| 128 | 0.615385 | 0.958974 | 0.901709 | 0.622992 |
| 129 | 0.615385 | 0.958974 | 0.901709 | 0.622992 |
| 130 | 0.615385 | 0.958974 | 0.901709 | 0.622992 |
| 131 | 0.641026 | 0.958974 | 0.905983 | 0.64246  |
| 132 | 0.641026 | 0.964103 | 0.910256 | 0.656366 |
| 133 | 0.615385 | 0.958974 | 0.901709 | 0.622992 |
| 134 | 0.641026 | 0.953846 | 0.901709 | 0.629098 |
| 135 | 0.641026 | 0.953846 | 0.901709 | 0.629098 |
| 136 | 0.666667 | 0.969231 | 0.918803 | 0.689741 |
| 137 | 0.615385 | 0.969231 | 0.910256 | 0.651695 |
| 138 | 0.615385 | 0.964103 | 0.905983 | 0.637037 |
| 139 | 0.692308 | 0.964103 | 0.918803 | 0.694177 |
| 140 | 0.692308 | 0.964103 | 0.918803 | 0.694177 |
| 141 | 0.641026 | 0.964103 | 0.910256 | 0.656366 |
| 142 | 0.641026 | 0.964103 | 0.910256 | 0.656366 |
| 143 | 0.641026 | 0.964103 | 0.910256 | 0.656366 |
| 144 | 0.641026 | 0.958974 | 0.905983 | 0.64246  |
| 145 | 0.641026 | 0.958974 | 0.905983 | 0.64246  |
| 146 | 0.615385 | 0.958974 | 0.901709 | 0.622992 |
| 147 | 0.615385 | 0.958974 | 0.901709 | 0.622992 |
| 148 | 0.641026 | 0.958974 | 0.905983 | 0.64246  |
| 149 | 0.641026 | 0.964103 | 0.910256 | 0.656366 |
| 150 | 0.641026 | 0.953846 | 0.901709 | 0.629098 |
| 151 | 0.641026 | 0.958974 | 0.905983 | 0.64246  |
| 152 | 0.641026 | 0.964103 | 0.910256 | 0.656366 |
| 153 | 0.641026 | 0.958974 | 0.905983 | 0.64246  |
| 154 | 0.641026 | 0.958974 | 0.905983 | 0.64246  |
| 155 | 0.641026 | 0.958974 | 0.905983 | 0.64246  |
| 156 | 0.641026 | 0.958974 | 0.905983 | 0.64246  |
| 157 | 0.641026 | 0.953846 | 0.901709 | 0.629098 |
| 158 | 0.641026 | 0.958974 | 0.905983 | 0.64246  |
| 159 | 0.641026 | 0.958974 | 0.905983 | 0.64246  |
| 160 | 0.641026 | 0.953846 | 0.901709 | 0.629098 |
| 161 | 0.615385 | 0.953846 | 0.897436 | 0.609513 |
| 162 | 0.615385 | 0.953846 | 0.897436 | 0.609513 |
| 163 | 0.615385 | 0.958974 | 0.901709 | 0.622992 |
| 164 | 0.615385 | 0.958974 | 0.901709 | 0.622992 |
| 165 | 0.615385 | 0.958974 | 0.901709 | 0.622992 |
| 166 | 0.589744 | 0.964103 | 0.901709 | 0.617395 |
| 167 | 0.589744 | 0.964103 | 0.901709 | 0.617395 |
| 168 | 0.589744 | 0.964103 | 0.901709 | 0.617395 |
| 169 | 0.589744 | 0.958974 | 0.897436 | 0.603212 |

|     |          |          |          |          |
|-----|----------|----------|----------|----------|
| 170 | 0.615385 | 0.964103 | 0.905983 | 0.637037 |
| 171 | 0.589744 | 0.964103 | 0.901709 | 0.617395 |
| 172 | 0.589744 | 0.969231 | 0.905983 | 0.632216 |
| 173 | 0.589744 | 0.958974 | 0.897436 | 0.603212 |
| 174 | 0.615385 | 0.953846 | 0.897436 | 0.609513 |
| 175 | 0.615385 | 0.953846 | 0.897436 | 0.609513 |
| 176 | 0.615385 | 0.953846 | 0.897436 | 0.609513 |
| 177 | 0.615385 | 0.953846 | 0.897436 | 0.609513 |
| 178 | 0.589744 | 0.948718 | 0.888889 | 0.576566 |
| 179 | 0.641026 | 0.948718 | 0.897436 | 0.616243 |
| 180 | 0.615385 | 0.948718 | 0.893162 | 0.596559 |
| 181 | 0.641026 | 0.948718 | 0.897436 | 0.616243 |
| 182 | 0.641026 | 0.948718 | 0.897436 | 0.616243 |
| 183 | 0.641026 | 0.948718 | 0.897436 | 0.616243 |
| 184 | 0.666667 | 0.948718 | 0.901709 | 0.635642 |
| 185 | 0.666667 | 0.948718 | 0.901709 | 0.635642 |
| 186 | 0.641026 | 0.94359  | 0.893162 | 0.60386  |
| 187 | 0.666667 | 0.94359  | 0.897436 | 0.623344 |
| 188 | 0.641026 | 0.94359  | 0.893162 | 0.60386  |
| 189 | 0.641026 | 0.94359  | 0.893162 | 0.60386  |
| 190 | 0.666667 | 0.953846 | 0.905983 | 0.648395 |
| 191 | 0.641026 | 0.953846 | 0.901709 | 0.629098 |
| 192 | 0.641026 | 0.953846 | 0.901709 | 0.629098 |
| 193 | 0.615385 | 0.953846 | 0.897436 | 0.609513 |
| 194 | 0.615385 | 0.953846 | 0.897436 | 0.609513 |
| 195 | 0.615385 | 0.958974 | 0.901709 | 0.622992 |
| 196 | 0.615385 | 0.958974 | 0.901709 | 0.622992 |
| 197 | 0.615385 | 0.958974 | 0.901709 | 0.622992 |
| 198 | 0.615385 | 0.958974 | 0.901709 | 0.622992 |
| 199 | 0.615385 | 0.958974 | 0.901709 | 0.622992 |
| 200 | 0.615385 | 0.958974 | 0.901709 | 0.622992 |
| 201 | 0.641026 | 0.958974 | 0.905983 | 0.64246  |
| 202 | 0.615385 | 0.958974 | 0.901709 | 0.622992 |
| 203 | 0.615385 | 0.958974 | 0.901709 | 0.622992 |
| 204 | 0.615385 | 0.958974 | 0.901709 | 0.622992 |
| 205 | 0.615385 | 0.958974 | 0.901709 | 0.622992 |
| 206 | 0.615385 | 0.958974 | 0.901709 | 0.622992 |
| 207 | 0.589744 | 0.953846 | 0.893162 | 0.589617 |
| 208 | 0.589744 | 0.958974 | 0.897436 | 0.603212 |
| 209 | 0.589744 | 0.948718 | 0.888889 | 0.576566 |
| 210 | 0.589744 | 0.948718 | 0.888889 | 0.576566 |
| 211 | 0.589744 | 0.948718 | 0.888889 | 0.576566 |
| 212 | 0.589744 | 0.953846 | 0.893162 | 0.589617 |

|     |          |          |          |          |
|-----|----------|----------|----------|----------|
| 213 | 0.589744 | 0.958974 | 0.897436 | 0.603212 |
| 214 | 0.589744 | 0.953846 | 0.893162 | 0.589617 |
| 215 | 0.589744 | 0.958974 | 0.897436 | 0.603212 |
| 216 | 0.615385 | 0.964103 | 0.905983 | 0.637037 |
| 217 | 0.615385 | 0.958974 | 0.901709 | 0.622992 |
| 218 | 0.615385 | 0.958974 | 0.901709 | 0.622992 |
| 219 | 0.615385 | 0.958974 | 0.901709 | 0.622992 |
| 220 | 0.615385 | 0.958974 | 0.901709 | 0.622992 |
| 221 | 0.641026 | 0.958974 | 0.905983 | 0.64246  |
| 222 | 0.666667 | 0.958974 | 0.910256 | 0.661638 |
| 223 | 0.641026 | 0.958974 | 0.905983 | 0.64246  |
| 224 | 0.666667 | 0.953846 | 0.905983 | 0.648395 |
| 225 | 0.666667 | 0.953846 | 0.905983 | 0.648395 |
| 226 | 0.666667 | 0.953846 | 0.905983 | 0.648395 |
| 227 | 0.666667 | 0.953846 | 0.905983 | 0.648395 |
| 228 | 0.666667 | 0.958974 | 0.910256 | 0.661638 |
| 229 | 0.666667 | 0.958974 | 0.910256 | 0.661638 |
| 230 | 0.666667 | 0.953846 | 0.905983 | 0.648395 |
| 231 | 0.666667 | 0.958974 | 0.910256 | 0.661638 |
| 232 | 0.666667 | 0.958974 | 0.910256 | 0.661638 |
| 233 | 0.666667 | 0.958974 | 0.910256 | 0.661638 |
| 234 | 0.666667 | 0.958974 | 0.910256 | 0.661638 |
| 235 | 0.666667 | 0.958974 | 0.910256 | 0.661638 |
| 236 | 0.666667 | 0.958974 | 0.910256 | 0.661638 |
| 237 | 0.692308 | 0.958974 | 0.91453  | 0.680547 |
| 238 | 0.692308 | 0.953846 | 0.910256 | 0.667424 |
| 239 | 0.692308 | 0.958974 | 0.91453  | 0.680547 |
| 240 | 0.692308 | 0.958974 | 0.91453  | 0.680547 |
| 241 | 0.692308 | 0.958974 | 0.91453  | 0.680547 |
| 242 | 0.692308 | 0.958974 | 0.91453  | 0.680547 |
| 243 | 0.666667 | 0.958974 | 0.910256 | 0.661638 |
| 244 | 0.666667 | 0.958974 | 0.910256 | 0.661638 |
| 245 | 0.666667 | 0.958974 | 0.910256 | 0.661638 |
| 246 | 0.666667 | 0.958974 | 0.910256 | 0.661638 |
| 247 | 0.666667 | 0.958974 | 0.910256 | 0.661638 |
| 248 | 0.692308 | 0.958974 | 0.91453  | 0.680547 |
| 249 | 0.692308 | 0.958974 | 0.91453  | 0.680547 |
| 250 | 0.692308 | 0.958974 | 0.91453  | 0.680547 |
| 251 | 0.692308 | 0.958974 | 0.91453  | 0.680547 |
| 252 | 0.692308 | 0.953846 | 0.910256 | 0.667424 |
| 253 | 0.692308 | 0.953846 | 0.910256 | 0.667424 |
| 254 | 0.692308 | 0.953846 | 0.910256 | 0.667424 |
| 255 | 0.692308 | 0.958974 | 0.91453  | 0.680547 |

|     |          |          |          |          |
|-----|----------|----------|----------|----------|
| 256 | 0.692308 | 0.958974 | 0.91453  | 0.680547 |
| 257 | 0.692308 | 0.953846 | 0.910256 | 0.667424 |
| 258 | 0.692308 | 0.953846 | 0.910256 | 0.667424 |
| 259 | 0.692308 | 0.953846 | 0.910256 | 0.667424 |
| 260 | 0.692308 | 0.958974 | 0.91453  | 0.680547 |
| 261 | 0.692308 | 0.958974 | 0.91453  | 0.680547 |
| 262 | 0.692308 | 0.958974 | 0.91453  | 0.680547 |
| 263 | 0.692308 | 0.958974 | 0.91453  | 0.680547 |
| 264 | 0.692308 | 0.958974 | 0.91453  | 0.680547 |
| 265 | 0.692308 | 0.958974 | 0.91453  | 0.680547 |
| 266 | 0.692308 | 0.958974 | 0.91453  | 0.680547 |
| 267 | 0.692308 | 0.958974 | 0.91453  | 0.680547 |
| 268 | 0.692308 | 0.958974 | 0.91453  | 0.680547 |
| 269 | 0.692308 | 0.958974 | 0.91453  | 0.680547 |
| 270 | 0.692308 | 0.958974 | 0.91453  | 0.680547 |
| 271 | 0.692308 | 0.958974 | 0.91453  | 0.680547 |
| 272 | 0.666667 | 0.958974 | 0.910256 | 0.661638 |
| 273 | 0.666667 | 0.958974 | 0.910256 | 0.661638 |
| 274 | 0.666667 | 0.964103 | 0.91453  | 0.675406 |
| 275 | 0.666667 | 0.964103 | 0.91453  | 0.675406 |
| 276 | 0.666667 | 0.964103 | 0.91453  | 0.675406 |
| 277 | 0.666667 | 0.964103 | 0.91453  | 0.675406 |
| 278 | 0.666667 | 0.964103 | 0.91453  | 0.675406 |
| 279 | 0.666667 | 0.964103 | 0.91453  | 0.675406 |
| 280 | 0.666667 | 0.964103 | 0.91453  | 0.675406 |
| 281 | 0.666667 | 0.964103 | 0.91453  | 0.675406 |
| 282 | 0.666667 | 0.964103 | 0.91453  | 0.675406 |
| 283 | 0.666667 | 0.964103 | 0.91453  | 0.675406 |
| 284 | 0.666667 | 0.964103 | 0.91453  | 0.675406 |
| 285 | 0.666667 | 0.964103 | 0.91453  | 0.675406 |
| 286 | 0.666667 | 0.964103 | 0.91453  | 0.675406 |
| 287 | 0.666667 | 0.964103 | 0.91453  | 0.675406 |
| 288 | 0.666667 | 0.964103 | 0.91453  | 0.675406 |
| 289 | 0.666667 | 0.964103 | 0.91453  | 0.675406 |
| 290 | 0.666667 | 0.964103 | 0.91453  | 0.675406 |
| 291 | 0.666667 | 0.964103 | 0.91453  | 0.675406 |
| 292 | 0.666667 | 0.964103 | 0.91453  | 0.675406 |
| 293 | 0.666667 | 0.964103 | 0.91453  | 0.675406 |
| 294 | 0.666667 | 0.964103 | 0.91453  | 0.675406 |
| 295 | 0.666667 | 0.964103 | 0.91453  | 0.675406 |
| 296 | 0.666667 | 0.964103 | 0.91453  | 0.675406 |
| 297 | 0.666667 | 0.964103 | 0.91453  | 0.675406 |
| 298 | 0.666667 | 0.964103 | 0.91453  | 0.675406 |

|     |          |          |          |          |
|-----|----------|----------|----------|----------|
| 299 | 0.666667 | 0.964103 | 0.91453  | 0.675406 |
| 300 | 0.666667 | 0.964103 | 0.91453  | 0.675406 |
| 301 | 0.666667 | 0.964103 | 0.91453  | 0.675406 |
| 302 | 0.666667 | 0.964103 | 0.91453  | 0.675406 |
| 303 | 0.666667 | 0.964103 | 0.91453  | 0.675406 |
| 304 | 0.692308 | 0.964103 | 0.918803 | 0.694177 |
| 305 | 0.666667 | 0.964103 | 0.91453  | 0.675406 |
| 306 | 0.666667 | 0.964103 | 0.91453  | 0.675406 |
| 307 | 0.666667 | 0.964103 | 0.91453  | 0.675406 |
| 308 | 0.666667 | 0.964103 | 0.91453  | 0.675406 |
| 309 | 0.692308 | 0.964103 | 0.918803 | 0.694177 |
| 310 | 0.692308 | 0.964103 | 0.918803 | 0.694177 |
| 311 | 0.666667 | 0.964103 | 0.91453  | 0.675406 |
| 312 | 0.666667 | 0.964103 | 0.91453  | 0.675406 |
| 313 | 0.666667 | 0.964103 | 0.91453  | 0.675406 |
| 314 | 0.666667 | 0.964103 | 0.91453  | 0.675406 |
| 315 | 0.666667 | 0.964103 | 0.91453  | 0.675406 |
| 316 | 0.666667 | 0.964103 | 0.91453  | 0.675406 |
| 317 | 0.666667 | 0.964103 | 0.91453  | 0.675406 |
| 318 | 0.666667 | 0.964103 | 0.91453  | 0.675406 |
| 319 | 0.666667 | 0.964103 | 0.91453  | 0.675406 |
| 320 | 0.666667 | 0.964103 | 0.91453  | 0.675406 |
| 321 | 0.666667 | 0.964103 | 0.91453  | 0.675406 |
| 322 | 0.666667 | 0.964103 | 0.91453  | 0.675406 |
| 323 | 0.666667 | 0.964103 | 0.91453  | 0.675406 |
| 324 | 0.666667 | 0.964103 | 0.91453  | 0.675406 |
| 325 | 0.641026 | 0.958974 | 0.905983 | 0.64246  |
| 326 | 0.641026 | 0.958974 | 0.905983 | 0.64246  |
| 327 | 0.641026 | 0.964103 | 0.910256 | 0.656366 |
| 328 | 0.641026 | 0.958974 | 0.905983 | 0.64246  |
| 329 | 0.641026 | 0.958974 | 0.905983 | 0.64246  |
| 330 | 0.666667 | 0.964103 | 0.91453  | 0.675406 |
| 331 | 0.666667 | 0.964103 | 0.91453  | 0.675406 |
| 332 | 0.692308 | 0.964103 | 0.918803 | 0.694177 |
| 333 | 0.692308 | 0.958974 | 0.91453  | 0.680547 |
| 334 | 0.692308 | 0.953846 | 0.910256 | 0.667424 |
| 335 | 0.666667 | 0.958974 | 0.910256 | 0.661638 |
| 336 | 0.692308 | 0.964103 | 0.918803 | 0.694177 |
| 337 | 0.692308 | 0.964103 | 0.918803 | 0.694177 |
| 338 | 0.692308 | 0.964103 | 0.918803 | 0.694177 |
| 339 | 0.692308 | 0.964103 | 0.918803 | 0.694177 |
| 340 | 0.692308 | 0.964103 | 0.918803 | 0.694177 |
| 341 | 0.666667 | 0.964103 | 0.91453  | 0.675406 |



|     |          |          |          |          |
|-----|----------|----------|----------|----------|
| 342 | 0.666667 | 0.964103 | 0.91453  | 0.675406 |
| 343 | 0.692308 | 0.964103 | 0.918803 | 0.694177 |
| 344 | 0.717949 | 0.964103 | 0.923077 | 0.712699 |
| 345 | 0.717949 | 0.964103 | 0.923077 | 0.712699 |
| 346 | 0.717949 | 0.964103 | 0.923077 | 0.712699 |
| 347 | 0.717949 | 0.964103 | 0.923077 | 0.712699 |
| 348 | 0.717949 | 0.964103 | 0.923077 | 0.712699 |
| 349 | 0.717949 | 0.964103 | 0.923077 | 0.712699 |
| 350 | 0.717949 | 0.964103 | 0.923077 | 0.712699 |
| 351 | 0.717949 | 0.964103 | 0.923077 | 0.712699 |
| 352 | 0.692308 | 0.958974 | 0.91453  | 0.680547 |
| 353 | 0.717949 | 0.958974 | 0.918803 | 0.699206 |
| 354 | 0.692308 | 0.958974 | 0.91453  | 0.680547 |
| 355 | 0.692308 | 0.958974 | 0.91453  | 0.680547 |
| 356 | 0.692308 | 0.964103 | 0.918803 | 0.694177 |
| 357 | 0.692308 | 0.964103 | 0.918803 | 0.694177 |
| 358 | 0.692308 | 0.964103 | 0.918803 | 0.694177 |
| 359 | 0.692308 | 0.958974 | 0.91453  | 0.680547 |
| 360 | 0.692308 | 0.958974 | 0.91453  | 0.680547 |
| 361 | 0.692308 | 0.958974 | 0.91453  | 0.680547 |
| 362 | 0.692308 | 0.958974 | 0.91453  | 0.680547 |
| 363 | 0.692308 | 0.958974 | 0.91453  | 0.680547 |
| 364 | 0.692308 | 0.958974 | 0.91453  | 0.680547 |
| 365 | 0.692308 | 0.958974 | 0.91453  | 0.680547 |
| 366 | 0.692308 | 0.958974 | 0.91453  | 0.680547 |
| 367 | 0.692308 | 0.958974 | 0.91453  | 0.680547 |
| 368 | 0.692308 | 0.958974 | 0.91453  | 0.680547 |
| 369 | 0.692308 | 0.958974 | 0.91453  | 0.680547 |
| 370 | 0.692308 | 0.958974 | 0.91453  | 0.680547 |
| 371 | 0.692308 | 0.958974 | 0.91453  | 0.680547 |
| 372 | 0.717949 | 0.958974 | 0.918803 | 0.699206 |
| 373 | 0.717949 | 0.958974 | 0.918803 | 0.699206 |
| 374 | 0.717949 | 0.958974 | 0.918803 | 0.699206 |
| 375 | 0.717949 | 0.958974 | 0.918803 | 0.699206 |
| 376 | 0.717949 | 0.964103 | 0.923077 | 0.712699 |
| 377 | 0.717949 | 0.964103 | 0.923077 | 0.712699 |
| 378 | 0.717949 | 0.958974 | 0.918803 | 0.699206 |
| 379 | 0.717949 | 0.958974 | 0.918803 | 0.699206 |
| 380 | 0.692308 | 0.953846 | 0.910256 | 0.667424 |
| 381 | 0.717949 | 0.953846 | 0.91453  | 0.686203 |
| 382 | 0.717949 | 0.958974 | 0.918803 | 0.699206 |
| 383 | 0.717949 | 0.958974 | 0.918803 | 0.699206 |
| 384 | 0.717949 | 0.958974 | 0.918803 | 0.699206 |

|     |          |          |          |          |
|-----|----------|----------|----------|----------|
| 385 | 0.717949 | 0.958974 | 0.918803 | 0.699206 |
| 386 | 0.717949 | 0.958974 | 0.918803 | 0.699206 |
| 387 | 0.692308 | 0.958974 | 0.91453  | 0.680547 |
| 388 | 0.692308 | 0.958974 | 0.91453  | 0.680547 |
| 389 | 0.717949 | 0.953846 | 0.91453  | 0.686203 |
| 390 | 0.692308 | 0.953846 | 0.910256 | 0.667424 |
| 391 | 0.692308 | 0.953846 | 0.910256 | 0.667424 |
| 392 | 0.692308 | 0.953846 | 0.910256 | 0.667424 |
| 393 | 0.692308 | 0.953846 | 0.910256 | 0.667424 |
| 394 | 0.692308 | 0.964103 | 0.918803 | 0.694177 |
| 395 | 0.692308 | 0.964103 | 0.918803 | 0.694177 |
| 396 | 0.692308 | 0.964103 | 0.918803 | 0.694177 |
| 397 | 0.692308 | 0.964103 | 0.918803 | 0.694177 |
| 398 | 0.692308 | 0.958974 | 0.91453  | 0.680547 |
| 399 | 0.692308 | 0.958974 | 0.91453  | 0.680547 |
| 400 | 0.692308 | 0.958974 | 0.91453  | 0.680547 |
| 401 | 0.692308 | 0.953846 | 0.910256 | 0.667424 |
| 402 | 0.692308 | 0.948718 | 0.905983 | 0.654773 |
| 403 | 0.692308 | 0.948718 | 0.905983 | 0.654773 |
| 404 | 0.692308 | 0.958974 | 0.91453  | 0.680547 |
| 405 | 0.692308 | 0.958974 | 0.91453  | 0.680547 |
| 406 | 0.692308 | 0.958974 | 0.91453  | 0.680547 |
| 407 | 0.692308 | 0.953846 | 0.910256 | 0.667424 |
| 408 | 0.692308 | 0.953846 | 0.910256 | 0.667424 |
| 409 | 0.692308 | 0.948718 | 0.905983 | 0.654773 |
| 410 | 0.692308 | 0.948718 | 0.905983 | 0.654773 |
| 411 | 0.692308 | 0.948718 | 0.905983 | 0.654773 |
| 412 | 0.692308 | 0.953846 | 0.910256 | 0.667424 |
| 413 | 0.692308 | 0.948718 | 0.905983 | 0.654773 |
| 414 | 0.692308 | 0.948718 | 0.905983 | 0.654773 |
| 415 | 0.692308 | 0.948718 | 0.905983 | 0.654773 |
| 416 | 0.692308 | 0.948718 | 0.905983 | 0.654773 |
| 417 | 0.692308 | 0.948718 | 0.905983 | 0.654773 |
| 418 | 0.692308 | 0.953846 | 0.910256 | 0.667424 |
| 419 | 0.692308 | 0.953846 | 0.910256 | 0.667424 |
| 420 | 0.692308 | 0.953846 | 0.910256 | 0.667424 |
| 421 | 0.692308 | 0.948718 | 0.905983 | 0.654773 |
| 422 | 0.692308 | 0.953846 | 0.910256 | 0.667424 |
| 423 | 0.692308 | 0.953846 | 0.910256 | 0.667424 |
| 424 | 0.692308 | 0.953846 | 0.910256 | 0.667424 |
| 425 | 0.692308 | 0.953846 | 0.910256 | 0.667424 |
| 426 | 0.692308 | 0.953846 | 0.910256 | 0.667424 |
| 427 | 0.692308 | 0.953846 | 0.910256 | 0.667424 |

|     |          |          |          |          |
|-----|----------|----------|----------|----------|
| 428 | 0.692308 | 0.953846 | 0.910256 | 0.667424 |
| 429 | 0.692308 | 0.953846 | 0.910256 | 0.667424 |
| 430 | 0.692308 | 0.953846 | 0.910256 | 0.667424 |
| 431 | 0.692308 | 0.953846 | 0.910256 | 0.667424 |
| 432 | 0.692308 | 0.953846 | 0.910256 | 0.667424 |
| 433 | 0.692308 | 0.948718 | 0.905983 | 0.654773 |
| 434 | 0.692308 | 0.948718 | 0.905983 | 0.654773 |
| 435 | 0.692308 | 0.948718 | 0.905983 | 0.654773 |
| 436 | 0.692308 | 0.948718 | 0.905983 | 0.654773 |
| 437 | 0.692308 | 0.953846 | 0.910256 | 0.667424 |
| 438 | 0.692308 | 0.953846 | 0.910256 | 0.667424 |
| 439 | 0.692308 | 0.948718 | 0.905983 | 0.654773 |
| 440 | 0.666667 | 0.948718 | 0.901709 | 0.635642 |
| 441 | 0.666667 | 0.948718 | 0.901709 | 0.635642 |
| 442 | 0.666667 | 0.948718 | 0.901709 | 0.635642 |
| 443 | 0.666667 | 0.948718 | 0.901709 | 0.635642 |
| 444 | 0.666667 | 0.948718 | 0.901709 | 0.635642 |
| 445 | 0.666667 | 0.948718 | 0.901709 | 0.635642 |
| 446 | 0.666667 | 0.948718 | 0.901709 | 0.635642 |
| 447 | 0.666667 | 0.948718 | 0.901709 | 0.635642 |
| 448 | 0.666667 | 0.948718 | 0.901709 | 0.635642 |
| 449 | 0.692308 | 0.948718 | 0.905983 | 0.654773 |
| 450 | 0.692308 | 0.948718 | 0.905983 | 0.654773 |
| 451 | 0.692308 | 0.948718 | 0.905983 | 0.654773 |
| 452 | 0.692308 | 0.948718 | 0.905983 | 0.654773 |
| 453 | 0.692308 | 0.948718 | 0.905983 | 0.654773 |
| 454 | 0.692308 | 0.948718 | 0.905983 | 0.654773 |
| 455 | 0.692308 | 0.948718 | 0.905983 | 0.654773 |
| 456 | 0.692308 | 0.948718 | 0.905983 | 0.654773 |
| 457 | 0.692308 | 0.948718 | 0.905983 | 0.654773 |
| 458 | 0.692308 | 0.948718 | 0.905983 | 0.654773 |
| 459 | 0.692308 | 0.948718 | 0.905983 | 0.654773 |
| 460 | 0.692308 | 0.948718 | 0.905983 | 0.654773 |
| 461 | 0.692308 | 0.94359  | 0.901709 | 0.642565 |
| 462 | 0.692308 | 0.94359  | 0.901709 | 0.642565 |
| 463 | 0.692308 | 0.94359  | 0.901709 | 0.642565 |
| 464 | 0.692308 | 0.94359  | 0.901709 | 0.642565 |
| 465 | 0.692308 | 0.94359  | 0.901709 | 0.642565 |
| 466 | 0.692308 | 0.94359  | 0.901709 | 0.642565 |
| 467 | 0.692308 | 0.938462 | 0.897436 | 0.630769 |
| 468 | 0.717949 | 0.938462 | 0.901709 | 0.649822 |
| 469 | 0.717949 | 0.938462 | 0.901709 | 0.649822 |
| 470 | 0.717949 | 0.938462 | 0.901709 | 0.649822 |

|     |          |          |          |          |
|-----|----------|----------|----------|----------|
| 471 | 0.717949 | 0.938462 | 0.901709 | 0.649822 |
| 472 | 0.717949 | 0.938462 | 0.901709 | 0.649822 |
| 473 | 0.717949 | 0.938462 | 0.901709 | 0.649822 |
| 474 | 0.717949 | 0.938462 | 0.901709 | 0.649822 |
| 475 | 0.717949 | 0.938462 | 0.901709 | 0.649822 |
| 476 | 0.717949 | 0.938462 | 0.901709 | 0.649822 |
| 477 | 0.717949 | 0.938462 | 0.901709 | 0.649822 |
| 478 | 0.717949 | 0.938462 | 0.901709 | 0.649822 |
| 479 | 0.717949 | 0.938462 | 0.901709 | 0.649822 |
| 480 | 0.717949 | 0.94359  | 0.905983 | 0.661538 |
| 481 | 0.717949 | 0.94359  | 0.905983 | 0.661538 |
| 482 | 0.717949 | 0.938462 | 0.901709 | 0.649822 |
| 483 | 0.717949 | 0.94359  | 0.905983 | 0.661538 |
| 484 | 0.717949 | 0.938462 | 0.901709 | 0.649822 |
| 485 | 0.717949 | 0.94359  | 0.905983 | 0.661538 |
| 486 | 0.717949 | 0.948718 | 0.910256 | 0.673657 |
| 487 | 0.717949 | 0.94359  | 0.905983 | 0.661538 |
| 488 | 0.717949 | 0.948718 | 0.910256 | 0.673657 |
| 489 | 0.717949 | 0.948718 | 0.910256 | 0.673657 |
| 490 | 0.717949 | 0.948718 | 0.910256 | 0.673657 |
| 491 | 0.717949 | 0.948718 | 0.910256 | 0.673657 |
| 492 | 0.717949 | 0.948718 | 0.910256 | 0.673657 |
| 493 | 0.717949 | 0.948718 | 0.910256 | 0.673657 |
| 494 | 0.717949 | 0.953846 | 0.91453  | 0.686203 |
| 495 | 0.717949 | 0.953846 | 0.91453  | 0.686203 |
| 496 | 0.717949 | 0.953846 | 0.91453  | 0.686203 |
| 497 | 0.717949 | 0.953846 | 0.91453  | 0.686203 |
| 498 | 0.717949 | 0.953846 | 0.91453  | 0.686203 |
| 499 | 0.717949 | 0.953846 | 0.91453  | 0.686203 |
| 500 | 0.717949 | 0.953846 | 0.91453  | 0.686203 |

(2) Dataset  $D_2$

| Number of features | SN       | SP       | ACC      | MCC      |
|--------------------|----------|----------|----------|----------|
| 4                  | 0.538462 | 0.969231 | 0.897436 | 0.59222  |
| 5                  | 0.435897 | 0.948718 | 0.863248 | 0.448652 |
| 6                  | 0.435897 | 0.953846 | 0.867521 | 0.462179 |
| 7                  | 0.435897 | 0.969231 | 0.880342 | 0.507151 |
| 8                  | 0.435897 | 0.974359 | 0.884615 | 0.523873 |
| 9                  | 0.410256 | 0.989744 | 0.893162 | 0.559431 |
| 10                 | 0.410256 | 0.989744 | 0.893162 | 0.559431 |
| 11                 | 0.461538 | 0.989744 | 0.901709 | 0.601556 |
| 12                 | 0.461538 | 0.989744 | 0.901709 | 0.601556 |

|    |          |          |          |          |
|----|----------|----------|----------|----------|
| 13 | 0.461538 | 0.989744 | 0.901709 | 0.601556 |
| 14 | 0.461538 | 0.989744 | 0.901709 | 0.601556 |
| 15 | 0.512821 | 0.989744 | 0.910256 | 0.641744 |
| 16 | 0.487179 | 0.989744 | 0.905983 | 0.621868 |
| 17 | 0.461538 | 0.989744 | 0.901709 | 0.601556 |
| 18 | 0.461538 | 0.989744 | 0.901709 | 0.601556 |
| 19 | 0.461538 | 0.984615 | 0.897436 | 0.581748 |
| 20 | 0.487179 | 0.984615 | 0.901709 | 0.602454 |
| 21 | 0.487179 | 0.989744 | 0.905983 | 0.621868 |
| 22 | 0.461538 | 0.989744 | 0.901709 | 0.601556 |
| 23 | 0.461538 | 0.989744 | 0.901709 | 0.601556 |
| 24 | 0.512821 | 0.989744 | 0.910256 | 0.641744 |
| 25 | 0.538462 | 0.984615 | 0.910256 | 0.64254  |
| 26 | 0.538462 | 0.989744 | 0.91453  | 0.661222 |
| 27 | 0.538462 | 0.989744 | 0.91453  | 0.661222 |
| 28 | 0.538462 | 0.989744 | 0.91453  | 0.661222 |
| 29 | 0.538462 | 0.989744 | 0.91453  | 0.661222 |
| 30 | 0.538462 | 0.989744 | 0.91453  | 0.661222 |
| 31 | 0.538462 | 0.989744 | 0.91453  | 0.661222 |
| 32 | 0.538462 | 0.989744 | 0.91453  | 0.661222 |
| 33 | 0.538462 | 0.984615 | 0.910256 | 0.64254  |
| 34 | 0.538462 | 0.984615 | 0.910256 | 0.64254  |
| 35 | 0.538462 | 0.984615 | 0.910256 | 0.64254  |
| 36 | 0.538462 | 0.984615 | 0.910256 | 0.64254  |
| 37 | 0.538462 | 0.984615 | 0.910256 | 0.64254  |
| 38 | 0.564103 | 0.984615 | 0.91453  | 0.661996 |
| 39 | 0.538462 | 0.984615 | 0.910256 | 0.64254  |
| 40 | 0.538462 | 0.984615 | 0.910256 | 0.64254  |
| 41 | 0.538462 | 0.979487 | 0.905983 | 0.624875 |
| 42 | 0.538462 | 0.979487 | 0.905983 | 0.624875 |
| 43 | 0.538462 | 0.979487 | 0.905983 | 0.624875 |
| 44 | 0.538462 | 0.979487 | 0.905983 | 0.624875 |
| 45 | 0.538462 | 0.979487 | 0.905983 | 0.624875 |
| 46 | 0.538462 | 0.979487 | 0.905983 | 0.624875 |
| 47 | 0.538462 | 0.979487 | 0.905983 | 0.624875 |
| 48 | 0.564103 | 0.979487 | 0.910256 | 0.644618 |
| 49 | 0.564103 | 0.979487 | 0.910256 | 0.644618 |
| 50 | 0.564103 | 0.979487 | 0.910256 | 0.644618 |
| 51 | 0.564103 | 0.979487 | 0.910256 | 0.644618 |
| 52 | 0.564103 | 0.979487 | 0.910256 | 0.644618 |
| 53 | 0.564103 | 0.979487 | 0.910256 | 0.644618 |
| 54 | 0.564103 | 0.979487 | 0.910256 | 0.644618 |
| 55 | 0.564103 | 0.979487 | 0.910256 | 0.644618 |

|    |          |          |          |          |
|----|----------|----------|----------|----------|
| 56 | 0.564103 | 0.974359 | 0.905983 | 0.628112 |
| 57 | 0.564103 | 0.974359 | 0.905983 | 0.628112 |
| 58 | 0.564103 | 0.974359 | 0.905983 | 0.628112 |
| 59 | 0.564103 | 0.974359 | 0.905983 | 0.628112 |
| 60 | 0.564103 | 0.974359 | 0.905983 | 0.628112 |
| 61 | 0.564103 | 0.974359 | 0.905983 | 0.628112 |
| 62 | 0.564103 | 0.969231 | 0.901709 | 0.612401 |
| 63 | 0.564103 | 0.974359 | 0.905983 | 0.628112 |
| 64 | 0.589744 | 0.974359 | 0.910256 | 0.647732 |
| 65 | 0.564103 | 0.974359 | 0.905983 | 0.628112 |
| 66 | 0.564103 | 0.979487 | 0.910256 | 0.644618 |
| 67 | 0.564103 | 0.974359 | 0.905983 | 0.628112 |
| 68 | 0.589744 | 0.974359 | 0.910256 | 0.647732 |
| 69 | 0.564103 | 0.974359 | 0.905983 | 0.628112 |
| 70 | 0.589744 | 0.969231 | 0.905983 | 0.632216 |
| 71 | 0.589744 | 0.974359 | 0.910256 | 0.647732 |
| 72 | 0.564103 | 0.969231 | 0.901709 | 0.612401 |
| 73 | 0.564103 | 0.969231 | 0.901709 | 0.612401 |
| 74 | 0.564103 | 0.969231 | 0.901709 | 0.612401 |
| 75 | 0.564103 | 0.969231 | 0.901709 | 0.612401 |
| 76 | 0.564103 | 0.974359 | 0.905983 | 0.628112 |
| 77 | 0.538462 | 0.969231 | 0.897436 | 0.59222  |
| 78 | 0.538462 | 0.958974 | 0.888889 | 0.562614 |
| 79 | 0.564103 | 0.953846 | 0.888889 | 0.569387 |
| 80 | 0.564103 | 0.953846 | 0.888889 | 0.569387 |
| 81 | 0.564103 | 0.958974 | 0.893162 | 0.583095 |
| 82 | 0.564103 | 0.958974 | 0.893162 | 0.583095 |
| 83 | 0.564103 | 0.958974 | 0.893162 | 0.583095 |
| 84 | 0.564103 | 0.958974 | 0.893162 | 0.583095 |
| 85 | 0.564103 | 0.953846 | 0.888889 | 0.569387 |
| 86 | 0.564103 | 0.948718 | 0.884615 | 0.556243 |
| 87 | 0.538462 | 0.969231 | 0.897436 | 0.59222  |
| 88 | 0.538462 | 0.969231 | 0.897436 | 0.59222  |
| 89 | 0.538462 | 0.974359 | 0.901709 | 0.60813  |
| 90 | 0.538462 | 0.969231 | 0.897436 | 0.59222  |
| 91 | 0.538462 | 0.969231 | 0.897436 | 0.59222  |
| 92 | 0.564103 | 0.969231 | 0.901709 | 0.612401 |
| 93 | 0.538462 | 0.969231 | 0.897436 | 0.59222  |
| 94 | 0.538462 | 0.969231 | 0.897436 | 0.59222  |
| 95 | 0.538462 | 0.969231 | 0.897436 | 0.59222  |
| 96 | 0.564103 | 0.969231 | 0.901709 | 0.612401 |
| 97 | 0.538462 | 0.969231 | 0.897436 | 0.59222  |
| 98 | 0.538462 | 0.953846 | 0.884615 | 0.548795 |

|     |          |          |          |          |
|-----|----------|----------|----------|----------|
| 99  | 0.538462 | 0.953846 | 0.884615 | 0.548795 |
| 100 | 0.538462 | 0.953846 | 0.884615 | 0.548795 |
| 101 | 0.538462 | 0.953846 | 0.884615 | 0.548795 |
| 102 | 0.538462 | 0.953846 | 0.884615 | 0.548795 |
| 103 | 0.538462 | 0.953846 | 0.884615 | 0.548795 |
| 104 | 0.538462 | 0.948718 | 0.880342 | 0.535562 |
| 105 | 0.564103 | 0.948718 | 0.884615 | 0.556243 |
| 106 | 0.692308 | 0.953846 | 0.910256 | 0.667424 |
| 107 | 0.692308 | 0.953846 | 0.910256 | 0.667424 |
| 108 | 0.692308 | 0.953846 | 0.910256 | 0.667424 |
| 109 | 0.692308 | 0.953846 | 0.910256 | 0.667424 |
| 110 | 0.692308 | 0.964103 | 0.918803 | 0.694177 |
| 111 | 0.692308 | 0.953846 | 0.910256 | 0.667424 |
| 112 | 0.692308 | 0.953846 | 0.910256 | 0.667424 |
| 113 | 0.692308 | 0.953846 | 0.910256 | 0.667424 |
| 114 | 0.692308 | 0.953846 | 0.910256 | 0.667424 |
| 115 | 0.692308 | 0.948718 | 0.905983 | 0.654773 |
| 116 | 0.692308 | 0.953846 | 0.910256 | 0.667424 |
| 117 | 0.692308 | 0.94359  | 0.901709 | 0.642565 |
| 118 | 0.666667 | 0.958974 | 0.910256 | 0.661638 |
| 119 | 0.641026 | 0.958974 | 0.905983 | 0.64246  |
| 120 | 0.641026 | 0.958974 | 0.905983 | 0.64246  |
| 121 | 0.641026 | 0.953846 | 0.901709 | 0.629098 |
| 122 | 0.641026 | 0.953846 | 0.901709 | 0.629098 |
| 123 | 0.666667 | 0.953846 | 0.905983 | 0.648395 |
| 124 | 0.666667 | 0.953846 | 0.905983 | 0.648395 |
| 125 | 0.666667 | 0.953846 | 0.905983 | 0.648395 |
| 126 | 0.666667 | 0.953846 | 0.905983 | 0.648395 |
| 127 | 0.641026 | 0.953846 | 0.901709 | 0.629098 |
| 128 | 0.641026 | 0.953846 | 0.901709 | 0.629098 |
| 129 | 0.641026 | 0.958974 | 0.905983 | 0.64246  |
| 130 | 0.641026 | 0.958974 | 0.905983 | 0.64246  |
| 131 | 0.641026 | 0.958974 | 0.905983 | 0.64246  |
| 132 | 0.641026 | 0.958974 | 0.905983 | 0.64246  |
| 133 | 0.641026 | 0.969231 | 0.91453  | 0.670862 |
| 134 | 0.641026 | 0.969231 | 0.91453  | 0.670862 |
| 135 | 0.641026 | 0.969231 | 0.91453  | 0.670862 |
| 136 | 0.641026 | 0.969231 | 0.91453  | 0.670862 |
| 137 | 0.615385 | 0.969231 | 0.910256 | 0.651695 |
| 138 | 0.615385 | 0.958974 | 0.901709 | 0.622992 |
| 139 | 0.615385 | 0.964103 | 0.905983 | 0.637037 |
| 140 | 0.615385 | 0.964103 | 0.905983 | 0.637037 |
| 141 | 0.615385 | 0.964103 | 0.905983 | 0.637037 |

|     |          |          |          |          |
|-----|----------|----------|----------|----------|
| 142 | 0.615385 | 0.964103 | 0.905983 | 0.637037 |
| 143 | 0.615385 | 0.964103 | 0.905983 | 0.637037 |
| 144 | 0.615385 | 0.958974 | 0.901709 | 0.622992 |
| 145 | 0.615385 | 0.958974 | 0.901709 | 0.622992 |
| 146 | 0.615385 | 0.958974 | 0.901709 | 0.622992 |
| 147 | 0.615385 | 0.964103 | 0.905983 | 0.637037 |
| 148 | 0.615385 | 0.964103 | 0.905983 | 0.637037 |
| 149 | 0.615385 | 0.969231 | 0.910256 | 0.651695 |
| 150 | 0.615385 | 0.969231 | 0.910256 | 0.651695 |
| 151 | 0.615385 | 0.969231 | 0.910256 | 0.651695 |
| 152 | 0.615385 | 0.969231 | 0.910256 | 0.651695 |
| 153 | 0.615385 | 0.969231 | 0.910256 | 0.651695 |
| 154 | 0.615385 | 0.969231 | 0.910256 | 0.651695 |
| 155 | 0.615385 | 0.969231 | 0.910256 | 0.651695 |
| 156 | 0.615385 | 0.969231 | 0.910256 | 0.651695 |
| 157 | 0.615385 | 0.969231 | 0.910256 | 0.651695 |
| 158 | 0.615385 | 0.969231 | 0.910256 | 0.651695 |
| 159 | 0.615385 | 0.969231 | 0.910256 | 0.651695 |
| 160 | 0.615385 | 0.974359 | 0.91453  | 0.667017 |
| 161 | 0.615385 | 0.974359 | 0.91453  | 0.667017 |
| 162 | 0.615385 | 0.969231 | 0.910256 | 0.651695 |
| 163 | 0.615385 | 0.969231 | 0.910256 | 0.651695 |
| 164 | 0.615385 | 0.969231 | 0.910256 | 0.651695 |
| 165 | 0.615385 | 0.969231 | 0.910256 | 0.651695 |
| 166 | 0.615385 | 0.964103 | 0.905983 | 0.637037 |
| 167 | 0.641026 | 0.958974 | 0.905983 | 0.64246  |
| 168 | 0.641026 | 0.958974 | 0.905983 | 0.64246  |
| 169 | 0.615385 | 0.958974 | 0.901709 | 0.622992 |
| 170 | 0.615385 | 0.958974 | 0.901709 | 0.622992 |
| 171 | 0.615385 | 0.958974 | 0.901709 | 0.622992 |
| 172 | 0.615385 | 0.958974 | 0.901709 | 0.622992 |
| 173 | 0.615385 | 0.958974 | 0.901709 | 0.622992 |
| 174 | 0.615385 | 0.958974 | 0.901709 | 0.622992 |
| 175 | 0.615385 | 0.953846 | 0.897436 | 0.609513 |
| 176 | 0.615385 | 0.953846 | 0.897436 | 0.609513 |
| 177 | 0.615385 | 0.948718 | 0.893162 | 0.596559 |
| 178 | 0.615385 | 0.953846 | 0.897436 | 0.609513 |
| 179 | 0.615385 | 0.948718 | 0.893162 | 0.596559 |
| 180 | 0.615385 | 0.948718 | 0.893162 | 0.596559 |
| 181 | 0.641026 | 0.964103 | 0.910256 | 0.656366 |
| 182 | 0.641026 | 0.964103 | 0.910256 | 0.656366 |
| 183 | 0.641026 | 0.964103 | 0.910256 | 0.656366 |
| 184 | 0.641026 | 0.964103 | 0.910256 | 0.656366 |



|     |          |          |          |          |
|-----|----------|----------|----------|----------|
| 185 | 0.641026 | 0.964103 | 0.910256 | 0.656366 |
| 186 | 0.641026 | 0.964103 | 0.910256 | 0.656366 |
| 187 | 0.641026 | 0.964103 | 0.910256 | 0.656366 |
| 188 | 0.641026 | 0.964103 | 0.910256 | 0.656366 |
| 189 | 0.641026 | 0.958974 | 0.905983 | 0.64246  |
| 190 | 0.641026 | 0.958974 | 0.905983 | 0.64246  |
| 191 | 0.641026 | 0.964103 | 0.910256 | 0.656366 |
| 192 | 0.641026 | 0.958974 | 0.905983 | 0.64246  |
| 193 | 0.641026 | 0.953846 | 0.901709 | 0.629098 |
| 194 | 0.641026 | 0.958974 | 0.905983 | 0.64246  |
| 195 | 0.641026 | 0.958974 | 0.905983 | 0.64246  |
| 196 | 0.641026 | 0.953846 | 0.901709 | 0.629098 |
| 197 | 0.641026 | 0.953846 | 0.901709 | 0.629098 |
| 198 | 0.641026 | 0.953846 | 0.901709 | 0.629098 |
| 199 | 0.641026 | 0.953846 | 0.901709 | 0.629098 |
| 200 | 0.641026 | 0.953846 | 0.901709 | 0.629098 |
| 201 | 0.641026 | 0.953846 | 0.901709 | 0.629098 |
| 202 | 0.641026 | 0.958974 | 0.905983 | 0.64246  |
| 203 | 0.641026 | 0.958974 | 0.905983 | 0.64246  |
| 204 | 0.641026 | 0.969231 | 0.91453  | 0.670862 |
| 205 | 0.641026 | 0.969231 | 0.91453  | 0.670862 |
| 206 | 0.641026 | 0.964103 | 0.910256 | 0.656366 |
| 207 | 0.641026 | 0.953846 | 0.901709 | 0.629098 |
| 208 | 0.641026 | 0.953846 | 0.901709 | 0.629098 |
| 209 | 0.641026 | 0.953846 | 0.901709 | 0.629098 |
| 210 | 0.641026 | 0.953846 | 0.901709 | 0.629098 |
| 211 | 0.641026 | 0.953846 | 0.901709 | 0.629098 |
| 212 | 0.641026 | 0.958974 | 0.905983 | 0.64246  |
| 213 | 0.641026 | 0.953846 | 0.901709 | 0.629098 |
| 214 | 0.641026 | 0.953846 | 0.901709 | 0.629098 |
| 215 | 0.666667 | 0.969231 | 0.918803 | 0.689741 |
| 216 | 0.666667 | 0.969231 | 0.918803 | 0.689741 |
| 217 | 0.666667 | 0.969231 | 0.918803 | 0.689741 |
| 218 | 0.666667 | 0.969231 | 0.918803 | 0.689741 |
| 219 | 0.666667 | 0.969231 | 0.918803 | 0.689741 |
| 220 | 0.666667 | 0.969231 | 0.918803 | 0.689741 |
| 221 | 0.666667 | 0.969231 | 0.918803 | 0.689741 |
| 222 | 0.666667 | 0.969231 | 0.918803 | 0.689741 |
| 223 | 0.666667 | 0.969231 | 0.918803 | 0.689741 |
| 224 | 0.666667 | 0.969231 | 0.918803 | 0.689741 |
| 225 | 0.666667 | 0.969231 | 0.918803 | 0.689741 |
| 226 | 0.692308 | 0.974359 | 0.92735  | 0.723116 |
| 227 | 0.692308 | 0.969231 | 0.923077 | 0.708353 |

|     |          |          |          |          |
|-----|----------|----------|----------|----------|
| 228 | 0.692308 | 0.964103 | 0.918803 | 0.694177 |
| 229 | 0.666667 | 0.964103 | 0.91453  | 0.675406 |
| 230 | 0.666667 | 0.964103 | 0.91453  | 0.675406 |
| 231 | 0.666667 | 0.964103 | 0.91453  | 0.675406 |
| 232 | 0.692308 | 0.964103 | 0.918803 | 0.694177 |
| 233 | 0.692308 | 0.964103 | 0.918803 | 0.694177 |
| 234 | 0.692308 | 0.964103 | 0.918803 | 0.694177 |
| 235 | 0.692308 | 0.964103 | 0.918803 | 0.694177 |
| 236 | 0.692308 | 0.969231 | 0.923077 | 0.708353 |
| 237 | 0.692308 | 0.964103 | 0.918803 | 0.694177 |
| 238 | 0.692308 | 0.964103 | 0.918803 | 0.694177 |
| 239 | 0.692308 | 0.969231 | 0.923077 | 0.708353 |
| 240 | 0.692308 | 0.969231 | 0.923077 | 0.708353 |
| 241 | 0.692308 | 0.969231 | 0.923077 | 0.708353 |
| 242 | 0.692308 | 0.969231 | 0.923077 | 0.708353 |
| 243 | 0.692308 | 0.969231 | 0.923077 | 0.708353 |
| 244 | 0.692308 | 0.969231 | 0.923077 | 0.708353 |
| 245 | 0.692308 | 0.969231 | 0.923077 | 0.708353 |
| 246 | 0.692308 | 0.964103 | 0.918803 | 0.694177 |
| 247 | 0.692308 | 0.969231 | 0.923077 | 0.708353 |
| 248 | 0.692308 | 0.969231 | 0.923077 | 0.708353 |
| 249 | 0.692308 | 0.969231 | 0.923077 | 0.708353 |
| 250 | 0.692308 | 0.969231 | 0.923077 | 0.708353 |
| 251 | 0.692308 | 0.969231 | 0.923077 | 0.708353 |
| 252 | 0.692308 | 0.969231 | 0.923077 | 0.708353 |
| 253 | 0.692308 | 0.964103 | 0.918803 | 0.694177 |
| 254 | 0.692308 | 0.964103 | 0.918803 | 0.694177 |
| 255 | 0.692308 | 0.964103 | 0.918803 | 0.694177 |
| 256 | 0.692308 | 0.974359 | 0.92735  | 0.723116 |
| 257 | 0.692308 | 0.974359 | 0.92735  | 0.723116 |
| 258 | 0.692308 | 0.969231 | 0.923077 | 0.708353 |
| 259 | 0.692308 | 0.969231 | 0.923077 | 0.708353 |
| 260 | 0.692308 | 0.969231 | 0.923077 | 0.708353 |
| 261 | 0.692308 | 0.969231 | 0.923077 | 0.708353 |
| 262 | 0.692308 | 0.969231 | 0.923077 | 0.708353 |
| 263 | 0.692308 | 0.969231 | 0.923077 | 0.708353 |
| 264 | 0.692308 | 0.969231 | 0.923077 | 0.708353 |
| 265 | 0.692308 | 0.969231 | 0.923077 | 0.708353 |
| 266 | 0.692308 | 0.969231 | 0.923077 | 0.708353 |
| 267 | 0.692308 | 0.969231 | 0.923077 | 0.708353 |
| 268 | 0.692308 | 0.969231 | 0.923077 | 0.708353 |
| 269 | 0.692308 | 0.969231 | 0.923077 | 0.708353 |
| 270 | 0.692308 | 0.969231 | 0.923077 | 0.708353 |

|     |          |          |          |          |
|-----|----------|----------|----------|----------|
| 271 | 0.692308 | 0.969231 | 0.923077 | 0.708353 |
| 272 | 0.692308 | 0.969231 | 0.923077 | 0.708353 |
| 273 | 0.692308 | 0.969231 | 0.923077 | 0.708353 |
| 274 | 0.692308 | 0.969231 | 0.923077 | 0.708353 |
| 275 | 0.692308 | 0.969231 | 0.923077 | 0.708353 |
| 276 | 0.692308 | 0.969231 | 0.923077 | 0.708353 |
| 277 | 0.692308 | 0.969231 | 0.923077 | 0.708353 |
| 278 | 0.692308 | 0.969231 | 0.923077 | 0.708353 |
| 279 | 0.692308 | 0.969231 | 0.923077 | 0.708353 |
| 280 | 0.692308 | 0.969231 | 0.923077 | 0.708353 |
| 281 | 0.692308 | 0.964103 | 0.918803 | 0.694177 |
| 282 | 0.692308 | 0.964103 | 0.918803 | 0.694177 |
| 283 | 0.692308 | 0.964103 | 0.918803 | 0.694177 |
| 284 | 0.692308 | 0.964103 | 0.918803 | 0.694177 |
| 285 | 0.692308 | 0.969231 | 0.923077 | 0.708353 |
| 286 | 0.692308 | 0.969231 | 0.923077 | 0.708353 |
| 287 | 0.692308 | 0.969231 | 0.923077 | 0.708353 |
| 288 | 0.692308 | 0.969231 | 0.923077 | 0.708353 |
| 289 | 0.692308 | 0.969231 | 0.923077 | 0.708353 |
| 290 | 0.692308 | 0.969231 | 0.923077 | 0.708353 |
| 291 | 0.692308 | 0.969231 | 0.923077 | 0.708353 |
| 292 | 0.692308 | 0.969231 | 0.923077 | 0.708353 |
| 293 | 0.692308 | 0.969231 | 0.923077 | 0.708353 |
| 294 | 0.692308 | 0.969231 | 0.923077 | 0.708353 |
| 295 | 0.692308 | 0.969231 | 0.923077 | 0.708353 |
| 296 | 0.666667 | 0.969231 | 0.918803 | 0.689741 |
| 297 | 0.666667 | 0.969231 | 0.918803 | 0.689741 |
| 298 | 0.666667 | 0.969231 | 0.918803 | 0.689741 |
| 299 | 0.666667 | 0.969231 | 0.918803 | 0.689741 |
| 300 | 0.666667 | 0.969231 | 0.918803 | 0.689741 |
| 301 | 0.666667 | 0.969231 | 0.918803 | 0.689741 |
| 302 | 0.666667 | 0.969231 | 0.918803 | 0.689741 |
| 303 | 0.666667 | 0.969231 | 0.918803 | 0.689741 |
| 304 | 0.666667 | 0.969231 | 0.918803 | 0.689741 |
| 305 | 0.666667 | 0.969231 | 0.918803 | 0.689741 |
| 306 | 0.666667 | 0.969231 | 0.918803 | 0.689741 |
| 307 | 0.666667 | 0.969231 | 0.918803 | 0.689741 |
| 308 | 0.666667 | 0.969231 | 0.918803 | 0.689741 |
| 309 | 0.666667 | 0.969231 | 0.918803 | 0.689741 |
| 310 | 0.666667 | 0.969231 | 0.918803 | 0.689741 |
| 311 | 0.666667 | 0.969231 | 0.918803 | 0.689741 |
| 312 | 0.666667 | 0.969231 | 0.918803 | 0.689741 |
| 313 | 0.666667 | 0.969231 | 0.918803 | 0.689741 |

|     |          |          |          |          |
|-----|----------|----------|----------|----------|
| 314 | 0.666667 | 0.969231 | 0.918803 | 0.689741 |
| 315 | 0.666667 | 0.969231 | 0.918803 | 0.689741 |
| 316 | 0.666667 | 0.969231 | 0.918803 | 0.689741 |
| 317 | 0.666667 | 0.969231 | 0.918803 | 0.689741 |
| 318 | 0.666667 | 0.969231 | 0.918803 | 0.689741 |
| 319 | 0.666667 | 0.969231 | 0.918803 | 0.689741 |
| 320 | 0.666667 | 0.969231 | 0.918803 | 0.689741 |
| 321 | 0.666667 | 0.969231 | 0.918803 | 0.689741 |
| 322 | 0.666667 | 0.969231 | 0.918803 | 0.689741 |
| 323 | 0.666667 | 0.969231 | 0.918803 | 0.689741 |
| 324 | 0.666667 | 0.969231 | 0.918803 | 0.689741 |
| 325 | 0.666667 | 0.974359 | 0.923077 | 0.704687 |
| 326 | 0.666667 | 0.974359 | 0.923077 | 0.704687 |
| 327 | 0.666667 | 0.974359 | 0.923077 | 0.704687 |
| 328 | 0.666667 | 0.974359 | 0.923077 | 0.704687 |
| 329 | 0.666667 | 0.974359 | 0.923077 | 0.704687 |
| 330 | 0.666667 | 0.974359 | 0.923077 | 0.704687 |
| 331 | 0.666667 | 0.969231 | 0.918803 | 0.689741 |
| 332 | 0.666667 | 0.964103 | 0.91453  | 0.675406 |
| 333 | 0.666667 | 0.964103 | 0.91453  | 0.675406 |
| 334 | 0.666667 | 0.964103 | 0.91453  | 0.675406 |
| 335 | 0.666667 | 0.964103 | 0.91453  | 0.675406 |
| 336 | 0.666667 | 0.964103 | 0.91453  | 0.675406 |
| 337 | 0.666667 | 0.964103 | 0.91453  | 0.675406 |
| 338 | 0.666667 | 0.964103 | 0.91453  | 0.675406 |
| 339 | 0.666667 | 0.964103 | 0.91453  | 0.675406 |
| 340 | 0.666667 | 0.964103 | 0.91453  | 0.675406 |
| 341 | 0.666667 | 0.964103 | 0.91453  | 0.675406 |
| 342 | 0.666667 | 0.964103 | 0.91453  | 0.675406 |
| 343 | 0.666667 | 0.964103 | 0.91453  | 0.675406 |
| 344 | 0.692308 | 0.964103 | 0.918803 | 0.694177 |
| 345 | 0.692308 | 0.964103 | 0.918803 | 0.694177 |
| 346 | 0.641026 | 0.964103 | 0.910256 | 0.656366 |
| 347 | 0.641026 | 0.964103 | 0.910256 | 0.656366 |
| 348 | 0.641026 | 0.969231 | 0.91453  | 0.670862 |
| 349 | 0.666667 | 0.964103 | 0.91453  | 0.675406 |
| 350 | 0.666667 | 0.964103 | 0.91453  | 0.675406 |
| 351 | 0.641026 | 0.964103 | 0.910256 | 0.656366 |
| 352 | 0.641026 | 0.964103 | 0.910256 | 0.656366 |
| 353 | 0.641026 | 0.964103 | 0.910256 | 0.656366 |
| 354 | 0.641026 | 0.964103 | 0.910256 | 0.656366 |
| 355 | 0.641026 | 0.964103 | 0.910256 | 0.656366 |
| 356 | 0.641026 | 0.964103 | 0.910256 | 0.656366 |

|     |          |          |          |          |
|-----|----------|----------|----------|----------|
| 357 | 0.641026 | 0.964103 | 0.910256 | 0.656366 |
| 358 | 0.641026 | 0.964103 | 0.910256 | 0.656366 |
| 359 | 0.641026 | 0.964103 | 0.910256 | 0.656366 |
| 360 | 0.666667 | 0.964103 | 0.91453  | 0.675406 |
| 361 | 0.666667 | 0.964103 | 0.91453  | 0.675406 |
| 362 | 0.666667 | 0.964103 | 0.91453  | 0.675406 |
| 363 | 0.666667 | 0.969231 | 0.918803 | 0.689741 |
| 364 | 0.666667 | 0.969231 | 0.918803 | 0.689741 |
| 365 | 0.666667 | 0.969231 | 0.918803 | 0.689741 |
| 366 | 0.666667 | 0.969231 | 0.918803 | 0.689741 |
| 367 | 0.666667 | 0.969231 | 0.918803 | 0.689741 |
| 368 | 0.666667 | 0.969231 | 0.918803 | 0.689741 |
| 369 | 0.666667 | 0.969231 | 0.918803 | 0.689741 |
| 370 | 0.666667 | 0.969231 | 0.918803 | 0.689741 |
| 371 | 0.666667 | 0.969231 | 0.918803 | 0.689741 |
| 372 | 0.666667 | 0.964103 | 0.91453  | 0.675406 |
| 373 | 0.666667 | 0.964103 | 0.91453  | 0.675406 |
| 374 | 0.666667 | 0.958974 | 0.910256 | 0.661638 |
| 375 | 0.666667 | 0.958974 | 0.910256 | 0.661638 |
| 376 | 0.666667 | 0.958974 | 0.910256 | 0.661638 |
| 377 | 0.666667 | 0.953846 | 0.905983 | 0.648395 |
| 378 | 0.666667 | 0.953846 | 0.905983 | 0.648395 |
| 379 | 0.666667 | 0.958974 | 0.910256 | 0.661638 |
| 380 | 0.666667 | 0.958974 | 0.910256 | 0.661638 |
| 381 | 0.666667 | 0.958974 | 0.910256 | 0.661638 |
| 382 | 0.666667 | 0.958974 | 0.910256 | 0.661638 |
| 383 | 0.666667 | 0.964103 | 0.91453  | 0.675406 |
| 384 | 0.666667 | 0.964103 | 0.91453  | 0.675406 |
| 385 | 0.666667 | 0.964103 | 0.91453  | 0.675406 |
| 386 | 0.666667 | 0.964103 | 0.91453  | 0.675406 |
| 387 | 0.666667 | 0.964103 | 0.91453  | 0.675406 |
| 388 | 0.666667 | 0.964103 | 0.91453  | 0.675406 |
| 389 | 0.666667 | 0.964103 | 0.91453  | 0.675406 |
| 390 | 0.666667 | 0.964103 | 0.91453  | 0.675406 |
| 391 | 0.666667 | 0.964103 | 0.91453  | 0.675406 |
| 392 | 0.641026 | 0.958974 | 0.905983 | 0.64246  |
| 393 | 0.641026 | 0.964103 | 0.910256 | 0.656366 |
| 394 | 0.641026 | 0.964103 | 0.910256 | 0.656366 |
| 395 | 0.641026 | 0.964103 | 0.910256 | 0.656366 |
| 396 | 0.641026 | 0.964103 | 0.910256 | 0.656366 |
| 397 | 0.641026 | 0.964103 | 0.910256 | 0.656366 |
| 398 | 0.641026 | 0.964103 | 0.910256 | 0.656366 |
| 399 | 0.641026 | 0.964103 | 0.910256 | 0.656366 |

|     |          |          |          |          |
|-----|----------|----------|----------|----------|
| 400 | 0.641026 | 0.964103 | 0.910256 | 0.656366 |
| 401 | 0.641026 | 0.964103 | 0.910256 | 0.656366 |
| 402 | 0.641026 | 0.964103 | 0.910256 | 0.656366 |
| 403 | 0.641026 | 0.964103 | 0.910256 | 0.656366 |
| 404 | 0.641026 | 0.964103 | 0.910256 | 0.656366 |
| 405 | 0.641026 | 0.964103 | 0.910256 | 0.656366 |
| 406 | 0.641026 | 0.964103 | 0.910256 | 0.656366 |
| 407 | 0.641026 | 0.964103 | 0.910256 | 0.656366 |
| 408 | 0.615385 | 0.958974 | 0.901709 | 0.622992 |
| 409 | 0.615385 | 0.958974 | 0.901709 | 0.622992 |
| 410 | 0.615385 | 0.958974 | 0.901709 | 0.622992 |
| 411 | 0.615385 | 0.958974 | 0.901709 | 0.622992 |
| 412 | 0.615385 | 0.958974 | 0.901709 | 0.622992 |
| 413 | 0.615385 | 0.958974 | 0.901709 | 0.622992 |
| 414 | 0.615385 | 0.958974 | 0.901709 | 0.622992 |
| 415 | 0.615385 | 0.958974 | 0.901709 | 0.622992 |
| 416 | 0.615385 | 0.958974 | 0.901709 | 0.622992 |
| 417 | 0.615385 | 0.958974 | 0.901709 | 0.622992 |
| 418 | 0.615385 | 0.958974 | 0.901709 | 0.622992 |
| 419 | 0.615385 | 0.958974 | 0.901709 | 0.622992 |
| 420 | 0.615385 | 0.964103 | 0.905983 | 0.637037 |
| 421 | 0.615385 | 0.964103 | 0.905983 | 0.637037 |
| 422 | 0.615385 | 0.964103 | 0.905983 | 0.637037 |
| 423 | 0.615385 | 0.964103 | 0.905983 | 0.637037 |
| 424 | 0.615385 | 0.964103 | 0.905983 | 0.637037 |
| 425 | 0.615385 | 0.964103 | 0.905983 | 0.637037 |
| 426 | 0.615385 | 0.964103 | 0.905983 | 0.637037 |
| 427 | 0.615385 | 0.969231 | 0.910256 | 0.651695 |
| 428 | 0.615385 | 0.969231 | 0.910256 | 0.651695 |
| 429 | 0.615385 | 0.969231 | 0.910256 | 0.651695 |
| 430 | 0.615385 | 0.964103 | 0.905983 | 0.637037 |
| 431 | 0.615385 | 0.969231 | 0.910256 | 0.651695 |
| 432 | 0.615385 | 0.969231 | 0.910256 | 0.651695 |
| 433 | 0.615385 | 0.969231 | 0.910256 | 0.651695 |
| 434 | 0.615385 | 0.969231 | 0.910256 | 0.651695 |
| 435 | 0.615385 | 0.969231 | 0.910256 | 0.651695 |
| 436 | 0.615385 | 0.969231 | 0.910256 | 0.651695 |
| 437 | 0.589744 | 0.969231 | 0.905983 | 0.632216 |
| 438 | 0.615385 | 0.969231 | 0.910256 | 0.651695 |
| 439 | 0.589744 | 0.969231 | 0.905983 | 0.632216 |
| 440 | 0.589744 | 0.969231 | 0.905983 | 0.632216 |
| 441 | 0.641026 | 0.969231 | 0.91453  | 0.670862 |
| 442 | 0.641026 | 0.969231 | 0.91453  | 0.670862 |

|     |          |          |          |          |
|-----|----------|----------|----------|----------|
| 443 | 0.641026 | 0.969231 | 0.91453  | 0.670862 |
| 444 | 0.641026 | 0.969231 | 0.91453  | 0.670862 |
| 445 | 0.615385 | 0.969231 | 0.910256 | 0.651695 |
| 446 | 0.615385 | 0.969231 | 0.910256 | 0.651695 |
| 447 | 0.615385 | 0.969231 | 0.910256 | 0.651695 |
| 448 | 0.615385 | 0.969231 | 0.910256 | 0.651695 |
| 449 | 0.615385 | 0.969231 | 0.910256 | 0.651695 |
| 450 | 0.615385 | 0.969231 | 0.910256 | 0.651695 |
| 451 | 0.615385 | 0.969231 | 0.910256 | 0.651695 |
| 452 | 0.615385 | 0.969231 | 0.910256 | 0.651695 |
| 453 | 0.615385 | 0.969231 | 0.910256 | 0.651695 |
| 454 | 0.615385 | 0.969231 | 0.910256 | 0.651695 |
| 455 | 0.615385 | 0.969231 | 0.910256 | 0.651695 |
| 456 | 0.615385 | 0.969231 | 0.910256 | 0.651695 |
| 457 | 0.615385 | 0.969231 | 0.910256 | 0.651695 |
| 458 | 0.615385 | 0.969231 | 0.910256 | 0.651695 |
| 459 | 0.615385 | 0.969231 | 0.910256 | 0.651695 |
| 460 | 0.615385 | 0.969231 | 0.910256 | 0.651695 |
| 461 | 0.615385 | 0.969231 | 0.910256 | 0.651695 |
| 462 | 0.615385 | 0.969231 | 0.910256 | 0.651695 |
| 463 | 0.615385 | 0.969231 | 0.910256 | 0.651695 |
| 464 | 0.615385 | 0.969231 | 0.910256 | 0.651695 |
| 465 | 0.615385 | 0.969231 | 0.910256 | 0.651695 |
| 466 | 0.615385 | 0.969231 | 0.910256 | 0.651695 |
| 467 | 0.615385 | 0.969231 | 0.910256 | 0.651695 |
| 468 | 0.615385 | 0.969231 | 0.910256 | 0.651695 |
| 469 | 0.615385 | 0.969231 | 0.910256 | 0.651695 |
| 470 | 0.615385 | 0.964103 | 0.905983 | 0.637037 |
| 471 | 0.615385 | 0.964103 | 0.905983 | 0.637037 |
| 472 | 0.615385 | 0.964103 | 0.905983 | 0.637037 |
| 473 | 0.615385 | 0.964103 | 0.905983 | 0.637037 |
| 474 | 0.615385 | 0.964103 | 0.905983 | 0.637037 |
| 475 | 0.615385 | 0.964103 | 0.905983 | 0.637037 |
| 476 | 0.589744 | 0.953846 | 0.893162 | 0.589617 |
| 477 | 0.589744 | 0.953846 | 0.893162 | 0.589617 |
| 478 | 0.589744 | 0.958974 | 0.897436 | 0.603212 |
| 479 | 0.589744 | 0.958974 | 0.897436 | 0.603212 |
| 480 | 0.589744 | 0.953846 | 0.893162 | 0.589617 |
| 481 | 0.589744 | 0.953846 | 0.893162 | 0.589617 |
| 482 | 0.589744 | 0.953846 | 0.893162 | 0.589617 |
| 483 | 0.589744 | 0.958974 | 0.897436 | 0.603212 |
| 484 | 0.589744 | 0.958974 | 0.897436 | 0.603212 |
| 485 | 0.589744 | 0.958974 | 0.897436 | 0.603212 |

|     |          |          |          |          |
|-----|----------|----------|----------|----------|
| 486 | 0.589744 | 0.964103 | 0.901709 | 0.617395 |
| 487 | 0.589744 | 0.964103 | 0.901709 | 0.617395 |
| 488 | 0.589744 | 0.964103 | 0.901709 | 0.617395 |
| 489 | 0.589744 | 0.964103 | 0.901709 | 0.617395 |
| 490 | 0.589744 | 0.964103 | 0.901709 | 0.617395 |
| 491 | 0.589744 | 0.964103 | 0.901709 | 0.617395 |
| 492 | 0.589744 | 0.964103 | 0.901709 | 0.617395 |
| 493 | 0.589744 | 0.964103 | 0.901709 | 0.617395 |
| 494 | 0.589744 | 0.964103 | 0.901709 | 0.617395 |
| 495 | 0.589744 | 0.964103 | 0.901709 | 0.617395 |
| 496 | 0.589744 | 0.958974 | 0.897436 | 0.603212 |
| 497 | 0.589744 | 0.958974 | 0.897436 | 0.603212 |
| 498 | 0.589744 | 0.958974 | 0.897436 | 0.603212 |
| 499 | 0.564103 | 0.958974 | 0.893162 | 0.583095 |
| 500 | 0.589744 | 0.964103 | 0.901709 | 0.617395 |

(3) Dataset  $D_3$

| Number of features | SN       | SP       | ACC      | MCC      |
|--------------------|----------|----------|----------|----------|
| 4                  | 0.410256 | 0.994872 | 0.897436 | 0.581685 |
| 5                  | 0.461538 | 0.989744 | 0.901709 | 0.601556 |
| 6                  | 0.512821 | 0.989744 | 0.910256 | 0.641744 |
| 7                  | 0.615385 | 0.989744 | 0.92735  | 0.717594 |
| 8                  | 0.641026 | 0.994872 | 0.935897 | 0.754082 |
| 9                  | 0.641026 | 0.994872 | 0.935897 | 0.754082 |
| 10                 | 0.589744 | 0.994872 | 0.92735  | 0.718132 |
| 11                 | 0.641026 | 0.994872 | 0.935897 | 0.754082 |
| 12                 | 0.641026 | 0.994872 | 0.935897 | 0.754082 |
| 13                 | 0.666667 | 0.984615 | 0.931624 | 0.736619 |
| 14                 | 0.615385 | 0.979487 | 0.918803 | 0.683062 |
| 15                 | 0.615385 | 0.979487 | 0.918803 | 0.683062 |
| 16                 | 0.641026 | 0.974359 | 0.918803 | 0.685994 |
| 17                 | 0.615385 | 0.979487 | 0.918803 | 0.683062 |
| 18                 | 0.641026 | 0.984615 | 0.92735  | 0.718393 |
| 19                 | 0.666667 | 0.979487 | 0.92735  | 0.720294 |
| 20                 | 0.666667 | 0.974359 | 0.923077 | 0.704687 |
| 21                 | 0.641026 | 0.974359 | 0.918803 | 0.685994 |
| 22                 | 0.666667 | 0.979487 | 0.92735  | 0.720294 |
| 23                 | 0.641026 | 0.979487 | 0.923077 | 0.701818 |
| 24                 | 0.641026 | 0.979487 | 0.923077 | 0.701818 |
| 25                 | 0.641026 | 0.979487 | 0.923077 | 0.701818 |
| 26                 | 0.641026 | 0.984615 | 0.92735  | 0.718393 |
| 27                 | 0.666667 | 0.984615 | 0.931624 | 0.736619 |



|    |          |          |          |          |
|----|----------|----------|----------|----------|
| 28 | 0.666667 | 0.984615 | 0.931624 | 0.736619 |
| 29 | 0.666667 | 0.984615 | 0.931624 | 0.736619 |
| 30 | 0.666667 | 0.984615 | 0.931624 | 0.736619 |
| 31 | 0.641026 | 0.984615 | 0.92735  | 0.718393 |
| 32 | 0.615385 | 0.984615 | 0.923077 | 0.699896 |
| 33 | 0.666667 | 0.984615 | 0.931624 | 0.736619 |
| 34 | 0.641026 | 0.984615 | 0.92735  | 0.718393 |
| 35 | 0.615385 | 0.984615 | 0.923077 | 0.699896 |
| 36 | 0.666667 | 0.989744 | 0.935897 | 0.753724 |
| 37 | 0.666667 | 0.989744 | 0.935897 | 0.753724 |
| 38 | 0.641026 | 0.989744 | 0.931624 | 0.735789 |
| 39 | 0.692308 | 0.984615 | 0.935897 | 0.754594 |
| 40 | 0.692308 | 0.984615 | 0.935897 | 0.754594 |
| 41 | 0.692308 | 0.984615 | 0.935897 | 0.754594 |
| 42 | 0.615385 | 0.984615 | 0.923077 | 0.699896 |
| 43 | 0.641026 | 0.984615 | 0.92735  | 0.718393 |
| 44 | 0.641026 | 0.984615 | 0.92735  | 0.718393 |
| 45 | 0.641026 | 0.974359 | 0.918803 | 0.685994 |
| 46 | 0.641026 | 0.979487 | 0.923077 | 0.701818 |
| 47 | 0.641026 | 0.979487 | 0.923077 | 0.701818 |
| 48 | 0.641026 | 0.979487 | 0.923077 | 0.701818 |
| 49 | 0.641026 | 0.979487 | 0.923077 | 0.701818 |
| 50 | 0.641026 | 0.979487 | 0.923077 | 0.701818 |
| 51 | 0.641026 | 0.979487 | 0.923077 | 0.701818 |
| 52 | 0.641026 | 0.984615 | 0.92735  | 0.718393 |
| 53 | 0.641026 | 0.984615 | 0.92735  | 0.718393 |
| 54 | 0.641026 | 0.984615 | 0.92735  | 0.718393 |
| 55 | 0.666667 | 0.979487 | 0.92735  | 0.720294 |
| 56 | 0.641026 | 0.979487 | 0.923077 | 0.701818 |
| 57 | 0.641026 | 0.979487 | 0.923077 | 0.701818 |
| 58 | 0.641026 | 0.979487 | 0.923077 | 0.701818 |
| 59 | 0.641026 | 0.979487 | 0.923077 | 0.701818 |
| 60 | 0.666667 | 0.979487 | 0.92735  | 0.720294 |
| 61 | 0.692308 | 0.979487 | 0.931624 | 0.738512 |
| 62 | 0.641026 | 0.979487 | 0.923077 | 0.701818 |
| 63 | 0.666667 | 0.979487 | 0.92735  | 0.720294 |
| 64 | 0.666667 | 0.979487 | 0.92735  | 0.720294 |
| 65 | 0.641026 | 0.979487 | 0.923077 | 0.701818 |
| 66 | 0.641026 | 0.979487 | 0.923077 | 0.701818 |
| 67 | 0.641026 | 0.984615 | 0.92735  | 0.718393 |
| 68 | 0.641026 | 0.989744 | 0.931624 | 0.735789 |
| 69 | 0.666667 | 0.984615 | 0.931624 | 0.736619 |
| 70 | 0.666667 | 0.979487 | 0.92735  | 0.720294 |

|     |          |          |          |          |
|-----|----------|----------|----------|----------|
| 71  | 0.666667 | 0.984615 | 0.931624 | 0.736619 |
| 72  | 0.641026 | 0.989744 | 0.931624 | 0.735789 |
| 73  | 0.641026 | 0.989744 | 0.931624 | 0.735789 |
| 74  | 0.641026 | 0.989744 | 0.931624 | 0.735789 |
| 75  | 0.641026 | 0.984615 | 0.92735  | 0.718393 |
| 76  | 0.641026 | 0.989744 | 0.931624 | 0.735789 |
| 77  | 0.641026 | 0.984615 | 0.92735  | 0.718393 |
| 78  | 0.641026 | 0.984615 | 0.92735  | 0.718393 |
| 79  | 0.641026 | 0.984615 | 0.92735  | 0.718393 |
| 80  | 0.692308 | 0.989744 | 0.940171 | 0.77142  |
| 81  | 0.692308 | 0.989744 | 0.940171 | 0.77142  |
| 82  | 0.692308 | 0.984615 | 0.935897 | 0.754594 |
| 83  | 0.692308 | 0.989744 | 0.940171 | 0.77142  |
| 84  | 0.692308 | 0.989744 | 0.940171 | 0.77142  |
| 85  | 0.692308 | 0.989744 | 0.940171 | 0.77142  |
| 86  | 0.692308 | 0.989744 | 0.940171 | 0.77142  |
| 87  | 0.692308 | 0.989744 | 0.940171 | 0.77142  |
| 88  | 0.692308 | 0.989744 | 0.940171 | 0.77142  |
| 89  | 0.692308 | 0.994872 | 0.944444 | 0.789055 |
| 90  | 0.692308 | 0.994872 | 0.944444 | 0.789055 |
| 91  | 0.692308 | 0.994872 | 0.944444 | 0.789055 |
| 92  | 0.692308 | 0.989744 | 0.940171 | 0.77142  |
| 93  | 0.692308 | 0.989744 | 0.940171 | 0.77142  |
| 94  | 0.692308 | 0.989744 | 0.940171 | 0.77142  |
| 95  | 0.692308 | 0.989744 | 0.940171 | 0.77142  |
| 96  | 0.692308 | 0.989744 | 0.940171 | 0.77142  |
| 97  | 0.692308 | 0.989744 | 0.940171 | 0.77142  |
| 98  | 0.692308 | 0.994872 | 0.944444 | 0.789055 |
| 99  | 0.692308 | 0.994872 | 0.944444 | 0.789055 |
| 100 | 0.692308 | 0.989744 | 0.940171 | 0.77142  |
| 101 | 0.692308 | 0.989744 | 0.940171 | 0.77142  |
| 102 | 0.794872 | 0.994872 | 0.961538 | 0.856614 |
| 103 | 0.794872 | 0.994872 | 0.961538 | 0.856614 |
| 104 | 0.820513 | 0.994872 | 0.965812 | 0.873086 |
| 105 | 0.794872 | 0.994872 | 0.961538 | 0.856614 |
| 106 | 0.820513 | 0.994872 | 0.965812 | 0.873086 |
| 107 | 0.820513 | 0.994872 | 0.965812 | 0.873086 |
| 108 | 0.820513 | 0.994872 | 0.965812 | 0.873086 |
| 109 | 0.820513 | 0.994872 | 0.965812 | 0.873086 |
| 110 | 0.820513 | 0.994872 | 0.965812 | 0.873086 |
| 111 | 0.820513 | 0.994872 | 0.965812 | 0.873086 |
| 112 | 0.820513 | 0.994872 | 0.965812 | 0.873086 |
| 113 | 0.820513 | 0.994872 | 0.965812 | 0.873086 |

|     |          |          |          |          |
|-----|----------|----------|----------|----------|
| 114 | 0.820513 | 0.994872 | 0.965812 | 0.873086 |
| 115 | 0.820513 | 0.994872 | 0.965812 | 0.873086 |
| 116 | 0.820513 | 0.994872 | 0.965812 | 0.873086 |
| 117 | 0.820513 | 0.994872 | 0.965812 | 0.873086 |
| 118 | 0.820513 | 0.994872 | 0.965812 | 0.873086 |
| 119 | 0.820513 | 0.994872 | 0.965812 | 0.873086 |
| 120 | 0.820513 | 0.994872 | 0.965812 | 0.873086 |
| 121 | 0.820513 | 0.994872 | 0.965812 | 0.873086 |
| 122 | 0.820513 | 0.989744 | 0.961538 | 0.856875 |
| 123 | 0.794872 | 0.989744 | 0.957265 | 0.84014  |
| 124 | 0.820513 | 0.994872 | 0.965812 | 0.873086 |
| 125 | 0.820513 | 0.994872 | 0.965812 | 0.873086 |
| 126 | 0.820513 | 0.994872 | 0.965812 | 0.873086 |
| 127 | 0.794872 | 0.994872 | 0.961538 | 0.856614 |
| 128 | 0.794872 | 0.994872 | 0.961538 | 0.856614 |
| 129 | 0.794872 | 0.994872 | 0.961538 | 0.856614 |
| 130 | 0.794872 | 0.994872 | 0.961538 | 0.856614 |
| 131 | 0.794872 | 0.994872 | 0.961538 | 0.856614 |
| 132 | 0.820513 | 0.994872 | 0.965812 | 0.873086 |
| 133 | 0.794872 | 0.994872 | 0.961538 | 0.856614 |
| 134 | 0.769231 | 0.994872 | 0.957265 | 0.839987 |
| 135 | 0.769231 | 0.989744 | 0.952991 | 0.823239 |
| 136 | 0.769231 | 0.989744 | 0.952991 | 0.823239 |
| 137 | 0.769231 | 0.989744 | 0.952991 | 0.823239 |
| 138 | 0.769231 | 0.989744 | 0.952991 | 0.823239 |
| 139 | 0.769231 | 0.989744 | 0.952991 | 0.823239 |
| 140 | 0.769231 | 0.989744 | 0.952991 | 0.823239 |
| 141 | 0.769231 | 0.994872 | 0.957265 | 0.839987 |
| 142 | 0.769231 | 0.994872 | 0.957265 | 0.839987 |
| 143 | 0.769231 | 0.994872 | 0.957265 | 0.839987 |
| 144 | 0.769231 | 0.994872 | 0.957265 | 0.839987 |
| 145 | 0.74359  | 0.994872 | 0.952991 | 0.823193 |
| 146 | 0.74359  | 0.989744 | 0.948718 | 0.806162 |
| 147 | 0.74359  | 0.989744 | 0.948718 | 0.806162 |
| 148 | 0.74359  | 0.989744 | 0.948718 | 0.806162 |
| 149 | 0.74359  | 0.989744 | 0.948718 | 0.806162 |
| 150 | 0.74359  | 0.989744 | 0.948718 | 0.806162 |
| 151 | 0.74359  | 0.989744 | 0.948718 | 0.806162 |
| 152 | 0.74359  | 0.989744 | 0.948718 | 0.806162 |
| 153 | 0.74359  | 0.989744 | 0.948718 | 0.806162 |
| 154 | 0.74359  | 0.989744 | 0.948718 | 0.806162 |
| 155 | 0.74359  | 0.989744 | 0.948718 | 0.806162 |
| 156 | 0.74359  | 0.984615 | 0.944444 | 0.789865 |

|     |          |          |          |          |
|-----|----------|----------|----------|----------|
| 157 | 0.74359  | 0.989744 | 0.948718 | 0.806162 |
| 158 | 0.74359  | 0.994872 | 0.952991 | 0.823193 |
| 159 | 0.74359  | 0.994872 | 0.952991 | 0.823193 |
| 160 | 0.74359  | 0.994872 | 0.952991 | 0.823193 |
| 161 | 0.74359  | 0.994872 | 0.952991 | 0.823193 |
| 162 | 0.74359  | 0.989744 | 0.948718 | 0.806162 |
| 163 | 0.74359  | 0.989744 | 0.948718 | 0.806162 |
| 164 | 0.74359  | 0.984615 | 0.944444 | 0.789865 |
| 165 | 0.74359  | 0.984615 | 0.944444 | 0.789865 |
| 166 | 0.74359  | 0.984615 | 0.944444 | 0.789865 |
| 167 | 0.74359  | 0.989744 | 0.948718 | 0.806162 |
| 168 | 0.74359  | 0.989744 | 0.948718 | 0.806162 |
| 169 | 0.74359  | 0.989744 | 0.948718 | 0.806162 |
| 170 | 0.74359  | 0.989744 | 0.948718 | 0.806162 |
| 171 | 0.74359  | 0.989744 | 0.948718 | 0.806162 |
| 172 | 0.74359  | 0.989744 | 0.948718 | 0.806162 |
| 173 | 0.74359  | 0.989744 | 0.948718 | 0.806162 |
| 174 | 0.74359  | 0.994872 | 0.952991 | 0.823193 |
| 175 | 0.74359  | 0.994872 | 0.952991 | 0.823193 |
| 176 | 0.74359  | 0.994872 | 0.952991 | 0.823193 |
| 177 | 0.74359  | 0.994872 | 0.952991 | 0.823193 |
| 178 | 0.74359  | 0.989744 | 0.948718 | 0.806162 |
| 179 | 0.74359  | 0.984615 | 0.944444 | 0.789865 |
| 180 | 0.74359  | 0.989744 | 0.948718 | 0.806162 |
| 181 | 0.74359  | 0.989744 | 0.948718 | 0.806162 |
| 182 | 0.74359  | 0.989744 | 0.948718 | 0.806162 |
| 183 | 0.74359  | 0.984615 | 0.944444 | 0.789865 |
| 184 | 0.74359  | 0.984615 | 0.944444 | 0.789865 |
| 185 | 0.769231 | 0.984615 | 0.948718 | 0.807193 |
| 186 | 0.769231 | 0.984615 | 0.948718 | 0.807193 |
| 187 | 0.769231 | 0.984615 | 0.948718 | 0.807193 |
| 188 | 0.769231 | 0.984615 | 0.948718 | 0.807193 |
| 189 | 0.74359  | 0.974359 | 0.935897 | 0.759257 |
| 190 | 0.74359  | 0.974359 | 0.935897 | 0.759257 |
| 191 | 0.74359  | 0.974359 | 0.935897 | 0.759257 |
| 192 | 0.74359  | 0.979487 | 0.940171 | 0.774246 |
| 193 | 0.74359  | 0.979487 | 0.940171 | 0.774246 |
| 194 | 0.74359  | 0.979487 | 0.940171 | 0.774246 |
| 195 | 0.74359  | 0.974359 | 0.935897 | 0.759257 |
| 196 | 0.74359  | 0.974359 | 0.935897 | 0.759257 |
| 197 | 0.717949 | 0.979487 | 0.935897 | 0.75649  |
| 198 | 0.717949 | 0.974359 | 0.931624 | 0.7413   |
| 199 | 0.74359  | 0.974359 | 0.935897 | 0.759257 |

|     |          |          |          |          |
|-----|----------|----------|----------|----------|
| 200 | 0.74359  | 0.974359 | 0.935897 | 0.759257 |
| 201 | 0.769231 | 0.974359 | 0.940171 | 0.777003 |
| 202 | 0.769231 | 0.974359 | 0.940171 | 0.777003 |
| 203 | 0.769231 | 0.974359 | 0.940171 | 0.777003 |
| 204 | 0.769231 | 0.974359 | 0.940171 | 0.777003 |
| 205 | 0.769231 | 0.974359 | 0.940171 | 0.777003 |
| 206 | 0.769231 | 0.974359 | 0.940171 | 0.777003 |
| 207 | 0.769231 | 0.974359 | 0.940171 | 0.777003 |
| 208 | 0.769231 | 0.974359 | 0.940171 | 0.777003 |
| 209 | 0.769231 | 0.974359 | 0.940171 | 0.777003 |
| 210 | 0.769231 | 0.974359 | 0.940171 | 0.777003 |
| 211 | 0.769231 | 0.974359 | 0.940171 | 0.777003 |
| 212 | 0.769231 | 0.974359 | 0.940171 | 0.777003 |
| 213 | 0.769231 | 0.974359 | 0.940171 | 0.777003 |
| 214 | 0.769231 | 0.974359 | 0.940171 | 0.777003 |
| 215 | 0.769231 | 0.969231 | 0.935897 | 0.76277  |
| 216 | 0.769231 | 0.969231 | 0.935897 | 0.76277  |
| 217 | 0.769231 | 0.969231 | 0.935897 | 0.76277  |
| 218 | 0.769231 | 0.969231 | 0.935897 | 0.76277  |
| 219 | 0.769231 | 0.969231 | 0.935897 | 0.76277  |
| 220 | 0.769231 | 0.969231 | 0.935897 | 0.76277  |
| 221 | 0.769231 | 0.974359 | 0.940171 | 0.777003 |
| 222 | 0.74359  | 0.979487 | 0.940171 | 0.774246 |
| 223 | 0.74359  | 0.979487 | 0.940171 | 0.774246 |
| 224 | 0.74359  | 0.979487 | 0.940171 | 0.774246 |
| 225 | 0.74359  | 0.979487 | 0.940171 | 0.774246 |
| 226 | 0.74359  | 0.979487 | 0.940171 | 0.774246 |
| 227 | 0.74359  | 0.974359 | 0.935897 | 0.759257 |
| 228 | 0.769231 | 0.974359 | 0.940171 | 0.777003 |
| 229 | 0.74359  | 0.974359 | 0.935897 | 0.759257 |
| 230 | 0.74359  | 0.974359 | 0.935897 | 0.759257 |
| 231 | 0.74359  | 0.974359 | 0.935897 | 0.759257 |
| 232 | 0.74359  | 0.974359 | 0.935897 | 0.759257 |
| 233 | 0.74359  | 0.974359 | 0.935897 | 0.759257 |
| 234 | 0.74359  | 0.974359 | 0.935897 | 0.759257 |
| 235 | 0.769231 | 0.974359 | 0.940171 | 0.777003 |
| 236 | 0.769231 | 0.974359 | 0.940171 | 0.777003 |
| 237 | 0.74359  | 0.974359 | 0.935897 | 0.759257 |
| 238 | 0.717949 | 0.974359 | 0.931624 | 0.7413   |
| 239 | 0.717949 | 0.974359 | 0.931624 | 0.7413   |
| 240 | 0.717949 | 0.974359 | 0.931624 | 0.7413   |
| 241 | 0.74359  | 0.974359 | 0.935897 | 0.759257 |
| 242 | 0.74359  | 0.974359 | 0.935897 | 0.759257 |

|     |          |          |          |          |
|-----|----------|----------|----------|----------|
| 243 | 0.74359  | 0.974359 | 0.935897 | 0.759257 |
| 244 | 0.74359  | 0.974359 | 0.935897 | 0.759257 |
| 245 | 0.717949 | 0.974359 | 0.931624 | 0.7413   |
| 246 | 0.717949 | 0.974359 | 0.931624 | 0.7413   |
| 247 | 0.74359  | 0.974359 | 0.935897 | 0.759257 |
| 248 | 0.74359  | 0.974359 | 0.935897 | 0.759257 |
| 249 | 0.717949 | 0.974359 | 0.931624 | 0.7413   |
| 250 | 0.717949 | 0.974359 | 0.931624 | 0.7413   |
| 251 | 0.717949 | 0.974359 | 0.931624 | 0.7413   |
| 252 | 0.74359  | 0.974359 | 0.935897 | 0.759257 |
| 253 | 0.74359  | 0.974359 | 0.935897 | 0.759257 |
| 254 | 0.74359  | 0.974359 | 0.935897 | 0.759257 |
| 255 | 0.74359  | 0.974359 | 0.935897 | 0.759257 |
| 256 | 0.74359  | 0.974359 | 0.935897 | 0.759257 |
| 257 | 0.74359  | 0.974359 | 0.935897 | 0.759257 |
| 258 | 0.74359  | 0.974359 | 0.935897 | 0.759257 |
| 259 | 0.74359  | 0.974359 | 0.935897 | 0.759257 |
| 260 | 0.717949 | 0.974359 | 0.931624 | 0.7413   |
| 261 | 0.717949 | 0.974359 | 0.931624 | 0.7413   |
| 262 | 0.717949 | 0.974359 | 0.931624 | 0.7413   |
| 263 | 0.717949 | 0.974359 | 0.931624 | 0.7413   |
| 264 | 0.717949 | 0.974359 | 0.931624 | 0.7413   |
| 265 | 0.717949 | 0.974359 | 0.931624 | 0.7413   |
| 266 | 0.717949 | 0.974359 | 0.931624 | 0.7413   |
| 267 | 0.717949 | 0.974359 | 0.931624 | 0.7413   |
| 268 | 0.717949 | 0.974359 | 0.931624 | 0.7413   |
| 269 | 0.717949 | 0.974359 | 0.931624 | 0.7413   |
| 270 | 0.717949 | 0.974359 | 0.931624 | 0.7413   |
| 271 | 0.717949 | 0.974359 | 0.931624 | 0.7413   |
| 272 | 0.717949 | 0.974359 | 0.931624 | 0.7413   |
| 273 | 0.717949 | 0.974359 | 0.931624 | 0.7413   |
| 274 | 0.717949 | 0.974359 | 0.931624 | 0.7413   |
| 275 | 0.692308 | 0.974359 | 0.92735  | 0.723116 |
| 276 | 0.692308 | 0.974359 | 0.92735  | 0.723116 |
| 277 | 0.692308 | 0.974359 | 0.92735  | 0.723116 |
| 278 | 0.692308 | 0.974359 | 0.92735  | 0.723116 |
| 279 | 0.692308 | 0.974359 | 0.92735  | 0.723116 |
| 280 | 0.692308 | 0.974359 | 0.92735  | 0.723116 |
| 281 | 0.692308 | 0.974359 | 0.92735  | 0.723116 |
| 282 | 0.692308 | 0.974359 | 0.92735  | 0.723116 |
| 283 | 0.692308 | 0.974359 | 0.92735  | 0.723116 |
| 284 | 0.692308 | 0.974359 | 0.92735  | 0.723116 |
| 285 | 0.692308 | 0.974359 | 0.92735  | 0.723116 |

|     |          |          |          |          |
|-----|----------|----------|----------|----------|
| 286 | 0.692308 | 0.974359 | 0.92735  | 0.723116 |
| 287 | 0.717949 | 0.974359 | 0.931624 | 0.7413   |
| 288 | 0.717949 | 0.974359 | 0.931624 | 0.7413   |
| 289 | 0.717949 | 0.974359 | 0.931624 | 0.7413   |
| 290 | 0.717949 | 0.974359 | 0.931624 | 0.7413   |
| 291 | 0.717949 | 0.974359 | 0.931624 | 0.7413   |
| 292 | 0.717949 | 0.974359 | 0.931624 | 0.7413   |
| 293 | 0.717949 | 0.974359 | 0.931624 | 0.7413   |
| 294 | 0.717949 | 0.974359 | 0.931624 | 0.7413   |
| 295 | 0.717949 | 0.974359 | 0.931624 | 0.7413   |
| 296 | 0.717949 | 0.974359 | 0.931624 | 0.7413   |
| 297 | 0.717949 | 0.974359 | 0.931624 | 0.7413   |
| 298 | 0.717949 | 0.974359 | 0.931624 | 0.7413   |
| 299 | 0.717949 | 0.974359 | 0.931624 | 0.7413   |
| 300 | 0.717949 | 0.974359 | 0.931624 | 0.7413   |
| 301 | 0.717949 | 0.974359 | 0.931624 | 0.7413   |
| 302 | 0.717949 | 0.974359 | 0.931624 | 0.7413   |
| 303 | 0.717949 | 0.974359 | 0.931624 | 0.7413   |
| 304 | 0.717949 | 0.974359 | 0.931624 | 0.7413   |
| 305 | 0.717949 | 0.974359 | 0.931624 | 0.7413   |
| 306 | 0.717949 | 0.974359 | 0.931624 | 0.7413   |
| 307 | 0.717949 | 0.974359 | 0.931624 | 0.7413   |
| 308 | 0.717949 | 0.974359 | 0.931624 | 0.7413   |
| 309 | 0.74359  | 0.974359 | 0.935897 | 0.759257 |
| 310 | 0.74359  | 0.974359 | 0.935897 | 0.759257 |
| 311 | 0.74359  | 0.974359 | 0.935897 | 0.759257 |
| 312 | 0.74359  | 0.974359 | 0.935897 | 0.759257 |
| 313 | 0.74359  | 0.974359 | 0.935897 | 0.759257 |
| 314 | 0.74359  | 0.974359 | 0.935897 | 0.759257 |
| 315 | 0.74359  | 0.974359 | 0.935897 | 0.759257 |
| 316 | 0.74359  | 0.974359 | 0.935897 | 0.759257 |
| 317 | 0.74359  | 0.974359 | 0.935897 | 0.759257 |
| 318 | 0.74359  | 0.974359 | 0.935897 | 0.759257 |
| 319 | 0.74359  | 0.974359 | 0.935897 | 0.759257 |
| 320 | 0.74359  | 0.974359 | 0.935897 | 0.759257 |
| 321 | 0.74359  | 0.974359 | 0.935897 | 0.759257 |
| 322 | 0.74359  | 0.974359 | 0.935897 | 0.759257 |
| 323 | 0.74359  | 0.974359 | 0.935897 | 0.759257 |
| 324 | 0.74359  | 0.974359 | 0.935897 | 0.759257 |
| 325 | 0.74359  | 0.974359 | 0.935897 | 0.759257 |
| 326 | 0.74359  | 0.974359 | 0.935897 | 0.759257 |
| 327 | 0.74359  | 0.974359 | 0.935897 | 0.759257 |
| 328 | 0.74359  | 0.974359 | 0.935897 | 0.759257 |

|     |          |          |          |          |
|-----|----------|----------|----------|----------|
| 329 | 0.74359  | 0.974359 | 0.935897 | 0.759257 |
| 330 | 0.74359  | 0.974359 | 0.935897 | 0.759257 |
| 331 | 0.717949 | 0.974359 | 0.931624 | 0.7413   |
| 332 | 0.74359  | 0.974359 | 0.935897 | 0.759257 |
| 333 | 0.74359  | 0.974359 | 0.935897 | 0.759257 |
| 334 | 0.74359  | 0.974359 | 0.935897 | 0.759257 |
| 335 | 0.74359  | 0.974359 | 0.935897 | 0.759257 |
| 336 | 0.74359  | 0.974359 | 0.935897 | 0.759257 |
| 337 | 0.74359  | 0.974359 | 0.935897 | 0.759257 |
| 338 | 0.74359  | 0.974359 | 0.935897 | 0.759257 |
| 339 | 0.717949 | 0.974359 | 0.931624 | 0.7413   |
| 340 | 0.74359  | 0.974359 | 0.935897 | 0.759257 |
| 341 | 0.74359  | 0.974359 | 0.935897 | 0.759257 |
| 342 | 0.74359  | 0.974359 | 0.935897 | 0.759257 |
| 343 | 0.717949 | 0.974359 | 0.931624 | 0.7413   |
| 344 | 0.717949 | 0.974359 | 0.931624 | 0.7413   |
| 345 | 0.717949 | 0.974359 | 0.931624 | 0.7413   |
| 346 | 0.717949 | 0.974359 | 0.931624 | 0.7413   |
| 347 | 0.717949 | 0.974359 | 0.931624 | 0.7413   |
| 348 | 0.74359  | 0.974359 | 0.935897 | 0.759257 |
| 349 | 0.74359  | 0.969231 | 0.931624 | 0.744851 |
| 350 | 0.74359  | 0.969231 | 0.931624 | 0.744851 |
| 351 | 0.74359  | 0.969231 | 0.931624 | 0.744851 |
| 352 | 0.74359  | 0.969231 | 0.931624 | 0.744851 |
| 353 | 0.74359  | 0.969231 | 0.931624 | 0.744851 |
| 354 | 0.74359  | 0.969231 | 0.931624 | 0.744851 |
| 355 | 0.74359  | 0.969231 | 0.931624 | 0.744851 |
| 356 | 0.74359  | 0.969231 | 0.931624 | 0.744851 |
| 357 | 0.74359  | 0.969231 | 0.931624 | 0.744851 |
| 358 | 0.74359  | 0.969231 | 0.931624 | 0.744851 |
| 359 | 0.74359  | 0.969231 | 0.931624 | 0.744851 |
| 360 | 0.74359  | 0.969231 | 0.931624 | 0.744851 |
| 361 | 0.74359  | 0.969231 | 0.931624 | 0.744851 |
| 362 | 0.74359  | 0.969231 | 0.931624 | 0.744851 |
| 363 | 0.74359  | 0.969231 | 0.931624 | 0.744851 |
| 364 | 0.74359  | 0.969231 | 0.931624 | 0.744851 |
| 365 | 0.74359  | 0.969231 | 0.931624 | 0.744851 |
| 366 | 0.74359  | 0.969231 | 0.931624 | 0.744851 |
| 367 | 0.74359  | 0.969231 | 0.931624 | 0.744851 |
| 368 | 0.74359  | 0.969231 | 0.931624 | 0.744851 |
| 369 | 0.74359  | 0.969231 | 0.931624 | 0.744851 |
| 370 | 0.74359  | 0.969231 | 0.931624 | 0.744851 |
| 371 | 0.74359  | 0.969231 | 0.931624 | 0.744851 |



|     |         |          |          |          |
|-----|---------|----------|----------|----------|
| 372 | 0.74359 | 0.969231 | 0.931624 | 0.744851 |
| 373 | 0.74359 | 0.969231 | 0.931624 | 0.744851 |
| 374 | 0.74359 | 0.969231 | 0.931624 | 0.744851 |
| 375 | 0.74359 | 0.969231 | 0.931624 | 0.744851 |
| 376 | 0.74359 | 0.969231 | 0.931624 | 0.744851 |
| 377 | 0.74359 | 0.969231 | 0.931624 | 0.744851 |
| 378 | 0.74359 | 0.969231 | 0.931624 | 0.744851 |
| 379 | 0.74359 | 0.969231 | 0.931624 | 0.744851 |
| 380 | 0.74359 | 0.969231 | 0.931624 | 0.744851 |
| 381 | 0.74359 | 0.969231 | 0.931624 | 0.744851 |
| 382 | 0.74359 | 0.969231 | 0.931624 | 0.744851 |
| 383 | 0.74359 | 0.969231 | 0.931624 | 0.744851 |
| 384 | 0.74359 | 0.969231 | 0.931624 | 0.744851 |
| 385 | 0.74359 | 0.969231 | 0.931624 | 0.744851 |
| 386 | 0.74359 | 0.969231 | 0.931624 | 0.744851 |
| 387 | 0.74359 | 0.969231 | 0.931624 | 0.744851 |
| 388 | 0.74359 | 0.969231 | 0.931624 | 0.744851 |
| 389 | 0.74359 | 0.974359 | 0.935897 | 0.759257 |
| 390 | 0.74359 | 0.974359 | 0.935897 | 0.759257 |
| 391 | 0.74359 | 0.974359 | 0.935897 | 0.759257 |
| 392 | 0.74359 | 0.974359 | 0.935897 | 0.759257 |
| 393 | 0.74359 | 0.974359 | 0.935897 | 0.759257 |
| 394 | 0.74359 | 0.969231 | 0.931624 | 0.744851 |
| 395 | 0.74359 | 0.969231 | 0.931624 | 0.744851 |
| 396 | 0.74359 | 0.969231 | 0.931624 | 0.744851 |
| 397 | 0.74359 | 0.969231 | 0.931624 | 0.744851 |
| 398 | 0.74359 | 0.969231 | 0.931624 | 0.744851 |
| 399 | 0.74359 | 0.969231 | 0.931624 | 0.744851 |
| 400 | 0.74359 | 0.969231 | 0.931624 | 0.744851 |
| 401 | 0.74359 | 0.969231 | 0.931624 | 0.744851 |
| 402 | 0.74359 | 0.969231 | 0.931624 | 0.744851 |
| 403 | 0.74359 | 0.969231 | 0.931624 | 0.744851 |
| 404 | 0.74359 | 0.969231 | 0.931624 | 0.744851 |
| 405 | 0.74359 | 0.969231 | 0.931624 | 0.744851 |
| 406 | 0.74359 | 0.969231 | 0.931624 | 0.744851 |
| 407 | 0.74359 | 0.969231 | 0.931624 | 0.744851 |
| 408 | 0.74359 | 0.969231 | 0.931624 | 0.744851 |
| 409 | 0.74359 | 0.969231 | 0.931624 | 0.744851 |
| 410 | 0.74359 | 0.969231 | 0.931624 | 0.744851 |
| 411 | 0.74359 | 0.969231 | 0.931624 | 0.744851 |
| 412 | 0.74359 | 0.964103 | 0.92735  | 0.730988 |
| 413 | 0.74359 | 0.964103 | 0.92735  | 0.730988 |
| 414 | 0.74359 | 0.964103 | 0.92735  | 0.730988 |

|     |         |          |          |          |
|-----|---------|----------|----------|----------|
| 415 | 0.74359 | 0.964103 | 0.92735  | 0.730988 |
| 416 | 0.74359 | 0.964103 | 0.92735  | 0.730988 |
| 417 | 0.74359 | 0.964103 | 0.92735  | 0.730988 |
| 418 | 0.74359 | 0.964103 | 0.92735  | 0.730988 |
| 419 | 0.74359 | 0.964103 | 0.92735  | 0.730988 |
| 420 | 0.74359 | 0.964103 | 0.92735  | 0.730988 |
| 421 | 0.74359 | 0.964103 | 0.92735  | 0.730988 |
| 422 | 0.74359 | 0.964103 | 0.92735  | 0.730988 |
| 423 | 0.74359 | 0.964103 | 0.92735  | 0.730988 |
| 424 | 0.74359 | 0.964103 | 0.92735  | 0.730988 |
| 425 | 0.74359 | 0.964103 | 0.92735  | 0.730988 |
| 426 | 0.74359 | 0.964103 | 0.92735  | 0.730988 |
| 427 | 0.74359 | 0.964103 | 0.92735  | 0.730988 |
| 428 | 0.74359 | 0.964103 | 0.92735  | 0.730988 |
| 429 | 0.74359 | 0.964103 | 0.92735  | 0.730988 |
| 430 | 0.74359 | 0.964103 | 0.92735  | 0.730988 |
| 431 | 0.74359 | 0.964103 | 0.92735  | 0.730988 |
| 432 | 0.74359 | 0.964103 | 0.92735  | 0.730988 |
| 433 | 0.74359 | 0.964103 | 0.92735  | 0.730988 |
| 434 | 0.74359 | 0.964103 | 0.92735  | 0.730988 |
| 435 | 0.74359 | 0.964103 | 0.92735  | 0.730988 |
| 436 | 0.74359 | 0.964103 | 0.92735  | 0.730988 |
| 437 | 0.74359 | 0.964103 | 0.92735  | 0.730988 |
| 438 | 0.74359 | 0.964103 | 0.92735  | 0.730988 |
| 439 | 0.74359 | 0.964103 | 0.92735  | 0.730988 |
| 440 | 0.74359 | 0.969231 | 0.931624 | 0.744851 |
| 441 | 0.74359 | 0.969231 | 0.931624 | 0.744851 |
| 442 | 0.74359 | 0.969231 | 0.931624 | 0.744851 |
| 443 | 0.74359 | 0.969231 | 0.931624 | 0.744851 |
| 444 | 0.74359 | 0.969231 | 0.931624 | 0.744851 |
| 445 | 0.74359 | 0.969231 | 0.931624 | 0.744851 |
| 446 | 0.74359 | 0.969231 | 0.931624 | 0.744851 |
| 447 | 0.74359 | 0.969231 | 0.931624 | 0.744851 |
| 448 | 0.74359 | 0.969231 | 0.931624 | 0.744851 |
| 449 | 0.74359 | 0.969231 | 0.931624 | 0.744851 |
| 450 | 0.74359 | 0.964103 | 0.92735  | 0.730988 |
| 451 | 0.74359 | 0.958974 | 0.923077 | 0.717632 |
| 452 | 0.74359 | 0.958974 | 0.923077 | 0.717632 |
| 453 | 0.74359 | 0.958974 | 0.923077 | 0.717632 |
| 454 | 0.74359 | 0.958974 | 0.923077 | 0.717632 |
| 455 | 0.74359 | 0.958974 | 0.923077 | 0.717632 |
| 456 | 0.74359 | 0.958974 | 0.923077 | 0.717632 |
| 457 | 0.74359 | 0.958974 | 0.923077 | 0.717632 |

|     |          |          |          |          |
|-----|----------|----------|----------|----------|
| 458 | 0.74359  | 0.958974 | 0.923077 | 0.717632 |
| 459 | 0.74359  | 0.964103 | 0.92735  | 0.730988 |
| 460 | 0.74359  | 0.964103 | 0.92735  | 0.730988 |
| 461 | 0.74359  | 0.964103 | 0.92735  | 0.730988 |
| 462 | 0.74359  | 0.958974 | 0.923077 | 0.717632 |
| 463 | 0.74359  | 0.958974 | 0.923077 | 0.717632 |
| 464 | 0.74359  | 0.958974 | 0.923077 | 0.717632 |
| 465 | 0.74359  | 0.958974 | 0.923077 | 0.717632 |
| 466 | 0.74359  | 0.964103 | 0.92735  | 0.730988 |
| 467 | 0.74359  | 0.964103 | 0.92735  | 0.730988 |
| 468 | 0.74359  | 0.964103 | 0.92735  | 0.730988 |
| 469 | 0.74359  | 0.964103 | 0.92735  | 0.730988 |
| 470 | 0.74359  | 0.964103 | 0.92735  | 0.730988 |
| 471 | 0.74359  | 0.964103 | 0.92735  | 0.730988 |
| 472 | 0.74359  | 0.964103 | 0.92735  | 0.730988 |
| 473 | 0.74359  | 0.964103 | 0.92735  | 0.730988 |
| 474 | 0.74359  | 0.964103 | 0.92735  | 0.730988 |
| 475 | 0.74359  | 0.964103 | 0.92735  | 0.730988 |
| 476 | 0.74359  | 0.964103 | 0.92735  | 0.730988 |
| 477 | 0.74359  | 0.964103 | 0.92735  | 0.730988 |
| 478 | 0.74359  | 0.964103 | 0.92735  | 0.730988 |
| 479 | 0.74359  | 0.964103 | 0.92735  | 0.730988 |
| 480 | 0.74359  | 0.964103 | 0.92735  | 0.730988 |
| 481 | 0.74359  | 0.964103 | 0.92735  | 0.730988 |
| 482 | 0.74359  | 0.964103 | 0.92735  | 0.730988 |
| 483 | 0.74359  | 0.964103 | 0.92735  | 0.730988 |
| 484 | 0.74359  | 0.964103 | 0.92735  | 0.730988 |
| 485 | 0.74359  | 0.964103 | 0.92735  | 0.730988 |
| 486 | 0.74359  | 0.964103 | 0.92735  | 0.730988 |
| 487 | 0.74359  | 0.964103 | 0.92735  | 0.730988 |
| 488 | 0.74359  | 0.964103 | 0.92735  | 0.730988 |
| 489 | 0.74359  | 0.964103 | 0.92735  | 0.730988 |
| 490 | 0.717949 | 0.964103 | 0.923077 | 0.712699 |
| 491 | 0.717949 | 0.964103 | 0.923077 | 0.712699 |
| 492 | 0.717949 | 0.964103 | 0.923077 | 0.712699 |
| 493 | 0.717949 | 0.964103 | 0.923077 | 0.712699 |
| 494 | 0.692308 | 0.969231 | 0.923077 | 0.708353 |
| 495 | 0.717949 | 0.969231 | 0.92735  | 0.726717 |
| 496 | 0.717949 | 0.969231 | 0.92735  | 0.726717 |
| 497 | 0.717949 | 0.969231 | 0.92735  | 0.726717 |
| 498 | 0.717949 | 0.969231 | 0.92735  | 0.726717 |
| 499 | 0.717949 | 0.969231 | 0.92735  | 0.726717 |
| 500 | 0.717949 | 0.969231 | 0.92735  | 0.726717 |

(4) Dataset  $D_4$ 

| Number of features | SN       | SP       | ACC      | MCC      |
|--------------------|----------|----------|----------|----------|
| 4                  | 0.487179 | 0.989744 | 0.905983 | 0.621868 |
| 5                  | 0.461538 | 0.989744 | 0.901709 | 0.601556 |
| 6                  | 0.461538 | 0.984615 | 0.897436 | 0.581748 |
| 7                  | 0.487179 | 0.984615 | 0.901709 | 0.602454 |
| 8                  | 0.487179 | 0.984615 | 0.901709 | 0.602454 |
| 9                  | 0.512821 | 0.984615 | 0.905983 | 0.622704 |
| 10                 | 0.538462 | 0.984615 | 0.910256 | 0.64254  |
| 11                 | 0.564103 | 0.984615 | 0.91453  | 0.661996 |
| 12                 | 0.564103 | 0.984615 | 0.91453  | 0.661996 |
| 13                 | 0.589744 | 0.984615 | 0.918803 | 0.681106 |
| 14                 | 0.564103 | 0.984615 | 0.91453  | 0.661996 |
| 15                 | 0.589744 | 0.984615 | 0.918803 | 0.681106 |
| 16                 | 0.589744 | 0.984615 | 0.918803 | 0.681106 |
| 17                 | 0.589744 | 0.984615 | 0.918803 | 0.681106 |
| 18                 | 0.564103 | 0.984615 | 0.91453  | 0.661996 |
| 19                 | 0.564103 | 0.984615 | 0.91453  | 0.661996 |
| 20                 | 0.538462 | 0.984615 | 0.910256 | 0.64254  |
| 21                 | 0.564103 | 0.979487 | 0.910256 | 0.644618 |
| 22                 | 0.564103 | 0.979487 | 0.910256 | 0.644618 |
| 23                 | 0.564103 | 0.984615 | 0.91453  | 0.661996 |
| 24                 | 0.564103 | 0.984615 | 0.91453  | 0.661996 |
| 25                 | 0.564103 | 0.984615 | 0.91453  | 0.661996 |
| 26                 | 0.564103 | 0.984615 | 0.91453  | 0.661996 |
| 27                 | 0.564103 | 0.984615 | 0.91453  | 0.661996 |
| 28                 | 0.564103 | 0.984615 | 0.91453  | 0.661996 |
| 29                 | 0.564103 | 0.984615 | 0.91453  | 0.661996 |
| 30                 | 0.564103 | 0.984615 | 0.91453  | 0.661996 |
| 31                 | 0.564103 | 0.984615 | 0.91453  | 0.661996 |
| 32                 | 0.589744 | 0.984615 | 0.918803 | 0.681106 |
| 33                 | 0.589744 | 0.984615 | 0.918803 | 0.681106 |
| 34                 | 0.589744 | 0.984615 | 0.918803 | 0.681106 |
| 35                 | 0.589744 | 0.984615 | 0.918803 | 0.681106 |
| 36                 | 0.589744 | 0.984615 | 0.918803 | 0.681106 |
| 37                 | 0.615385 | 0.979487 | 0.918803 | 0.683062 |
| 38                 | 0.615385 | 0.974359 | 0.91453  | 0.667017 |
| 39                 | 0.641026 | 0.979487 | 0.923077 | 0.701818 |
| 40                 | 0.641026 | 0.979487 | 0.923077 | 0.701818 |
| 41                 | 0.641026 | 0.984615 | 0.92735  | 0.718393 |
| 42                 | 0.641026 | 0.984615 | 0.92735  | 0.718393 |
| 43                 | 0.641026 | 0.984615 | 0.92735  | 0.718393 |

|    |          |          |          |          |
|----|----------|----------|----------|----------|
| 44 | 0.641026 | 0.979487 | 0.923077 | 0.701818 |
| 45 | 0.666667 | 0.979487 | 0.92735  | 0.720294 |
| 46 | 0.692308 | 0.984615 | 0.935897 | 0.754594 |
| 47 | 0.692308 | 0.984615 | 0.935897 | 0.754594 |
| 48 | 0.666667 | 0.984615 | 0.931624 | 0.736619 |
| 49 | 0.666667 | 0.984615 | 0.931624 | 0.736619 |
| 50 | 0.666667 | 0.984615 | 0.931624 | 0.736619 |
| 51 | 0.666667 | 0.989744 | 0.935897 | 0.753724 |
| 52 | 0.666667 | 0.989744 | 0.935897 | 0.753724 |
| 53 | 0.666667 | 0.989744 | 0.935897 | 0.753724 |
| 54 | 0.666667 | 0.989744 | 0.935897 | 0.753724 |
| 55 | 0.666667 | 0.989744 | 0.935897 | 0.753724 |
| 56 | 0.666667 | 0.989744 | 0.935897 | 0.753724 |
| 57 | 0.692308 | 0.989744 | 0.940171 | 0.77142  |
| 58 | 0.692308 | 0.989744 | 0.940171 | 0.77142  |
| 59 | 0.692308 | 0.989744 | 0.940171 | 0.77142  |
| 60 | 0.692308 | 0.989744 | 0.940171 | 0.77142  |
| 61 | 0.692308 | 0.989744 | 0.940171 | 0.77142  |
| 62 | 0.692308 | 0.979487 | 0.931624 | 0.738512 |
| 63 | 0.692308 | 0.979487 | 0.931624 | 0.738512 |
| 64 | 0.692308 | 0.979487 | 0.931624 | 0.738512 |
| 65 | 0.692308 | 0.979487 | 0.931624 | 0.738512 |
| 66 | 0.666667 | 0.984615 | 0.931624 | 0.736619 |
| 67 | 0.666667 | 0.984615 | 0.931624 | 0.736619 |
| 68 | 0.641026 | 0.979487 | 0.923077 | 0.701818 |
| 69 | 0.641026 | 0.979487 | 0.923077 | 0.701818 |
| 70 | 0.641026 | 0.979487 | 0.923077 | 0.701818 |
| 71 | 0.666667 | 0.979487 | 0.92735  | 0.720294 |
| 72 | 0.641026 | 0.979487 | 0.923077 | 0.701818 |
| 73 | 0.641026 | 0.979487 | 0.923077 | 0.701818 |
| 74 | 0.641026 | 0.979487 | 0.923077 | 0.701818 |
| 75 | 0.641026 | 0.984615 | 0.92735  | 0.718393 |
| 76 | 0.641026 | 0.984615 | 0.92735  | 0.718393 |
| 77 | 0.641026 | 0.979487 | 0.923077 | 0.701818 |
| 78 | 0.641026 | 0.984615 | 0.92735  | 0.718393 |
| 79 | 0.641026 | 0.984615 | 0.92735  | 0.718393 |
| 80 | 0.641026 | 0.974359 | 0.918803 | 0.685994 |
| 81 | 0.641026 | 0.979487 | 0.923077 | 0.701818 |
| 82 | 0.641026 | 0.979487 | 0.923077 | 0.701818 |
| 83 | 0.615385 | 0.969231 | 0.910256 | 0.651695 |
| 84 | 0.641026 | 0.969231 | 0.91453  | 0.670862 |
| 85 | 0.692308 | 0.984615 | 0.935897 | 0.754594 |
| 86 | 0.692308 | 0.984615 | 0.935897 | 0.754594 |

|     |          |          |          |          |
|-----|----------|----------|----------|----------|
| 87  | 0.692308 | 0.984615 | 0.935897 | 0.754594 |
| 88  | 0.692308 | 0.984615 | 0.935897 | 0.754594 |
| 89  | 0.692308 | 0.984615 | 0.935897 | 0.754594 |
| 90  | 0.692308 | 0.984615 | 0.935897 | 0.754594 |
| 91  | 0.666667 | 0.984615 | 0.931624 | 0.736619 |
| 92  | 0.666667 | 0.979487 | 0.92735  | 0.720294 |
| 93  | 0.666667 | 0.984615 | 0.931624 | 0.736619 |
| 94  | 0.666667 | 0.984615 | 0.931624 | 0.736619 |
| 95  | 0.666667 | 0.979487 | 0.92735  | 0.720294 |
| 96  | 0.666667 | 0.979487 | 0.92735  | 0.720294 |
| 97  | 0.666667 | 0.984615 | 0.931624 | 0.736619 |
| 98  | 0.666667 | 0.984615 | 0.931624 | 0.736619 |
| 99  | 0.666667 | 0.979487 | 0.92735  | 0.720294 |
| 100 | 0.641026 | 0.979487 | 0.923077 | 0.701818 |
| 101 | 0.666667 | 0.979487 | 0.92735  | 0.720294 |
| 102 | 0.641026 | 0.969231 | 0.91453  | 0.670862 |
| 103 | 0.641026 | 0.969231 | 0.91453  | 0.670862 |
| 104 | 0.641026 | 0.969231 | 0.91453  | 0.670862 |
| 105 | 0.615385 | 0.969231 | 0.910256 | 0.651695 |
| 106 | 0.641026 | 0.969231 | 0.91453  | 0.670862 |
| 107 | 0.615385 | 0.969231 | 0.910256 | 0.651695 |
| 108 | 0.666667 | 0.969231 | 0.918803 | 0.689741 |
| 109 | 0.641026 | 0.969231 | 0.91453  | 0.670862 |
| 110 | 0.641026 | 0.969231 | 0.91453  | 0.670862 |
| 111 | 0.641026 | 0.969231 | 0.91453  | 0.670862 |
| 112 | 0.641026 | 0.969231 | 0.91453  | 0.670862 |
| 113 | 0.589744 | 0.969231 | 0.905983 | 0.632216 |
| 114 | 0.615385 | 0.969231 | 0.910256 | 0.651695 |
| 115 | 0.589744 | 0.974359 | 0.910256 | 0.647732 |
| 116 | 0.615385 | 0.969231 | 0.910256 | 0.651695 |
| 117 | 0.615385 | 0.969231 | 0.910256 | 0.651695 |
| 118 | 0.641026 | 0.969231 | 0.91453  | 0.670862 |
| 119 | 0.641026 | 0.974359 | 0.918803 | 0.685994 |
| 120 | 0.641026 | 0.974359 | 0.918803 | 0.685994 |
| 121 | 0.641026 | 0.974359 | 0.918803 | 0.685994 |
| 122 | 0.641026 | 0.974359 | 0.918803 | 0.685994 |
| 123 | 0.641026 | 0.974359 | 0.918803 | 0.685994 |
| 124 | 0.641026 | 0.974359 | 0.918803 | 0.685994 |
| 125 | 0.641026 | 0.974359 | 0.918803 | 0.685994 |
| 126 | 0.641026 | 0.974359 | 0.918803 | 0.685994 |
| 127 | 0.666667 | 0.979487 | 0.92735  | 0.720294 |
| 128 | 0.666667 | 0.979487 | 0.92735  | 0.720294 |
| 129 | 0.666667 | 0.979487 | 0.92735  | 0.720294 |

|     |          |          |          |          |
|-----|----------|----------|----------|----------|
| 130 | 0.666667 | 0.979487 | 0.92735  | 0.720294 |
| 131 | 0.666667 | 0.974359 | 0.923077 | 0.704687 |
| 132 | 0.641026 | 0.974359 | 0.918803 | 0.685994 |
| 133 | 0.641026 | 0.974359 | 0.918803 | 0.685994 |
| 134 | 0.666667 | 0.974359 | 0.923077 | 0.704687 |
| 135 | 0.666667 | 0.979487 | 0.92735  | 0.720294 |
| 136 | 0.666667 | 0.979487 | 0.92735  | 0.720294 |
| 137 | 0.666667 | 0.979487 | 0.92735  | 0.720294 |
| 138 | 0.666667 | 0.979487 | 0.92735  | 0.720294 |
| 139 | 0.641026 | 0.979487 | 0.923077 | 0.701818 |
| 140 | 0.641026 | 0.979487 | 0.923077 | 0.701818 |
| 141 | 0.641026 | 0.979487 | 0.923077 | 0.701818 |
| 142 | 0.641026 | 0.979487 | 0.923077 | 0.701818 |
| 143 | 0.641026 | 0.979487 | 0.923077 | 0.701818 |
| 144 | 0.641026 | 0.974359 | 0.918803 | 0.685994 |
| 145 | 0.641026 | 0.974359 | 0.918803 | 0.685994 |
| 146 | 0.641026 | 0.974359 | 0.918803 | 0.685994 |
| 147 | 0.615385 | 0.979487 | 0.918803 | 0.683062 |
| 148 | 0.641026 | 0.979487 | 0.923077 | 0.701818 |
| 149 | 0.641026 | 0.979487 | 0.923077 | 0.701818 |
| 150 | 0.641026 | 0.979487 | 0.923077 | 0.701818 |
| 151 | 0.641026 | 0.979487 | 0.923077 | 0.701818 |
| 152 | 0.666667 | 0.979487 | 0.92735  | 0.720294 |
| 153 | 0.641026 | 0.979487 | 0.923077 | 0.701818 |
| 154 | 0.641026 | 0.979487 | 0.923077 | 0.701818 |
| 155 | 0.641026 | 0.979487 | 0.923077 | 0.701818 |
| 156 | 0.641026 | 0.974359 | 0.918803 | 0.685994 |
| 157 | 0.641026 | 0.979487 | 0.923077 | 0.701818 |
| 158 | 0.641026 | 0.979487 | 0.923077 | 0.701818 |
| 159 | 0.641026 | 0.979487 | 0.923077 | 0.701818 |
| 160 | 0.641026 | 0.979487 | 0.923077 | 0.701818 |
| 161 | 0.641026 | 0.979487 | 0.923077 | 0.701818 |
| 162 | 0.641026 | 0.979487 | 0.923077 | 0.701818 |
| 163 | 0.641026 | 0.979487 | 0.923077 | 0.701818 |
| 164 | 0.641026 | 0.979487 | 0.923077 | 0.701818 |
| 165 | 0.641026 | 0.979487 | 0.923077 | 0.701818 |
| 166 | 0.641026 | 0.979487 | 0.923077 | 0.701818 |
| 167 | 0.641026 | 0.979487 | 0.923077 | 0.701818 |
| 168 | 0.641026 | 0.974359 | 0.918803 | 0.685994 |
| 169 | 0.641026 | 0.974359 | 0.918803 | 0.685994 |
| 170 | 0.641026 | 0.974359 | 0.918803 | 0.685994 |
| 171 | 0.641026 | 0.974359 | 0.918803 | 0.685994 |
| 172 | 0.641026 | 0.974359 | 0.918803 | 0.685994 |

|     |          |          |          |          |
|-----|----------|----------|----------|----------|
| 173 | 0.641026 | 0.974359 | 0.918803 | 0.685994 |
| 174 | 0.641026 | 0.974359 | 0.918803 | 0.685994 |
| 175 | 0.641026 | 0.969231 | 0.91453  | 0.670862 |
| 176 | 0.641026 | 0.969231 | 0.91453  | 0.670862 |
| 177 | 0.641026 | 0.969231 | 0.91453  | 0.670862 |
| 178 | 0.641026 | 0.969231 | 0.91453  | 0.670862 |
| 179 | 0.641026 | 0.964103 | 0.910256 | 0.656366 |
| 180 | 0.641026 | 0.964103 | 0.910256 | 0.656366 |
| 181 | 0.641026 | 0.964103 | 0.910256 | 0.656366 |
| 182 | 0.641026 | 0.958974 | 0.905983 | 0.64246  |
| 183 | 0.641026 | 0.958974 | 0.905983 | 0.64246  |
| 184 | 0.641026 | 0.958974 | 0.905983 | 0.64246  |
| 185 | 0.641026 | 0.958974 | 0.905983 | 0.64246  |
| 186 | 0.641026 | 0.958974 | 0.905983 | 0.64246  |
| 187 | 0.641026 | 0.958974 | 0.905983 | 0.64246  |
| 188 | 0.641026 | 0.958974 | 0.905983 | 0.64246  |
| 189 | 0.666667 | 0.958974 | 0.910256 | 0.661638 |
| 190 | 0.641026 | 0.953846 | 0.901709 | 0.629098 |
| 191 | 0.641026 | 0.953846 | 0.901709 | 0.629098 |
| 192 | 0.641026 | 0.958974 | 0.905983 | 0.64246  |
| 193 | 0.641026 | 0.958974 | 0.905983 | 0.64246  |
| 194 | 0.641026 | 0.958974 | 0.905983 | 0.64246  |
| 195 | 0.641026 | 0.958974 | 0.905983 | 0.64246  |
| 196 | 0.641026 | 0.958974 | 0.905983 | 0.64246  |
| 197 | 0.641026 | 0.958974 | 0.905983 | 0.64246  |
| 198 | 0.641026 | 0.958974 | 0.905983 | 0.64246  |
| 199 | 0.641026 | 0.958974 | 0.905983 | 0.64246  |
| 200 | 0.666667 | 0.958974 | 0.910256 | 0.661638 |
| 201 | 0.666667 | 0.964103 | 0.91453  | 0.675406 |
| 202 | 0.666667 | 0.958974 | 0.910256 | 0.661638 |
| 203 | 0.641026 | 0.948718 | 0.897436 | 0.616243 |
| 204 | 0.641026 | 0.938462 | 0.888889 | 0.591915 |
| 205 | 0.641026 | 0.938462 | 0.888889 | 0.591915 |
| 206 | 0.641026 | 0.938462 | 0.888889 | 0.591915 |
| 207 | 0.641026 | 0.938462 | 0.888889 | 0.591915 |
| 208 | 0.641026 | 0.933333 | 0.884615 | 0.580381 |
| 209 | 0.641026 | 0.948718 | 0.897436 | 0.616243 |
| 210 | 0.641026 | 0.948718 | 0.897436 | 0.616243 |
| 211 | 0.641026 | 0.948718 | 0.897436 | 0.616243 |
| 212 | 0.641026 | 0.953846 | 0.901709 | 0.629098 |
| 213 | 0.641026 | 0.948718 | 0.897436 | 0.616243 |
| 214 | 0.641026 | 0.94359  | 0.893162 | 0.60386  |
| 215 | 0.641026 | 0.94359  | 0.893162 | 0.60386  |



|     |          |          |          |          |
|-----|----------|----------|----------|----------|
| 216 | 0.641026 | 0.948718 | 0.897436 | 0.616243 |
| 217 | 0.641026 | 0.948718 | 0.897436 | 0.616243 |
| 218 | 0.641026 | 0.948718 | 0.897436 | 0.616243 |
| 219 | 0.615385 | 0.948718 | 0.893162 | 0.596559 |
| 220 | 0.615385 | 0.948718 | 0.893162 | 0.596559 |
| 221 | 0.615385 | 0.953846 | 0.897436 | 0.609513 |
| 222 | 0.615385 | 0.953846 | 0.897436 | 0.609513 |
| 223 | 0.615385 | 0.953846 | 0.897436 | 0.609513 |
| 224 | 0.641026 | 0.953846 | 0.901709 | 0.629098 |
| 225 | 0.641026 | 0.953846 | 0.901709 | 0.629098 |
| 226 | 0.641026 | 0.953846 | 0.901709 | 0.629098 |
| 227 | 0.615385 | 0.953846 | 0.897436 | 0.609513 |
| 228 | 0.615385 | 0.948718 | 0.893162 | 0.596559 |
| 229 | 0.615385 | 0.948718 | 0.893162 | 0.596559 |
| 230 | 0.615385 | 0.948718 | 0.893162 | 0.596559 |
| 231 | 0.615385 | 0.948718 | 0.893162 | 0.596559 |
| 232 | 0.615385 | 0.948718 | 0.893162 | 0.596559 |
| 233 | 0.615385 | 0.948718 | 0.893162 | 0.596559 |
| 234 | 0.615385 | 0.948718 | 0.893162 | 0.596559 |
| 235 | 0.615385 | 0.948718 | 0.893162 | 0.596559 |
| 236 | 0.615385 | 0.948718 | 0.893162 | 0.596559 |
| 237 | 0.615385 | 0.948718 | 0.893162 | 0.596559 |
| 238 | 0.615385 | 0.953846 | 0.897436 | 0.609513 |
| 239 | 0.589744 | 0.953846 | 0.893162 | 0.589617 |
| 240 | 0.589744 | 0.948718 | 0.888889 | 0.576566 |
| 241 | 0.589744 | 0.948718 | 0.888889 | 0.576566 |
| 242 | 0.589744 | 0.948718 | 0.888889 | 0.576566 |
| 243 | 0.589744 | 0.948718 | 0.888889 | 0.576566 |
| 244 | 0.589744 | 0.953846 | 0.893162 | 0.589617 |
| 245 | 0.589744 | 0.953846 | 0.893162 | 0.589617 |
| 246 | 0.615385 | 0.953846 | 0.897436 | 0.609513 |
| 247 | 0.615385 | 0.953846 | 0.897436 | 0.609513 |
| 248 | 0.615385 | 0.953846 | 0.897436 | 0.609513 |
| 249 | 0.589744 | 0.948718 | 0.888889 | 0.576566 |
| 250 | 0.589744 | 0.948718 | 0.888889 | 0.576566 |
| 251 | 0.589744 | 0.948718 | 0.888889 | 0.576566 |
| 252 | 0.589744 | 0.948718 | 0.888889 | 0.576566 |
| 253 | 0.589744 | 0.948718 | 0.888889 | 0.576566 |
| 254 | 0.615385 | 0.948718 | 0.893162 | 0.596559 |
| 255 | 0.615385 | 0.948718 | 0.893162 | 0.596559 |
| 256 | 0.641026 | 0.948718 | 0.897436 | 0.616243 |
| 257 | 0.615385 | 0.94359  | 0.888889 | 0.584092 |
| 258 | 0.641026 | 0.938462 | 0.888889 | 0.591915 |

|     |          |          |          |          |
|-----|----------|----------|----------|----------|
| 259 | 0.641026 | 0.938462 | 0.888889 | 0.591915 |
| 260 | 0.641026 | 0.938462 | 0.888889 | 0.591915 |
| 261 | 0.641026 | 0.938462 | 0.888889 | 0.591915 |
| 262 | 0.641026 | 0.938462 | 0.888889 | 0.591915 |
| 263 | 0.641026 | 0.938462 | 0.888889 | 0.591915 |
| 264 | 0.666667 | 0.938462 | 0.893162 | 0.611473 |
| 265 | 0.641026 | 0.938462 | 0.888889 | 0.591915 |
| 266 | 0.641026 | 0.938462 | 0.888889 | 0.591915 |
| 267 | 0.641026 | 0.938462 | 0.888889 | 0.591915 |
| 268 | 0.615385 | 0.938462 | 0.884615 | 0.572078 |
| 269 | 0.615385 | 0.938462 | 0.884615 | 0.572078 |
| 270 | 0.615385 | 0.938462 | 0.884615 | 0.572078 |
| 271 | 0.615385 | 0.938462 | 0.884615 | 0.572078 |
| 272 | 0.615385 | 0.933333 | 0.880342 | 0.560486 |
| 273 | 0.615385 | 0.933333 | 0.880342 | 0.560486 |
| 274 | 0.615385 | 0.938462 | 0.884615 | 0.572078 |
| 275 | 0.615385 | 0.938462 | 0.884615 | 0.572078 |
| 276 | 0.615385 | 0.938462 | 0.884615 | 0.572078 |
| 277 | 0.615385 | 0.938462 | 0.884615 | 0.572078 |
| 278 | 0.641026 | 0.938462 | 0.888889 | 0.591915 |
| 279 | 0.692308 | 0.953846 | 0.910256 | 0.667424 |
| 280 | 0.692308 | 0.948718 | 0.905983 | 0.654773 |
| 281 | 0.692308 | 0.948718 | 0.905983 | 0.654773 |
| 282 | 0.692308 | 0.948718 | 0.905983 | 0.654773 |
| 283 | 0.692308 | 0.948718 | 0.905983 | 0.654773 |
| 284 | 0.692308 | 0.948718 | 0.905983 | 0.654773 |
| 285 | 0.692308 | 0.948718 | 0.905983 | 0.654773 |
| 286 | 0.692308 | 0.94359  | 0.901709 | 0.642565 |
| 287 | 0.692308 | 0.94359  | 0.901709 | 0.642565 |
| 288 | 0.692308 | 0.948718 | 0.905983 | 0.654773 |
| 289 | 0.692308 | 0.94359  | 0.901709 | 0.642565 |
| 290 | 0.692308 | 0.948718 | 0.905983 | 0.654773 |
| 291 | 0.692308 | 0.948718 | 0.905983 | 0.654773 |
| 292 | 0.692308 | 0.948718 | 0.905983 | 0.654773 |
| 293 | 0.692308 | 0.948718 | 0.905983 | 0.654773 |
| 294 | 0.692308 | 0.948718 | 0.905983 | 0.654773 |
| 295 | 0.692308 | 0.953846 | 0.910256 | 0.667424 |
| 296 | 0.692308 | 0.953846 | 0.910256 | 0.667424 |
| 297 | 0.692308 | 0.953846 | 0.910256 | 0.667424 |
| 298 | 0.692308 | 0.953846 | 0.910256 | 0.667424 |
| 299 | 0.717949 | 0.953846 | 0.91453  | 0.686203 |
| 300 | 0.692308 | 0.948718 | 0.905983 | 0.654773 |
| 301 | 0.692308 | 0.948718 | 0.905983 | 0.654773 |

|     |          |          |          |          |
|-----|----------|----------|----------|----------|
| 302 | 0.692308 | 0.948718 | 0.905983 | 0.654773 |
| 303 | 0.692308 | 0.948718 | 0.905983 | 0.654773 |
| 304 | 0.692308 | 0.948718 | 0.905983 | 0.654773 |
| 305 | 0.692308 | 0.948718 | 0.905983 | 0.654773 |
| 306 | 0.692308 | 0.948718 | 0.905983 | 0.654773 |
| 307 | 0.692308 | 0.953846 | 0.910256 | 0.667424 |
| 308 | 0.692308 | 0.953846 | 0.910256 | 0.667424 |
| 309 | 0.692308 | 0.953846 | 0.910256 | 0.667424 |
| 310 | 0.692308 | 0.953846 | 0.910256 | 0.667424 |
| 311 | 0.692308 | 0.953846 | 0.910256 | 0.667424 |
| 312 | 0.692308 | 0.948718 | 0.905983 | 0.654773 |
| 313 | 0.692308 | 0.953846 | 0.910256 | 0.667424 |
| 314 | 0.666667 | 0.948718 | 0.901709 | 0.635642 |
| 315 | 0.666667 | 0.948718 | 0.901709 | 0.635642 |
| 316 | 0.666667 | 0.953846 | 0.905983 | 0.648395 |
| 317 | 0.666667 | 0.953846 | 0.905983 | 0.648395 |
| 318 | 0.666667 | 0.953846 | 0.905983 | 0.648395 |
| 319 | 0.666667 | 0.948718 | 0.901709 | 0.635642 |
| 320 | 0.666667 | 0.948718 | 0.901709 | 0.635642 |
| 321 | 0.666667 | 0.948718 | 0.901709 | 0.635642 |
| 322 | 0.666667 | 0.948718 | 0.901709 | 0.635642 |
| 323 | 0.666667 | 0.948718 | 0.901709 | 0.635642 |
| 324 | 0.666667 | 0.948718 | 0.901709 | 0.635642 |
| 325 | 0.666667 | 0.948718 | 0.901709 | 0.635642 |
| 326 | 0.666667 | 0.948718 | 0.901709 | 0.635642 |
| 327 | 0.666667 | 0.948718 | 0.901709 | 0.635642 |
| 328 | 0.666667 | 0.948718 | 0.901709 | 0.635642 |
| 329 | 0.666667 | 0.948718 | 0.901709 | 0.635642 |
| 330 | 0.666667 | 0.948718 | 0.901709 | 0.635642 |
| 331 | 0.666667 | 0.948718 | 0.901709 | 0.635642 |
| 332 | 0.666667 | 0.948718 | 0.901709 | 0.635642 |
| 333 | 0.666667 | 0.948718 | 0.901709 | 0.635642 |
| 334 | 0.666667 | 0.948718 | 0.901709 | 0.635642 |
| 335 | 0.666667 | 0.948718 | 0.901709 | 0.635642 |
| 336 | 0.666667 | 0.948718 | 0.901709 | 0.635642 |
| 337 | 0.641026 | 0.953846 | 0.901709 | 0.629098 |
| 338 | 0.641026 | 0.953846 | 0.901709 | 0.629098 |
| 339 | 0.641026 | 0.953846 | 0.901709 | 0.629098 |
| 340 | 0.641026 | 0.953846 | 0.901709 | 0.629098 |
| 341 | 0.641026 | 0.953846 | 0.901709 | 0.629098 |
| 342 | 0.615385 | 0.953846 | 0.897436 | 0.609513 |
| 343 | 0.615385 | 0.953846 | 0.897436 | 0.609513 |
| 344 | 0.615385 | 0.948718 | 0.893162 | 0.596559 |

|     |          |          |          |          |
|-----|----------|----------|----------|----------|
| 345 | 0.615385 | 0.94359  | 0.888889 | 0.584092 |
| 346 | 0.615385 | 0.94359  | 0.888889 | 0.584092 |
| 347 | 0.589744 | 0.933333 | 0.876068 | 0.540295 |
| 348 | 0.589744 | 0.933333 | 0.876068 | 0.540295 |
| 349 | 0.589744 | 0.933333 | 0.876068 | 0.540295 |
| 350 | 0.589744 | 0.933333 | 0.876068 | 0.540295 |
| 351 | 0.589744 | 0.933333 | 0.876068 | 0.540295 |
| 352 | 0.589744 | 0.933333 | 0.876068 | 0.540295 |
| 353 | 0.589744 | 0.933333 | 0.876068 | 0.540295 |
| 354 | 0.589744 | 0.933333 | 0.876068 | 0.540295 |
| 355 | 0.589744 | 0.933333 | 0.876068 | 0.540295 |
| 356 | 0.589744 | 0.933333 | 0.876068 | 0.540295 |
| 357 | 0.589744 | 0.933333 | 0.876068 | 0.540295 |
| 358 | 0.589744 | 0.933333 | 0.876068 | 0.540295 |
| 359 | 0.589744 | 0.933333 | 0.876068 | 0.540295 |
| 360 | 0.589744 | 0.933333 | 0.876068 | 0.540295 |
| 361 | 0.589744 | 0.933333 | 0.876068 | 0.540295 |
| 362 | 0.589744 | 0.933333 | 0.876068 | 0.540295 |
| 363 | 0.589744 | 0.933333 | 0.876068 | 0.540295 |
| 364 | 0.589744 | 0.933333 | 0.876068 | 0.540295 |
| 365 | 0.589744 | 0.933333 | 0.876068 | 0.540295 |
| 366 | 0.589744 | 0.933333 | 0.876068 | 0.540295 |
| 367 | 0.589744 | 0.933333 | 0.876068 | 0.540295 |
| 368 | 0.589744 | 0.933333 | 0.876068 | 0.540295 |
| 369 | 0.589744 | 0.933333 | 0.876068 | 0.540295 |
| 370 | 0.589744 | 0.933333 | 0.876068 | 0.540295 |
| 371 | 0.589744 | 0.933333 | 0.876068 | 0.540295 |
| 372 | 0.589744 | 0.933333 | 0.876068 | 0.540295 |
| 373 | 0.589744 | 0.933333 | 0.876068 | 0.540295 |
| 374 | 0.589744 | 0.933333 | 0.876068 | 0.540295 |
| 375 | 0.589744 | 0.928205 | 0.871795 | 0.529057 |
| 376 | 0.589744 | 0.928205 | 0.871795 | 0.529057 |
| 377 | 0.589744 | 0.928205 | 0.871795 | 0.529057 |
| 378 | 0.589744 | 0.928205 | 0.871795 | 0.529057 |
| 379 | 0.589744 | 0.928205 | 0.871795 | 0.529057 |
| 380 | 0.589744 | 0.928205 | 0.871795 | 0.529057 |
| 381 | 0.589744 | 0.928205 | 0.871795 | 0.529057 |
| 382 | 0.589744 | 0.928205 | 0.871795 | 0.529057 |
| 383 | 0.589744 | 0.933333 | 0.876068 | 0.540295 |
| 384 | 0.589744 | 0.923077 | 0.867521 | 0.518197 |
| 385 | 0.589744 | 0.923077 | 0.867521 | 0.518197 |
| 386 | 0.589744 | 0.928205 | 0.871795 | 0.529057 |
| 387 | 0.589744 | 0.928205 | 0.871795 | 0.529057 |

|     |          |          |          |          |
|-----|----------|----------|----------|----------|
| 388 | 0.589744 | 0.923077 | 0.867521 | 0.518197 |
| 389 | 0.615385 | 0.928205 | 0.876068 | 0.549289 |
| 390 | 0.615385 | 0.928205 | 0.876068 | 0.549289 |
| 391 | 0.615385 | 0.928205 | 0.876068 | 0.549289 |
| 392 | 0.615385 | 0.933333 | 0.880342 | 0.560486 |
| 393 | 0.615385 | 0.933333 | 0.880342 | 0.560486 |
| 394 | 0.615385 | 0.933333 | 0.880342 | 0.560486 |
| 395 | 0.641026 | 0.933333 | 0.884615 | 0.580381 |
| 396 | 0.589744 | 0.933333 | 0.876068 | 0.540295 |
| 397 | 0.615385 | 0.933333 | 0.880342 | 0.560486 |
| 398 | 0.615385 | 0.933333 | 0.880342 | 0.560486 |
| 399 | 0.641026 | 0.933333 | 0.884615 | 0.580381 |
| 400 | 0.641026 | 0.933333 | 0.884615 | 0.580381 |
| 401 | 0.641026 | 0.933333 | 0.884615 | 0.580381 |
| 402 | 0.641026 | 0.933333 | 0.884615 | 0.580381 |
| 403 | 0.641026 | 0.933333 | 0.884615 | 0.580381 |
| 404 | 0.641026 | 0.933333 | 0.884615 | 0.580381 |
| 405 | 0.615385 | 0.933333 | 0.880342 | 0.560486 |
| 406 | 0.615385 | 0.933333 | 0.880342 | 0.560486 |
| 407 | 0.615385 | 0.933333 | 0.880342 | 0.560486 |
| 408 | 0.615385 | 0.933333 | 0.880342 | 0.560486 |
| 409 | 0.615385 | 0.938462 | 0.884615 | 0.572078 |
| 410 | 0.615385 | 0.938462 | 0.884615 | 0.572078 |
| 411 | 0.615385 | 0.938462 | 0.884615 | 0.572078 |
| 412 | 0.615385 | 0.938462 | 0.884615 | 0.572078 |
| 413 | 0.615385 | 0.938462 | 0.884615 | 0.572078 |
| 414 | 0.615385 | 0.938462 | 0.884615 | 0.572078 |
| 415 | 0.589744 | 0.938462 | 0.880342 | 0.55194  |
| 416 | 0.615385 | 0.938462 | 0.884615 | 0.572078 |
| 417 | 0.615385 | 0.938462 | 0.884615 | 0.572078 |
| 418 | 0.589744 | 0.938462 | 0.880342 | 0.55194  |
| 419 | 0.615385 | 0.938462 | 0.884615 | 0.572078 |
| 420 | 0.615385 | 0.938462 | 0.884615 | 0.572078 |
| 421 | 0.615385 | 0.938462 | 0.884615 | 0.572078 |
| 422 | 0.615385 | 0.938462 | 0.884615 | 0.572078 |
| 423 | 0.615385 | 0.938462 | 0.884615 | 0.572078 |
| 424 | 0.615385 | 0.938462 | 0.884615 | 0.572078 |
| 425 | 0.589744 | 0.938462 | 0.880342 | 0.55194  |
| 426 | 0.615385 | 0.938462 | 0.884615 | 0.572078 |
| 427 | 0.615385 | 0.938462 | 0.884615 | 0.572078 |
| 428 | 0.615385 | 0.938462 | 0.884615 | 0.572078 |
| 429 | 0.615385 | 0.938462 | 0.884615 | 0.572078 |
| 430 | 0.615385 | 0.938462 | 0.884615 | 0.572078 |

|     |          |          |          |          |
|-----|----------|----------|----------|----------|
| 431 | 0.615385 | 0.94359  | 0.888889 | 0.584092 |
| 432 | 0.615385 | 0.94359  | 0.888889 | 0.584092 |
| 433 | 0.615385 | 0.94359  | 0.888889 | 0.584092 |
| 434 | 0.615385 | 0.94359  | 0.888889 | 0.584092 |
| 435 | 0.615385 | 0.94359  | 0.888889 | 0.584092 |
| 436 | 0.615385 | 0.94359  | 0.888889 | 0.584092 |
| 437 | 0.641026 | 0.94359  | 0.893162 | 0.60386  |
| 438 | 0.641026 | 0.94359  | 0.893162 | 0.60386  |
| 439 | 0.641026 | 0.94359  | 0.893162 | 0.60386  |
| 440 | 0.641026 | 0.94359  | 0.893162 | 0.60386  |
| 441 | 0.641026 | 0.94359  | 0.893162 | 0.60386  |
| 442 | 0.641026 | 0.938462 | 0.888889 | 0.591915 |
| 443 | 0.641026 | 0.938462 | 0.888889 | 0.591915 |
| 444 | 0.615385 | 0.938462 | 0.884615 | 0.572078 |
| 445 | 0.615385 | 0.94359  | 0.888889 | 0.584092 |
| 446 | 0.615385 | 0.94359  | 0.888889 | 0.584092 |
| 447 | 0.615385 | 0.94359  | 0.888889 | 0.584092 |
| 448 | 0.615385 | 0.938462 | 0.884615 | 0.572078 |
| 449 | 0.589744 | 0.94359  | 0.884615 | 0.564019 |
| 450 | 0.615385 | 0.94359  | 0.888889 | 0.584092 |
| 451 | 0.641026 | 0.94359  | 0.893162 | 0.60386  |
| 452 | 0.641026 | 0.94359  | 0.893162 | 0.60386  |
| 453 | 0.641026 | 0.94359  | 0.893162 | 0.60386  |
| 454 | 0.641026 | 0.948718 | 0.897436 | 0.616243 |
| 455 | 0.641026 | 0.948718 | 0.897436 | 0.616243 |
| 456 | 0.641026 | 0.948718 | 0.897436 | 0.616243 |
| 457 | 0.641026 | 0.948718 | 0.897436 | 0.616243 |
| 458 | 0.641026 | 0.948718 | 0.897436 | 0.616243 |
| 459 | 0.641026 | 0.948718 | 0.897436 | 0.616243 |
| 460 | 0.641026 | 0.948718 | 0.897436 | 0.616243 |
| 461 | 0.641026 | 0.948718 | 0.897436 | 0.616243 |
| 462 | 0.641026 | 0.948718 | 0.897436 | 0.616243 |
| 463 | 0.641026 | 0.948718 | 0.897436 | 0.616243 |
| 464 | 0.641026 | 0.948718 | 0.897436 | 0.616243 |
| 465 | 0.641026 | 0.948718 | 0.897436 | 0.616243 |
| 466 | 0.641026 | 0.948718 | 0.897436 | 0.616243 |
| 467 | 0.641026 | 0.948718 | 0.897436 | 0.616243 |
| 468 | 0.641026 | 0.948718 | 0.897436 | 0.616243 |
| 469 | 0.641026 | 0.948718 | 0.897436 | 0.616243 |
| 470 | 0.641026 | 0.948718 | 0.897436 | 0.616243 |
| 471 | 0.641026 | 0.953846 | 0.901709 | 0.629098 |
| 472 | 0.641026 | 0.953846 | 0.901709 | 0.629098 |
| 473 | 0.641026 | 0.953846 | 0.901709 | 0.629098 |

|     |          |          |          |          |
|-----|----------|----------|----------|----------|
| 474 | 0.641026 | 0.953846 | 0.901709 | 0.629098 |
| 475 | 0.641026 | 0.958974 | 0.905983 | 0.64246  |
| 476 | 0.641026 | 0.958974 | 0.905983 | 0.64246  |
| 477 | 0.641026 | 0.958974 | 0.905983 | 0.64246  |
| 478 | 0.641026 | 0.958974 | 0.905983 | 0.64246  |
| 479 | 0.641026 | 0.958974 | 0.905983 | 0.64246  |
| 480 | 0.641026 | 0.958974 | 0.905983 | 0.64246  |
| 481 | 0.641026 | 0.958974 | 0.905983 | 0.64246  |
| 482 | 0.641026 | 0.958974 | 0.905983 | 0.64246  |
| 483 | 0.641026 | 0.958974 | 0.905983 | 0.64246  |
| 484 | 0.641026 | 0.958974 | 0.905983 | 0.64246  |
| 485 | 0.641026 | 0.958974 | 0.905983 | 0.64246  |
| 486 | 0.641026 | 0.958974 | 0.905983 | 0.64246  |
| 487 | 0.641026 | 0.958974 | 0.905983 | 0.64246  |
| 488 | 0.641026 | 0.964103 | 0.910256 | 0.656366 |
| 489 | 0.666667 | 0.964103 | 0.91453  | 0.675406 |
| 490 | 0.641026 | 0.964103 | 0.910256 | 0.656366 |
| 491 | 0.641026 | 0.964103 | 0.910256 | 0.656366 |
| 492 | 0.641026 | 0.964103 | 0.910256 | 0.656366 |
| 493 | 0.641026 | 0.964103 | 0.910256 | 0.656366 |
| 494 | 0.641026 | 0.964103 | 0.910256 | 0.656366 |
| 495 | 0.641026 | 0.964103 | 0.910256 | 0.656366 |
| 496 | 0.641026 | 0.964103 | 0.910256 | 0.656366 |
| 497 | 0.641026 | 0.964103 | 0.910256 | 0.656366 |
| 498 | 0.641026 | 0.964103 | 0.910256 | 0.656366 |
| 499 | 0.641026 | 0.964103 | 0.910256 | 0.656366 |
| 500 | 0.641026 | 0.964103 | 0.910256 | 0.656366 |

(5) Dataset  $D_5$

| Number of features | SN       | SP       | ACC      | MCC      |
|--------------------|----------|----------|----------|----------|
| 4                  | 0.487179 | 0.964103 | 0.884615 | 0.535155 |
| 5                  | 0.358974 | 0.974359 | 0.871795 | 0.454812 |
| 6                  | 0.410256 | 0.969231 | 0.876068 | 0.484582 |
| 7                  | 0.435897 | 0.979487 | 0.888889 | 0.541627 |
| 8                  | 0.461538 | 0.974359 | 0.888889 | 0.545668 |
| 9                  | 0.487179 | 0.984615 | 0.901709 | 0.602454 |
| 10                 | 0.487179 | 0.979487 | 0.897436 | 0.584186 |
| 11                 | 0.538462 | 0.979487 | 0.905983 | 0.624875 |
| 12                 | 0.487179 | 0.979487 | 0.897436 | 0.584186 |
| 13                 | 0.589744 | 0.984615 | 0.918803 | 0.681106 |
| 14                 | 0.564103 | 0.994872 | 0.923077 | 0.699739 |
| 15                 | 0.589744 | 0.989744 | 0.923077 | 0.699118 |

|    |          |          |          |          |
|----|----------|----------|----------|----------|
| 16 | 0.615385 | 0.984615 | 0.923077 | 0.699896 |
| 17 | 0.589744 | 0.984615 | 0.918803 | 0.681106 |
| 18 | 0.589744 | 0.984615 | 0.918803 | 0.681106 |
| 19 | 0.589744 | 0.984615 | 0.918803 | 0.681106 |
| 20 | 0.589744 | 0.979487 | 0.91453  | 0.664004 |
| 21 | 0.615385 | 0.979487 | 0.918803 | 0.683062 |
| 22 | 0.615385 | 0.979487 | 0.918803 | 0.683062 |
| 23 | 0.589744 | 0.979487 | 0.91453  | 0.664004 |
| 24 | 0.589744 | 0.979487 | 0.91453  | 0.664004 |
| 25 | 0.589744 | 0.974359 | 0.910256 | 0.647732 |
| 26 | 0.589744 | 0.974359 | 0.910256 | 0.647732 |
| 27 | 0.589744 | 0.974359 | 0.910256 | 0.647732 |
| 28 | 0.589744 | 0.969231 | 0.905983 | 0.632216 |
| 29 | 0.641026 | 0.974359 | 0.918803 | 0.685994 |
| 30 | 0.666667 | 0.974359 | 0.923077 | 0.704687 |
| 31 | 0.666667 | 0.974359 | 0.923077 | 0.704687 |
| 32 | 0.666667 | 0.974359 | 0.923077 | 0.704687 |
| 33 | 0.666667 | 0.979487 | 0.92735  | 0.720294 |
| 34 | 0.666667 | 0.974359 | 0.923077 | 0.704687 |
| 35 | 0.641026 | 0.974359 | 0.918803 | 0.685994 |
| 36 | 0.589744 | 0.974359 | 0.910256 | 0.647732 |
| 37 | 0.589744 | 0.969231 | 0.905983 | 0.632216 |
| 38 | 0.589744 | 0.969231 | 0.905983 | 0.632216 |
| 39 | 0.589744 | 0.969231 | 0.905983 | 0.632216 |
| 40 | 0.615385 | 0.964103 | 0.905983 | 0.637037 |
| 41 | 0.615385 | 0.964103 | 0.905983 | 0.637037 |
| 42 | 0.615385 | 0.964103 | 0.905983 | 0.637037 |
| 43 | 0.615385 | 0.964103 | 0.905983 | 0.637037 |
| 44 | 0.589744 | 0.964103 | 0.901709 | 0.617395 |
| 45 | 0.615385 | 0.964103 | 0.905983 | 0.637037 |
| 46 | 0.615385 | 0.964103 | 0.905983 | 0.637037 |
| 47 | 0.615385 | 0.964103 | 0.905983 | 0.637037 |
| 48 | 0.615385 | 0.964103 | 0.905983 | 0.637037 |
| 49 | 0.615385 | 0.964103 | 0.905983 | 0.637037 |
| 50 | 0.615385 | 0.964103 | 0.905983 | 0.637037 |
| 51 | 0.641026 | 0.969231 | 0.91453  | 0.670862 |
| 52 | 0.641026 | 0.969231 | 0.91453  | 0.670862 |
| 53 | 0.641026 | 0.964103 | 0.910256 | 0.656366 |
| 54 | 0.641026 | 0.964103 | 0.910256 | 0.656366 |
| 55 | 0.615385 | 0.964103 | 0.905983 | 0.637037 |
| 56 | 0.589744 | 0.964103 | 0.901709 | 0.617395 |
| 57 | 0.589744 | 0.964103 | 0.901709 | 0.617395 |
| 58 | 0.589744 | 0.964103 | 0.901709 | 0.617395 |



|     |          |          |          |          |
|-----|----------|----------|----------|----------|
| 59  | 0.564103 | 0.964103 | 0.897436 | 0.597415 |
| 60  | 0.564103 | 0.958974 | 0.893162 | 0.583095 |
| 61  | 0.564103 | 0.953846 | 0.888889 | 0.569387 |
| 62  | 0.564103 | 0.958974 | 0.893162 | 0.583095 |
| 63  | 0.564103 | 0.964103 | 0.897436 | 0.597415 |
| 64  | 0.589744 | 0.958974 | 0.897436 | 0.603212 |
| 65  | 0.589744 | 0.964103 | 0.901709 | 0.617395 |
| 66  | 0.538462 | 0.964103 | 0.893162 | 0.57707  |
| 67  | 0.589744 | 0.964103 | 0.901709 | 0.617395 |
| 68  | 0.589744 | 0.964103 | 0.901709 | 0.617395 |
| 69  | 0.564103 | 0.964103 | 0.897436 | 0.597415 |
| 70  | 0.589744 | 0.969231 | 0.905983 | 0.632216 |
| 71  | 0.589744 | 0.969231 | 0.905983 | 0.632216 |
| 72  | 0.589744 | 0.964103 | 0.901709 | 0.617395 |
| 73  | 0.589744 | 0.958974 | 0.897436 | 0.603212 |
| 74  | 0.589744 | 0.964103 | 0.901709 | 0.617395 |
| 75  | 0.589744 | 0.958974 | 0.897436 | 0.603212 |
| 76  | 0.589744 | 0.964103 | 0.901709 | 0.617395 |
| 77  | 0.589744 | 0.958974 | 0.897436 | 0.603212 |
| 78  | 0.589744 | 0.964103 | 0.901709 | 0.617395 |
| 79  | 0.589744 | 0.964103 | 0.901709 | 0.617395 |
| 80  | 0.589744 | 0.964103 | 0.901709 | 0.617395 |
| 81  | 0.589744 | 0.953846 | 0.893162 | 0.589617 |
| 82  | 0.589744 | 0.948718 | 0.888889 | 0.576566 |
| 83  | 0.564103 | 0.948718 | 0.884615 | 0.556243 |
| 84  | 0.564103 | 0.948718 | 0.884615 | 0.556243 |
| 85  | 0.564103 | 0.948718 | 0.884615 | 0.556243 |
| 86  | 0.589744 | 0.94359  | 0.884615 | 0.564019 |
| 87  | 0.589744 | 0.964103 | 0.901709 | 0.617395 |
| 88  | 0.615385 | 0.953846 | 0.897436 | 0.609513 |
| 89  | 0.589744 | 0.969231 | 0.905983 | 0.632216 |
| 90  | 0.615385 | 0.969231 | 0.910256 | 0.651695 |
| 91  | 0.615385 | 0.969231 | 0.910256 | 0.651695 |
| 92  | 0.615385 | 0.969231 | 0.910256 | 0.651695 |
| 93  | 0.717949 | 0.969231 | 0.92735  | 0.726717 |
| 94  | 0.666667 | 0.969231 | 0.918803 | 0.689741 |
| 95  | 0.692308 | 0.964103 | 0.918803 | 0.694177 |
| 96  | 0.692308 | 0.948718 | 0.905983 | 0.654773 |
| 97  | 0.74359  | 0.958974 | 0.923077 | 0.717632 |
| 98  | 0.74359  | 0.958974 | 0.923077 | 0.717632 |
| 99  | 0.74359  | 0.958974 | 0.923077 | 0.717632 |
| 100 | 0.74359  | 0.958974 | 0.923077 | 0.717632 |
| 101 | 0.717949 | 0.953846 | 0.91453  | 0.686203 |

|     |          |          |          |          |
|-----|----------|----------|----------|----------|
| 102 | 0.74359  | 0.953846 | 0.918803 | 0.704748 |
| 103 | 0.692308 | 0.953846 | 0.910256 | 0.667424 |
| 104 | 0.666667 | 0.953846 | 0.905983 | 0.648395 |
| 105 | 0.666667 | 0.948718 | 0.901709 | 0.635642 |
| 106 | 0.666667 | 0.948718 | 0.901709 | 0.635642 |
| 107 | 0.666667 | 0.964103 | 0.91453  | 0.675406 |
| 108 | 0.666667 | 0.964103 | 0.91453  | 0.675406 |
| 109 | 0.666667 | 0.958974 | 0.910256 | 0.661638 |
| 110 | 0.666667 | 0.958974 | 0.910256 | 0.661638 |
| 111 | 0.666667 | 0.958974 | 0.910256 | 0.661638 |
| 112 | 0.641026 | 0.958974 | 0.905983 | 0.64246  |
| 113 | 0.666667 | 0.958974 | 0.910256 | 0.661638 |
| 114 | 0.641026 | 0.958974 | 0.905983 | 0.64246  |
| 115 | 0.666667 | 0.958974 | 0.910256 | 0.661638 |
| 116 | 0.666667 | 0.958974 | 0.910256 | 0.661638 |
| 117 | 0.641026 | 0.958974 | 0.905983 | 0.64246  |
| 118 | 0.641026 | 0.958974 | 0.905983 | 0.64246  |
| 119 | 0.615385 | 0.953846 | 0.897436 | 0.609513 |
| 120 | 0.666667 | 0.958974 | 0.910256 | 0.661638 |
| 121 | 0.666667 | 0.958974 | 0.910256 | 0.661638 |
| 122 | 0.692308 | 0.958974 | 0.91453  | 0.680547 |
| 123 | 0.692308 | 0.953846 | 0.910256 | 0.667424 |
| 124 | 0.692308 | 0.964103 | 0.918803 | 0.694177 |
| 125 | 0.692308 | 0.964103 | 0.918803 | 0.694177 |
| 126 | 0.692308 | 0.964103 | 0.918803 | 0.694177 |
| 127 | 0.692308 | 0.964103 | 0.918803 | 0.694177 |
| 128 | 0.692308 | 0.964103 | 0.918803 | 0.694177 |
| 129 | 0.692308 | 0.969231 | 0.923077 | 0.708353 |
| 130 | 0.717949 | 0.969231 | 0.92735  | 0.726717 |
| 131 | 0.717949 | 0.969231 | 0.92735  | 0.726717 |
| 132 | 0.717949 | 0.969231 | 0.92735  | 0.726717 |
| 133 | 0.717949 | 0.969231 | 0.92735  | 0.726717 |
| 134 | 0.717949 | 0.969231 | 0.92735  | 0.726717 |
| 135 | 0.717949 | 0.964103 | 0.923077 | 0.712699 |
| 136 | 0.717949 | 0.964103 | 0.923077 | 0.712699 |
| 137 | 0.717949 | 0.964103 | 0.923077 | 0.712699 |
| 138 | 0.717949 | 0.964103 | 0.923077 | 0.712699 |
| 139 | 0.717949 | 0.964103 | 0.923077 | 0.712699 |
| 140 | 0.692308 | 0.964103 | 0.918803 | 0.694177 |
| 141 | 0.74359  | 0.964103 | 0.92735  | 0.730988 |
| 142 | 0.717949 | 0.964103 | 0.923077 | 0.712699 |
| 143 | 0.717949 | 0.964103 | 0.923077 | 0.712699 |
| 144 | 0.717949 | 0.964103 | 0.923077 | 0.712699 |

|     |          |          |          |          |
|-----|----------|----------|----------|----------|
| 145 | 0.692308 | 0.969231 | 0.923077 | 0.708353 |
| 146 | 0.74359  | 0.969231 | 0.931624 | 0.744851 |
| 147 | 0.74359  | 0.969231 | 0.931624 | 0.744851 |
| 148 | 0.74359  | 0.969231 | 0.931624 | 0.744851 |
| 149 | 0.74359  | 0.969231 | 0.931624 | 0.744851 |
| 150 | 0.74359  | 0.958974 | 0.923077 | 0.717632 |
| 151 | 0.692308 | 0.958974 | 0.91453  | 0.680547 |
| 152 | 0.692308 | 0.958974 | 0.91453  | 0.680547 |
| 153 | 0.717949 | 0.964103 | 0.923077 | 0.712699 |
| 154 | 0.666667 | 0.969231 | 0.918803 | 0.689741 |
| 155 | 0.666667 | 0.969231 | 0.918803 | 0.689741 |
| 156 | 0.666667 | 0.969231 | 0.918803 | 0.689741 |
| 157 | 0.666667 | 0.969231 | 0.918803 | 0.689741 |
| 158 | 0.666667 | 0.964103 | 0.91453  | 0.675406 |
| 159 | 0.666667 | 0.964103 | 0.91453  | 0.675406 |
| 160 | 0.666667 | 0.964103 | 0.91453  | 0.675406 |
| 161 | 0.666667 | 0.969231 | 0.918803 | 0.689741 |
| 162 | 0.692308 | 0.964103 | 0.918803 | 0.694177 |
| 163 | 0.692308 | 0.964103 | 0.918803 | 0.694177 |
| 164 | 0.692308 | 0.964103 | 0.918803 | 0.694177 |
| 165 | 0.692308 | 0.964103 | 0.918803 | 0.694177 |
| 166 | 0.692308 | 0.964103 | 0.918803 | 0.694177 |
| 167 | 0.692308 | 0.964103 | 0.918803 | 0.694177 |
| 168 | 0.692308 | 0.964103 | 0.918803 | 0.694177 |
| 169 | 0.692308 | 0.964103 | 0.918803 | 0.694177 |
| 170 | 0.692308 | 0.964103 | 0.918803 | 0.694177 |
| 171 | 0.692308 | 0.964103 | 0.918803 | 0.694177 |
| 172 | 0.717949 | 0.964103 | 0.923077 | 0.712699 |
| 173 | 0.717949 | 0.969231 | 0.92735  | 0.726717 |
| 174 | 0.717949 | 0.974359 | 0.931624 | 0.7413   |
| 175 | 0.717949 | 0.969231 | 0.92735  | 0.726717 |
| 176 | 0.717949 | 0.969231 | 0.92735  | 0.726717 |
| 177 | 0.717949 | 0.969231 | 0.92735  | 0.726717 |
| 178 | 0.717949 | 0.974359 | 0.931624 | 0.7413   |
| 179 | 0.717949 | 0.974359 | 0.931624 | 0.7413   |
| 180 | 0.717949 | 0.974359 | 0.931624 | 0.7413   |
| 181 | 0.692308 | 0.969231 | 0.923077 | 0.708353 |
| 182 | 0.692308 | 0.969231 | 0.923077 | 0.708353 |
| 183 | 0.692308 | 0.969231 | 0.923077 | 0.708353 |
| 184 | 0.692308 | 0.969231 | 0.923077 | 0.708353 |
| 185 | 0.717949 | 0.969231 | 0.92735  | 0.726717 |
| 186 | 0.717949 | 0.969231 | 0.92735  | 0.726717 |
| 187 | 0.717949 | 0.964103 | 0.923077 | 0.712699 |

|     |          |          |          |          |
|-----|----------|----------|----------|----------|
| 188 | 0.717949 | 0.964103 | 0.923077 | 0.712699 |
| 189 | 0.717949 | 0.964103 | 0.923077 | 0.712699 |
| 190 | 0.717949 | 0.964103 | 0.923077 | 0.712699 |
| 191 | 0.717949 | 0.964103 | 0.923077 | 0.712699 |
| 192 | 0.717949 | 0.964103 | 0.923077 | 0.712699 |
| 193 | 0.717949 | 0.974359 | 0.931624 | 0.7413   |
| 194 | 0.717949 | 0.974359 | 0.931624 | 0.7413   |
| 195 | 0.717949 | 0.969231 | 0.92735  | 0.726717 |
| 196 | 0.692308 | 0.964103 | 0.918803 | 0.694177 |
| 197 | 0.692308 | 0.969231 | 0.923077 | 0.708353 |
| 198 | 0.692308 | 0.969231 | 0.923077 | 0.708353 |
| 199 | 0.692308 | 0.969231 | 0.923077 | 0.708353 |
| 200 | 0.692308 | 0.969231 | 0.923077 | 0.708353 |
| 201 | 0.692308 | 0.969231 | 0.923077 | 0.708353 |
| 202 | 0.692308 | 0.969231 | 0.923077 | 0.708353 |
| 203 | 0.717949 | 0.964103 | 0.923077 | 0.712699 |
| 204 | 0.717949 | 0.964103 | 0.923077 | 0.712699 |
| 205 | 0.717949 | 0.964103 | 0.923077 | 0.712699 |
| 206 | 0.717949 | 0.964103 | 0.923077 | 0.712699 |
| 207 | 0.717949 | 0.969231 | 0.92735  | 0.726717 |
| 208 | 0.717949 | 0.969231 | 0.92735  | 0.726717 |
| 209 | 0.717949 | 0.969231 | 0.92735  | 0.726717 |
| 210 | 0.717949 | 0.964103 | 0.923077 | 0.712699 |
| 211 | 0.717949 | 0.964103 | 0.923077 | 0.712699 |
| 212 | 0.717949 | 0.964103 | 0.923077 | 0.712699 |
| 213 | 0.717949 | 0.964103 | 0.923077 | 0.712699 |
| 214 | 0.717949 | 0.964103 | 0.923077 | 0.712699 |
| 215 | 0.717949 | 0.964103 | 0.923077 | 0.712699 |
| 216 | 0.717949 | 0.964103 | 0.923077 | 0.712699 |
| 217 | 0.717949 | 0.964103 | 0.923077 | 0.712699 |
| 218 | 0.692308 | 0.969231 | 0.923077 | 0.708353 |
| 219 | 0.692308 | 0.969231 | 0.923077 | 0.708353 |
| 220 | 0.692308 | 0.964103 | 0.918803 | 0.694177 |
| 221 | 0.692308 | 0.964103 | 0.918803 | 0.694177 |
| 222 | 0.692308 | 0.964103 | 0.918803 | 0.694177 |
| 223 | 0.692308 | 0.964103 | 0.918803 | 0.694177 |
| 224 | 0.692308 | 0.964103 | 0.918803 | 0.694177 |
| 225 | 0.692308 | 0.964103 | 0.918803 | 0.694177 |
| 226 | 0.717949 | 0.964103 | 0.923077 | 0.712699 |
| 227 | 0.717949 | 0.964103 | 0.923077 | 0.712699 |
| 228 | 0.717949 | 0.964103 | 0.923077 | 0.712699 |
| 229 | 0.74359  | 0.964103 | 0.92735  | 0.730988 |
| 230 | 0.74359  | 0.964103 | 0.92735  | 0.730988 |

|     |          |          |          |          |
|-----|----------|----------|----------|----------|
| 231 | 0.692308 | 0.964103 | 0.918803 | 0.694177 |
| 232 | 0.692308 | 0.964103 | 0.918803 | 0.694177 |
| 233 | 0.717949 | 0.964103 | 0.923077 | 0.712699 |
| 234 | 0.74359  | 0.964103 | 0.92735  | 0.730988 |
| 235 | 0.717949 | 0.964103 | 0.923077 | 0.712699 |
| 236 | 0.692308 | 0.964103 | 0.918803 | 0.694177 |
| 237 | 0.666667 | 0.964103 | 0.91453  | 0.675406 |
| 238 | 0.666667 | 0.964103 | 0.91453  | 0.675406 |
| 239 | 0.692308 | 0.964103 | 0.918803 | 0.694177 |
| 240 | 0.666667 | 0.964103 | 0.91453  | 0.675406 |
| 241 | 0.666667 | 0.958974 | 0.910256 | 0.661638 |
| 242 | 0.666667 | 0.958974 | 0.910256 | 0.661638 |
| 243 | 0.666667 | 0.958974 | 0.910256 | 0.661638 |
| 244 | 0.692308 | 0.958974 | 0.91453  | 0.680547 |
| 245 | 0.692308 | 0.958974 | 0.91453  | 0.680547 |
| 246 | 0.692308 | 0.958974 | 0.91453  | 0.680547 |
| 247 | 0.692308 | 0.964103 | 0.918803 | 0.694177 |
| 248 | 0.692308 | 0.964103 | 0.918803 | 0.694177 |
| 249 | 0.692308 | 0.964103 | 0.918803 | 0.694177 |
| 250 | 0.692308 | 0.964103 | 0.918803 | 0.694177 |
| 251 | 0.692308 | 0.964103 | 0.918803 | 0.694177 |
| 252 | 0.692308 | 0.964103 | 0.918803 | 0.694177 |
| 253 | 0.692308 | 0.969231 | 0.923077 | 0.708353 |
| 254 | 0.692308 | 0.969231 | 0.923077 | 0.708353 |
| 255 | 0.692308 | 0.969231 | 0.923077 | 0.708353 |
| 256 | 0.717949 | 0.964103 | 0.923077 | 0.712699 |
| 257 | 0.717949 | 0.964103 | 0.923077 | 0.712699 |
| 258 | 0.717949 | 0.964103 | 0.923077 | 0.712699 |
| 259 | 0.717949 | 0.964103 | 0.923077 | 0.712699 |
| 260 | 0.717949 | 0.964103 | 0.923077 | 0.712699 |
| 261 | 0.717949 | 0.964103 | 0.923077 | 0.712699 |
| 262 | 0.717949 | 0.964103 | 0.923077 | 0.712699 |
| 263 | 0.717949 | 0.964103 | 0.923077 | 0.712699 |
| 264 | 0.717949 | 0.964103 | 0.923077 | 0.712699 |
| 265 | 0.717949 | 0.964103 | 0.923077 | 0.712699 |
| 266 | 0.717949 | 0.964103 | 0.923077 | 0.712699 |
| 267 | 0.717949 | 0.964103 | 0.923077 | 0.712699 |
| 268 | 0.717949 | 0.964103 | 0.923077 | 0.712699 |
| 269 | 0.717949 | 0.964103 | 0.923077 | 0.712699 |
| 270 | 0.717949 | 0.964103 | 0.923077 | 0.712699 |
| 271 | 0.717949 | 0.964103 | 0.923077 | 0.712699 |
| 272 | 0.692308 | 0.964103 | 0.918803 | 0.694177 |
| 273 | 0.692308 | 0.964103 | 0.918803 | 0.694177 |

|     |          |          |          |          |
|-----|----------|----------|----------|----------|
| 274 | 0.692308 | 0.964103 | 0.918803 | 0.694177 |
| 275 | 0.692308 | 0.964103 | 0.918803 | 0.694177 |
| 276 | 0.692308 | 0.964103 | 0.918803 | 0.694177 |
| 277 | 0.692308 | 0.969231 | 0.923077 | 0.708353 |
| 278 | 0.692308 | 0.969231 | 0.923077 | 0.708353 |
| 279 | 0.692308 | 0.969231 | 0.923077 | 0.708353 |
| 280 | 0.692308 | 0.969231 | 0.923077 | 0.708353 |
| 281 | 0.692308 | 0.969231 | 0.923077 | 0.708353 |
| 282 | 0.692308 | 0.969231 | 0.923077 | 0.708353 |
| 283 | 0.692308 | 0.964103 | 0.918803 | 0.694177 |
| 284 | 0.692308 | 0.964103 | 0.918803 | 0.694177 |
| 285 | 0.692308 | 0.964103 | 0.918803 | 0.694177 |
| 286 | 0.692308 | 0.964103 | 0.918803 | 0.694177 |
| 287 | 0.692308 | 0.964103 | 0.918803 | 0.694177 |
| 288 | 0.717949 | 0.969231 | 0.92735  | 0.726717 |
| 289 | 0.692308 | 0.964103 | 0.918803 | 0.694177 |
| 290 | 0.692308 | 0.964103 | 0.918803 | 0.694177 |
| 291 | 0.717949 | 0.969231 | 0.92735  | 0.726717 |
| 292 | 0.717949 | 0.969231 | 0.92735  | 0.726717 |
| 293 | 0.717949 | 0.969231 | 0.92735  | 0.726717 |
| 294 | 0.717949 | 0.969231 | 0.92735  | 0.726717 |
| 295 | 0.717949 | 0.969231 | 0.92735  | 0.726717 |
| 296 | 0.692308 | 0.969231 | 0.923077 | 0.708353 |
| 297 | 0.717949 | 0.969231 | 0.92735  | 0.726717 |
| 298 | 0.717949 | 0.969231 | 0.92735  | 0.726717 |
| 299 | 0.717949 | 0.964103 | 0.923077 | 0.712699 |
| 300 | 0.717949 | 0.964103 | 0.923077 | 0.712699 |
| 301 | 0.717949 | 0.964103 | 0.923077 | 0.712699 |
| 302 | 0.717949 | 0.964103 | 0.923077 | 0.712699 |
| 303 | 0.717949 | 0.964103 | 0.923077 | 0.712699 |
| 304 | 0.717949 | 0.964103 | 0.923077 | 0.712699 |
| 305 | 0.717949 | 0.964103 | 0.923077 | 0.712699 |
| 306 | 0.717949 | 0.964103 | 0.923077 | 0.712699 |
| 307 | 0.692308 | 0.964103 | 0.918803 | 0.694177 |
| 308 | 0.692308 | 0.964103 | 0.918803 | 0.694177 |
| 309 | 0.692308 | 0.964103 | 0.918803 | 0.694177 |
| 310 | 0.692308 | 0.964103 | 0.918803 | 0.694177 |
| 311 | 0.692308 | 0.964103 | 0.918803 | 0.694177 |
| 312 | 0.692308 | 0.964103 | 0.918803 | 0.694177 |
| 313 | 0.74359  | 0.964103 | 0.92735  | 0.730988 |
| 314 | 0.74359  | 0.964103 | 0.92735  | 0.730988 |
| 315 | 0.74359  | 0.964103 | 0.92735  | 0.730988 |
| 316 | 0.74359  | 0.964103 | 0.92735  | 0.730988 |

|     |          |          |          |          |
|-----|----------|----------|----------|----------|
| 317 | 0.717949 | 0.964103 | 0.923077 | 0.712699 |
| 318 | 0.692308 | 0.964103 | 0.918803 | 0.694177 |
| 319 | 0.692308 | 0.964103 | 0.918803 | 0.694177 |
| 320 | 0.692308 | 0.964103 | 0.918803 | 0.694177 |
| 321 | 0.717949 | 0.964103 | 0.923077 | 0.712699 |
| 322 | 0.717949 | 0.964103 | 0.923077 | 0.712699 |
| 323 | 0.717949 | 0.964103 | 0.923077 | 0.712699 |
| 324 | 0.692308 | 0.964103 | 0.918803 | 0.694177 |
| 325 | 0.717949 | 0.964103 | 0.923077 | 0.712699 |
| 326 | 0.717949 | 0.964103 | 0.923077 | 0.712699 |
| 327 | 0.717949 | 0.964103 | 0.923077 | 0.712699 |
| 328 | 0.717949 | 0.958974 | 0.918803 | 0.699206 |
| 329 | 0.717949 | 0.958974 | 0.918803 | 0.699206 |
| 330 | 0.717949 | 0.964103 | 0.923077 | 0.712699 |
| 331 | 0.717949 | 0.958974 | 0.918803 | 0.699206 |
| 332 | 0.717949 | 0.953846 | 0.91453  | 0.686203 |
| 333 | 0.717949 | 0.953846 | 0.91453  | 0.686203 |
| 334 | 0.717949 | 0.953846 | 0.91453  | 0.686203 |
| 335 | 0.717949 | 0.953846 | 0.91453  | 0.686203 |
| 336 | 0.717949 | 0.953846 | 0.91453  | 0.686203 |
| 337 | 0.717949 | 0.953846 | 0.91453  | 0.686203 |
| 338 | 0.717949 | 0.953846 | 0.91453  | 0.686203 |
| 339 | 0.717949 | 0.953846 | 0.91453  | 0.686203 |
| 340 | 0.717949 | 0.953846 | 0.91453  | 0.686203 |
| 341 | 0.717949 | 0.953846 | 0.91453  | 0.686203 |
| 342 | 0.717949 | 0.953846 | 0.91453  | 0.686203 |
| 343 | 0.717949 | 0.953846 | 0.91453  | 0.686203 |
| 344 | 0.717949 | 0.953846 | 0.91453  | 0.686203 |
| 345 | 0.717949 | 0.953846 | 0.91453  | 0.686203 |
| 346 | 0.717949 | 0.953846 | 0.91453  | 0.686203 |
| 347 | 0.717949 | 0.953846 | 0.91453  | 0.686203 |
| 348 | 0.717949 | 0.953846 | 0.91453  | 0.686203 |
| 349 | 0.717949 | 0.953846 | 0.91453  | 0.686203 |
| 350 | 0.692308 | 0.964103 | 0.918803 | 0.694177 |
| 351 | 0.692308 | 0.964103 | 0.918803 | 0.694177 |
| 352 | 0.692308 | 0.964103 | 0.918803 | 0.694177 |
| 353 | 0.717949 | 0.964103 | 0.923077 | 0.712699 |
| 354 | 0.717949 | 0.964103 | 0.923077 | 0.712699 |
| 355 | 0.717949 | 0.969231 | 0.92735  | 0.726717 |
| 356 | 0.717949 | 0.969231 | 0.92735  | 0.726717 |
| 357 | 0.717949 | 0.969231 | 0.92735  | 0.726717 |
| 358 | 0.717949 | 0.969231 | 0.92735  | 0.726717 |
| 359 | 0.717949 | 0.969231 | 0.92735  | 0.726717 |

|     |          |          |          |          |
|-----|----------|----------|----------|----------|
| 360 | 0.717949 | 0.969231 | 0.92735  | 0.726717 |
| 361 | 0.717949 | 0.969231 | 0.92735  | 0.726717 |
| 362 | 0.717949 | 0.969231 | 0.92735  | 0.726717 |
| 363 | 0.717949 | 0.969231 | 0.92735  | 0.726717 |
| 364 | 0.717949 | 0.969231 | 0.92735  | 0.726717 |
| 365 | 0.717949 | 0.969231 | 0.92735  | 0.726717 |
| 366 | 0.717949 | 0.958974 | 0.918803 | 0.699206 |
| 367 | 0.717949 | 0.958974 | 0.918803 | 0.699206 |
| 368 | 0.717949 | 0.958974 | 0.918803 | 0.699206 |
| 369 | 0.717949 | 0.958974 | 0.918803 | 0.699206 |
| 370 | 0.717949 | 0.958974 | 0.918803 | 0.699206 |
| 371 | 0.717949 | 0.958974 | 0.918803 | 0.699206 |
| 372 | 0.717949 | 0.964103 | 0.923077 | 0.712699 |
| 373 | 0.717949 | 0.964103 | 0.923077 | 0.712699 |
| 374 | 0.717949 | 0.958974 | 0.918803 | 0.699206 |
| 375 | 0.717949 | 0.964103 | 0.923077 | 0.712699 |
| 376 | 0.717949 | 0.964103 | 0.923077 | 0.712699 |
| 377 | 0.717949 | 0.964103 | 0.923077 | 0.712699 |
| 378 | 0.717949 | 0.964103 | 0.923077 | 0.712699 |
| 379 | 0.717949 | 0.964103 | 0.923077 | 0.712699 |
| 380 | 0.717949 | 0.964103 | 0.923077 | 0.712699 |
| 381 | 0.717949 | 0.964103 | 0.923077 | 0.712699 |
| 382 | 0.717949 | 0.964103 | 0.923077 | 0.712699 |
| 383 | 0.717949 | 0.964103 | 0.923077 | 0.712699 |
| 384 | 0.717949 | 0.964103 | 0.923077 | 0.712699 |
| 385 | 0.717949 | 0.964103 | 0.923077 | 0.712699 |
| 386 | 0.717949 | 0.964103 | 0.923077 | 0.712699 |
| 387 | 0.717949 | 0.964103 | 0.923077 | 0.712699 |
| 388 | 0.717949 | 0.964103 | 0.923077 | 0.712699 |
| 389 | 0.717949 | 0.958974 | 0.918803 | 0.699206 |
| 390 | 0.717949 | 0.958974 | 0.918803 | 0.699206 |
| 391 | 0.717949 | 0.958974 | 0.918803 | 0.699206 |
| 392 | 0.717949 | 0.958974 | 0.918803 | 0.699206 |
| 393 | 0.717949 | 0.958974 | 0.918803 | 0.699206 |
| 394 | 0.717949 | 0.958974 | 0.918803 | 0.699206 |
| 395 | 0.717949 | 0.958974 | 0.918803 | 0.699206 |
| 396 | 0.717949 | 0.958974 | 0.918803 | 0.699206 |
| 397 | 0.717949 | 0.964103 | 0.923077 | 0.712699 |
| 398 | 0.717949 | 0.964103 | 0.923077 | 0.712699 |
| 399 | 0.717949 | 0.964103 | 0.923077 | 0.712699 |
| 400 | 0.717949 | 0.964103 | 0.923077 | 0.712699 |
| 401 | 0.717949 | 0.969231 | 0.92735  | 0.726717 |
| 402 | 0.717949 | 0.969231 | 0.92735  | 0.726717 |



|     |          |          |          |          |
|-----|----------|----------|----------|----------|
| 403 | 0.717949 | 0.969231 | 0.92735  | 0.726717 |
| 404 | 0.717949 | 0.969231 | 0.92735  | 0.726717 |
| 405 | 0.717949 | 0.969231 | 0.92735  | 0.726717 |
| 406 | 0.717949 | 0.969231 | 0.92735  | 0.726717 |
| 407 | 0.717949 | 0.969231 | 0.92735  | 0.726717 |
| 408 | 0.717949 | 0.969231 | 0.92735  | 0.726717 |
| 409 | 0.717949 | 0.969231 | 0.92735  | 0.726717 |
| 410 | 0.717949 | 0.969231 | 0.92735  | 0.726717 |
| 411 | 0.717949 | 0.969231 | 0.92735  | 0.726717 |
| 412 | 0.717949 | 0.969231 | 0.92735  | 0.726717 |
| 413 | 0.74359  | 0.969231 | 0.931624 | 0.744851 |
| 414 | 0.74359  | 0.969231 | 0.931624 | 0.744851 |
| 415 | 0.74359  | 0.969231 | 0.931624 | 0.744851 |
| 416 | 0.74359  | 0.969231 | 0.931624 | 0.744851 |
| 417 | 0.74359  | 0.969231 | 0.931624 | 0.744851 |
| 418 | 0.74359  | 0.969231 | 0.931624 | 0.744851 |
| 419 | 0.74359  | 0.969231 | 0.931624 | 0.744851 |
| 420 | 0.74359  | 0.969231 | 0.931624 | 0.744851 |
| 421 | 0.74359  | 0.969231 | 0.931624 | 0.744851 |
| 422 | 0.74359  | 0.969231 | 0.931624 | 0.744851 |
| 423 | 0.74359  | 0.969231 | 0.931624 | 0.744851 |
| 424 | 0.74359  | 0.969231 | 0.931624 | 0.744851 |
| 425 | 0.74359  | 0.969231 | 0.931624 | 0.744851 |
| 426 | 0.74359  | 0.969231 | 0.931624 | 0.744851 |
| 427 | 0.74359  | 0.969231 | 0.931624 | 0.744851 |
| 428 | 0.74359  | 0.969231 | 0.931624 | 0.744851 |
| 429 | 0.74359  | 0.969231 | 0.931624 | 0.744851 |
| 430 | 0.74359  | 0.969231 | 0.931624 | 0.744851 |
| 431 | 0.74359  | 0.969231 | 0.931624 | 0.744851 |
| 432 | 0.74359  | 0.969231 | 0.931624 | 0.744851 |
| 433 | 0.74359  | 0.969231 | 0.931624 | 0.744851 |
| 434 | 0.74359  | 0.969231 | 0.931624 | 0.744851 |
| 435 | 0.74359  | 0.969231 | 0.931624 | 0.744851 |
| 436 | 0.74359  | 0.969231 | 0.931624 | 0.744851 |
| 437 | 0.74359  | 0.969231 | 0.931624 | 0.744851 |
| 438 | 0.74359  | 0.969231 | 0.931624 | 0.744851 |
| 439 | 0.74359  | 0.969231 | 0.931624 | 0.744851 |
| 440 | 0.74359  | 0.969231 | 0.931624 | 0.744851 |
| 441 | 0.74359  | 0.969231 | 0.931624 | 0.744851 |
| 442 | 0.74359  | 0.969231 | 0.931624 | 0.744851 |
| 443 | 0.74359  | 0.969231 | 0.931624 | 0.744851 |
| 444 | 0.74359  | 0.969231 | 0.931624 | 0.744851 |
| 445 | 0.74359  | 0.969231 | 0.931624 | 0.744851 |

|     |          |          |          |          |
|-----|----------|----------|----------|----------|
| 446 | 0.74359  | 0.969231 | 0.931624 | 0.744851 |
| 447 | 0.74359  | 0.969231 | 0.931624 | 0.744851 |
| 448 | 0.74359  | 0.969231 | 0.931624 | 0.744851 |
| 449 | 0.74359  | 0.969231 | 0.931624 | 0.744851 |
| 450 | 0.74359  | 0.969231 | 0.931624 | 0.744851 |
| 451 | 0.74359  | 0.969231 | 0.931624 | 0.744851 |
| 452 | 0.74359  | 0.969231 | 0.931624 | 0.744851 |
| 453 | 0.74359  | 0.969231 | 0.931624 | 0.744851 |
| 454 | 0.74359  | 0.969231 | 0.931624 | 0.744851 |
| 455 | 0.717949 | 0.969231 | 0.92735  | 0.726717 |
| 456 | 0.717949 | 0.969231 | 0.92735  | 0.726717 |
| 457 | 0.717949 | 0.969231 | 0.92735  | 0.726717 |
| 458 | 0.717949 | 0.969231 | 0.92735  | 0.726717 |
| 459 | 0.717949 | 0.969231 | 0.92735  | 0.726717 |
| 460 | 0.717949 | 0.969231 | 0.92735  | 0.726717 |
| 461 | 0.717949 | 0.964103 | 0.923077 | 0.712699 |
| 462 | 0.717949 | 0.964103 | 0.923077 | 0.712699 |
| 463 | 0.717949 | 0.964103 | 0.923077 | 0.712699 |
| 464 | 0.717949 | 0.964103 | 0.923077 | 0.712699 |
| 465 | 0.717949 | 0.964103 | 0.923077 | 0.712699 |
| 466 | 0.717949 | 0.964103 | 0.923077 | 0.712699 |
| 467 | 0.717949 | 0.964103 | 0.923077 | 0.712699 |
| 468 | 0.717949 | 0.964103 | 0.923077 | 0.712699 |
| 469 | 0.692308 | 0.964103 | 0.918803 | 0.694177 |
| 470 | 0.692308 | 0.964103 | 0.918803 | 0.694177 |
| 471 | 0.692308 | 0.964103 | 0.918803 | 0.694177 |
| 472 | 0.692308 | 0.964103 | 0.918803 | 0.694177 |
| 473 | 0.692308 | 0.964103 | 0.918803 | 0.694177 |
| 474 | 0.692308 | 0.964103 | 0.918803 | 0.694177 |
| 475 | 0.692308 | 0.964103 | 0.918803 | 0.694177 |
| 476 | 0.692308 | 0.964103 | 0.918803 | 0.694177 |
| 477 | 0.692308 | 0.964103 | 0.918803 | 0.694177 |
| 478 | 0.692308 | 0.964103 | 0.918803 | 0.694177 |
| 479 | 0.692308 | 0.964103 | 0.918803 | 0.694177 |
| 480 | 0.666667 | 0.969231 | 0.918803 | 0.689741 |
| 481 | 0.666667 | 0.969231 | 0.918803 | 0.689741 |
| 482 | 0.666667 | 0.969231 | 0.918803 | 0.689741 |
| 483 | 0.666667 | 0.969231 | 0.918803 | 0.689741 |
| 484 | 0.666667 | 0.969231 | 0.918803 | 0.689741 |
| 485 | 0.666667 | 0.969231 | 0.918803 | 0.689741 |
| 486 | 0.666667 | 0.969231 | 0.918803 | 0.689741 |
| 487 | 0.692308 | 0.969231 | 0.923077 | 0.708353 |
| 488 | 0.692308 | 0.969231 | 0.923077 | 0.708353 |

|     |          |          |          |          |
|-----|----------|----------|----------|----------|
| 489 | 0.666667 | 0.969231 | 0.918803 | 0.689741 |
| 490 | 0.717949 | 0.969231 | 0.92735  | 0.726717 |
| 491 | 0.717949 | 0.969231 | 0.92735  | 0.726717 |
| 492 | 0.717949 | 0.969231 | 0.92735  | 0.726717 |
| 493 | 0.692308 | 0.964103 | 0.918803 | 0.694177 |
| 494 | 0.717949 | 0.969231 | 0.92735  | 0.726717 |
| 495 | 0.717949 | 0.969231 | 0.92735  | 0.726717 |
| 496 | 0.717949 | 0.964103 | 0.923077 | 0.712699 |
| 497 | 0.717949 | 0.964103 | 0.923077 | 0.712699 |
| 498 | 0.717949 | 0.964103 | 0.923077 | 0.712699 |
| 499 | 0.717949 | 0.964103 | 0.923077 | 0.712699 |
| 500 | 0.717949 | 0.964103 | 0.923077 | 0.712699 |

(6) Dataset  $D_6$

| Number of features | SN       | SP       | ACC      | MCC      |
|--------------------|----------|----------|----------|----------|
| 4                  | 0.512821 | 0.979487 | 0.901709 | 0.604743 |
| 5                  | 0.512821 | 0.984615 | 0.905983 | 0.622704 |
| 6                  | 0.512821 | 0.984615 | 0.905983 | 0.622704 |
| 7                  | 0.512821 | 0.969231 | 0.893162 | 0.571643 |
| 8                  | 0.512821 | 0.969231 | 0.893162 | 0.571643 |
| 9                  | 0.512821 | 0.974359 | 0.897436 | 0.587754 |
| 10                 | 0.512821 | 0.974359 | 0.897436 | 0.587754 |
| 11                 | 0.512821 | 0.969231 | 0.893162 | 0.571643 |
| 12                 | 0.538462 | 0.979487 | 0.905983 | 0.624875 |
| 13                 | 0.538462 | 0.979487 | 0.905983 | 0.624875 |
| 14                 | 0.538462 | 0.979487 | 0.905983 | 0.624875 |
| 15                 | 0.512821 | 0.979487 | 0.901709 | 0.604743 |
| 16                 | 0.512821 | 0.974359 | 0.897436 | 0.587754 |
| 17                 | 0.538462 | 0.984615 | 0.910256 | 0.64254  |
| 18                 | 0.538462 | 0.984615 | 0.910256 | 0.64254  |
| 19                 | 0.538462 | 0.984615 | 0.910256 | 0.64254  |
| 20                 | 0.512821 | 0.984615 | 0.905983 | 0.622704 |
| 21                 | 0.512821 | 0.994872 | 0.91453  | 0.661989 |
| 22                 | 0.512821 | 0.984615 | 0.905983 | 0.622704 |
| 23                 | 0.538462 | 0.984615 | 0.910256 | 0.64254  |
| 24                 | 0.564103 | 0.989744 | 0.918803 | 0.680336 |
| 25                 | 0.564103 | 0.989744 | 0.918803 | 0.680336 |
| 26                 | 0.589744 | 0.989744 | 0.923077 | 0.699118 |
| 27                 | 0.564103 | 0.989744 | 0.918803 | 0.680336 |
| 28                 | 0.564103 | 0.989744 | 0.918803 | 0.680336 |
| 29                 | 0.564103 | 0.984615 | 0.91453  | 0.661996 |
| 30                 | 0.564103 | 0.984615 | 0.91453  | 0.661996 |

|    |          |          |          |          |
|----|----------|----------|----------|----------|
| 31 | 0.564103 | 0.984615 | 0.91453  | 0.661996 |
| 32 | 0.564103 | 0.984615 | 0.91453  | 0.661996 |
| 33 | 0.564103 | 0.979487 | 0.910256 | 0.644618 |
| 34 | 0.564103 | 0.984615 | 0.91453  | 0.661996 |
| 35 | 0.589744 | 0.979487 | 0.91453  | 0.664004 |
| 36 | 0.564103 | 0.979487 | 0.910256 | 0.644618 |
| 37 | 0.564103 | 0.979487 | 0.910256 | 0.644618 |
| 38 | 0.564103 | 0.979487 | 0.910256 | 0.644618 |
| 39 | 0.564103 | 0.979487 | 0.910256 | 0.644618 |
| 40 | 0.564103 | 0.979487 | 0.910256 | 0.644618 |
| 41 | 0.564103 | 0.979487 | 0.910256 | 0.644618 |
| 42 | 0.564103 | 0.979487 | 0.910256 | 0.644618 |
| 43 | 0.564103 | 0.979487 | 0.910256 | 0.644618 |
| 44 | 0.564103 | 0.979487 | 0.910256 | 0.644618 |
| 45 | 0.564103 | 0.979487 | 0.910256 | 0.644618 |
| 46 | 0.564103 | 0.979487 | 0.910256 | 0.644618 |
| 47 | 0.564103 | 0.979487 | 0.910256 | 0.644618 |
| 48 | 0.564103 | 0.979487 | 0.910256 | 0.644618 |
| 49 | 0.564103 | 0.979487 | 0.910256 | 0.644618 |
| 50 | 0.589744 | 0.974359 | 0.910256 | 0.647732 |
| 51 | 0.564103 | 0.974359 | 0.905983 | 0.628112 |
| 52 | 0.564103 | 0.969231 | 0.901709 | 0.612401 |
| 53 | 0.564103 | 0.969231 | 0.901709 | 0.612401 |
| 54 | 0.564103 | 0.969231 | 0.901709 | 0.612401 |
| 55 | 0.564103 | 0.969231 | 0.901709 | 0.612401 |
| 56 | 0.564103 | 0.969231 | 0.901709 | 0.612401 |
| 57 | 0.538462 | 0.964103 | 0.893162 | 0.57707  |
| 58 | 0.538462 | 0.969231 | 0.897436 | 0.59222  |
| 59 | 0.538462 | 0.969231 | 0.897436 | 0.59222  |
| 60 | 0.538462 | 0.969231 | 0.897436 | 0.59222  |
| 61 | 0.538462 | 0.969231 | 0.897436 | 0.59222  |
| 62 | 0.564103 | 0.969231 | 0.901709 | 0.612401 |
| 63 | 0.564103 | 0.969231 | 0.901709 | 0.612401 |
| 64 | 0.564103 | 0.969231 | 0.901709 | 0.612401 |
| 65 | 0.564103 | 0.974359 | 0.905983 | 0.628112 |
| 66 | 0.564103 | 0.974359 | 0.905983 | 0.628112 |
| 67 | 0.564103 | 0.974359 | 0.905983 | 0.628112 |
| 68 | 0.564103 | 0.969231 | 0.901709 | 0.612401 |
| 69 | 0.564103 | 0.969231 | 0.901709 | 0.612401 |
| 70 | 0.564103 | 0.969231 | 0.901709 | 0.612401 |
| 71 | 0.564103 | 0.969231 | 0.901709 | 0.612401 |
| 72 | 0.564103 | 0.969231 | 0.901709 | 0.612401 |
| 73 | 0.564103 | 0.969231 | 0.901709 | 0.612401 |

|     |          |          |          |          |
|-----|----------|----------|----------|----------|
| 74  | 0.564103 | 0.969231 | 0.901709 | 0.612401 |
| 75  | 0.564103 | 0.969231 | 0.901709 | 0.612401 |
| 76  | 0.564103 | 0.964103 | 0.897436 | 0.597415 |
| 77  | 0.564103 | 0.964103 | 0.897436 | 0.597415 |
| 78  | 0.564103 | 0.964103 | 0.897436 | 0.597415 |
| 79  | 0.564103 | 0.964103 | 0.897436 | 0.597415 |
| 80  | 0.564103 | 0.969231 | 0.901709 | 0.612401 |
| 81  | 0.564103 | 0.969231 | 0.901709 | 0.612401 |
| 82  | 0.564103 | 0.964103 | 0.897436 | 0.597415 |
| 83  | 0.564103 | 0.964103 | 0.897436 | 0.597415 |
| 84  | 0.564103 | 0.969231 | 0.901709 | 0.612401 |
| 85  | 0.564103 | 0.969231 | 0.901709 | 0.612401 |
| 86  | 0.564103 | 0.969231 | 0.901709 | 0.612401 |
| 87  | 0.564103 | 0.964103 | 0.897436 | 0.597415 |
| 88  | 0.564103 | 0.964103 | 0.897436 | 0.597415 |
| 89  | 0.564103 | 0.964103 | 0.897436 | 0.597415 |
| 90  | 0.564103 | 0.964103 | 0.897436 | 0.597415 |
| 91  | 0.564103 | 0.958974 | 0.893162 | 0.583095 |
| 92  | 0.564103 | 0.964103 | 0.897436 | 0.597415 |
| 93  | 0.564103 | 0.958974 | 0.893162 | 0.583095 |
| 94  | 0.589744 | 0.964103 | 0.901709 | 0.617395 |
| 95  | 0.589744 | 0.964103 | 0.901709 | 0.617395 |
| 96  | 0.589744 | 0.964103 | 0.901709 | 0.617395 |
| 97  | 0.564103 | 0.964103 | 0.897436 | 0.597415 |
| 98  | 0.589744 | 0.964103 | 0.901709 | 0.617395 |
| 99  | 0.589744 | 0.964103 | 0.901709 | 0.617395 |
| 100 | 0.589744 | 0.964103 | 0.901709 | 0.617395 |
| 101 | 0.589744 | 0.958974 | 0.897436 | 0.603212 |
| 102 | 0.589744 | 0.958974 | 0.897436 | 0.603212 |
| 103 | 0.589744 | 0.964103 | 0.901709 | 0.617395 |
| 104 | 0.589744 | 0.964103 | 0.901709 | 0.617395 |
| 105 | 0.589744 | 0.958974 | 0.897436 | 0.603212 |
| 106 | 0.589744 | 0.964103 | 0.901709 | 0.617395 |
| 107 | 0.589744 | 0.964103 | 0.901709 | 0.617395 |
| 108 | 0.589744 | 0.964103 | 0.901709 | 0.617395 |
| 109 | 0.564103 | 0.964103 | 0.897436 | 0.597415 |
| 110 | 0.564103 | 0.964103 | 0.897436 | 0.597415 |
| 111 | 0.564103 | 0.964103 | 0.897436 | 0.597415 |
| 112 | 0.589744 | 0.964103 | 0.901709 | 0.617395 |
| 113 | 0.589744 | 0.964103 | 0.901709 | 0.617395 |
| 114 | 0.615385 | 0.964103 | 0.905983 | 0.637037 |
| 115 | 0.615385 | 0.964103 | 0.905983 | 0.637037 |
| 116 | 0.615385 | 0.964103 | 0.905983 | 0.637037 |

|     |          |          |          |          |
|-----|----------|----------|----------|----------|
| 117 | 0.615385 | 0.964103 | 0.905983 | 0.637037 |
| 118 | 0.641026 | 0.964103 | 0.910256 | 0.656366 |
| 119 | 0.641026 | 0.964103 | 0.910256 | 0.656366 |
| 120 | 0.615385 | 0.964103 | 0.905983 | 0.637037 |
| 121 | 0.615385 | 0.964103 | 0.905983 | 0.637037 |
| 122 | 0.615385 | 0.964103 | 0.905983 | 0.637037 |
| 123 | 0.615385 | 0.964103 | 0.905983 | 0.637037 |
| 124 | 0.615385 | 0.964103 | 0.905983 | 0.637037 |
| 125 | 0.589744 | 0.964103 | 0.901709 | 0.617395 |
| 126 | 0.564103 | 0.964103 | 0.897436 | 0.597415 |
| 127 | 0.564103 | 0.964103 | 0.897436 | 0.597415 |
| 128 | 0.589744 | 0.969231 | 0.905983 | 0.632216 |
| 129 | 0.589744 | 0.958974 | 0.897436 | 0.603212 |
| 130 | 0.589744 | 0.958974 | 0.897436 | 0.603212 |
| 131 | 0.564103 | 0.958974 | 0.893162 | 0.583095 |
| 132 | 0.564103 | 0.958974 | 0.893162 | 0.583095 |
| 133 | 0.564103 | 0.958974 | 0.893162 | 0.583095 |
| 134 | 0.589744 | 0.958974 | 0.897436 | 0.603212 |
| 135 | 0.589744 | 0.958974 | 0.897436 | 0.603212 |
| 136 | 0.589744 | 0.958974 | 0.897436 | 0.603212 |
| 137 | 0.589744 | 0.958974 | 0.897436 | 0.603212 |
| 138 | 0.589744 | 0.958974 | 0.897436 | 0.603212 |
| 139 | 0.589744 | 0.964103 | 0.901709 | 0.617395 |
| 140 | 0.589744 | 0.964103 | 0.901709 | 0.617395 |
| 141 | 0.589744 | 0.969231 | 0.905983 | 0.632216 |
| 142 | 0.589744 | 0.974359 | 0.910256 | 0.647732 |
| 143 | 0.615385 | 0.969231 | 0.910256 | 0.651695 |
| 144 | 0.615385 | 0.969231 | 0.910256 | 0.651695 |
| 145 | 0.615385 | 0.974359 | 0.91453  | 0.667017 |
| 146 | 0.641026 | 0.974359 | 0.918803 | 0.685994 |
| 147 | 0.641026 | 0.974359 | 0.918803 | 0.685994 |
| 148 | 0.641026 | 0.974359 | 0.918803 | 0.685994 |
| 149 | 0.615385 | 0.974359 | 0.91453  | 0.667017 |
| 150 | 0.641026 | 0.974359 | 0.918803 | 0.685994 |
| 151 | 0.641026 | 0.974359 | 0.918803 | 0.685994 |
| 152 | 0.615385 | 0.974359 | 0.91453  | 0.667017 |
| 153 | 0.641026 | 0.974359 | 0.918803 | 0.685994 |
| 154 | 0.641026 | 0.974359 | 0.918803 | 0.685994 |
| 155 | 0.641026 | 0.969231 | 0.91453  | 0.670862 |
| 156 | 0.615385 | 0.974359 | 0.91453  | 0.667017 |
| 157 | 0.615385 | 0.974359 | 0.91453  | 0.667017 |
| 158 | 0.615385 | 0.974359 | 0.91453  | 0.667017 |
| 159 | 0.641026 | 0.969231 | 0.91453  | 0.670862 |

|     |          |          |          |          |
|-----|----------|----------|----------|----------|
| 160 | 0.641026 | 0.969231 | 0.91453  | 0.670862 |
| 161 | 0.641026 | 0.964103 | 0.910256 | 0.656366 |
| 162 | 0.641026 | 0.964103 | 0.910256 | 0.656366 |
| 163 | 0.641026 | 0.964103 | 0.910256 | 0.656366 |
| 164 | 0.615385 | 0.964103 | 0.905983 | 0.637037 |
| 165 | 0.641026 | 0.969231 | 0.91453  | 0.670862 |
| 166 | 0.641026 | 0.964103 | 0.910256 | 0.656366 |
| 167 | 0.641026 | 0.964103 | 0.910256 | 0.656366 |
| 168 | 0.641026 | 0.964103 | 0.910256 | 0.656366 |
| 169 | 0.641026 | 0.964103 | 0.910256 | 0.656366 |
| 170 | 0.641026 | 0.969231 | 0.91453  | 0.670862 |
| 171 | 0.641026 | 0.969231 | 0.91453  | 0.670862 |
| 172 | 0.641026 | 0.969231 | 0.91453  | 0.670862 |
| 173 | 0.615385 | 0.969231 | 0.910256 | 0.651695 |
| 174 | 0.615385 | 0.969231 | 0.910256 | 0.651695 |
| 175 | 0.615385 | 0.969231 | 0.910256 | 0.651695 |
| 176 | 0.615385 | 0.969231 | 0.910256 | 0.651695 |
| 177 | 0.641026 | 0.969231 | 0.91453  | 0.670862 |
| 178 | 0.641026 | 0.969231 | 0.91453  | 0.670862 |
| 179 | 0.615385 | 0.969231 | 0.910256 | 0.651695 |
| 180 | 0.666667 | 0.964103 | 0.91453  | 0.675406 |
| 181 | 0.641026 | 0.964103 | 0.910256 | 0.656366 |
| 182 | 0.641026 | 0.964103 | 0.910256 | 0.656366 |
| 183 | 0.641026 | 0.964103 | 0.910256 | 0.656366 |
| 184 | 0.641026 | 0.964103 | 0.910256 | 0.656366 |
| 185 | 0.641026 | 0.964103 | 0.910256 | 0.656366 |
| 186 | 0.666667 | 0.964103 | 0.91453  | 0.675406 |
| 187 | 0.641026 | 0.964103 | 0.910256 | 0.656366 |
| 188 | 0.641026 | 0.964103 | 0.910256 | 0.656366 |
| 189 | 0.641026 | 0.964103 | 0.910256 | 0.656366 |
| 190 | 0.641026 | 0.964103 | 0.910256 | 0.656366 |
| 191 | 0.641026 | 0.964103 | 0.910256 | 0.656366 |
| 192 | 0.641026 | 0.964103 | 0.910256 | 0.656366 |
| 193 | 0.641026 | 0.964103 | 0.910256 | 0.656366 |
| 194 | 0.641026 | 0.964103 | 0.910256 | 0.656366 |
| 195 | 0.641026 | 0.964103 | 0.910256 | 0.656366 |
| 196 | 0.641026 | 0.964103 | 0.910256 | 0.656366 |
| 197 | 0.615385 | 0.964103 | 0.905983 | 0.637037 |
| 198 | 0.615385 | 0.964103 | 0.905983 | 0.637037 |
| 199 | 0.641026 | 0.964103 | 0.910256 | 0.656366 |
| 200 | 0.641026 | 0.964103 | 0.910256 | 0.656366 |
| 201 | 0.641026 | 0.964103 | 0.910256 | 0.656366 |
| 202 | 0.641026 | 0.964103 | 0.910256 | 0.656366 |

|     |          |          |          |          |
|-----|----------|----------|----------|----------|
| 203 | 0.641026 | 0.964103 | 0.910256 | 0.656366 |
| 204 | 0.641026 | 0.964103 | 0.910256 | 0.656366 |
| 205 | 0.641026 | 0.964103 | 0.910256 | 0.656366 |
| 206 | 0.641026 | 0.964103 | 0.910256 | 0.656366 |
| 207 | 0.641026 | 0.964103 | 0.910256 | 0.656366 |
| 208 | 0.666667 | 0.964103 | 0.91453  | 0.675406 |
| 209 | 0.666667 | 0.964103 | 0.91453  | 0.675406 |
| 210 | 0.666667 | 0.964103 | 0.91453  | 0.675406 |
| 211 | 0.666667 | 0.964103 | 0.91453  | 0.675406 |
| 212 | 0.666667 | 0.964103 | 0.91453  | 0.675406 |
| 213 | 0.666667 | 0.964103 | 0.91453  | 0.675406 |
| 214 | 0.666667 | 0.964103 | 0.91453  | 0.675406 |
| 215 | 0.666667 | 0.964103 | 0.91453  | 0.675406 |
| 216 | 0.666667 | 0.964103 | 0.91453  | 0.675406 |
| 217 | 0.666667 | 0.964103 | 0.91453  | 0.675406 |
| 218 | 0.666667 | 0.964103 | 0.91453  | 0.675406 |
| 219 | 0.666667 | 0.958974 | 0.910256 | 0.661638 |
| 220 | 0.666667 | 0.958974 | 0.910256 | 0.661638 |
| 221 | 0.666667 | 0.958974 | 0.910256 | 0.661638 |
| 222 | 0.666667 | 0.958974 | 0.910256 | 0.661638 |
| 223 | 0.666667 | 0.958974 | 0.910256 | 0.661638 |
| 224 | 0.666667 | 0.958974 | 0.910256 | 0.661638 |
| 225 | 0.641026 | 0.958974 | 0.905983 | 0.64246  |
| 226 | 0.641026 | 0.958974 | 0.905983 | 0.64246  |
| 227 | 0.641026 | 0.958974 | 0.905983 | 0.64246  |
| 228 | 0.641026 | 0.958974 | 0.905983 | 0.64246  |
| 229 | 0.666667 | 0.958974 | 0.910256 | 0.661638 |
| 230 | 0.692308 | 0.958974 | 0.91453  | 0.680547 |
| 231 | 0.692308 | 0.958974 | 0.91453  | 0.680547 |
| 232 | 0.641026 | 0.958974 | 0.905983 | 0.64246  |
| 233 | 0.641026 | 0.958974 | 0.905983 | 0.64246  |
| 234 | 0.641026 | 0.958974 | 0.905983 | 0.64246  |
| 235 | 0.641026 | 0.958974 | 0.905983 | 0.64246  |
| 236 | 0.641026 | 0.958974 | 0.905983 | 0.64246  |
| 237 | 0.641026 | 0.958974 | 0.905983 | 0.64246  |
| 238 | 0.666667 | 0.958974 | 0.910256 | 0.661638 |
| 239 | 0.666667 | 0.958974 | 0.910256 | 0.661638 |
| 240 | 0.666667 | 0.958974 | 0.910256 | 0.661638 |
| 241 | 0.666667 | 0.958974 | 0.910256 | 0.661638 |
| 242 | 0.692308 | 0.958974 | 0.91453  | 0.680547 |
| 243 | 0.666667 | 0.964103 | 0.91453  | 0.675406 |
| 244 | 0.641026 | 0.958974 | 0.905983 | 0.64246  |
| 245 | 0.641026 | 0.958974 | 0.905983 | 0.64246  |



|     |          |          |          |          |
|-----|----------|----------|----------|----------|
| 246 | 0.615385 | 0.953846 | 0.897436 | 0.609513 |
| 247 | 0.641026 | 0.953846 | 0.901709 | 0.629098 |
| 248 | 0.615385 | 0.953846 | 0.897436 | 0.609513 |
| 249 | 0.615385 | 0.948718 | 0.893162 | 0.596559 |
| 250 | 0.641026 | 0.953846 | 0.901709 | 0.629098 |
| 251 | 0.641026 | 0.953846 | 0.901709 | 0.629098 |
| 252 | 0.641026 | 0.953846 | 0.901709 | 0.629098 |
| 253 | 0.641026 | 0.948718 | 0.897436 | 0.616243 |
| 254 | 0.641026 | 0.948718 | 0.897436 | 0.616243 |
| 255 | 0.641026 | 0.948718 | 0.897436 | 0.616243 |
| 256 | 0.641026 | 0.948718 | 0.897436 | 0.616243 |
| 257 | 0.641026 | 0.948718 | 0.897436 | 0.616243 |
| 258 | 0.641026 | 0.958974 | 0.905983 | 0.64246  |
| 259 | 0.641026 | 0.958974 | 0.905983 | 0.64246  |
| 260 | 0.641026 | 0.958974 | 0.905983 | 0.64246  |
| 261 | 0.641026 | 0.958974 | 0.905983 | 0.64246  |
| 262 | 0.641026 | 0.953846 | 0.901709 | 0.629098 |
| 263 | 0.641026 | 0.953846 | 0.901709 | 0.629098 |
| 264 | 0.641026 | 0.953846 | 0.901709 | 0.629098 |
| 265 | 0.641026 | 0.958974 | 0.905983 | 0.64246  |
| 266 | 0.641026 | 0.958974 | 0.905983 | 0.64246  |
| 267 | 0.641026 | 0.958974 | 0.905983 | 0.64246  |
| 268 | 0.641026 | 0.958974 | 0.905983 | 0.64246  |
| 269 | 0.641026 | 0.958974 | 0.905983 | 0.64246  |
| 270 | 0.641026 | 0.958974 | 0.905983 | 0.64246  |
| 271 | 0.615385 | 0.958974 | 0.901709 | 0.622992 |
| 272 | 0.615385 | 0.958974 | 0.901709 | 0.622992 |
| 273 | 0.615385 | 0.948718 | 0.893162 | 0.596559 |
| 274 | 0.615385 | 0.953846 | 0.897436 | 0.609513 |
| 275 | 0.615385 | 0.953846 | 0.897436 | 0.609513 |
| 276 | 0.615385 | 0.953846 | 0.897436 | 0.609513 |
| 277 | 0.615385 | 0.953846 | 0.897436 | 0.609513 |
| 278 | 0.615385 | 0.948718 | 0.893162 | 0.596559 |
| 279 | 0.615385 | 0.948718 | 0.893162 | 0.596559 |
| 280 | 0.615385 | 0.948718 | 0.893162 | 0.596559 |
| 281 | 0.615385 | 0.948718 | 0.893162 | 0.596559 |
| 282 | 0.615385 | 0.948718 | 0.893162 | 0.596559 |
| 283 | 0.615385 | 0.948718 | 0.893162 | 0.596559 |
| 284 | 0.615385 | 0.948718 | 0.893162 | 0.596559 |
| 285 | 0.615385 | 0.948718 | 0.893162 | 0.596559 |
| 286 | 0.641026 | 0.948718 | 0.897436 | 0.616243 |
| 287 | 0.641026 | 0.948718 | 0.897436 | 0.616243 |
| 288 | 0.641026 | 0.948718 | 0.897436 | 0.616243 |

|     |          |          |          |          |
|-----|----------|----------|----------|----------|
| 289 | 0.641026 | 0.948718 | 0.897436 | 0.616243 |
| 290 | 0.615385 | 0.948718 | 0.893162 | 0.596559 |
| 291 | 0.615385 | 0.948718 | 0.893162 | 0.596559 |
| 292 | 0.615385 | 0.948718 | 0.893162 | 0.596559 |
| 293 | 0.615385 | 0.948718 | 0.893162 | 0.596559 |
| 294 | 0.615385 | 0.948718 | 0.893162 | 0.596559 |
| 295 | 0.615385 | 0.94359  | 0.888889 | 0.584092 |
| 296 | 0.615385 | 0.94359  | 0.888889 | 0.584092 |
| 297 | 0.615385 | 0.94359  | 0.888889 | 0.584092 |
| 298 | 0.641026 | 0.94359  | 0.893162 | 0.60386  |
| 299 | 0.641026 | 0.94359  | 0.893162 | 0.60386  |
| 300 | 0.641026 | 0.94359  | 0.893162 | 0.60386  |
| 301 | 0.641026 | 0.94359  | 0.893162 | 0.60386  |
| 302 | 0.641026 | 0.948718 | 0.897436 | 0.616243 |
| 303 | 0.641026 | 0.948718 | 0.897436 | 0.616243 |
| 304 | 0.641026 | 0.948718 | 0.897436 | 0.616243 |
| 305 | 0.641026 | 0.948718 | 0.897436 | 0.616243 |
| 306 | 0.641026 | 0.948718 | 0.897436 | 0.616243 |
| 307 | 0.641026 | 0.948718 | 0.897436 | 0.616243 |
| 308 | 0.641026 | 0.948718 | 0.897436 | 0.616243 |
| 309 | 0.641026 | 0.948718 | 0.897436 | 0.616243 |
| 310 | 0.641026 | 0.948718 | 0.897436 | 0.616243 |
| 311 | 0.641026 | 0.948718 | 0.897436 | 0.616243 |
| 312 | 0.641026 | 0.948718 | 0.897436 | 0.616243 |
| 313 | 0.641026 | 0.948718 | 0.897436 | 0.616243 |
| 314 | 0.641026 | 0.948718 | 0.897436 | 0.616243 |
| 315 | 0.641026 | 0.948718 | 0.897436 | 0.616243 |
| 316 | 0.641026 | 0.948718 | 0.897436 | 0.616243 |
| 317 | 0.641026 | 0.948718 | 0.897436 | 0.616243 |
| 318 | 0.641026 | 0.948718 | 0.897436 | 0.616243 |
| 319 | 0.641026 | 0.948718 | 0.897436 | 0.616243 |
| 320 | 0.641026 | 0.94359  | 0.893162 | 0.60386  |
| 321 | 0.641026 | 0.948718 | 0.897436 | 0.616243 |
| 322 | 0.641026 | 0.94359  | 0.893162 | 0.60386  |
| 323 | 0.641026 | 0.948718 | 0.897436 | 0.616243 |
| 324 | 0.641026 | 0.948718 | 0.897436 | 0.616243 |
| 325 | 0.641026 | 0.948718 | 0.897436 | 0.616243 |
| 326 | 0.641026 | 0.948718 | 0.897436 | 0.616243 |
| 327 | 0.641026 | 0.948718 | 0.897436 | 0.616243 |
| 328 | 0.641026 | 0.948718 | 0.897436 | 0.616243 |
| 329 | 0.641026 | 0.948718 | 0.897436 | 0.616243 |
| 330 | 0.641026 | 0.948718 | 0.897436 | 0.616243 |
| 331 | 0.641026 | 0.948718 | 0.897436 | 0.616243 |

|     |          |          |          |          |
|-----|----------|----------|----------|----------|
| 332 | 0.641026 | 0.94359  | 0.893162 | 0.60386  |
| 333 | 0.641026 | 0.94359  | 0.893162 | 0.60386  |
| 334 | 0.641026 | 0.94359  | 0.893162 | 0.60386  |
| 335 | 0.641026 | 0.94359  | 0.893162 | 0.60386  |
| 336 | 0.641026 | 0.94359  | 0.893162 | 0.60386  |
| 337 | 0.641026 | 0.94359  | 0.893162 | 0.60386  |
| 338 | 0.641026 | 0.94359  | 0.893162 | 0.60386  |
| 339 | 0.641026 | 0.938462 | 0.888889 | 0.591915 |
| 340 | 0.641026 | 0.938462 | 0.888889 | 0.591915 |
| 341 | 0.641026 | 0.938462 | 0.888889 | 0.591915 |
| 342 | 0.641026 | 0.938462 | 0.888889 | 0.591915 |
| 343 | 0.641026 | 0.938462 | 0.888889 | 0.591915 |
| 344 | 0.641026 | 0.933333 | 0.884615 | 0.580381 |
| 345 | 0.666667 | 0.933333 | 0.888889 | 0.6      |
| 346 | 0.666667 | 0.933333 | 0.888889 | 0.6      |
| 347 | 0.666667 | 0.933333 | 0.888889 | 0.6      |
| 348 | 0.666667 | 0.933333 | 0.888889 | 0.6      |
| 349 | 0.666667 | 0.933333 | 0.888889 | 0.6      |
| 350 | 0.641026 | 0.933333 | 0.884615 | 0.580381 |
| 351 | 0.641026 | 0.933333 | 0.884615 | 0.580381 |
| 352 | 0.641026 | 0.933333 | 0.884615 | 0.580381 |
| 353 | 0.641026 | 0.933333 | 0.884615 | 0.580381 |
| 354 | 0.641026 | 0.933333 | 0.884615 | 0.580381 |
| 355 | 0.641026 | 0.933333 | 0.884615 | 0.580381 |
| 356 | 0.641026 | 0.933333 | 0.884615 | 0.580381 |
| 357 | 0.641026 | 0.933333 | 0.884615 | 0.580381 |
| 358 | 0.666667 | 0.948718 | 0.901709 | 0.635642 |
| 359 | 0.666667 | 0.948718 | 0.901709 | 0.635642 |
| 360 | 0.666667 | 0.948718 | 0.901709 | 0.635642 |
| 361 | 0.666667 | 0.948718 | 0.901709 | 0.635642 |
| 362 | 0.666667 | 0.953846 | 0.905983 | 0.648395 |
| 363 | 0.666667 | 0.953846 | 0.905983 | 0.648395 |
| 364 | 0.666667 | 0.953846 | 0.905983 | 0.648395 |
| 365 | 0.666667 | 0.948718 | 0.901709 | 0.635642 |
| 366 | 0.666667 | 0.953846 | 0.905983 | 0.648395 |
| 367 | 0.666667 | 0.948718 | 0.901709 | 0.635642 |
| 368 | 0.666667 | 0.948718 | 0.901709 | 0.635642 |
| 369 | 0.666667 | 0.948718 | 0.901709 | 0.635642 |
| 370 | 0.666667 | 0.953846 | 0.905983 | 0.648395 |
| 371 | 0.666667 | 0.953846 | 0.905983 | 0.648395 |
| 372 | 0.666667 | 0.953846 | 0.905983 | 0.648395 |
| 373 | 0.666667 | 0.953846 | 0.905983 | 0.648395 |
| 374 | 0.666667 | 0.938462 | 0.893162 | 0.611473 |

|     |          |          |          |          |
|-----|----------|----------|----------|----------|
| 375 | 0.666667 | 0.938462 | 0.893162 | 0.611473 |
| 376 | 0.666667 | 0.938462 | 0.893162 | 0.611473 |
| 377 | 0.666667 | 0.938462 | 0.893162 | 0.611473 |
| 378 | 0.666667 | 0.938462 | 0.893162 | 0.611473 |
| 379 | 0.666667 | 0.938462 | 0.893162 | 0.611473 |
| 380 | 0.666667 | 0.938462 | 0.893162 | 0.611473 |
| 381 | 0.666667 | 0.938462 | 0.893162 | 0.611473 |
| 382 | 0.666667 | 0.938462 | 0.893162 | 0.611473 |
| 383 | 0.666667 | 0.938462 | 0.893162 | 0.611473 |
| 384 | 0.666667 | 0.933333 | 0.888889 | 0.6      |
| 385 | 0.666667 | 0.94359  | 0.897436 | 0.623344 |
| 386 | 0.666667 | 0.94359  | 0.897436 | 0.623344 |
| 387 | 0.666667 | 0.94359  | 0.897436 | 0.623344 |
| 388 | 0.666667 | 0.948718 | 0.901709 | 0.635642 |
| 389 | 0.666667 | 0.948718 | 0.901709 | 0.635642 |
| 390 | 0.666667 | 0.948718 | 0.901709 | 0.635642 |
| 391 | 0.666667 | 0.948718 | 0.901709 | 0.635642 |
| 392 | 0.666667 | 0.948718 | 0.901709 | 0.635642 |
| 393 | 0.666667 | 0.94359  | 0.897436 | 0.623344 |
| 394 | 0.666667 | 0.94359  | 0.897436 | 0.623344 |
| 395 | 0.666667 | 0.94359  | 0.897436 | 0.623344 |
| 396 | 0.666667 | 0.938462 | 0.893162 | 0.611473 |
| 397 | 0.666667 | 0.938462 | 0.893162 | 0.611473 |
| 398 | 0.666667 | 0.938462 | 0.893162 | 0.611473 |
| 399 | 0.666667 | 0.938462 | 0.893162 | 0.611473 |
| 400 | 0.666667 | 0.938462 | 0.893162 | 0.611473 |
| 401 | 0.666667 | 0.94359  | 0.897436 | 0.623344 |
| 402 | 0.666667 | 0.938462 | 0.893162 | 0.611473 |
| 403 | 0.666667 | 0.94359  | 0.897436 | 0.623344 |
| 404 | 0.666667 | 0.94359  | 0.897436 | 0.623344 |
| 405 | 0.666667 | 0.94359  | 0.897436 | 0.623344 |
| 406 | 0.666667 | 0.94359  | 0.897436 | 0.623344 |
| 407 | 0.666667 | 0.94359  | 0.897436 | 0.623344 |
| 408 | 0.666667 | 0.94359  | 0.897436 | 0.623344 |
| 409 | 0.666667 | 0.94359  | 0.897436 | 0.623344 |
| 410 | 0.666667 | 0.94359  | 0.897436 | 0.623344 |
| 411 | 0.666667 | 0.94359  | 0.897436 | 0.623344 |
| 412 | 0.666667 | 0.94359  | 0.897436 | 0.623344 |
| 413 | 0.666667 | 0.94359  | 0.897436 | 0.623344 |
| 414 | 0.666667 | 0.94359  | 0.897436 | 0.623344 |
| 415 | 0.666667 | 0.94359  | 0.897436 | 0.623344 |
| 416 | 0.666667 | 0.94359  | 0.897436 | 0.623344 |
| 417 | 0.666667 | 0.94359  | 0.897436 | 0.623344 |

|     |          |          |          |          |
|-----|----------|----------|----------|----------|
| 418 | 0.666667 | 0.94359  | 0.897436 | 0.623344 |
| 419 | 0.666667 | 0.94359  | 0.897436 | 0.623344 |
| 420 | 0.666667 | 0.94359  | 0.897436 | 0.623344 |
| 421 | 0.666667 | 0.94359  | 0.897436 | 0.623344 |
| 422 | 0.666667 | 0.94359  | 0.897436 | 0.623344 |
| 423 | 0.666667 | 0.94359  | 0.897436 | 0.623344 |
| 424 | 0.666667 | 0.94359  | 0.897436 | 0.623344 |
| 425 | 0.666667 | 0.94359  | 0.897436 | 0.623344 |
| 426 | 0.666667 | 0.94359  | 0.897436 | 0.623344 |
| 427 | 0.666667 | 0.94359  | 0.897436 | 0.623344 |
| 428 | 0.666667 | 0.938462 | 0.893162 | 0.611473 |
| 429 | 0.666667 | 0.938462 | 0.893162 | 0.611473 |
| 430 | 0.666667 | 0.938462 | 0.893162 | 0.611473 |
| 431 | 0.666667 | 0.938462 | 0.893162 | 0.611473 |
| 432 | 0.666667 | 0.938462 | 0.893162 | 0.611473 |
| 433 | 0.666667 | 0.938462 | 0.893162 | 0.611473 |
| 434 | 0.666667 | 0.94359  | 0.897436 | 0.623344 |
| 435 | 0.666667 | 0.94359  | 0.897436 | 0.623344 |
| 436 | 0.666667 | 0.94359  | 0.897436 | 0.623344 |
| 437 | 0.666667 | 0.94359  | 0.897436 | 0.623344 |
| 438 | 0.666667 | 0.94359  | 0.897436 | 0.623344 |
| 439 | 0.666667 | 0.94359  | 0.897436 | 0.623344 |
| 440 | 0.666667 | 0.938462 | 0.893162 | 0.611473 |
| 441 | 0.666667 | 0.938462 | 0.893162 | 0.611473 |
| 442 | 0.666667 | 0.938462 | 0.893162 | 0.611473 |
| 443 | 0.666667 | 0.938462 | 0.893162 | 0.611473 |
| 444 | 0.666667 | 0.938462 | 0.893162 | 0.611473 |
| 445 | 0.666667 | 0.938462 | 0.893162 | 0.611473 |
| 446 | 0.666667 | 0.938462 | 0.893162 | 0.611473 |
| 447 | 0.666667 | 0.938462 | 0.893162 | 0.611473 |
| 448 | 0.666667 | 0.938462 | 0.893162 | 0.611473 |
| 449 | 0.666667 | 0.938462 | 0.893162 | 0.611473 |
| 450 | 0.666667 | 0.938462 | 0.893162 | 0.611473 |
| 451 | 0.666667 | 0.938462 | 0.893162 | 0.611473 |
| 452 | 0.666667 | 0.938462 | 0.893162 | 0.611473 |
| 453 | 0.666667 | 0.938462 | 0.893162 | 0.611473 |
| 454 | 0.666667 | 0.938462 | 0.893162 | 0.611473 |
| 455 | 0.666667 | 0.938462 | 0.893162 | 0.611473 |
| 456 | 0.666667 | 0.948718 | 0.901709 | 0.635642 |
| 457 | 0.666667 | 0.948718 | 0.901709 | 0.635642 |
| 458 | 0.666667 | 0.948718 | 0.901709 | 0.635642 |
| 459 | 0.666667 | 0.948718 | 0.901709 | 0.635642 |
| 460 | 0.666667 | 0.948718 | 0.901709 | 0.635642 |

|     |          |          |          |          |
|-----|----------|----------|----------|----------|
| 461 | 0.666667 | 0.94359  | 0.897436 | 0.623344 |
| 462 | 0.666667 | 0.94359  | 0.897436 | 0.623344 |
| 463 | 0.666667 | 0.948718 | 0.901709 | 0.635642 |
| 464 | 0.666667 | 0.948718 | 0.901709 | 0.635642 |
| 465 | 0.666667 | 0.948718 | 0.901709 | 0.635642 |
| 466 | 0.666667 | 0.948718 | 0.901709 | 0.635642 |
| 467 | 0.666667 | 0.948718 | 0.901709 | 0.635642 |
| 468 | 0.666667 | 0.948718 | 0.901709 | 0.635642 |
| 469 | 0.666667 | 0.948718 | 0.901709 | 0.635642 |
| 470 | 0.666667 | 0.948718 | 0.901709 | 0.635642 |
| 471 | 0.666667 | 0.948718 | 0.901709 | 0.635642 |
| 472 | 0.666667 | 0.948718 | 0.901709 | 0.635642 |
| 473 | 0.666667 | 0.94359  | 0.897436 | 0.623344 |
| 474 | 0.666667 | 0.94359  | 0.897436 | 0.623344 |
| 475 | 0.666667 | 0.94359  | 0.897436 | 0.623344 |
| 476 | 0.666667 | 0.94359  | 0.897436 | 0.623344 |
| 477 | 0.666667 | 0.94359  | 0.897436 | 0.623344 |
| 478 | 0.666667 | 0.94359  | 0.897436 | 0.623344 |
| 479 | 0.666667 | 0.938462 | 0.893162 | 0.611473 |
| 480 | 0.666667 | 0.938462 | 0.893162 | 0.611473 |
| 481 | 0.666667 | 0.938462 | 0.893162 | 0.611473 |
| 482 | 0.666667 | 0.938462 | 0.893162 | 0.611473 |
| 483 | 0.666667 | 0.938462 | 0.893162 | 0.611473 |
| 484 | 0.666667 | 0.938462 | 0.893162 | 0.611473 |
| 485 | 0.666667 | 0.938462 | 0.893162 | 0.611473 |
| 486 | 0.666667 | 0.938462 | 0.893162 | 0.611473 |
| 487 | 0.666667 | 0.938462 | 0.893162 | 0.611473 |
| 488 | 0.666667 | 0.938462 | 0.893162 | 0.611473 |
| 489 | 0.666667 | 0.938462 | 0.893162 | 0.611473 |
| 490 | 0.666667 | 0.938462 | 0.893162 | 0.611473 |
| 491 | 0.666667 | 0.938462 | 0.893162 | 0.611473 |
| 492 | 0.666667 | 0.938462 | 0.893162 | 0.611473 |
| 493 | 0.666667 | 0.938462 | 0.893162 | 0.611473 |
| 494 | 0.666667 | 0.938462 | 0.893162 | 0.611473 |
| 495 | 0.666667 | 0.938462 | 0.893162 | 0.611473 |
| 496 | 0.666667 | 0.938462 | 0.893162 | 0.611473 |
| 497 | 0.666667 | 0.938462 | 0.893162 | 0.611473 |
| 498 | 0.666667 | 0.938462 | 0.893162 | 0.611473 |
| 499 | 0.666667 | 0.938462 | 0.893162 | 0.611473 |
| 500 | 0.666667 | 0.938462 | 0.893162 | 0.611473 |

(7) Dataset  $D_7$

| Number of | SN | SP | ACC | MCC |
|-----------|----|----|-----|-----|
|-----------|----|----|-----|-----|

| features |          |          |          |          |
|----------|----------|----------|----------|----------|
| 4        | 0.487179 | 1        | 0.91453  | 0.664726 |
| 5        | 0.512821 | 1        | 0.918803 | 0.683586 |
| 6        | 0.564103 | 1        | 0.92735  | 0.720325 |
| 7        | 0.615385 | 1        | 0.935897 | 0.755929 |
| 8        | 0.615385 | 1        | 0.935897 | 0.755929 |
| 9        | 0.615385 | 0.989744 | 0.92735  | 0.717594 |
| 10       | 0.641026 | 0.984615 | 0.92735  | 0.718393 |
| 11       | 0.666667 | 0.984615 | 0.931624 | 0.736619 |
| 12       | 0.666667 | 0.979487 | 0.92735  | 0.720294 |
| 13       | 0.641026 | 0.984615 | 0.92735  | 0.718393 |
| 14       | 0.641026 | 0.984615 | 0.92735  | 0.718393 |
| 15       | 0.589744 | 0.989744 | 0.923077 | 0.699118 |
| 16       | 0.615385 | 0.984615 | 0.923077 | 0.699896 |
| 17       | 0.666667 | 0.979487 | 0.92735  | 0.720294 |
| 18       | 0.666667 | 0.979487 | 0.92735  | 0.720294 |
| 19       | 0.692308 | 0.984615 | 0.935897 | 0.754594 |
| 20       | 0.692308 | 0.979487 | 0.931624 | 0.738512 |
| 21       | 0.692308 | 0.984615 | 0.935897 | 0.754594 |
| 22       | 0.692308 | 0.984615 | 0.935897 | 0.754594 |
| 23       | 0.692308 | 0.984615 | 0.935897 | 0.754594 |
| 24       | 0.692308 | 0.984615 | 0.935897 | 0.754594 |
| 25       | 0.692308 | 0.984615 | 0.935897 | 0.754594 |
| 26       | 0.666667 | 0.984615 | 0.931624 | 0.736619 |
| 27       | 0.666667 | 0.984615 | 0.931624 | 0.736619 |
| 28       | 0.666667 | 0.984615 | 0.931624 | 0.736619 |
| 29       | 0.666667 | 0.979487 | 0.92735  | 0.720294 |
| 30       | 0.666667 | 0.979487 | 0.92735  | 0.720294 |
| 31       | 0.692308 | 0.989744 | 0.940171 | 0.77142  |
| 32       | 0.692308 | 0.989744 | 0.940171 | 0.77142  |
| 33       | 0.692308 | 0.984615 | 0.935897 | 0.754594 |
| 34       | 0.692308 | 0.989744 | 0.940171 | 0.77142  |
| 35       | 0.692308 | 0.989744 | 0.940171 | 0.77142  |
| 36       | 0.692308 | 0.984615 | 0.935897 | 0.754594 |
| 37       | 0.692308 | 0.984615 | 0.935897 | 0.754594 |
| 38       | 0.692308 | 0.984615 | 0.935897 | 0.754594 |
| 39       | 0.692308 | 0.984615 | 0.935897 | 0.754594 |
| 40       | 0.692308 | 0.984615 | 0.935897 | 0.754594 |
| 41       | 0.692308 | 0.984615 | 0.935897 | 0.754594 |
| 42       | 0.692308 | 0.984615 | 0.935897 | 0.754594 |
| 43       | 0.692308 | 0.984615 | 0.935897 | 0.754594 |
| 44       | 0.666667 | 0.984615 | 0.931624 | 0.736619 |
| 45       | 0.666667 | 0.984615 | 0.931624 | 0.736619 |

|    |          |          |          |          |
|----|----------|----------|----------|----------|
| 46 | 0.666667 | 0.984615 | 0.931624 | 0.736619 |
| 47 | 0.666667 | 0.984615 | 0.931624 | 0.736619 |
| 48 | 0.666667 | 0.984615 | 0.931624 | 0.736619 |
| 49 | 0.666667 | 0.979487 | 0.92735  | 0.720294 |
| 50 | 0.666667 | 0.979487 | 0.92735  | 0.720294 |
| 51 | 0.666667 | 0.979487 | 0.92735  | 0.720294 |
| 52 | 0.615385 | 0.979487 | 0.918803 | 0.683062 |
| 53 | 0.641026 | 0.979487 | 0.923077 | 0.701818 |
| 54 | 0.641026 | 0.979487 | 0.923077 | 0.701818 |
| 55 | 0.641026 | 0.979487 | 0.923077 | 0.701818 |
| 56 | 0.641026 | 0.979487 | 0.923077 | 0.701818 |
| 57 | 0.641026 | 0.979487 | 0.923077 | 0.701818 |
| 58 | 0.641026 | 0.979487 | 0.923077 | 0.701818 |
| 59 | 0.641026 | 0.979487 | 0.923077 | 0.701818 |
| 60 | 0.641026 | 0.979487 | 0.923077 | 0.701818 |
| 61 | 0.641026 | 0.979487 | 0.923077 | 0.701818 |
| 62 | 0.641026 | 0.979487 | 0.923077 | 0.701818 |
| 63 | 0.641026 | 0.979487 | 0.923077 | 0.701818 |
| 64 | 0.641026 | 0.979487 | 0.923077 | 0.701818 |
| 65 | 0.615385 | 0.974359 | 0.91453  | 0.667017 |
| 66 | 0.641026 | 0.974359 | 0.918803 | 0.685994 |
| 67 | 0.615385 | 0.974359 | 0.91453  | 0.667017 |
| 68 | 0.615385 | 0.969231 | 0.910256 | 0.651695 |
| 69 | 0.641026 | 0.969231 | 0.91453  | 0.670862 |
| 70 | 0.615385 | 0.969231 | 0.910256 | 0.651695 |
| 71 | 0.615385 | 0.969231 | 0.910256 | 0.651695 |
| 72 | 0.615385 | 0.969231 | 0.910256 | 0.651695 |
| 73 | 0.615385 | 0.969231 | 0.910256 | 0.651695 |
| 74 | 0.641026 | 0.969231 | 0.91453  | 0.670862 |
| 75 | 0.641026 | 0.974359 | 0.918803 | 0.685994 |
| 76 | 0.641026 | 0.974359 | 0.918803 | 0.685994 |
| 77 | 0.615385 | 0.979487 | 0.918803 | 0.683062 |
| 78 | 0.615385 | 0.974359 | 0.91453  | 0.667017 |
| 79 | 0.666667 | 0.974359 | 0.923077 | 0.704687 |
| 80 | 0.641026 | 0.974359 | 0.918803 | 0.685994 |
| 81 | 0.666667 | 0.979487 | 0.92735  | 0.720294 |
| 82 | 0.692308 | 0.979487 | 0.931624 | 0.738512 |
| 83 | 0.717949 | 0.974359 | 0.931624 | 0.7413   |
| 84 | 0.717949 | 0.979487 | 0.935897 | 0.75649  |
| 85 | 0.717949 | 0.979487 | 0.935897 | 0.75649  |
| 86 | 0.717949 | 0.979487 | 0.935897 | 0.75649  |
| 87 | 0.717949 | 0.979487 | 0.935897 | 0.75649  |
| 88 | 0.692308 | 0.979487 | 0.931624 | 0.738512 |



|     |          |          |          |          |
|-----|----------|----------|----------|----------|
| 89  | 0.692308 | 0.974359 | 0.92735  | 0.723116 |
| 90  | 0.666667 | 0.974359 | 0.923077 | 0.704687 |
| 91  | 0.666667 | 0.969231 | 0.918803 | 0.689741 |
| 92  | 0.666667 | 0.969231 | 0.918803 | 0.689741 |
| 93  | 0.666667 | 0.964103 | 0.91453  | 0.675406 |
| 94  | 0.666667 | 0.969231 | 0.918803 | 0.689741 |
| 95  | 0.692308 | 0.974359 | 0.92735  | 0.723116 |
| 96  | 0.666667 | 0.969231 | 0.918803 | 0.689741 |
| 97  | 0.666667 | 0.969231 | 0.918803 | 0.689741 |
| 98  | 0.692308 | 0.969231 | 0.923077 | 0.708353 |
| 99  | 0.692308 | 0.974359 | 0.92735  | 0.723116 |
| 100 | 0.692308 | 0.974359 | 0.92735  | 0.723116 |
| 101 | 0.692308 | 0.979487 | 0.931624 | 0.738512 |
| 102 | 0.692308 | 0.979487 | 0.931624 | 0.738512 |
| 103 | 0.692308 | 0.979487 | 0.931624 | 0.738512 |
| 104 | 0.692308 | 0.979487 | 0.931624 | 0.738512 |
| 105 | 0.692308 | 0.974359 | 0.92735  | 0.723116 |
| 106 | 0.692308 | 0.979487 | 0.931624 | 0.738512 |
| 107 | 0.666667 | 0.974359 | 0.923077 | 0.704687 |
| 108 | 0.666667 | 0.969231 | 0.918803 | 0.689741 |
| 109 | 0.666667 | 0.969231 | 0.918803 | 0.689741 |
| 110 | 0.666667 | 0.969231 | 0.918803 | 0.689741 |
| 111 | 0.666667 | 0.969231 | 0.918803 | 0.689741 |
| 112 | 0.717949 | 0.969231 | 0.92735  | 0.726717 |
| 113 | 0.717949 | 0.969231 | 0.92735  | 0.726717 |
| 114 | 0.717949 | 0.969231 | 0.92735  | 0.726717 |
| 115 | 0.717949 | 0.969231 | 0.92735  | 0.726717 |
| 116 | 0.717949 | 0.974359 | 0.931624 | 0.7413   |
| 117 | 0.717949 | 0.974359 | 0.931624 | 0.7413   |
| 118 | 0.717949 | 0.974359 | 0.931624 | 0.7413   |
| 119 | 0.717949 | 0.974359 | 0.931624 | 0.7413   |
| 120 | 0.692308 | 0.974359 | 0.92735  | 0.723116 |
| 121 | 0.717949 | 0.974359 | 0.931624 | 0.7413   |
| 122 | 0.717949 | 0.974359 | 0.931624 | 0.7413   |
| 123 | 0.717949 | 0.974359 | 0.931624 | 0.7413   |
| 124 | 0.717949 | 0.974359 | 0.931624 | 0.7413   |
| 125 | 0.717949 | 0.974359 | 0.931624 | 0.7413   |
| 126 | 0.717949 | 0.979487 | 0.935897 | 0.75649  |
| 127 | 0.717949 | 0.984615 | 0.940171 | 0.772337 |
| 128 | 0.717949 | 0.984615 | 0.940171 | 0.772337 |
| 129 | 0.717949 | 0.984615 | 0.940171 | 0.772337 |
| 130 | 0.717949 | 0.984615 | 0.940171 | 0.772337 |
| 131 | 0.717949 | 0.984615 | 0.940171 | 0.772337 |

|     |          |          |          |          |
|-----|----------|----------|----------|----------|
| 132 | 0.717949 | 0.984615 | 0.940171 | 0.772337 |
| 133 | 0.717949 | 0.984615 | 0.940171 | 0.772337 |
| 134 | 0.717949 | 0.984615 | 0.940171 | 0.772337 |
| 135 | 0.717949 | 0.984615 | 0.940171 | 0.772337 |
| 136 | 0.717949 | 0.989744 | 0.944444 | 0.788893 |
| 137 | 0.717949 | 0.989744 | 0.944444 | 0.788893 |
| 138 | 0.717949 | 0.989744 | 0.944444 | 0.788893 |
| 139 | 0.717949 | 0.989744 | 0.944444 | 0.788893 |
| 140 | 0.717949 | 0.989744 | 0.944444 | 0.788893 |
| 141 | 0.717949 | 0.989744 | 0.944444 | 0.788893 |
| 142 | 0.717949 | 0.989744 | 0.944444 | 0.788893 |
| 143 | 0.717949 | 0.989744 | 0.944444 | 0.788893 |
| 144 | 0.717949 | 0.989744 | 0.944444 | 0.788893 |
| 145 | 0.717949 | 0.989744 | 0.944444 | 0.788893 |
| 146 | 0.717949 | 0.989744 | 0.944444 | 0.788893 |
| 147 | 0.717949 | 0.989744 | 0.944444 | 0.788893 |
| 148 | 0.717949 | 0.989744 | 0.944444 | 0.788893 |
| 149 | 0.717949 | 0.989744 | 0.944444 | 0.788893 |
| 150 | 0.717949 | 0.989744 | 0.944444 | 0.788893 |
| 151 | 0.717949 | 0.989744 | 0.944444 | 0.788893 |
| 152 | 0.717949 | 0.989744 | 0.944444 | 0.788893 |
| 153 | 0.717949 | 0.989744 | 0.944444 | 0.788893 |
| 154 | 0.717949 | 0.989744 | 0.944444 | 0.788893 |
| 155 | 0.717949 | 0.984615 | 0.940171 | 0.772337 |
| 156 | 0.717949 | 0.979487 | 0.935897 | 0.75649  |
| 157 | 0.717949 | 0.979487 | 0.935897 | 0.75649  |
| 158 | 0.717949 | 0.979487 | 0.935897 | 0.75649  |
| 159 | 0.692308 | 0.979487 | 0.931624 | 0.738512 |
| 160 | 0.692308 | 0.979487 | 0.931624 | 0.738512 |
| 161 | 0.692308 | 0.979487 | 0.931624 | 0.738512 |
| 162 | 0.717949 | 0.979487 | 0.935897 | 0.75649  |
| 163 | 0.717949 | 0.984615 | 0.940171 | 0.772337 |
| 164 | 0.717949 | 0.984615 | 0.940171 | 0.772337 |
| 165 | 0.717949 | 0.979487 | 0.935897 | 0.75649  |
| 166 | 0.717949 | 0.979487 | 0.935897 | 0.75649  |
| 167 | 0.717949 | 0.984615 | 0.940171 | 0.772337 |
| 168 | 0.717949 | 0.984615 | 0.940171 | 0.772337 |
| 169 | 0.717949 | 0.984615 | 0.940171 | 0.772337 |
| 170 | 0.717949 | 0.984615 | 0.940171 | 0.772337 |
| 171 | 0.717949 | 0.984615 | 0.940171 | 0.772337 |
| 172 | 0.717949 | 0.984615 | 0.940171 | 0.772337 |
| 173 | 0.717949 | 0.984615 | 0.940171 | 0.772337 |
| 174 | 0.717949 | 0.984615 | 0.940171 | 0.772337 |

|     |          |          |          |          |
|-----|----------|----------|----------|----------|
| 175 | 0.717949 | 0.984615 | 0.940171 | 0.772337 |
| 176 | 0.717949 | 0.984615 | 0.940171 | 0.772337 |
| 177 | 0.717949 | 0.984615 | 0.940171 | 0.772337 |
| 178 | 0.717949 | 0.989744 | 0.944444 | 0.788893 |
| 179 | 0.717949 | 0.984615 | 0.940171 | 0.772337 |
| 180 | 0.717949 | 0.984615 | 0.940171 | 0.772337 |
| 181 | 0.717949 | 0.984615 | 0.940171 | 0.772337 |
| 182 | 0.717949 | 0.989744 | 0.944444 | 0.788893 |
| 183 | 0.717949 | 0.989744 | 0.944444 | 0.788893 |
| 184 | 0.717949 | 0.989744 | 0.944444 | 0.788893 |
| 185 | 0.717949 | 0.984615 | 0.940171 | 0.772337 |
| 186 | 0.717949 | 0.984615 | 0.940171 | 0.772337 |
| 187 | 0.717949 | 0.979487 | 0.935897 | 0.75649  |
| 188 | 0.717949 | 0.984615 | 0.940171 | 0.772337 |
| 189 | 0.717949 | 0.974359 | 0.931624 | 0.7413   |
| 190 | 0.717949 | 0.974359 | 0.931624 | 0.7413   |
| 191 | 0.717949 | 0.979487 | 0.935897 | 0.75649  |
| 192 | 0.717949 | 0.984615 | 0.940171 | 0.772337 |
| 193 | 0.717949 | 0.984615 | 0.940171 | 0.772337 |
| 194 | 0.692308 | 0.974359 | 0.92735  | 0.723116 |
| 195 | 0.692308 | 0.974359 | 0.92735  | 0.723116 |
| 196 | 0.692308 | 0.974359 | 0.92735  | 0.723116 |
| 197 | 0.692308 | 0.974359 | 0.92735  | 0.723116 |
| 198 | 0.666667 | 0.974359 | 0.923077 | 0.704687 |
| 199 | 0.666667 | 0.974359 | 0.923077 | 0.704687 |
| 200 | 0.666667 | 0.974359 | 0.923077 | 0.704687 |
| 201 | 0.666667 | 0.974359 | 0.923077 | 0.704687 |
| 202 | 0.692308 | 0.969231 | 0.923077 | 0.708353 |
| 203 | 0.692308 | 0.969231 | 0.923077 | 0.708353 |
| 204 | 0.692308 | 0.969231 | 0.923077 | 0.708353 |
| 205 | 0.692308 | 0.969231 | 0.923077 | 0.708353 |
| 206 | 0.692308 | 0.969231 | 0.923077 | 0.708353 |
| 207 | 0.692308 | 0.969231 | 0.923077 | 0.708353 |
| 208 | 0.692308 | 0.969231 | 0.923077 | 0.708353 |
| 209 | 0.692308 | 0.969231 | 0.923077 | 0.708353 |
| 210 | 0.692308 | 0.969231 | 0.923077 | 0.708353 |
| 211 | 0.692308 | 0.969231 | 0.923077 | 0.708353 |
| 212 | 0.692308 | 0.974359 | 0.92735  | 0.723116 |
| 213 | 0.692308 | 0.974359 | 0.92735  | 0.723116 |
| 214 | 0.692308 | 0.974359 | 0.92735  | 0.723116 |
| 215 | 0.692308 | 0.974359 | 0.92735  | 0.723116 |
| 216 | 0.692308 | 0.974359 | 0.92735  | 0.723116 |
| 217 | 0.692308 | 0.974359 | 0.92735  | 0.723116 |

|     |          |          |          |          |
|-----|----------|----------|----------|----------|
| 218 | 0.692308 | 0.974359 | 0.92735  | 0.723116 |
| 219 | 0.692308 | 0.974359 | 0.92735  | 0.723116 |
| 220 | 0.692308 | 0.974359 | 0.92735  | 0.723116 |
| 221 | 0.717949 | 0.974359 | 0.931624 | 0.7413   |
| 222 | 0.717949 | 0.974359 | 0.931624 | 0.7413   |
| 223 | 0.717949 | 0.974359 | 0.931624 | 0.7413   |
| 224 | 0.717949 | 0.974359 | 0.931624 | 0.7413   |
| 225 | 0.692308 | 0.974359 | 0.92735  | 0.723116 |
| 226 | 0.692308 | 0.974359 | 0.92735  | 0.723116 |
| 227 | 0.692308 | 0.979487 | 0.931624 | 0.738512 |
| 228 | 0.692308 | 0.979487 | 0.931624 | 0.738512 |
| 229 | 0.692308 | 0.984615 | 0.935897 | 0.754594 |
| 230 | 0.692308 | 0.979487 | 0.931624 | 0.738512 |
| 231 | 0.692308 | 0.979487 | 0.931624 | 0.738512 |
| 232 | 0.666667 | 0.984615 | 0.931624 | 0.736619 |
| 233 | 0.666667 | 0.984615 | 0.931624 | 0.736619 |
| 234 | 0.666667 | 0.979487 | 0.92735  | 0.720294 |
| 235 | 0.692308 | 0.979487 | 0.931624 | 0.738512 |
| 236 | 0.692308 | 0.979487 | 0.931624 | 0.738512 |
| 237 | 0.692308 | 0.979487 | 0.931624 | 0.738512 |
| 238 | 0.692308 | 0.984615 | 0.935897 | 0.754594 |
| 239 | 0.692308 | 0.984615 | 0.935897 | 0.754594 |
| 240 | 0.717949 | 0.984615 | 0.940171 | 0.772337 |
| 241 | 0.717949 | 0.984615 | 0.940171 | 0.772337 |
| 242 | 0.717949 | 0.984615 | 0.940171 | 0.772337 |
| 243 | 0.692308 | 0.984615 | 0.935897 | 0.754594 |
| 244 | 0.692308 | 0.984615 | 0.935897 | 0.754594 |
| 245 | 0.666667 | 0.974359 | 0.923077 | 0.704687 |
| 246 | 0.666667 | 0.974359 | 0.923077 | 0.704687 |
| 247 | 0.666667 | 0.974359 | 0.923077 | 0.704687 |
| 248 | 0.666667 | 0.974359 | 0.923077 | 0.704687 |
| 249 | 0.666667 | 0.974359 | 0.923077 | 0.704687 |
| 250 | 0.666667 | 0.969231 | 0.918803 | 0.689741 |
| 251 | 0.666667 | 0.974359 | 0.923077 | 0.704687 |
| 252 | 0.666667 | 0.974359 | 0.923077 | 0.704687 |
| 253 | 0.666667 | 0.974359 | 0.923077 | 0.704687 |
| 254 | 0.666667 | 0.974359 | 0.923077 | 0.704687 |
| 255 | 0.666667 | 0.974359 | 0.923077 | 0.704687 |
| 256 | 0.666667 | 0.974359 | 0.923077 | 0.704687 |
| 257 | 0.666667 | 0.974359 | 0.923077 | 0.704687 |
| 258 | 0.666667 | 0.974359 | 0.923077 | 0.704687 |
| 259 | 0.666667 | 0.974359 | 0.923077 | 0.704687 |
| 260 | 0.666667 | 0.974359 | 0.923077 | 0.704687 |

|     |          |          |          |          |
|-----|----------|----------|----------|----------|
| 261 | 0.666667 | 0.974359 | 0.923077 | 0.704687 |
| 262 | 0.666667 | 0.974359 | 0.923077 | 0.704687 |
| 263 | 0.666667 | 0.974359 | 0.923077 | 0.704687 |
| 264 | 0.666667 | 0.974359 | 0.923077 | 0.704687 |
| 265 | 0.666667 | 0.974359 | 0.923077 | 0.704687 |
| 266 | 0.666667 | 0.974359 | 0.923077 | 0.704687 |
| 267 | 0.666667 | 0.974359 | 0.923077 | 0.704687 |
| 268 | 0.666667 | 0.974359 | 0.923077 | 0.704687 |
| 269 | 0.666667 | 0.974359 | 0.923077 | 0.704687 |
| 270 | 0.666667 | 0.974359 | 0.923077 | 0.704687 |
| 271 | 0.692308 | 0.974359 | 0.92735  | 0.723116 |
| 272 | 0.692308 | 0.974359 | 0.92735  | 0.723116 |
| 273 | 0.692308 | 0.979487 | 0.931624 | 0.738512 |
| 274 | 0.692308 | 0.979487 | 0.931624 | 0.738512 |
| 275 | 0.692308 | 0.979487 | 0.931624 | 0.738512 |
| 276 | 0.666667 | 0.979487 | 0.92735  | 0.720294 |
| 277 | 0.666667 | 0.979487 | 0.92735  | 0.720294 |
| 278 | 0.666667 | 0.979487 | 0.92735  | 0.720294 |
| 279 | 0.666667 | 0.984615 | 0.931624 | 0.736619 |
| 280 | 0.666667 | 0.984615 | 0.931624 | 0.736619 |
| 281 | 0.666667 | 0.984615 | 0.931624 | 0.736619 |
| 282 | 0.666667 | 0.984615 | 0.931624 | 0.736619 |
| 283 | 0.666667 | 0.984615 | 0.931624 | 0.736619 |
| 284 | 0.666667 | 0.984615 | 0.931624 | 0.736619 |
| 285 | 0.666667 | 0.979487 | 0.92735  | 0.720294 |
| 286 | 0.666667 | 0.979487 | 0.92735  | 0.720294 |
| 287 | 0.692308 | 0.979487 | 0.931624 | 0.738512 |
| 288 | 0.692308 | 0.979487 | 0.931624 | 0.738512 |
| 289 | 0.692308 | 0.979487 | 0.931624 | 0.738512 |
| 290 | 0.692308 | 0.979487 | 0.931624 | 0.738512 |
| 291 | 0.692308 | 0.979487 | 0.931624 | 0.738512 |
| 292 | 0.692308 | 0.984615 | 0.935897 | 0.754594 |
| 293 | 0.692308 | 0.984615 | 0.935897 | 0.754594 |
| 294 | 0.692308 | 0.984615 | 0.935897 | 0.754594 |
| 295 | 0.692308 | 0.984615 | 0.935897 | 0.754594 |
| 296 | 0.692308 | 0.984615 | 0.935897 | 0.754594 |
| 297 | 0.692308 | 0.979487 | 0.931624 | 0.738512 |
| 298 | 0.692308 | 0.979487 | 0.931624 | 0.738512 |
| 299 | 0.692308 | 0.979487 | 0.931624 | 0.738512 |
| 300 | 0.692308 | 0.979487 | 0.931624 | 0.738512 |
| 301 | 0.692308 | 0.979487 | 0.931624 | 0.738512 |
| 302 | 0.692308 | 0.979487 | 0.931624 | 0.738512 |
| 303 | 0.692308 | 0.979487 | 0.931624 | 0.738512 |

|     |          |          |          |          |
|-----|----------|----------|----------|----------|
| 304 | 0.692308 | 0.974359 | 0.92735  | 0.723116 |
| 305 | 0.692308 | 0.974359 | 0.92735  | 0.723116 |
| 306 | 0.692308 | 0.974359 | 0.92735  | 0.723116 |
| 307 | 0.692308 | 0.974359 | 0.92735  | 0.723116 |
| 308 | 0.692308 | 0.974359 | 0.92735  | 0.723116 |
| 309 | 0.692308 | 0.974359 | 0.92735  | 0.723116 |
| 310 | 0.692308 | 0.974359 | 0.92735  | 0.723116 |
| 311 | 0.692308 | 0.974359 | 0.92735  | 0.723116 |
| 312 | 0.692308 | 0.979487 | 0.931624 | 0.738512 |
| 313 | 0.692308 | 0.979487 | 0.931624 | 0.738512 |
| 314 | 0.692308 | 0.979487 | 0.931624 | 0.738512 |
| 315 | 0.692308 | 0.979487 | 0.931624 | 0.738512 |
| 316 | 0.692308 | 0.979487 | 0.931624 | 0.738512 |
| 317 | 0.692308 | 0.979487 | 0.931624 | 0.738512 |
| 318 | 0.666667 | 0.969231 | 0.918803 | 0.689741 |
| 319 | 0.692308 | 0.984615 | 0.935897 | 0.754594 |
| 320 | 0.692308 | 0.979487 | 0.931624 | 0.738512 |
| 321 | 0.692308 | 0.979487 | 0.931624 | 0.738512 |
| 322 | 0.692308 | 0.979487 | 0.931624 | 0.738512 |
| 323 | 0.692308 | 0.979487 | 0.931624 | 0.738512 |
| 324 | 0.692308 | 0.984615 | 0.935897 | 0.754594 |
| 325 | 0.692308 | 0.984615 | 0.935897 | 0.754594 |
| 326 | 0.692308 | 0.984615 | 0.935897 | 0.754594 |
| 327 | 0.692308 | 0.984615 | 0.935897 | 0.754594 |
| 328 | 0.692308 | 0.984615 | 0.935897 | 0.754594 |
| 329 | 0.692308 | 0.984615 | 0.935897 | 0.754594 |
| 330 | 0.692308 | 0.984615 | 0.935897 | 0.754594 |
| 331 | 0.692308 | 0.984615 | 0.935897 | 0.754594 |
| 332 | 0.692308 | 0.984615 | 0.935897 | 0.754594 |
| 333 | 0.692308 | 0.984615 | 0.935897 | 0.754594 |
| 334 | 0.692308 | 0.979487 | 0.931624 | 0.738512 |
| 335 | 0.692308 | 0.979487 | 0.931624 | 0.738512 |
| 336 | 0.692308 | 0.979487 | 0.931624 | 0.738512 |
| 337 | 0.692308 | 0.979487 | 0.931624 | 0.738512 |
| 338 | 0.692308 | 0.979487 | 0.931624 | 0.738512 |
| 339 | 0.692308 | 0.979487 | 0.931624 | 0.738512 |
| 340 | 0.692308 | 0.979487 | 0.931624 | 0.738512 |
| 341 | 0.692308 | 0.979487 | 0.931624 | 0.738512 |
| 342 | 0.692308 | 0.979487 | 0.931624 | 0.738512 |
| 343 | 0.692308 | 0.979487 | 0.931624 | 0.738512 |
| 344 | 0.692308 | 0.979487 | 0.931624 | 0.738512 |
| 345 | 0.692308 | 0.979487 | 0.931624 | 0.738512 |
| 346 | 0.692308 | 0.979487 | 0.931624 | 0.738512 |

|     |          |          |          |          |
|-----|----------|----------|----------|----------|
| 347 | 0.692308 | 0.979487 | 0.931624 | 0.738512 |
| 348 | 0.692308 | 0.979487 | 0.931624 | 0.738512 |
| 349 | 0.692308 | 0.979487 | 0.931624 | 0.738512 |
| 350 | 0.692308 | 0.979487 | 0.931624 | 0.738512 |
| 351 | 0.692308 | 0.979487 | 0.931624 | 0.738512 |
| 352 | 0.692308 | 0.979487 | 0.931624 | 0.738512 |
| 353 | 0.692308 | 0.979487 | 0.931624 | 0.738512 |
| 354 | 0.692308 | 0.979487 | 0.931624 | 0.738512 |
| 355 | 0.692308 | 0.979487 | 0.931624 | 0.738512 |
| 356 | 0.692308 | 0.979487 | 0.931624 | 0.738512 |
| 357 | 0.692308 | 0.979487 | 0.931624 | 0.738512 |
| 358 | 0.692308 | 0.979487 | 0.931624 | 0.738512 |
| 359 | 0.692308 | 0.984615 | 0.935897 | 0.754594 |
| 360 | 0.692308 | 0.984615 | 0.935897 | 0.754594 |
| 361 | 0.692308 | 0.984615 | 0.935897 | 0.754594 |
| 362 | 0.692308 | 0.984615 | 0.935897 | 0.754594 |
| 363 | 0.692308 | 0.984615 | 0.935897 | 0.754594 |
| 364 | 0.692308 | 0.989744 | 0.940171 | 0.77142  |
| 365 | 0.692308 | 0.989744 | 0.940171 | 0.77142  |
| 366 | 0.717949 | 0.989744 | 0.944444 | 0.788893 |
| 367 | 0.692308 | 0.989744 | 0.940171 | 0.77142  |
| 368 | 0.717949 | 0.989744 | 0.944444 | 0.788893 |
| 369 | 0.717949 | 0.989744 | 0.944444 | 0.788893 |
| 370 | 0.717949 | 0.989744 | 0.944444 | 0.788893 |
| 371 | 0.692308 | 0.989744 | 0.940171 | 0.77142  |
| 372 | 0.717949 | 0.989744 | 0.944444 | 0.788893 |
| 373 | 0.692308 | 0.989744 | 0.940171 | 0.77142  |
| 374 | 0.692308 | 0.989744 | 0.940171 | 0.77142  |
| 375 | 0.692308 | 0.984615 | 0.935897 | 0.754594 |
| 376 | 0.692308 | 0.984615 | 0.935897 | 0.754594 |
| 377 | 0.692308 | 0.984615 | 0.935897 | 0.754594 |
| 378 | 0.692308 | 0.984615 | 0.935897 | 0.754594 |
| 379 | 0.692308 | 0.984615 | 0.935897 | 0.754594 |
| 380 | 0.692308 | 0.984615 | 0.935897 | 0.754594 |
| 381 | 0.692308 | 0.984615 | 0.935897 | 0.754594 |
| 382 | 0.692308 | 0.979487 | 0.931624 | 0.738512 |
| 383 | 0.692308 | 0.979487 | 0.931624 | 0.738512 |
| 384 | 0.692308 | 0.979487 | 0.931624 | 0.738512 |
| 385 | 0.692308 | 0.984615 | 0.935897 | 0.754594 |
| 386 | 0.692308 | 0.984615 | 0.935897 | 0.754594 |
| 387 | 0.717949 | 0.989744 | 0.944444 | 0.788893 |
| 388 | 0.717949 | 0.989744 | 0.944444 | 0.788893 |
| 389 | 0.717949 | 0.989744 | 0.944444 | 0.788893 |

|     |          |          |          |          |
|-----|----------|----------|----------|----------|
| 390 | 0.717949 | 0.989744 | 0.944444 | 0.788893 |
| 391 | 0.717949 | 0.989744 | 0.944444 | 0.788893 |
| 392 | 0.692308 | 0.989744 | 0.940171 | 0.77142  |
| 393 | 0.717949 | 0.989744 | 0.944444 | 0.788893 |
| 394 | 0.717949 | 0.989744 | 0.944444 | 0.788893 |
| 395 | 0.717949 | 0.989744 | 0.944444 | 0.788893 |
| 396 | 0.717949 | 0.984615 | 0.940171 | 0.772337 |
| 397 | 0.717949 | 0.984615 | 0.940171 | 0.772337 |
| 398 | 0.717949 | 0.984615 | 0.940171 | 0.772337 |
| 399 | 0.717949 | 0.984615 | 0.940171 | 0.772337 |
| 400 | 0.692308 | 0.974359 | 0.92735  | 0.723116 |
| 401 | 0.692308 | 0.974359 | 0.92735  | 0.723116 |
| 402 | 0.692308 | 0.974359 | 0.92735  | 0.723116 |
| 403 | 0.717949 | 0.974359 | 0.931624 | 0.7413   |
| 404 | 0.717949 | 0.974359 | 0.931624 | 0.7413   |
| 405 | 0.717949 | 0.974359 | 0.931624 | 0.7413   |
| 406 | 0.717949 | 0.974359 | 0.931624 | 0.7413   |
| 407 | 0.717949 | 0.974359 | 0.931624 | 0.7413   |
| 408 | 0.717949 | 0.974359 | 0.931624 | 0.7413   |
| 409 | 0.717949 | 0.974359 | 0.931624 | 0.7413   |
| 410 | 0.717949 | 0.974359 | 0.931624 | 0.7413   |
| 411 | 0.717949 | 0.974359 | 0.931624 | 0.7413   |
| 412 | 0.692308 | 0.974359 | 0.92735  | 0.723116 |
| 413 | 0.692308 | 0.974359 | 0.92735  | 0.723116 |
| 414 | 0.717949 | 0.974359 | 0.931624 | 0.7413   |
| 415 | 0.717949 | 0.974359 | 0.931624 | 0.7413   |
| 416 | 0.717949 | 0.974359 | 0.931624 | 0.7413   |
| 417 | 0.717949 | 0.974359 | 0.931624 | 0.7413   |
| 418 | 0.717949 | 0.974359 | 0.931624 | 0.7413   |
| 419 | 0.717949 | 0.974359 | 0.931624 | 0.7413   |
| 420 | 0.692308 | 0.974359 | 0.92735  | 0.723116 |
| 421 | 0.692308 | 0.974359 | 0.92735  | 0.723116 |
| 422 | 0.692308 | 0.974359 | 0.92735  | 0.723116 |
| 423 | 0.692308 | 0.974359 | 0.92735  | 0.723116 |
| 424 | 0.717949 | 0.974359 | 0.931624 | 0.7413   |
| 425 | 0.717949 | 0.974359 | 0.931624 | 0.7413   |
| 426 | 0.717949 | 0.969231 | 0.92735  | 0.726717 |
| 427 | 0.717949 | 0.969231 | 0.92735  | 0.726717 |
| 428 | 0.717949 | 0.969231 | 0.92735  | 0.726717 |
| 429 | 0.717949 | 0.969231 | 0.92735  | 0.726717 |
| 430 | 0.717949 | 0.969231 | 0.92735  | 0.726717 |
| 431 | 0.717949 | 0.969231 | 0.92735  | 0.726717 |
| 432 | 0.717949 | 0.969231 | 0.92735  | 0.726717 |



|     |          |          |          |          |
|-----|----------|----------|----------|----------|
| 433 | 0.717949 | 0.969231 | 0.92735  | 0.726717 |
| 434 | 0.717949 | 0.969231 | 0.92735  | 0.726717 |
| 435 | 0.717949 | 0.969231 | 0.92735  | 0.726717 |
| 436 | 0.717949 | 0.969231 | 0.92735  | 0.726717 |
| 437 | 0.717949 | 0.969231 | 0.92735  | 0.726717 |
| 438 | 0.717949 | 0.969231 | 0.92735  | 0.726717 |
| 439 | 0.717949 | 0.969231 | 0.92735  | 0.726717 |
| 440 | 0.717949 | 0.969231 | 0.92735  | 0.726717 |
| 441 | 0.717949 | 0.969231 | 0.92735  | 0.726717 |
| 442 | 0.717949 | 0.969231 | 0.92735  | 0.726717 |
| 443 | 0.717949 | 0.969231 | 0.92735  | 0.726717 |
| 444 | 0.717949 | 0.974359 | 0.931624 | 0.7413   |
| 445 | 0.717949 | 0.974359 | 0.931624 | 0.7413   |
| 446 | 0.717949 | 0.969231 | 0.92735  | 0.726717 |
| 447 | 0.717949 | 0.969231 | 0.92735  | 0.726717 |
| 448 | 0.717949 | 0.969231 | 0.92735  | 0.726717 |
| 449 | 0.717949 | 0.974359 | 0.931624 | 0.7413   |
| 450 | 0.717949 | 0.974359 | 0.931624 | 0.7413   |
| 451 | 0.717949 | 0.969231 | 0.92735  | 0.726717 |
| 452 | 0.717949 | 0.969231 | 0.92735  | 0.726717 |
| 453 | 0.717949 | 0.969231 | 0.92735  | 0.726717 |
| 454 | 0.717949 | 0.969231 | 0.92735  | 0.726717 |
| 455 | 0.717949 | 0.969231 | 0.92735  | 0.726717 |
| 456 | 0.717949 | 0.969231 | 0.92735  | 0.726717 |
| 457 | 0.717949 | 0.969231 | 0.92735  | 0.726717 |
| 458 | 0.717949 | 0.969231 | 0.92735  | 0.726717 |
| 459 | 0.717949 | 0.969231 | 0.92735  | 0.726717 |
| 460 | 0.74359  | 0.974359 | 0.935897 | 0.759257 |
| 461 | 0.74359  | 0.974359 | 0.935897 | 0.759257 |
| 462 | 0.74359  | 0.974359 | 0.935897 | 0.759257 |
| 463 | 0.74359  | 0.979487 | 0.940171 | 0.774246 |
| 464 | 0.74359  | 0.979487 | 0.940171 | 0.774246 |
| 465 | 0.74359  | 0.979487 | 0.940171 | 0.774246 |
| 466 | 0.74359  | 0.979487 | 0.940171 | 0.774246 |
| 467 | 0.74359  | 0.979487 | 0.940171 | 0.774246 |
| 468 | 0.74359  | 0.979487 | 0.940171 | 0.774246 |
| 469 | 0.74359  | 0.979487 | 0.940171 | 0.774246 |
| 470 | 0.74359  | 0.974359 | 0.935897 | 0.759257 |
| 471 | 0.74359  | 0.979487 | 0.940171 | 0.774246 |
| 472 | 0.74359  | 0.979487 | 0.940171 | 0.774246 |
| 473 | 0.74359  | 0.974359 | 0.935897 | 0.759257 |
| 474 | 0.74359  | 0.974359 | 0.935897 | 0.759257 |
| 475 | 0.74359  | 0.974359 | 0.935897 | 0.759257 |

|     |         |          |          |          |
|-----|---------|----------|----------|----------|
| 476 | 0.74359 | 0.974359 | 0.935897 | 0.759257 |
| 477 | 0.74359 | 0.974359 | 0.935897 | 0.759257 |
| 478 | 0.74359 | 0.974359 | 0.935897 | 0.759257 |
| 479 | 0.74359 | 0.974359 | 0.935897 | 0.759257 |
| 480 | 0.74359 | 0.974359 | 0.935897 | 0.759257 |
| 481 | 0.74359 | 0.974359 | 0.935897 | 0.759257 |
| 482 | 0.74359 | 0.974359 | 0.935897 | 0.759257 |
| 483 | 0.74359 | 0.974359 | 0.935897 | 0.759257 |
| 484 | 0.74359 | 0.974359 | 0.935897 | 0.759257 |
| 485 | 0.74359 | 0.974359 | 0.935897 | 0.759257 |
| 486 | 0.74359 | 0.974359 | 0.935897 | 0.759257 |
| 487 | 0.74359 | 0.974359 | 0.935897 | 0.759257 |
| 488 | 0.74359 | 0.974359 | 0.935897 | 0.759257 |
| 489 | 0.74359 | 0.974359 | 0.935897 | 0.759257 |
| 490 | 0.74359 | 0.974359 | 0.935897 | 0.759257 |
| 491 | 0.74359 | 0.974359 | 0.935897 | 0.759257 |
| 492 | 0.74359 | 0.974359 | 0.935897 | 0.759257 |
| 493 | 0.74359 | 0.974359 | 0.935897 | 0.759257 |
| 494 | 0.74359 | 0.974359 | 0.935897 | 0.759257 |
| 495 | 0.74359 | 0.974359 | 0.935897 | 0.759257 |
| 496 | 0.74359 | 0.979487 | 0.940171 | 0.774246 |
| 497 | 0.74359 | 0.974359 | 0.935897 | 0.759257 |
| 498 | 0.74359 | 0.974359 | 0.935897 | 0.759257 |
| 499 | 0.74359 | 0.974359 | 0.935897 | 0.759257 |
| 500 | 0.74359 | 0.974359 | 0.935897 | 0.759257 |

(8) Dataset  $D_8$

| Number of features | SN       | SP       | ACC      | MCC      |
|--------------------|----------|----------|----------|----------|
| 4                  | 0.333333 | 0.974359 | 0.867521 | 0.430331 |
| 5                  | 0.435897 | 0.974359 | 0.884615 | 0.523873 |
| 6                  | 0.487179 | 0.969231 | 0.888889 | 0.550633 |
| 7                  | 0.512821 | 0.964103 | 0.888889 | 0.556328 |
| 8                  | 0.512821 | 0.964103 | 0.888889 | 0.556328 |
| 9                  | 0.487179 | 0.969231 | 0.888889 | 0.550633 |
| 10                 | 0.538462 | 0.974359 | 0.901709 | 0.60813  |
| 11                 | 0.615385 | 0.979487 | 0.918803 | 0.683062 |
| 12                 | 0.615385 | 0.979487 | 0.918803 | 0.683062 |
| 13                 | 0.589744 | 0.979487 | 0.91453  | 0.664004 |
| 14                 | 0.589744 | 0.979487 | 0.91453  | 0.664004 |
| 15                 | 0.589744 | 0.979487 | 0.91453  | 0.664004 |
| 16                 | 0.589744 | 0.979487 | 0.91453  | 0.664004 |
| 17                 | 0.589744 | 0.979487 | 0.91453  | 0.664004 |

|    |          |          |          |          |
|----|----------|----------|----------|----------|
| 18 | 0.589744 | 0.979487 | 0.91453  | 0.664004 |
| 19 | 0.589744 | 0.974359 | 0.910256 | 0.647732 |
| 20 | 0.589744 | 0.969231 | 0.905983 | 0.632216 |
| 21 | 0.589744 | 0.969231 | 0.905983 | 0.632216 |
| 22 | 0.564103 | 0.969231 | 0.901709 | 0.612401 |
| 23 | 0.564103 | 0.969231 | 0.901709 | 0.612401 |
| 24 | 0.564103 | 0.974359 | 0.905983 | 0.628112 |
| 25 | 0.538462 | 0.974359 | 0.901709 | 0.60813  |
| 26 | 0.538462 | 0.969231 | 0.897436 | 0.59222  |
| 27 | 0.538462 | 0.969231 | 0.897436 | 0.59222  |
| 28 | 0.564103 | 0.969231 | 0.901709 | 0.612401 |
| 29 | 0.538462 | 0.969231 | 0.897436 | 0.59222  |
| 30 | 0.564103 | 0.969231 | 0.901709 | 0.612401 |
| 31 | 0.564103 | 0.969231 | 0.901709 | 0.612401 |
| 32 | 0.538462 | 0.964103 | 0.893162 | 0.57707  |
| 33 | 0.538462 | 0.964103 | 0.893162 | 0.57707  |
| 34 | 0.538462 | 0.964103 | 0.893162 | 0.57707  |
| 35 | 0.564103 | 0.964103 | 0.897436 | 0.597415 |
| 36 | 0.589744 | 0.964103 | 0.901709 | 0.617395 |
| 37 | 0.589744 | 0.964103 | 0.901709 | 0.617395 |
| 38 | 0.564103 | 0.964103 | 0.897436 | 0.597415 |
| 39 | 0.589744 | 0.964103 | 0.901709 | 0.617395 |
| 40 | 0.589744 | 0.964103 | 0.901709 | 0.617395 |
| 41 | 0.564103 | 0.964103 | 0.897436 | 0.597415 |
| 42 | 0.589744 | 0.969231 | 0.905983 | 0.632216 |
| 43 | 0.589744 | 0.969231 | 0.905983 | 0.632216 |
| 44 | 0.615385 | 0.974359 | 0.91453  | 0.667017 |
| 45 | 0.615385 | 0.974359 | 0.91453  | 0.667017 |
| 46 | 0.615385 | 0.974359 | 0.91453  | 0.667017 |
| 47 | 0.615385 | 0.974359 | 0.91453  | 0.667017 |
| 48 | 0.615385 | 0.969231 | 0.910256 | 0.651695 |
| 49 | 0.615385 | 0.969231 | 0.910256 | 0.651695 |
| 50 | 0.615385 | 0.974359 | 0.91453  | 0.667017 |
| 51 | 0.589744 | 0.974359 | 0.910256 | 0.647732 |
| 52 | 0.589744 | 0.974359 | 0.910256 | 0.647732 |
| 53 | 0.589744 | 0.974359 | 0.910256 | 0.647732 |
| 54 | 0.589744 | 0.974359 | 0.910256 | 0.647732 |
| 55 | 0.589744 | 0.974359 | 0.910256 | 0.647732 |
| 56 | 0.589744 | 0.974359 | 0.910256 | 0.647732 |
| 57 | 0.589744 | 0.974359 | 0.910256 | 0.647732 |
| 58 | 0.589744 | 0.974359 | 0.910256 | 0.647732 |
| 59 | 0.589744 | 0.969231 | 0.905983 | 0.632216 |
| 60 | 0.589744 | 0.974359 | 0.910256 | 0.647732 |

|     |          |          |          |          |
|-----|----------|----------|----------|----------|
| 61  | 0.589744 | 0.969231 | 0.905983 | 0.632216 |
| 62  | 0.589744 | 0.979487 | 0.91453  | 0.664004 |
| 63  | 0.589744 | 0.974359 | 0.910256 | 0.647732 |
| 64  | 0.589744 | 0.974359 | 0.910256 | 0.647732 |
| 65  | 0.564103 | 0.979487 | 0.910256 | 0.644618 |
| 66  | 0.564103 | 0.979487 | 0.910256 | 0.644618 |
| 67  | 0.564103 | 0.979487 | 0.910256 | 0.644618 |
| 68  | 0.564103 | 0.979487 | 0.910256 | 0.644618 |
| 69  | 0.564103 | 0.974359 | 0.905983 | 0.628112 |
| 70  | 0.564103 | 0.974359 | 0.905983 | 0.628112 |
| 71  | 0.589744 | 0.984615 | 0.918803 | 0.681106 |
| 72  | 0.589744 | 0.984615 | 0.918803 | 0.681106 |
| 73  | 0.615385 | 0.984615 | 0.923077 | 0.699896 |
| 74  | 0.641026 | 0.984615 | 0.92735  | 0.718393 |
| 75  | 0.615385 | 0.984615 | 0.923077 | 0.699896 |
| 76  | 0.615385 | 0.984615 | 0.923077 | 0.699896 |
| 77  | 0.615385 | 0.984615 | 0.923077 | 0.699896 |
| 78  | 0.615385 | 0.984615 | 0.923077 | 0.699896 |
| 79  | 0.641026 | 0.984615 | 0.92735  | 0.718393 |
| 80  | 0.615385 | 0.984615 | 0.923077 | 0.699896 |
| 81  | 0.666667 | 0.979487 | 0.92735  | 0.720294 |
| 82  | 0.641026 | 0.979487 | 0.923077 | 0.701818 |
| 83  | 0.641026 | 0.979487 | 0.923077 | 0.701818 |
| 84  | 0.641026 | 0.974359 | 0.918803 | 0.685994 |
| 85  | 0.641026 | 0.974359 | 0.918803 | 0.685994 |
| 86  | 0.641026 | 0.974359 | 0.918803 | 0.685994 |
| 87  | 0.641026 | 0.979487 | 0.923077 | 0.701818 |
| 88  | 0.692308 | 0.979487 | 0.931624 | 0.738512 |
| 89  | 0.692308 | 0.979487 | 0.931624 | 0.738512 |
| 90  | 0.692308 | 0.979487 | 0.931624 | 0.738512 |
| 91  | 0.692308 | 0.979487 | 0.931624 | 0.738512 |
| 92  | 0.666667 | 0.979487 | 0.92735  | 0.720294 |
| 93  | 0.666667 | 0.974359 | 0.923077 | 0.704687 |
| 94  | 0.641026 | 0.979487 | 0.923077 | 0.701818 |
| 95  | 0.641026 | 0.979487 | 0.923077 | 0.701818 |
| 96  | 0.641026 | 0.979487 | 0.923077 | 0.701818 |
| 97  | 0.641026 | 0.979487 | 0.923077 | 0.701818 |
| 98  | 0.641026 | 0.979487 | 0.923077 | 0.701818 |
| 99  | 0.641026 | 0.979487 | 0.923077 | 0.701818 |
| 100 | 0.641026 | 0.979487 | 0.923077 | 0.701818 |
| 101 | 0.641026 | 0.979487 | 0.923077 | 0.701818 |
| 102 | 0.666667 | 0.989744 | 0.935897 | 0.753724 |
| 103 | 0.666667 | 0.989744 | 0.935897 | 0.753724 |

|     |          |          |          |          |
|-----|----------|----------|----------|----------|
| 104 | 0.666667 | 0.994872 | 0.940171 | 0.771681 |
| 105 | 0.666667 | 0.994872 | 0.940171 | 0.771681 |
| 106 | 0.692308 | 0.994872 | 0.944444 | 0.789055 |
| 107 | 0.666667 | 0.989744 | 0.935897 | 0.753724 |
| 108 | 0.692308 | 0.984615 | 0.935897 | 0.754594 |
| 109 | 0.692308 | 0.984615 | 0.935897 | 0.754594 |
| 110 | 0.692308 | 0.979487 | 0.931624 | 0.738512 |
| 111 | 0.692308 | 0.974359 | 0.92735  | 0.723116 |
| 112 | 0.692308 | 0.979487 | 0.931624 | 0.738512 |
| 113 | 0.692308 | 0.984615 | 0.935897 | 0.754594 |
| 114 | 0.692308 | 0.979487 | 0.931624 | 0.738512 |
| 115 | 0.666667 | 0.979487 | 0.92735  | 0.720294 |
| 116 | 0.666667 | 0.979487 | 0.92735  | 0.720294 |
| 117 | 0.641026 | 0.979487 | 0.923077 | 0.701818 |
| 118 | 0.641026 | 0.979487 | 0.923077 | 0.701818 |
| 119 | 0.641026 | 0.979487 | 0.923077 | 0.701818 |
| 120 | 0.641026 | 0.979487 | 0.923077 | 0.701818 |
| 121 | 0.615385 | 0.974359 | 0.91453  | 0.667017 |
| 122 | 0.615385 | 0.969231 | 0.910256 | 0.651695 |
| 123 | 0.641026 | 0.964103 | 0.910256 | 0.656366 |
| 124 | 0.641026 | 0.964103 | 0.910256 | 0.656366 |
| 125 | 0.641026 | 0.964103 | 0.910256 | 0.656366 |
| 126 | 0.641026 | 0.964103 | 0.910256 | 0.656366 |
| 127 | 0.641026 | 0.969231 | 0.91453  | 0.670862 |
| 128 | 0.641026 | 0.969231 | 0.91453  | 0.670862 |
| 129 | 0.666667 | 0.969231 | 0.918803 | 0.689741 |
| 130 | 0.666667 | 0.969231 | 0.918803 | 0.689741 |
| 131 | 0.615385 | 0.969231 | 0.910256 | 0.651695 |
| 132 | 0.641026 | 0.969231 | 0.91453  | 0.670862 |
| 133 | 0.615385 | 0.964103 | 0.905983 | 0.637037 |
| 134 | 0.641026 | 0.964103 | 0.910256 | 0.656366 |
| 135 | 0.641026 | 0.964103 | 0.910256 | 0.656366 |
| 136 | 0.666667 | 0.979487 | 0.92735  | 0.720294 |
| 137 | 0.666667 | 0.979487 | 0.92735  | 0.720294 |
| 138 | 0.666667 | 0.974359 | 0.923077 | 0.704687 |
| 139 | 0.666667 | 0.969231 | 0.918803 | 0.689741 |
| 140 | 0.641026 | 0.964103 | 0.910256 | 0.656366 |
| 141 | 0.641026 | 0.964103 | 0.910256 | 0.656366 |
| 142 | 0.641026 | 0.964103 | 0.910256 | 0.656366 |
| 143 | 0.641026 | 0.964103 | 0.910256 | 0.656366 |
| 144 | 0.641026 | 0.964103 | 0.910256 | 0.656366 |
| 145 | 0.641026 | 0.964103 | 0.910256 | 0.656366 |
| 146 | 0.641026 | 0.974359 | 0.918803 | 0.685994 |

|     |          |          |          |          |
|-----|----------|----------|----------|----------|
| 147 | 0.641026 | 0.969231 | 0.91453  | 0.670862 |
| 148 | 0.641026 | 0.964103 | 0.910256 | 0.656366 |
| 149 | 0.641026 | 0.969231 | 0.91453  | 0.670862 |
| 150 | 0.641026 | 0.964103 | 0.910256 | 0.656366 |
| 151 | 0.641026 | 0.964103 | 0.910256 | 0.656366 |
| 152 | 0.641026 | 0.964103 | 0.910256 | 0.656366 |
| 153 | 0.641026 | 0.964103 | 0.910256 | 0.656366 |
| 154 | 0.641026 | 0.964103 | 0.910256 | 0.656366 |
| 155 | 0.615385 | 0.984615 | 0.923077 | 0.699896 |
| 156 | 0.615385 | 0.979487 | 0.918803 | 0.683062 |
| 157 | 0.615385 | 0.984615 | 0.923077 | 0.699896 |
| 158 | 0.615385 | 0.984615 | 0.923077 | 0.699896 |
| 159 | 0.615385 | 0.984615 | 0.923077 | 0.699896 |
| 160 | 0.641026 | 0.984615 | 0.92735  | 0.718393 |
| 161 | 0.615385 | 0.984615 | 0.923077 | 0.699896 |
| 162 | 0.615385 | 0.984615 | 0.923077 | 0.699896 |
| 163 | 0.641026 | 0.979487 | 0.923077 | 0.701818 |
| 164 | 0.641026 | 0.979487 | 0.923077 | 0.701818 |
| 165 | 0.641026 | 0.979487 | 0.923077 | 0.701818 |
| 166 | 0.641026 | 0.974359 | 0.918803 | 0.685994 |
| 167 | 0.641026 | 0.979487 | 0.923077 | 0.701818 |
| 168 | 0.641026 | 0.979487 | 0.923077 | 0.701818 |
| 169 | 0.641026 | 0.979487 | 0.923077 | 0.701818 |
| 170 | 0.692308 | 0.979487 | 0.931624 | 0.738512 |
| 171 | 0.692308 | 0.979487 | 0.931624 | 0.738512 |
| 172 | 0.692308 | 0.979487 | 0.931624 | 0.738512 |
| 173 | 0.692308 | 0.974359 | 0.92735  | 0.723116 |
| 174 | 0.692308 | 0.974359 | 0.92735  | 0.723116 |
| 175 | 0.692308 | 0.974359 | 0.92735  | 0.723116 |
| 176 | 0.692308 | 0.979487 | 0.931624 | 0.738512 |
| 177 | 0.692308 | 0.979487 | 0.931624 | 0.738512 |
| 178 | 0.692308 | 0.969231 | 0.923077 | 0.708353 |
| 179 | 0.692308 | 0.979487 | 0.931624 | 0.738512 |
| 180 | 0.692308 | 0.979487 | 0.931624 | 0.738512 |
| 181 | 0.692308 | 0.979487 | 0.931624 | 0.738512 |
| 182 | 0.641026 | 0.979487 | 0.923077 | 0.701818 |
| 183 | 0.641026 | 0.979487 | 0.923077 | 0.701818 |
| 184 | 0.641026 | 0.984615 | 0.92735  | 0.718393 |
| 185 | 0.641026 | 0.979487 | 0.923077 | 0.701818 |
| 186 | 0.641026 | 0.979487 | 0.923077 | 0.701818 |
| 187 | 0.641026 | 0.974359 | 0.918803 | 0.685994 |
| 188 | 0.641026 | 0.979487 | 0.923077 | 0.701818 |
| 189 | 0.641026 | 0.974359 | 0.918803 | 0.685994 |

|     |          |          |          |          |
|-----|----------|----------|----------|----------|
| 190 | 0.641026 | 0.974359 | 0.918803 | 0.685994 |
| 191 | 0.641026 | 0.974359 | 0.918803 | 0.685994 |
| 192 | 0.641026 | 0.974359 | 0.918803 | 0.685994 |
| 193 | 0.641026 | 0.974359 | 0.918803 | 0.685994 |
| 194 | 0.641026 | 0.974359 | 0.918803 | 0.685994 |
| 195 | 0.641026 | 0.974359 | 0.918803 | 0.685994 |
| 196 | 0.641026 | 0.974359 | 0.918803 | 0.685994 |
| 197 | 0.641026 | 0.974359 | 0.918803 | 0.685994 |
| 198 | 0.641026 | 0.974359 | 0.918803 | 0.685994 |
| 199 | 0.641026 | 0.974359 | 0.918803 | 0.685994 |
| 200 | 0.641026 | 0.974359 | 0.918803 | 0.685994 |
| 201 | 0.641026 | 0.974359 | 0.918803 | 0.685994 |
| 202 | 0.641026 | 0.969231 | 0.91453  | 0.670862 |
| 203 | 0.641026 | 0.969231 | 0.91453  | 0.670862 |
| 204 | 0.641026 | 0.969231 | 0.91453  | 0.670862 |
| 205 | 0.641026 | 0.969231 | 0.91453  | 0.670862 |
| 206 | 0.641026 | 0.969231 | 0.91453  | 0.670862 |
| 207 | 0.641026 | 0.969231 | 0.91453  | 0.670862 |
| 208 | 0.666667 | 0.969231 | 0.918803 | 0.689741 |
| 209 | 0.666667 | 0.969231 | 0.918803 | 0.689741 |
| 210 | 0.666667 | 0.969231 | 0.918803 | 0.689741 |
| 211 | 0.666667 | 0.969231 | 0.918803 | 0.689741 |
| 212 | 0.666667 | 0.969231 | 0.918803 | 0.689741 |
| 213 | 0.666667 | 0.969231 | 0.918803 | 0.689741 |
| 214 | 0.666667 | 0.969231 | 0.918803 | 0.689741 |
| 215 | 0.666667 | 0.969231 | 0.918803 | 0.689741 |
| 216 | 0.666667 | 0.969231 | 0.918803 | 0.689741 |
| 217 | 0.666667 | 0.969231 | 0.918803 | 0.689741 |
| 218 | 0.666667 | 0.969231 | 0.918803 | 0.689741 |
| 219 | 0.666667 | 0.969231 | 0.918803 | 0.689741 |
| 220 | 0.666667 | 0.969231 | 0.918803 | 0.689741 |
| 221 | 0.666667 | 0.969231 | 0.918803 | 0.689741 |
| 222 | 0.666667 | 0.969231 | 0.918803 | 0.689741 |
| 223 | 0.666667 | 0.969231 | 0.918803 | 0.689741 |
| 224 | 0.666667 | 0.969231 | 0.918803 | 0.689741 |
| 225 | 0.666667 | 0.969231 | 0.918803 | 0.689741 |
| 226 | 0.666667 | 0.969231 | 0.918803 | 0.689741 |
| 227 | 0.641026 | 0.969231 | 0.91453  | 0.670862 |
| 228 | 0.641026 | 0.969231 | 0.91453  | 0.670862 |
| 229 | 0.641026 | 0.969231 | 0.91453  | 0.670862 |
| 230 | 0.641026 | 0.969231 | 0.91453  | 0.670862 |
| 231 | 0.641026 | 0.969231 | 0.91453  | 0.670862 |
| 232 | 0.641026 | 0.969231 | 0.91453  | 0.670862 |

|     |          |          |          |          |
|-----|----------|----------|----------|----------|
| 233 | 0.641026 | 0.969231 | 0.91453  | 0.670862 |
| 234 | 0.641026 | 0.969231 | 0.91453  | 0.670862 |
| 235 | 0.641026 | 0.969231 | 0.91453  | 0.670862 |
| 236 | 0.641026 | 0.969231 | 0.91453  | 0.670862 |
| 237 | 0.641026 | 0.969231 | 0.91453  | 0.670862 |
| 238 | 0.641026 | 0.969231 | 0.91453  | 0.670862 |
| 239 | 0.641026 | 0.969231 | 0.91453  | 0.670862 |
| 240 | 0.641026 | 0.969231 | 0.91453  | 0.670862 |
| 241 | 0.641026 | 0.969231 | 0.91453  | 0.670862 |
| 242 | 0.641026 | 0.969231 | 0.91453  | 0.670862 |
| 243 | 0.641026 | 0.969231 | 0.91453  | 0.670862 |
| 244 | 0.641026 | 0.969231 | 0.91453  | 0.670862 |
| 245 | 0.641026 | 0.969231 | 0.91453  | 0.670862 |
| 246 | 0.641026 | 0.969231 | 0.91453  | 0.670862 |
| 247 | 0.641026 | 0.964103 | 0.910256 | 0.656366 |
| 248 | 0.641026 | 0.964103 | 0.910256 | 0.656366 |
| 249 | 0.641026 | 0.964103 | 0.910256 | 0.656366 |
| 250 | 0.641026 | 0.964103 | 0.910256 | 0.656366 |
| 251 | 0.692308 | 0.969231 | 0.923077 | 0.708353 |
| 252 | 0.692308 | 0.969231 | 0.923077 | 0.708353 |
| 253 | 0.692308 | 0.969231 | 0.923077 | 0.708353 |
| 254 | 0.692308 | 0.974359 | 0.92735  | 0.723116 |
| 255 | 0.692308 | 0.974359 | 0.92735  | 0.723116 |
| 256 | 0.692308 | 0.974359 | 0.92735  | 0.723116 |
| 257 | 0.692308 | 0.974359 | 0.92735  | 0.723116 |
| 258 | 0.692308 | 0.974359 | 0.92735  | 0.723116 |
| 259 | 0.692308 | 0.974359 | 0.92735  | 0.723116 |
| 260 | 0.692308 | 0.974359 | 0.92735  | 0.723116 |
| 261 | 0.692308 | 0.974359 | 0.92735  | 0.723116 |
| 262 | 0.692308 | 0.974359 | 0.92735  | 0.723116 |
| 263 | 0.692308 | 0.974359 | 0.92735  | 0.723116 |
| 264 | 0.692308 | 0.974359 | 0.92735  | 0.723116 |
| 265 | 0.692308 | 0.974359 | 0.92735  | 0.723116 |
| 266 | 0.692308 | 0.974359 | 0.92735  | 0.723116 |
| 267 | 0.692308 | 0.974359 | 0.92735  | 0.723116 |
| 268 | 0.692308 | 0.974359 | 0.92735  | 0.723116 |
| 269 | 0.692308 | 0.979487 | 0.931624 | 0.738512 |
| 270 | 0.692308 | 0.974359 | 0.92735  | 0.723116 |
| 271 | 0.692308 | 0.974359 | 0.92735  | 0.723116 |
| 272 | 0.692308 | 0.974359 | 0.92735  | 0.723116 |
| 273 | 0.692308 | 0.974359 | 0.92735  | 0.723116 |
| 274 | 0.692308 | 0.974359 | 0.92735  | 0.723116 |
| 275 | 0.692308 | 0.974359 | 0.92735  | 0.723116 |



|     |          |          |          |          |
|-----|----------|----------|----------|----------|
| 276 | 0.692308 | 0.974359 | 0.92735  | 0.723116 |
| 277 | 0.666667 | 0.974359 | 0.923077 | 0.704687 |
| 278 | 0.666667 | 0.974359 | 0.923077 | 0.704687 |
| 279 | 0.666667 | 0.974359 | 0.923077 | 0.704687 |
| 280 | 0.666667 | 0.974359 | 0.923077 | 0.704687 |
| 281 | 0.666667 | 0.974359 | 0.923077 | 0.704687 |
| 282 | 0.666667 | 0.974359 | 0.923077 | 0.704687 |
| 283 | 0.666667 | 0.974359 | 0.923077 | 0.704687 |
| 284 | 0.666667 | 0.974359 | 0.923077 | 0.704687 |
| 285 | 0.666667 | 0.974359 | 0.923077 | 0.704687 |
| 286 | 0.666667 | 0.974359 | 0.923077 | 0.704687 |
| 287 | 0.666667 | 0.974359 | 0.923077 | 0.704687 |
| 288 | 0.692308 | 0.979487 | 0.931624 | 0.738512 |
| 289 | 0.692308 | 0.979487 | 0.931624 | 0.738512 |
| 290 | 0.692308 | 0.979487 | 0.931624 | 0.738512 |
| 291 | 0.692308 | 0.979487 | 0.931624 | 0.738512 |
| 292 | 0.692308 | 0.979487 | 0.931624 | 0.738512 |
| 293 | 0.692308 | 0.979487 | 0.931624 | 0.738512 |
| 294 | 0.666667 | 0.979487 | 0.92735  | 0.720294 |
| 295 | 0.666667 | 0.979487 | 0.92735  | 0.720294 |
| 296 | 0.666667 | 0.979487 | 0.92735  | 0.720294 |
| 297 | 0.666667 | 0.979487 | 0.92735  | 0.720294 |
| 298 | 0.666667 | 0.979487 | 0.92735  | 0.720294 |
| 299 | 0.666667 | 0.979487 | 0.92735  | 0.720294 |
| 300 | 0.692308 | 0.979487 | 0.931624 | 0.738512 |
| 301 | 0.692308 | 0.979487 | 0.931624 | 0.738512 |
| 302 | 0.692308 | 0.979487 | 0.931624 | 0.738512 |
| 303 | 0.666667 | 0.979487 | 0.92735  | 0.720294 |
| 304 | 0.717949 | 0.974359 | 0.931624 | 0.7413   |
| 305 | 0.717949 | 0.974359 | 0.931624 | 0.7413   |
| 306 | 0.717949 | 0.974359 | 0.931624 | 0.7413   |
| 307 | 0.717949 | 0.974359 | 0.931624 | 0.7413   |
| 308 | 0.717949 | 0.974359 | 0.931624 | 0.7413   |
| 309 | 0.717949 | 0.974359 | 0.931624 | 0.7413   |
| 310 | 0.717949 | 0.974359 | 0.931624 | 0.7413   |
| 311 | 0.717949 | 0.974359 | 0.931624 | 0.7413   |
| 312 | 0.717949 | 0.974359 | 0.931624 | 0.7413   |
| 313 | 0.717949 | 0.974359 | 0.931624 | 0.7413   |
| 314 | 0.717949 | 0.974359 | 0.931624 | 0.7413   |
| 315 | 0.717949 | 0.974359 | 0.931624 | 0.7413   |
| 316 | 0.717949 | 0.979487 | 0.935897 | 0.75649  |
| 317 | 0.717949 | 0.979487 | 0.935897 | 0.75649  |
| 318 | 0.717949 | 0.979487 | 0.935897 | 0.75649  |

|     |          |          |          |          |
|-----|----------|----------|----------|----------|
| 319 | 0.717949 | 0.974359 | 0.931624 | 0.7413   |
| 320 | 0.717949 | 0.974359 | 0.931624 | 0.7413   |
| 321 | 0.717949 | 0.974359 | 0.931624 | 0.7413   |
| 322 | 0.717949 | 0.974359 | 0.931624 | 0.7413   |
| 323 | 0.717949 | 0.974359 | 0.931624 | 0.7413   |
| 324 | 0.717949 | 0.974359 | 0.931624 | 0.7413   |
| 325 | 0.717949 | 0.974359 | 0.931624 | 0.7413   |
| 326 | 0.717949 | 0.974359 | 0.931624 | 0.7413   |
| 327 | 0.717949 | 0.974359 | 0.931624 | 0.7413   |
| 328 | 0.717949 | 0.974359 | 0.931624 | 0.7413   |
| 329 | 0.717949 | 0.969231 | 0.92735  | 0.726717 |
| 330 | 0.717949 | 0.969231 | 0.92735  | 0.726717 |
| 331 | 0.717949 | 0.974359 | 0.931624 | 0.7413   |
| 332 | 0.717949 | 0.974359 | 0.931624 | 0.7413   |
| 333 | 0.717949 | 0.974359 | 0.931624 | 0.7413   |
| 334 | 0.717949 | 0.974359 | 0.931624 | 0.7413   |
| 335 | 0.717949 | 0.969231 | 0.92735  | 0.726717 |
| 336 | 0.717949 | 0.974359 | 0.931624 | 0.7413   |
| 337 | 0.717949 | 0.974359 | 0.931624 | 0.7413   |
| 338 | 0.717949 | 0.974359 | 0.931624 | 0.7413   |
| 339 | 0.717949 | 0.974359 | 0.931624 | 0.7413   |
| 340 | 0.717949 | 0.974359 | 0.931624 | 0.7413   |
| 341 | 0.717949 | 0.974359 | 0.931624 | 0.7413   |
| 342 | 0.717949 | 0.974359 | 0.931624 | 0.7413   |
| 343 | 0.717949 | 0.974359 | 0.931624 | 0.7413   |
| 344 | 0.717949 | 0.974359 | 0.931624 | 0.7413   |
| 345 | 0.717949 | 0.979487 | 0.935897 | 0.75649  |
| 346 | 0.717949 | 0.979487 | 0.935897 | 0.75649  |
| 347 | 0.717949 | 0.979487 | 0.935897 | 0.75649  |
| 348 | 0.717949 | 0.979487 | 0.935897 | 0.75649  |
| 349 | 0.717949 | 0.979487 | 0.935897 | 0.75649  |
| 350 | 0.717949 | 0.979487 | 0.935897 | 0.75649  |
| 351 | 0.717949 | 0.979487 | 0.935897 | 0.75649  |
| 352 | 0.717949 | 0.979487 | 0.935897 | 0.75649  |
| 353 | 0.717949 | 0.984615 | 0.940171 | 0.772337 |
| 354 | 0.717949 | 0.979487 | 0.935897 | 0.75649  |
| 355 | 0.717949 | 0.974359 | 0.931624 | 0.7413   |
| 356 | 0.717949 | 0.974359 | 0.931624 | 0.7413   |
| 357 | 0.717949 | 0.974359 | 0.931624 | 0.7413   |
| 358 | 0.717949 | 0.974359 | 0.931624 | 0.7413   |
| 359 | 0.717949 | 0.979487 | 0.935897 | 0.75649  |
| 360 | 0.717949 | 0.979487 | 0.935897 | 0.75649  |
| 361 | 0.717949 | 0.979487 | 0.935897 | 0.75649  |

|     |          |          |          |          |
|-----|----------|----------|----------|----------|
| 362 | 0.717949 | 0.979487 | 0.935897 | 0.75649  |
| 363 | 0.717949 | 0.979487 | 0.935897 | 0.75649  |
| 364 | 0.717949 | 0.979487 | 0.935897 | 0.75649  |
| 365 | 0.717949 | 0.979487 | 0.935897 | 0.75649  |
| 366 | 0.717949 | 0.979487 | 0.935897 | 0.75649  |
| 367 | 0.717949 | 0.979487 | 0.935897 | 0.75649  |
| 368 | 0.717949 | 0.979487 | 0.935897 | 0.75649  |
| 369 | 0.717949 | 0.979487 | 0.935897 | 0.75649  |
| 370 | 0.717949 | 0.979487 | 0.935897 | 0.75649  |
| 371 | 0.717949 | 0.979487 | 0.935897 | 0.75649  |
| 372 | 0.717949 | 0.979487 | 0.935897 | 0.75649  |
| 373 | 0.717949 | 0.979487 | 0.935897 | 0.75649  |
| 374 | 0.717949 | 0.979487 | 0.935897 | 0.75649  |
| 375 | 0.717949 | 0.979487 | 0.935897 | 0.75649  |
| 376 | 0.717949 | 0.979487 | 0.935897 | 0.75649  |
| 377 | 0.717949 | 0.979487 | 0.935897 | 0.75649  |
| 378 | 0.717949 | 0.979487 | 0.935897 | 0.75649  |
| 379 | 0.717949 | 0.979487 | 0.935897 | 0.75649  |
| 380 | 0.717949 | 0.979487 | 0.935897 | 0.75649  |
| 381 | 0.717949 | 0.979487 | 0.935897 | 0.75649  |
| 382 | 0.717949 | 0.979487 | 0.935897 | 0.75649  |
| 383 | 0.717949 | 0.979487 | 0.935897 | 0.75649  |
| 384 | 0.717949 | 0.979487 | 0.935897 | 0.75649  |
| 385 | 0.717949 | 0.979487 | 0.935897 | 0.75649  |
| 386 | 0.717949 | 0.974359 | 0.931624 | 0.7413   |
| 387 | 0.717949 | 0.979487 | 0.935897 | 0.75649  |
| 388 | 0.692308 | 0.979487 | 0.931624 | 0.738512 |
| 389 | 0.692308 | 0.979487 | 0.931624 | 0.738512 |
| 390 | 0.692308 | 0.979487 | 0.931624 | 0.738512 |
| 391 | 0.692308 | 0.969231 | 0.923077 | 0.708353 |
| 392 | 0.692308 | 0.969231 | 0.923077 | 0.708353 |
| 393 | 0.692308 | 0.969231 | 0.923077 | 0.708353 |
| 394 | 0.692308 | 0.969231 | 0.923077 | 0.708353 |
| 395 | 0.692308 | 0.969231 | 0.923077 | 0.708353 |
| 396 | 0.692308 | 0.969231 | 0.923077 | 0.708353 |
| 397 | 0.692308 | 0.969231 | 0.923077 | 0.708353 |
| 398 | 0.692308 | 0.969231 | 0.923077 | 0.708353 |
| 399 | 0.692308 | 0.969231 | 0.923077 | 0.708353 |
| 400 | 0.692308 | 0.969231 | 0.923077 | 0.708353 |
| 401 | 0.692308 | 0.969231 | 0.923077 | 0.708353 |
| 402 | 0.692308 | 0.969231 | 0.923077 | 0.708353 |
| 403 | 0.692308 | 0.969231 | 0.923077 | 0.708353 |
| 404 | 0.666667 | 0.969231 | 0.918803 | 0.689741 |

|     |          |          |          |          |
|-----|----------|----------|----------|----------|
| 405 | 0.666667 | 0.969231 | 0.918803 | 0.689741 |
| 406 | 0.666667 | 0.969231 | 0.918803 | 0.689741 |
| 407 | 0.666667 | 0.969231 | 0.918803 | 0.689741 |
| 408 | 0.666667 | 0.969231 | 0.918803 | 0.689741 |
| 409 | 0.666667 | 0.969231 | 0.918803 | 0.689741 |
| 410 | 0.666667 | 0.969231 | 0.918803 | 0.689741 |
| 411 | 0.666667 | 0.969231 | 0.918803 | 0.689741 |
| 412 | 0.666667 | 0.974359 | 0.923077 | 0.704687 |
| 413 | 0.666667 | 0.974359 | 0.923077 | 0.704687 |
| 414 | 0.666667 | 0.974359 | 0.923077 | 0.704687 |
| 415 | 0.666667 | 0.974359 | 0.923077 | 0.704687 |
| 416 | 0.666667 | 0.974359 | 0.923077 | 0.704687 |
| 417 | 0.666667 | 0.974359 | 0.923077 | 0.704687 |
| 418 | 0.666667 | 0.974359 | 0.923077 | 0.704687 |
| 419 | 0.666667 | 0.974359 | 0.923077 | 0.704687 |
| 420 | 0.666667 | 0.974359 | 0.923077 | 0.704687 |
| 421 | 0.666667 | 0.974359 | 0.923077 | 0.704687 |
| 422 | 0.666667 | 0.974359 | 0.923077 | 0.704687 |
| 423 | 0.666667 | 0.979487 | 0.92735  | 0.720294 |
| 424 | 0.666667 | 0.979487 | 0.92735  | 0.720294 |
| 425 | 0.666667 | 0.979487 | 0.92735  | 0.720294 |
| 426 | 0.666667 | 0.974359 | 0.923077 | 0.704687 |
| 427 | 0.666667 | 0.974359 | 0.923077 | 0.704687 |
| 428 | 0.666667 | 0.974359 | 0.923077 | 0.704687 |
| 429 | 0.666667 | 0.979487 | 0.92735  | 0.720294 |
| 430 | 0.641026 | 0.969231 | 0.91453  | 0.670862 |
| 431 | 0.641026 | 0.969231 | 0.91453  | 0.670862 |
| 432 | 0.641026 | 0.969231 | 0.91453  | 0.670862 |
| 433 | 0.641026 | 0.974359 | 0.918803 | 0.685994 |
| 434 | 0.666667 | 0.974359 | 0.923077 | 0.704687 |
| 435 | 0.666667 | 0.974359 | 0.923077 | 0.704687 |
| 436 | 0.666667 | 0.974359 | 0.923077 | 0.704687 |
| 437 | 0.692308 | 0.974359 | 0.92735  | 0.723116 |
| 438 | 0.692308 | 0.974359 | 0.92735  | 0.723116 |
| 439 | 0.692308 | 0.974359 | 0.92735  | 0.723116 |
| 440 | 0.692308 | 0.974359 | 0.92735  | 0.723116 |
| 441 | 0.692308 | 0.974359 | 0.92735  | 0.723116 |
| 442 | 0.692308 | 0.974359 | 0.92735  | 0.723116 |
| 443 | 0.692308 | 0.974359 | 0.92735  | 0.723116 |
| 444 | 0.692308 | 0.974359 | 0.92735  | 0.723116 |
| 445 | 0.692308 | 0.974359 | 0.92735  | 0.723116 |
| 446 | 0.692308 | 0.974359 | 0.92735  | 0.723116 |
| 447 | 0.692308 | 0.974359 | 0.92735  | 0.723116 |

|     |          |          |          |          |
|-----|----------|----------|----------|----------|
| 448 | 0.692308 | 0.974359 | 0.92735  | 0.723116 |
| 449 | 0.692308 | 0.974359 | 0.92735  | 0.723116 |
| 450 | 0.692308 | 0.974359 | 0.92735  | 0.723116 |
| 451 | 0.692308 | 0.974359 | 0.92735  | 0.723116 |
| 452 | 0.692308 | 0.974359 | 0.92735  | 0.723116 |
| 453 | 0.692308 | 0.974359 | 0.92735  | 0.723116 |
| 454 | 0.692308 | 0.974359 | 0.92735  | 0.723116 |
| 455 | 0.692308 | 0.974359 | 0.92735  | 0.723116 |
| 456 | 0.692308 | 0.974359 | 0.92735  | 0.723116 |
| 457 | 0.692308 | 0.974359 | 0.92735  | 0.723116 |
| 458 | 0.74359  | 0.979487 | 0.940171 | 0.774246 |
| 459 | 0.74359  | 0.979487 | 0.940171 | 0.774246 |
| 460 | 0.74359  | 0.979487 | 0.940171 | 0.774246 |
| 461 | 0.74359  | 0.979487 | 0.940171 | 0.774246 |
| 462 | 0.74359  | 0.984615 | 0.944444 | 0.789865 |
| 463 | 0.74359  | 0.984615 | 0.944444 | 0.789865 |
| 464 | 0.74359  | 0.984615 | 0.944444 | 0.789865 |
| 465 | 0.74359  | 0.984615 | 0.944444 | 0.789865 |
| 466 | 0.74359  | 0.984615 | 0.944444 | 0.789865 |
| 467 | 0.74359  | 0.984615 | 0.944444 | 0.789865 |
| 468 | 0.74359  | 0.984615 | 0.944444 | 0.789865 |
| 469 | 0.74359  | 0.984615 | 0.944444 | 0.789865 |
| 470 | 0.74359  | 0.984615 | 0.944444 | 0.789865 |
| 471 | 0.717949 | 0.984615 | 0.940171 | 0.772337 |
| 472 | 0.717949 | 0.984615 | 0.940171 | 0.772337 |
| 473 | 0.717949 | 0.984615 | 0.940171 | 0.772337 |
| 474 | 0.717949 | 0.984615 | 0.940171 | 0.772337 |
| 475 | 0.717949 | 0.984615 | 0.940171 | 0.772337 |
| 476 | 0.717949 | 0.984615 | 0.940171 | 0.772337 |
| 477 | 0.717949 | 0.984615 | 0.940171 | 0.772337 |
| 478 | 0.717949 | 0.984615 | 0.940171 | 0.772337 |
| 479 | 0.717949 | 0.984615 | 0.940171 | 0.772337 |
| 480 | 0.717949 | 0.984615 | 0.940171 | 0.772337 |
| 481 | 0.717949 | 0.984615 | 0.940171 | 0.772337 |
| 482 | 0.717949 | 0.984615 | 0.940171 | 0.772337 |
| 483 | 0.717949 | 0.984615 | 0.940171 | 0.772337 |
| 484 | 0.717949 | 0.984615 | 0.940171 | 0.772337 |
| 485 | 0.717949 | 0.984615 | 0.940171 | 0.772337 |
| 486 | 0.717949 | 0.984615 | 0.940171 | 0.772337 |
| 487 | 0.717949 | 0.984615 | 0.940171 | 0.772337 |
| 488 | 0.717949 | 0.984615 | 0.940171 | 0.772337 |
| 489 | 0.717949 | 0.984615 | 0.940171 | 0.772337 |
| 490 | 0.717949 | 0.984615 | 0.940171 | 0.772337 |

|     |          |          |          |          |
|-----|----------|----------|----------|----------|
| 491 | 0.717949 | 0.984615 | 0.940171 | 0.772337 |
| 492 | 0.717949 | 0.984615 | 0.940171 | 0.772337 |
| 493 | 0.717949 | 0.984615 | 0.940171 | 0.772337 |
| 494 | 0.717949 | 0.984615 | 0.940171 | 0.772337 |
| 495 | 0.692308 | 0.984615 | 0.935897 | 0.754594 |
| 496 | 0.692308 | 0.984615 | 0.935897 | 0.754594 |
| 497 | 0.692308 | 0.984615 | 0.935897 | 0.754594 |
| 498 | 0.692308 | 0.984615 | 0.935897 | 0.754594 |
| 499 | 0.692308 | 0.984615 | 0.935897 | 0.754594 |
| 500 | 0.692308 | 0.984615 | 0.935897 | 0.754594 |

(9) Dataset  $D_9$

| Number of features | SN       | SP       | ACC      | MCC      |
|--------------------|----------|----------|----------|----------|
| 4                  | 0.589744 | 0.964103 | 0.901709 | 0.617395 |
| 5                  | 0.589744 | 0.958974 | 0.897436 | 0.603212 |
| 6                  | 0.589744 | 0.964103 | 0.901709 | 0.617395 |
| 7                  | 0.589744 | 0.974359 | 0.910256 | 0.647732 |
| 8                  | 0.589744 | 0.964103 | 0.901709 | 0.617395 |
| 9                  | 0.564103 | 0.979487 | 0.910256 | 0.644618 |
| 10                 | 0.589744 | 0.974359 | 0.910256 | 0.647732 |
| 11                 | 0.564103 | 0.969231 | 0.901709 | 0.612401 |
| 12                 | 0.615385 | 0.974359 | 0.91453  | 0.667017 |
| 13                 | 0.589744 | 0.974359 | 0.910256 | 0.647732 |
| 14                 | 0.538462 | 0.969231 | 0.897436 | 0.59222  |
| 15                 | 0.538462 | 0.974359 | 0.901709 | 0.60813  |
| 16                 | 0.564103 | 0.979487 | 0.910256 | 0.644618 |
| 17                 | 0.615385 | 0.974359 | 0.91453  | 0.667017 |
| 18                 | 0.589744 | 0.979487 | 0.91453  | 0.664004 |
| 19                 | 0.589744 | 0.979487 | 0.91453  | 0.664004 |
| 20                 | 0.589744 | 0.974359 | 0.910256 | 0.647732 |
| 21                 | 0.589744 | 0.974359 | 0.910256 | 0.647732 |
| 22                 | 0.589744 | 0.964103 | 0.901709 | 0.617395 |
| 23                 | 0.589744 | 0.964103 | 0.901709 | 0.617395 |
| 24                 | 0.641026 | 0.969231 | 0.91453  | 0.670862 |
| 25                 | 0.641026 | 0.969231 | 0.91453  | 0.670862 |
| 26                 | 0.641026 | 0.974359 | 0.918803 | 0.685994 |
| 27                 | 0.615385 | 0.974359 | 0.91453  | 0.667017 |
| 28                 | 0.589744 | 0.979487 | 0.91453  | 0.664004 |
| 29                 | 0.589744 | 0.979487 | 0.91453  | 0.664004 |
| 30                 | 0.589744 | 0.974359 | 0.910256 | 0.647732 |
| 31                 | 0.589744 | 0.964103 | 0.901709 | 0.617395 |
| 32                 | 0.589744 | 0.969231 | 0.905983 | 0.632216 |

|    |          |          |          |          |
|----|----------|----------|----------|----------|
| 33 | 0.564103 | 0.974359 | 0.905983 | 0.628112 |
| 34 | 0.564103 | 0.979487 | 0.910256 | 0.644618 |
| 35 | 0.589744 | 0.964103 | 0.901709 | 0.617395 |
| 36 | 0.564103 | 0.964103 | 0.897436 | 0.597415 |
| 37 | 0.564103 | 0.958974 | 0.893162 | 0.583095 |
| 38 | 0.589744 | 0.964103 | 0.901709 | 0.617395 |
| 39 | 0.589744 | 0.964103 | 0.901709 | 0.617395 |
| 40 | 0.589744 | 0.964103 | 0.901709 | 0.617395 |
| 41 | 0.589744 | 0.958974 | 0.897436 | 0.603212 |
| 42 | 0.589744 | 0.958974 | 0.897436 | 0.603212 |
| 43 | 0.589744 | 0.958974 | 0.897436 | 0.603212 |
| 44 | 0.589744 | 0.958974 | 0.897436 | 0.603212 |
| 45 | 0.589744 | 0.964103 | 0.901709 | 0.617395 |
| 46 | 0.589744 | 0.969231 | 0.905983 | 0.632216 |
| 47 | 0.589744 | 0.974359 | 0.910256 | 0.647732 |
| 48 | 0.589744 | 0.974359 | 0.910256 | 0.647732 |
| 49 | 0.589744 | 0.974359 | 0.910256 | 0.647732 |
| 50 | 0.589744 | 0.974359 | 0.910256 | 0.647732 |
| 51 | 0.589744 | 0.974359 | 0.910256 | 0.647732 |
| 52 | 0.589744 | 0.974359 | 0.910256 | 0.647732 |
| 53 | 0.589744 | 0.974359 | 0.910256 | 0.647732 |
| 54 | 0.641026 | 0.974359 | 0.918803 | 0.685994 |
| 55 | 0.666667 | 0.974359 | 0.923077 | 0.704687 |
| 56 | 0.641026 | 0.979487 | 0.923077 | 0.701818 |
| 57 | 0.641026 | 0.979487 | 0.923077 | 0.701818 |
| 58 | 0.641026 | 0.979487 | 0.923077 | 0.701818 |
| 59 | 0.615385 | 0.979487 | 0.918803 | 0.683062 |
| 60 | 0.615385 | 0.979487 | 0.918803 | 0.683062 |
| 61 | 0.615385 | 0.974359 | 0.91453  | 0.667017 |
| 62 | 0.615385 | 0.974359 | 0.91453  | 0.667017 |
| 63 | 0.589744 | 0.974359 | 0.910256 | 0.647732 |
| 64 | 0.589744 | 0.969231 | 0.905983 | 0.632216 |
| 65 | 0.589744 | 0.974359 | 0.910256 | 0.647732 |
| 66 | 0.589744 | 0.969231 | 0.905983 | 0.632216 |
| 67 | 0.641026 | 0.969231 | 0.91453  | 0.670862 |
| 68 | 0.615385 | 0.969231 | 0.910256 | 0.651695 |
| 69 | 0.641026 | 0.969231 | 0.91453  | 0.670862 |
| 70 | 0.589744 | 0.964103 | 0.901709 | 0.617395 |
| 71 | 0.589744 | 0.964103 | 0.901709 | 0.617395 |
| 72 | 0.589744 | 0.964103 | 0.901709 | 0.617395 |
| 73 | 0.589744 | 0.964103 | 0.901709 | 0.617395 |
| 74 | 0.589744 | 0.964103 | 0.901709 | 0.617395 |
| 75 | 0.615385 | 0.964103 | 0.905983 | 0.637037 |

|     |          |          |          |          |
|-----|----------|----------|----------|----------|
| 76  | 0.615385 | 0.958974 | 0.901709 | 0.622992 |
| 77  | 0.615385 | 0.958974 | 0.901709 | 0.622992 |
| 78  | 0.615385 | 0.958974 | 0.901709 | 0.622992 |
| 79  | 0.615385 | 0.958974 | 0.901709 | 0.622992 |
| 80  | 0.615385 | 0.958974 | 0.901709 | 0.622992 |
| 81  | 0.615385 | 0.958974 | 0.901709 | 0.622992 |
| 82  | 0.564103 | 0.958974 | 0.893162 | 0.583095 |
| 83  | 0.589744 | 0.958974 | 0.897436 | 0.603212 |
| 84  | 0.589744 | 0.958974 | 0.897436 | 0.603212 |
| 85  | 0.564103 | 0.964103 | 0.897436 | 0.597415 |
| 86  | 0.564103 | 0.964103 | 0.897436 | 0.597415 |
| 87  | 0.538462 | 0.964103 | 0.893162 | 0.57707  |
| 88  | 0.538462 | 0.958974 | 0.888889 | 0.562614 |
| 89  | 0.538462 | 0.958974 | 0.888889 | 0.562614 |
| 90  | 0.538462 | 0.958974 | 0.888889 | 0.562614 |
| 91  | 0.538462 | 0.958974 | 0.888889 | 0.562614 |
| 92  | 0.538462 | 0.964103 | 0.893162 | 0.57707  |
| 93  | 0.538462 | 0.958974 | 0.888889 | 0.562614 |
| 94  | 0.538462 | 0.958974 | 0.888889 | 0.562614 |
| 95  | 0.564103 | 0.958974 | 0.893162 | 0.583095 |
| 96  | 0.538462 | 0.958974 | 0.888889 | 0.562614 |
| 97  | 0.564103 | 0.958974 | 0.893162 | 0.583095 |
| 98  | 0.538462 | 0.958974 | 0.888889 | 0.562614 |
| 99  | 0.564103 | 0.958974 | 0.893162 | 0.583095 |
| 100 | 0.538462 | 0.958974 | 0.888889 | 0.562614 |
| 101 | 0.538462 | 0.958974 | 0.888889 | 0.562614 |
| 102 | 0.538462 | 0.958974 | 0.888889 | 0.562614 |
| 103 | 0.564103 | 0.958974 | 0.893162 | 0.583095 |
| 104 | 0.564103 | 0.958974 | 0.893162 | 0.583095 |
| 105 | 0.538462 | 0.958974 | 0.888889 | 0.562614 |
| 106 | 0.589744 | 0.958974 | 0.897436 | 0.603212 |
| 107 | 0.615385 | 0.964103 | 0.905983 | 0.637037 |
| 108 | 0.615385 | 0.964103 | 0.905983 | 0.637037 |
| 109 | 0.615385 | 0.964103 | 0.905983 | 0.637037 |
| 110 | 0.615385 | 0.964103 | 0.905983 | 0.637037 |
| 111 | 0.615385 | 0.964103 | 0.905983 | 0.637037 |
| 112 | 0.615385 | 0.958974 | 0.901709 | 0.622992 |
| 113 | 0.589744 | 0.958974 | 0.897436 | 0.603212 |
| 114 | 0.589744 | 0.958974 | 0.897436 | 0.603212 |
| 115 | 0.589744 | 0.958974 | 0.897436 | 0.603212 |
| 116 | 0.589744 | 0.958974 | 0.897436 | 0.603212 |
| 117 | 0.589744 | 0.958974 | 0.897436 | 0.603212 |
| 118 | 0.615385 | 0.958974 | 0.901709 | 0.622992 |



|     |          |          |          |          |
|-----|----------|----------|----------|----------|
| 119 | 0.615385 | 0.958974 | 0.901709 | 0.622992 |
| 120 | 0.615385 | 0.958974 | 0.901709 | 0.622992 |
| 121 | 0.589744 | 0.958974 | 0.897436 | 0.603212 |
| 122 | 0.589744 | 0.958974 | 0.897436 | 0.603212 |
| 123 | 0.615385 | 0.958974 | 0.901709 | 0.622992 |
| 124 | 0.589744 | 0.958974 | 0.897436 | 0.603212 |
| 125 | 0.641026 | 0.958974 | 0.905983 | 0.64246  |
| 126 | 0.615385 | 0.958974 | 0.901709 | 0.622992 |
| 127 | 0.641026 | 0.953846 | 0.901709 | 0.629098 |
| 128 | 0.641026 | 0.958974 | 0.905983 | 0.64246  |
| 129 | 0.641026 | 0.958974 | 0.905983 | 0.64246  |
| 130 | 0.641026 | 0.958974 | 0.905983 | 0.64246  |
| 131 | 0.615385 | 0.958974 | 0.901709 | 0.622992 |
| 132 | 0.615385 | 0.958974 | 0.901709 | 0.622992 |
| 133 | 0.615385 | 0.958974 | 0.901709 | 0.622992 |
| 134 | 0.615385 | 0.958974 | 0.901709 | 0.622992 |
| 135 | 0.641026 | 0.958974 | 0.905983 | 0.64246  |
| 136 | 0.615385 | 0.964103 | 0.905983 | 0.637037 |
| 137 | 0.641026 | 0.964103 | 0.910256 | 0.656366 |
| 138 | 0.641026 | 0.964103 | 0.910256 | 0.656366 |
| 139 | 0.615385 | 0.958974 | 0.901709 | 0.622992 |
| 140 | 0.615385 | 0.958974 | 0.901709 | 0.622992 |
| 141 | 0.641026 | 0.958974 | 0.905983 | 0.64246  |
| 142 | 0.615385 | 0.958974 | 0.901709 | 0.622992 |
| 143 | 0.641026 | 0.958974 | 0.905983 | 0.64246  |
| 144 | 0.615385 | 0.964103 | 0.905983 | 0.637037 |
| 145 | 0.641026 | 0.964103 | 0.910256 | 0.656366 |
| 146 | 0.641026 | 0.964103 | 0.910256 | 0.656366 |
| 147 | 0.641026 | 0.964103 | 0.910256 | 0.656366 |
| 148 | 0.615385 | 0.964103 | 0.905983 | 0.637037 |
| 149 | 0.615385 | 0.953846 | 0.897436 | 0.609513 |
| 150 | 0.615385 | 0.953846 | 0.897436 | 0.609513 |
| 151 | 0.589744 | 0.958974 | 0.897436 | 0.603212 |
| 152 | 0.615385 | 0.948718 | 0.893162 | 0.596559 |
| 153 | 0.589744 | 0.958974 | 0.897436 | 0.603212 |
| 154 | 0.564103 | 0.964103 | 0.897436 | 0.597415 |
| 155 | 0.589744 | 0.964103 | 0.901709 | 0.617395 |
| 156 | 0.564103 | 0.964103 | 0.897436 | 0.597415 |
| 157 | 0.564103 | 0.964103 | 0.897436 | 0.597415 |
| 158 | 0.589744 | 0.964103 | 0.901709 | 0.617395 |
| 159 | 0.589744 | 0.964103 | 0.901709 | 0.617395 |
| 160 | 0.589744 | 0.964103 | 0.901709 | 0.617395 |
| 161 | 0.564103 | 0.964103 | 0.897436 | 0.597415 |

|     |          |          |          |          |
|-----|----------|----------|----------|----------|
| 162 | 0.564103 | 0.964103 | 0.897436 | 0.597415 |
| 163 | 0.564103 | 0.964103 | 0.897436 | 0.597415 |
| 164 | 0.564103 | 0.964103 | 0.897436 | 0.597415 |
| 165 | 0.564103 | 0.964103 | 0.897436 | 0.597415 |
| 166 | 0.589744 | 0.964103 | 0.901709 | 0.617395 |
| 167 | 0.589744 | 0.958974 | 0.897436 | 0.603212 |
| 168 | 0.564103 | 0.964103 | 0.897436 | 0.597415 |
| 169 | 0.538462 | 0.964103 | 0.893162 | 0.57707  |
| 170 | 0.564103 | 0.958974 | 0.893162 | 0.583095 |
| 171 | 0.564103 | 0.958974 | 0.893162 | 0.583095 |
| 172 | 0.564103 | 0.958974 | 0.893162 | 0.583095 |
| 173 | 0.564103 | 0.958974 | 0.893162 | 0.583095 |
| 174 | 0.538462 | 0.953846 | 0.884615 | 0.548795 |
| 175 | 0.564103 | 0.953846 | 0.888889 | 0.569387 |
| 176 | 0.538462 | 0.953846 | 0.884615 | 0.548795 |
| 177 | 0.564103 | 0.953846 | 0.888889 | 0.569387 |
| 178 | 0.538462 | 0.948718 | 0.880342 | 0.535562 |
| 179 | 0.564103 | 0.948718 | 0.884615 | 0.556243 |
| 180 | 0.564103 | 0.948718 | 0.884615 | 0.556243 |
| 181 | 0.589744 | 0.964103 | 0.901709 | 0.617395 |
| 182 | 0.589744 | 0.964103 | 0.901709 | 0.617395 |
| 183 | 0.564103 | 0.964103 | 0.897436 | 0.597415 |
| 184 | 0.564103 | 0.958974 | 0.893162 | 0.583095 |
| 185 | 0.564103 | 0.953846 | 0.888889 | 0.569387 |
| 186 | 0.564103 | 0.953846 | 0.888889 | 0.569387 |
| 187 | 0.564103 | 0.953846 | 0.888889 | 0.569387 |
| 188 | 0.564103 | 0.953846 | 0.888889 | 0.569387 |
| 189 | 0.564103 | 0.964103 | 0.897436 | 0.597415 |
| 190 | 0.538462 | 0.964103 | 0.893162 | 0.57707  |
| 191 | 0.538462 | 0.964103 | 0.893162 | 0.57707  |
| 192 | 0.538462 | 0.964103 | 0.893162 | 0.57707  |
| 193 | 0.564103 | 0.964103 | 0.897436 | 0.597415 |
| 194 | 0.564103 | 0.964103 | 0.897436 | 0.597415 |
| 195 | 0.589744 | 0.958974 | 0.897436 | 0.603212 |
| 196 | 0.564103 | 0.958974 | 0.893162 | 0.583095 |
| 197 | 0.564103 | 0.958974 | 0.893162 | 0.583095 |
| 198 | 0.564103 | 0.964103 | 0.897436 | 0.597415 |
| 199 | 0.564103 | 0.964103 | 0.897436 | 0.597415 |
| 200 | 0.564103 | 0.958974 | 0.893162 | 0.583095 |
| 201 | 0.564103 | 0.958974 | 0.893162 | 0.583095 |
| 202 | 0.538462 | 0.958974 | 0.888889 | 0.562614 |
| 203 | 0.538462 | 0.964103 | 0.893162 | 0.57707  |
| 204 | 0.538462 | 0.958974 | 0.888889 | 0.562614 |

|     |          |          |          |          |
|-----|----------|----------|----------|----------|
| 205 | 0.564103 | 0.958974 | 0.893162 | 0.583095 |
| 206 | 0.538462 | 0.958974 | 0.888889 | 0.562614 |
| 207 | 0.538462 | 0.958974 | 0.888889 | 0.562614 |
| 208 | 0.538462 | 0.958974 | 0.888889 | 0.562614 |
| 209 | 0.538462 | 0.958974 | 0.888889 | 0.562614 |
| 210 | 0.538462 | 0.958974 | 0.888889 | 0.562614 |
| 211 | 0.564103 | 0.958974 | 0.893162 | 0.583095 |
| 212 | 0.564103 | 0.958974 | 0.893162 | 0.583095 |
| 213 | 0.538462 | 0.958974 | 0.888889 | 0.562614 |
| 214 | 0.538462 | 0.958974 | 0.888889 | 0.562614 |
| 215 | 0.564103 | 0.958974 | 0.893162 | 0.583095 |
| 216 | 0.538462 | 0.958974 | 0.888889 | 0.562614 |
| 217 | 0.538462 | 0.958974 | 0.888889 | 0.562614 |
| 218 | 0.538462 | 0.958974 | 0.888889 | 0.562614 |
| 219 | 0.538462 | 0.953846 | 0.884615 | 0.548795 |
| 220 | 0.538462 | 0.953846 | 0.884615 | 0.548795 |
| 221 | 0.589744 | 0.953846 | 0.893162 | 0.589617 |
| 222 | 0.589744 | 0.953846 | 0.893162 | 0.589617 |
| 223 | 0.589744 | 0.953846 | 0.893162 | 0.589617 |
| 224 | 0.589744 | 0.953846 | 0.893162 | 0.589617 |
| 225 | 0.589744 | 0.953846 | 0.893162 | 0.589617 |
| 226 | 0.589744 | 0.953846 | 0.893162 | 0.589617 |
| 227 | 0.589744 | 0.953846 | 0.893162 | 0.589617 |
| 228 | 0.589744 | 0.953846 | 0.893162 | 0.589617 |
| 229 | 0.589744 | 0.953846 | 0.893162 | 0.589617 |
| 230 | 0.589744 | 0.953846 | 0.893162 | 0.589617 |
| 231 | 0.589744 | 0.953846 | 0.893162 | 0.589617 |
| 232 | 0.589744 | 0.953846 | 0.893162 | 0.589617 |
| 233 | 0.589744 | 0.953846 | 0.893162 | 0.589617 |
| 234 | 0.589744 | 0.953846 | 0.893162 | 0.589617 |
| 235 | 0.615385 | 0.948718 | 0.893162 | 0.596559 |
| 236 | 0.615385 | 0.948718 | 0.893162 | 0.596559 |
| 237 | 0.615385 | 0.948718 | 0.893162 | 0.596559 |
| 238 | 0.615385 | 0.953846 | 0.897436 | 0.609513 |
| 239 | 0.615385 | 0.953846 | 0.897436 | 0.609513 |
| 240 | 0.615385 | 0.948718 | 0.893162 | 0.596559 |
| 241 | 0.615385 | 0.953846 | 0.897436 | 0.609513 |
| 242 | 0.615385 | 0.953846 | 0.897436 | 0.609513 |
| 243 | 0.615385 | 0.948718 | 0.893162 | 0.596559 |
| 244 | 0.615385 | 0.948718 | 0.893162 | 0.596559 |
| 245 | 0.615385 | 0.948718 | 0.893162 | 0.596559 |
| 246 | 0.589744 | 0.948718 | 0.888889 | 0.576566 |
| 247 | 0.589744 | 0.94359  | 0.884615 | 0.564019 |

|     |          |          |          |          |
|-----|----------|----------|----------|----------|
| 248 | 0.615385 | 0.94359  | 0.888889 | 0.584092 |
| 249 | 0.615385 | 0.94359  | 0.888889 | 0.584092 |
| 250 | 0.615385 | 0.94359  | 0.888889 | 0.584092 |
| 251 | 0.615385 | 0.94359  | 0.888889 | 0.584092 |
| 252 | 0.615385 | 0.938462 | 0.884615 | 0.572078 |
| 253 | 0.615385 | 0.938462 | 0.884615 | 0.572078 |
| 254 | 0.615385 | 0.94359  | 0.888889 | 0.584092 |
| 255 | 0.615385 | 0.94359  | 0.888889 | 0.584092 |
| 256 | 0.615385 | 0.94359  | 0.888889 | 0.584092 |
| 257 | 0.615385 | 0.94359  | 0.888889 | 0.584092 |
| 258 | 0.615385 | 0.94359  | 0.888889 | 0.584092 |
| 259 | 0.615385 | 0.94359  | 0.888889 | 0.584092 |
| 260 | 0.615385 | 0.94359  | 0.888889 | 0.584092 |
| 261 | 0.615385 | 0.94359  | 0.888889 | 0.584092 |
| 262 | 0.615385 | 0.94359  | 0.888889 | 0.584092 |
| 263 | 0.615385 | 0.94359  | 0.888889 | 0.584092 |
| 264 | 0.615385 | 0.94359  | 0.888889 | 0.584092 |
| 265 | 0.615385 | 0.94359  | 0.888889 | 0.584092 |
| 266 | 0.615385 | 0.94359  | 0.888889 | 0.584092 |
| 267 | 0.615385 | 0.94359  | 0.888889 | 0.584092 |
| 268 | 0.615385 | 0.94359  | 0.888889 | 0.584092 |
| 269 | 0.615385 | 0.94359  | 0.888889 | 0.584092 |
| 270 | 0.615385 | 0.948718 | 0.893162 | 0.596559 |
| 271 | 0.615385 | 0.948718 | 0.893162 | 0.596559 |
| 272 | 0.615385 | 0.948718 | 0.893162 | 0.596559 |
| 273 | 0.615385 | 0.948718 | 0.893162 | 0.596559 |
| 274 | 0.615385 | 0.948718 | 0.893162 | 0.596559 |
| 275 | 0.615385 | 0.948718 | 0.893162 | 0.596559 |
| 276 | 0.615385 | 0.948718 | 0.893162 | 0.596559 |
| 277 | 0.615385 | 0.948718 | 0.893162 | 0.596559 |
| 278 | 0.589744 | 0.953846 | 0.893162 | 0.589617 |
| 279 | 0.589744 | 0.953846 | 0.893162 | 0.589617 |
| 280 | 0.589744 | 0.953846 | 0.893162 | 0.589617 |
| 281 | 0.589744 | 0.953846 | 0.893162 | 0.589617 |
| 282 | 0.589744 | 0.953846 | 0.893162 | 0.589617 |
| 283 | 0.589744 | 0.953846 | 0.893162 | 0.589617 |
| 284 | 0.589744 | 0.953846 | 0.893162 | 0.589617 |
| 285 | 0.589744 | 0.958974 | 0.897436 | 0.603212 |
| 286 | 0.589744 | 0.953846 | 0.893162 | 0.589617 |
| 287 | 0.589744 | 0.953846 | 0.893162 | 0.589617 |
| 288 | 0.589744 | 0.958974 | 0.897436 | 0.603212 |
| 289 | 0.615385 | 0.953846 | 0.897436 | 0.609513 |
| 290 | 0.615385 | 0.948718 | 0.893162 | 0.596559 |

|     |          |          |          |          |
|-----|----------|----------|----------|----------|
| 291 | 0.615385 | 0.948718 | 0.893162 | 0.596559 |
| 292 | 0.615385 | 0.948718 | 0.893162 | 0.596559 |
| 293 | 0.615385 | 0.948718 | 0.893162 | 0.596559 |
| 294 | 0.615385 | 0.953846 | 0.897436 | 0.609513 |
| 295 | 0.589744 | 0.953846 | 0.893162 | 0.589617 |
| 296 | 0.589744 | 0.953846 | 0.893162 | 0.589617 |
| 297 | 0.589744 | 0.953846 | 0.893162 | 0.589617 |
| 298 | 0.589744 | 0.958974 | 0.897436 | 0.603212 |
| 299 | 0.564103 | 0.958974 | 0.893162 | 0.583095 |
| 300 | 0.564103 | 0.958974 | 0.893162 | 0.583095 |
| 301 | 0.564103 | 0.958974 | 0.893162 | 0.583095 |
| 302 | 0.564103 | 0.958974 | 0.893162 | 0.583095 |
| 303 | 0.564103 | 0.958974 | 0.893162 | 0.583095 |
| 304 | 0.564103 | 0.958974 | 0.893162 | 0.583095 |
| 305 | 0.564103 | 0.958974 | 0.893162 | 0.583095 |
| 306 | 0.564103 | 0.958974 | 0.893162 | 0.583095 |
| 307 | 0.564103 | 0.958974 | 0.893162 | 0.583095 |
| 308 | 0.589744 | 0.953846 | 0.893162 | 0.589617 |
| 309 | 0.589744 | 0.953846 | 0.893162 | 0.589617 |
| 310 | 0.589744 | 0.953846 | 0.893162 | 0.589617 |
| 311 | 0.589744 | 0.953846 | 0.893162 | 0.589617 |
| 312 | 0.589744 | 0.953846 | 0.893162 | 0.589617 |
| 313 | 0.589744 | 0.953846 | 0.893162 | 0.589617 |
| 314 | 0.589744 | 0.953846 | 0.893162 | 0.589617 |
| 315 | 0.589744 | 0.953846 | 0.893162 | 0.589617 |
| 316 | 0.589744 | 0.953846 | 0.893162 | 0.589617 |
| 317 | 0.589744 | 0.953846 | 0.893162 | 0.589617 |
| 318 | 0.589744 | 0.953846 | 0.893162 | 0.589617 |
| 319 | 0.589744 | 0.953846 | 0.893162 | 0.589617 |
| 320 | 0.589744 | 0.953846 | 0.893162 | 0.589617 |
| 321 | 0.589744 | 0.953846 | 0.893162 | 0.589617 |
| 322 | 0.589744 | 0.953846 | 0.893162 | 0.589617 |
| 323 | 0.589744 | 0.953846 | 0.893162 | 0.589617 |
| 324 | 0.589744 | 0.953846 | 0.893162 | 0.589617 |
| 325 | 0.589744 | 0.953846 | 0.893162 | 0.589617 |
| 326 | 0.589744 | 0.953846 | 0.893162 | 0.589617 |
| 327 | 0.615385 | 0.953846 | 0.897436 | 0.609513 |
| 328 | 0.615385 | 0.953846 | 0.897436 | 0.609513 |
| 329 | 0.615385 | 0.953846 | 0.897436 | 0.609513 |
| 330 | 0.615385 | 0.953846 | 0.897436 | 0.609513 |
| 331 | 0.615385 | 0.953846 | 0.897436 | 0.609513 |
| 332 | 0.615385 | 0.953846 | 0.897436 | 0.609513 |
| 333 | 0.615385 | 0.953846 | 0.897436 | 0.609513 |

|     |          |          |          |          |
|-----|----------|----------|----------|----------|
| 334 | 0.589744 | 0.953846 | 0.893162 | 0.589617 |
| 335 | 0.589744 | 0.953846 | 0.893162 | 0.589617 |
| 336 | 0.589744 | 0.953846 | 0.893162 | 0.589617 |
| 337 | 0.615385 | 0.953846 | 0.897436 | 0.609513 |
| 338 | 0.615385 | 0.953846 | 0.897436 | 0.609513 |
| 339 | 0.615385 | 0.953846 | 0.897436 | 0.609513 |
| 340 | 0.615385 | 0.953846 | 0.897436 | 0.609513 |
| 341 | 0.615385 | 0.948718 | 0.893162 | 0.596559 |
| 342 | 0.615385 | 0.948718 | 0.893162 | 0.596559 |
| 343 | 0.641026 | 0.948718 | 0.897436 | 0.616243 |
| 344 | 0.641026 | 0.953846 | 0.901709 | 0.629098 |
| 345 | 0.615385 | 0.948718 | 0.893162 | 0.596559 |
| 346 | 0.615385 | 0.948718 | 0.893162 | 0.596559 |
| 347 | 0.615385 | 0.948718 | 0.893162 | 0.596559 |
| 348 | 0.615385 | 0.948718 | 0.893162 | 0.596559 |
| 349 | 0.615385 | 0.948718 | 0.893162 | 0.596559 |
| 350 | 0.615385 | 0.948718 | 0.893162 | 0.596559 |
| 351 | 0.615385 | 0.948718 | 0.893162 | 0.596559 |
| 352 | 0.615385 | 0.948718 | 0.893162 | 0.596559 |
| 353 | 0.615385 | 0.948718 | 0.893162 | 0.596559 |
| 354 | 0.615385 | 0.948718 | 0.893162 | 0.596559 |
| 355 | 0.615385 | 0.948718 | 0.893162 | 0.596559 |
| 356 | 0.589744 | 0.948718 | 0.888889 | 0.576566 |
| 357 | 0.589744 | 0.948718 | 0.888889 | 0.576566 |
| 358 | 0.589744 | 0.953846 | 0.893162 | 0.589617 |
| 359 | 0.589744 | 0.953846 | 0.893162 | 0.589617 |
| 360 | 0.589744 | 0.953846 | 0.893162 | 0.589617 |
| 361 | 0.589744 | 0.953846 | 0.893162 | 0.589617 |
| 362 | 0.589744 | 0.958974 | 0.897436 | 0.603212 |
| 363 | 0.589744 | 0.958974 | 0.897436 | 0.603212 |
| 364 | 0.589744 | 0.958974 | 0.897436 | 0.603212 |
| 365 | 0.589744 | 0.958974 | 0.897436 | 0.603212 |
| 366 | 0.589744 | 0.958974 | 0.897436 | 0.603212 |
| 367 | 0.589744 | 0.958974 | 0.897436 | 0.603212 |
| 368 | 0.589744 | 0.958974 | 0.897436 | 0.603212 |
| 369 | 0.589744 | 0.958974 | 0.897436 | 0.603212 |
| 370 | 0.589744 | 0.958974 | 0.897436 | 0.603212 |
| 371 | 0.589744 | 0.958974 | 0.897436 | 0.603212 |
| 372 | 0.589744 | 0.958974 | 0.897436 | 0.603212 |
| 373 | 0.589744 | 0.953846 | 0.893162 | 0.589617 |
| 374 | 0.564103 | 0.958974 | 0.893162 | 0.583095 |
| 375 | 0.564103 | 0.958974 | 0.893162 | 0.583095 |
| 376 | 0.564103 | 0.958974 | 0.893162 | 0.583095 |

|     |          |          |          |          |
|-----|----------|----------|----------|----------|
| 377 | 0.564103 | 0.958974 | 0.893162 | 0.583095 |
| 378 | 0.564103 | 0.953846 | 0.888889 | 0.569387 |
| 379 | 0.564103 | 0.953846 | 0.888889 | 0.569387 |
| 380 | 0.564103 | 0.958974 | 0.893162 | 0.583095 |
| 381 | 0.564103 | 0.958974 | 0.893162 | 0.583095 |
| 382 | 0.564103 | 0.958974 | 0.893162 | 0.583095 |
| 383 | 0.564103 | 0.958974 | 0.893162 | 0.583095 |
| 384 | 0.564103 | 0.948718 | 0.884615 | 0.556243 |
| 385 | 0.564103 | 0.948718 | 0.884615 | 0.556243 |
| 386 | 0.564103 | 0.948718 | 0.884615 | 0.556243 |
| 387 | 0.564103 | 0.948718 | 0.884615 | 0.556243 |
| 388 | 0.564103 | 0.948718 | 0.884615 | 0.556243 |
| 389 | 0.564103 | 0.948718 | 0.884615 | 0.556243 |
| 390 | 0.564103 | 0.948718 | 0.884615 | 0.556243 |
| 391 | 0.589744 | 0.958974 | 0.897436 | 0.603212 |
| 392 | 0.589744 | 0.958974 | 0.897436 | 0.603212 |
| 393 | 0.589744 | 0.953846 | 0.893162 | 0.589617 |
| 394 | 0.589744 | 0.958974 | 0.897436 | 0.603212 |
| 395 | 0.589744 | 0.948718 | 0.888889 | 0.576566 |
| 396 | 0.589744 | 0.948718 | 0.888889 | 0.576566 |
| 397 | 0.589744 | 0.948718 | 0.888889 | 0.576566 |
| 398 | 0.589744 | 0.948718 | 0.888889 | 0.576566 |
| 399 | 0.589744 | 0.94359  | 0.884615 | 0.564019 |
| 400 | 0.589744 | 0.94359  | 0.884615 | 0.564019 |
| 401 | 0.589744 | 0.953846 | 0.893162 | 0.589617 |
| 402 | 0.589744 | 0.953846 | 0.893162 | 0.589617 |
| 403 | 0.589744 | 0.953846 | 0.893162 | 0.589617 |
| 404 | 0.589744 | 0.948718 | 0.888889 | 0.576566 |
| 405 | 0.589744 | 0.948718 | 0.888889 | 0.576566 |
| 406 | 0.589744 | 0.948718 | 0.888889 | 0.576566 |
| 407 | 0.589744 | 0.948718 | 0.888889 | 0.576566 |
| 408 | 0.589744 | 0.948718 | 0.888889 | 0.576566 |
| 409 | 0.589744 | 0.948718 | 0.888889 | 0.576566 |
| 410 | 0.589744 | 0.948718 | 0.888889 | 0.576566 |
| 411 | 0.589744 | 0.948718 | 0.888889 | 0.576566 |
| 412 | 0.589744 | 0.948718 | 0.888889 | 0.576566 |
| 413 | 0.589744 | 0.948718 | 0.888889 | 0.576566 |
| 414 | 0.589744 | 0.953846 | 0.893162 | 0.589617 |
| 415 | 0.589744 | 0.953846 | 0.893162 | 0.589617 |
| 416 | 0.589744 | 0.953846 | 0.893162 | 0.589617 |
| 417 | 0.589744 | 0.953846 | 0.893162 | 0.589617 |
| 418 | 0.589744 | 0.953846 | 0.893162 | 0.589617 |
| 419 | 0.589744 | 0.953846 | 0.893162 | 0.589617 |

|     |          |          |          |          |
|-----|----------|----------|----------|----------|
| 420 | 0.589744 | 0.953846 | 0.893162 | 0.589617 |
| 421 | 0.589744 | 0.953846 | 0.893162 | 0.589617 |
| 422 | 0.589744 | 0.953846 | 0.893162 | 0.589617 |
| 423 | 0.589744 | 0.953846 | 0.893162 | 0.589617 |
| 424 | 0.589744 | 0.953846 | 0.893162 | 0.589617 |
| 425 | 0.589744 | 0.953846 | 0.893162 | 0.589617 |
| 426 | 0.589744 | 0.953846 | 0.893162 | 0.589617 |
| 427 | 0.589744 | 0.953846 | 0.893162 | 0.589617 |
| 428 | 0.589744 | 0.953846 | 0.893162 | 0.589617 |
| 429 | 0.589744 | 0.953846 | 0.893162 | 0.589617 |
| 430 | 0.589744 | 0.953846 | 0.893162 | 0.589617 |
| 431 | 0.589744 | 0.953846 | 0.893162 | 0.589617 |
| 432 | 0.589744 | 0.953846 | 0.893162 | 0.589617 |
| 433 | 0.589744 | 0.958974 | 0.897436 | 0.603212 |
| 434 | 0.589744 | 0.958974 | 0.897436 | 0.603212 |
| 435 | 0.615385 | 0.958974 | 0.901709 | 0.622992 |
| 436 | 0.615385 | 0.953846 | 0.897436 | 0.609513 |
| 437 | 0.615385 | 0.953846 | 0.897436 | 0.609513 |
| 438 | 0.615385 | 0.953846 | 0.897436 | 0.609513 |
| 439 | 0.615385 | 0.953846 | 0.897436 | 0.609513 |
| 440 | 0.615385 | 0.953846 | 0.897436 | 0.609513 |
| 441 | 0.615385 | 0.953846 | 0.897436 | 0.609513 |
| 442 | 0.615385 | 0.953846 | 0.897436 | 0.609513 |
| 443 | 0.615385 | 0.953846 | 0.897436 | 0.609513 |
| 444 | 0.615385 | 0.953846 | 0.897436 | 0.609513 |
| 445 | 0.615385 | 0.953846 | 0.897436 | 0.609513 |
| 446 | 0.615385 | 0.953846 | 0.897436 | 0.609513 |
| 447 | 0.615385 | 0.953846 | 0.897436 | 0.609513 |
| 448 | 0.615385 | 0.953846 | 0.897436 | 0.609513 |
| 449 | 0.615385 | 0.953846 | 0.897436 | 0.609513 |
| 450 | 0.615385 | 0.953846 | 0.897436 | 0.609513 |
| 451 | 0.615385 | 0.953846 | 0.897436 | 0.609513 |
| 452 | 0.615385 | 0.953846 | 0.897436 | 0.609513 |
| 453 | 0.615385 | 0.953846 | 0.897436 | 0.609513 |
| 454 | 0.615385 | 0.953846 | 0.897436 | 0.609513 |
| 455 | 0.615385 | 0.953846 | 0.897436 | 0.609513 |
| 456 | 0.615385 | 0.953846 | 0.897436 | 0.609513 |
| 457 | 0.615385 | 0.953846 | 0.897436 | 0.609513 |
| 458 | 0.615385 | 0.953846 | 0.897436 | 0.609513 |
| 459 | 0.615385 | 0.953846 | 0.897436 | 0.609513 |
| 460 | 0.615385 | 0.953846 | 0.897436 | 0.609513 |
| 461 | 0.615385 | 0.953846 | 0.897436 | 0.609513 |
| 462 | 0.615385 | 0.953846 | 0.897436 | 0.609513 |



|     |          |          |          |          |
|-----|----------|----------|----------|----------|
| 463 | 0.615385 | 0.953846 | 0.897436 | 0.609513 |
| 464 | 0.615385 | 0.953846 | 0.897436 | 0.609513 |
| 465 | 0.615385 | 0.953846 | 0.897436 | 0.609513 |
| 466 | 0.615385 | 0.953846 | 0.897436 | 0.609513 |
| 467 | 0.615385 | 0.953846 | 0.897436 | 0.609513 |
| 468 | 0.615385 | 0.953846 | 0.897436 | 0.609513 |
| 469 | 0.615385 | 0.953846 | 0.897436 | 0.609513 |
| 470 | 0.615385 | 0.953846 | 0.897436 | 0.609513 |
| 471 | 0.615385 | 0.953846 | 0.897436 | 0.609513 |
| 472 | 0.615385 | 0.953846 | 0.897436 | 0.609513 |
| 473 | 0.615385 | 0.948718 | 0.893162 | 0.596559 |
| 474 | 0.615385 | 0.948718 | 0.893162 | 0.596559 |
| 475 | 0.615385 | 0.948718 | 0.893162 | 0.596559 |
| 476 | 0.615385 | 0.948718 | 0.893162 | 0.596559 |
| 477 | 0.615385 | 0.948718 | 0.893162 | 0.596559 |
| 478 | 0.615385 | 0.948718 | 0.893162 | 0.596559 |
| 479 | 0.615385 | 0.948718 | 0.893162 | 0.596559 |
| 480 | 0.615385 | 0.948718 | 0.893162 | 0.596559 |
| 481 | 0.615385 | 0.948718 | 0.893162 | 0.596559 |
| 482 | 0.615385 | 0.948718 | 0.893162 | 0.596559 |
| 483 | 0.615385 | 0.948718 | 0.893162 | 0.596559 |
| 484 | 0.615385 | 0.948718 | 0.893162 | 0.596559 |
| 485 | 0.615385 | 0.948718 | 0.893162 | 0.596559 |
| 486 | 0.615385 | 0.948718 | 0.893162 | 0.596559 |
| 487 | 0.589744 | 0.948718 | 0.888889 | 0.576566 |
| 488 | 0.589744 | 0.948718 | 0.888889 | 0.576566 |
| 489 | 0.589744 | 0.948718 | 0.888889 | 0.576566 |
| 490 | 0.589744 | 0.948718 | 0.888889 | 0.576566 |
| 491 | 0.589744 | 0.948718 | 0.888889 | 0.576566 |
| 492 | 0.589744 | 0.948718 | 0.888889 | 0.576566 |
| 493 | 0.589744 | 0.948718 | 0.888889 | 0.576566 |
| 494 | 0.589744 | 0.948718 | 0.888889 | 0.576566 |
| 495 | 0.615385 | 0.948718 | 0.893162 | 0.596559 |
| 496 | 0.615385 | 0.948718 | 0.893162 | 0.596559 |
| 497 | 0.615385 | 0.948718 | 0.893162 | 0.596559 |
| 498 | 0.615385 | 0.948718 | 0.893162 | 0.596559 |
| 499 | 0.615385 | 0.948718 | 0.893162 | 0.596559 |
| 500 | 0.615385 | 0.948718 | 0.893162 | 0.596559 |

(10)Dataset  $D_{10}$

| Number of features | SN       | SP       | ACC      | MCC      |
|--------------------|----------|----------|----------|----------|
| 4                  | 0.461538 | 0.989744 | 0.901709 | 0.601556 |

|    |          |          |          |          |
|----|----------|----------|----------|----------|
| 5  | 0.487179 | 0.989744 | 0.905983 | 0.621868 |
| 6  | 0.487179 | 0.989744 | 0.905983 | 0.621868 |
| 7  | 0.512821 | 0.989744 | 0.910256 | 0.641744 |
| 8  | 0.487179 | 0.989744 | 0.905983 | 0.621868 |
| 9  | 0.512821 | 0.989744 | 0.910256 | 0.641744 |
| 10 | 0.538462 | 0.989744 | 0.91453  | 0.661222 |
| 11 | 0.538462 | 0.989744 | 0.91453  | 0.661222 |
| 12 | 0.564103 | 0.989744 | 0.918803 | 0.680336 |
| 13 | 0.564103 | 0.989744 | 0.918803 | 0.680336 |
| 14 | 0.564103 | 0.989744 | 0.918803 | 0.680336 |
| 15 | 0.564103 | 0.989744 | 0.918803 | 0.680336 |
| 16 | 0.641026 | 0.989744 | 0.931624 | 0.735789 |
| 17 | 0.641026 | 0.989744 | 0.931624 | 0.735789 |
| 18 | 0.641026 | 0.989744 | 0.931624 | 0.735789 |
| 19 | 0.641026 | 0.989744 | 0.931624 | 0.735789 |
| 20 | 0.641026 | 0.994872 | 0.935897 | 0.754082 |
| 21 | 0.615385 | 0.994872 | 0.931624 | 0.736239 |
| 22 | 0.615385 | 0.989744 | 0.92735  | 0.717594 |
| 23 | 0.615385 | 0.989744 | 0.92735  | 0.717594 |
| 24 | 0.589744 | 0.989744 | 0.923077 | 0.699118 |
| 25 | 0.589744 | 0.989744 | 0.923077 | 0.699118 |
| 26 | 0.615385 | 0.994872 | 0.931624 | 0.736239 |
| 27 | 0.615385 | 0.989744 | 0.92735  | 0.717594 |
| 28 | 0.615385 | 0.989744 | 0.92735  | 0.717594 |
| 29 | 0.641026 | 0.989744 | 0.931624 | 0.735789 |
| 30 | 0.641026 | 0.984615 | 0.92735  | 0.718393 |
| 31 | 0.641026 | 0.979487 | 0.923077 | 0.701818 |
| 32 | 0.615385 | 0.984615 | 0.923077 | 0.699896 |
| 33 | 0.666667 | 0.984615 | 0.931624 | 0.736619 |
| 34 | 0.641026 | 0.979487 | 0.923077 | 0.701818 |
| 35 | 0.615385 | 0.979487 | 0.918803 | 0.683062 |
| 36 | 0.615385 | 0.984615 | 0.923077 | 0.699896 |
| 37 | 0.615385 | 0.984615 | 0.923077 | 0.699896 |
| 38 | 0.615385 | 0.979487 | 0.918803 | 0.683062 |
| 39 | 0.615385 | 0.984615 | 0.923077 | 0.699896 |
| 40 | 0.589744 | 0.974359 | 0.910256 | 0.647732 |
| 41 | 0.615385 | 0.979487 | 0.918803 | 0.683062 |
| 42 | 0.641026 | 0.979487 | 0.923077 | 0.701818 |
| 43 | 0.641026 | 0.979487 | 0.923077 | 0.701818 |
| 44 | 0.641026 | 0.984615 | 0.92735  | 0.718393 |
| 45 | 0.666667 | 0.979487 | 0.92735  | 0.720294 |
| 46 | 0.666667 | 0.979487 | 0.92735  | 0.720294 |
| 47 | 0.641026 | 0.974359 | 0.918803 | 0.685994 |

|    |          |          |          |          |
|----|----------|----------|----------|----------|
| 48 | 0.641026 | 0.984615 | 0.92735  | 0.718393 |
| 49 | 0.692308 | 0.984615 | 0.935897 | 0.754594 |
| 50 | 0.666667 | 0.984615 | 0.931624 | 0.736619 |
| 51 | 0.692308 | 0.984615 | 0.935897 | 0.754594 |
| 52 | 0.692308 | 0.984615 | 0.935897 | 0.754594 |
| 53 | 0.692308 | 0.984615 | 0.935897 | 0.754594 |
| 54 | 0.666667 | 0.984615 | 0.931624 | 0.736619 |
| 55 | 0.692308 | 0.984615 | 0.935897 | 0.754594 |
| 56 | 0.692308 | 0.984615 | 0.935897 | 0.754594 |
| 57 | 0.666667 | 0.989744 | 0.935897 | 0.753724 |
| 58 | 0.666667 | 0.989744 | 0.935897 | 0.753724 |
| 59 | 0.666667 | 0.989744 | 0.935897 | 0.753724 |
| 60 | 0.666667 | 0.989744 | 0.935897 | 0.753724 |
| 61 | 0.666667 | 0.989744 | 0.935897 | 0.753724 |
| 62 | 0.666667 | 0.989744 | 0.935897 | 0.753724 |
| 63 | 0.666667 | 0.984615 | 0.931624 | 0.736619 |
| 64 | 0.692308 | 0.989744 | 0.940171 | 0.77142  |
| 65 | 0.666667 | 0.989744 | 0.935897 | 0.753724 |
| 66 | 0.666667 | 0.989744 | 0.935897 | 0.753724 |
| 67 | 0.717949 | 0.989744 | 0.944444 | 0.788893 |
| 68 | 0.717949 | 0.989744 | 0.944444 | 0.788893 |
| 69 | 0.717949 | 0.989744 | 0.944444 | 0.788893 |
| 70 | 0.74359  | 0.989744 | 0.948718 | 0.806162 |
| 71 | 0.74359  | 0.989744 | 0.948718 | 0.806162 |
| 72 | 0.74359  | 0.989744 | 0.948718 | 0.806162 |
| 73 | 0.717949 | 0.989744 | 0.944444 | 0.788893 |
| 74 | 0.717949 | 0.989744 | 0.944444 | 0.788893 |
| 75 | 0.717949 | 0.989744 | 0.944444 | 0.788893 |
| 76 | 0.717949 | 0.989744 | 0.944444 | 0.788893 |
| 77 | 0.717949 | 0.989744 | 0.944444 | 0.788893 |
| 78 | 0.717949 | 0.989744 | 0.944444 | 0.788893 |
| 79 | 0.717949 | 0.989744 | 0.944444 | 0.788893 |
| 80 | 0.717949 | 0.989744 | 0.944444 | 0.788893 |
| 81 | 0.717949 | 0.989744 | 0.944444 | 0.788893 |
| 82 | 0.717949 | 0.989744 | 0.944444 | 0.788893 |
| 83 | 0.717949 | 0.989744 | 0.944444 | 0.788893 |
| 84 | 0.717949 | 0.989744 | 0.944444 | 0.788893 |
| 85 | 0.717949 | 0.989744 | 0.944444 | 0.788893 |
| 86 | 0.717949 | 0.984615 | 0.940171 | 0.772337 |
| 87 | 0.74359  | 0.989744 | 0.948718 | 0.806162 |
| 88 | 0.74359  | 0.979487 | 0.940171 | 0.774246 |
| 89 | 0.74359  | 0.979487 | 0.940171 | 0.774246 |
| 90 | 0.74359  | 0.984615 | 0.944444 | 0.789865 |

|     |          |          |          |          |
|-----|----------|----------|----------|----------|
| 91  | 0.74359  | 0.984615 | 0.944444 | 0.789865 |
| 92  | 0.74359  | 0.984615 | 0.944444 | 0.789865 |
| 93  | 0.74359  | 0.984615 | 0.944444 | 0.789865 |
| 94  | 0.74359  | 0.984615 | 0.944444 | 0.789865 |
| 95  | 0.74359  | 0.984615 | 0.944444 | 0.789865 |
| 96  | 0.74359  | 0.984615 | 0.944444 | 0.789865 |
| 97  | 0.717949 | 0.984615 | 0.940171 | 0.772337 |
| 98  | 0.74359  | 0.984615 | 0.944444 | 0.789865 |
| 99  | 0.692308 | 0.979487 | 0.931624 | 0.738512 |
| 100 | 0.692308 | 0.979487 | 0.931624 | 0.738512 |
| 101 | 0.692308 | 0.979487 | 0.931624 | 0.738512 |
| 102 | 0.692308 | 0.979487 | 0.931624 | 0.738512 |
| 103 | 0.717949 | 0.979487 | 0.935897 | 0.75649  |
| 104 | 0.717949 | 0.979487 | 0.935897 | 0.75649  |
| 105 | 0.717949 | 0.979487 | 0.935897 | 0.75649  |
| 106 | 0.717949 | 0.979487 | 0.935897 | 0.75649  |
| 107 | 0.717949 | 0.979487 | 0.935897 | 0.75649  |
| 108 | 0.717949 | 0.979487 | 0.935897 | 0.75649  |
| 109 | 0.692308 | 0.979487 | 0.931624 | 0.738512 |
| 110 | 0.717949 | 0.979487 | 0.935897 | 0.75649  |
| 111 | 0.717949 | 0.979487 | 0.935897 | 0.75649  |
| 112 | 0.717949 | 0.979487 | 0.935897 | 0.75649  |
| 113 | 0.717949 | 0.979487 | 0.935897 | 0.75649  |
| 114 | 0.717949 | 0.979487 | 0.935897 | 0.75649  |
| 115 | 0.717949 | 0.979487 | 0.935897 | 0.75649  |
| 116 | 0.717949 | 0.979487 | 0.935897 | 0.75649  |
| 117 | 0.717949 | 0.979487 | 0.935897 | 0.75649  |
| 118 | 0.717949 | 0.979487 | 0.935897 | 0.75649  |
| 119 | 0.717949 | 0.979487 | 0.935897 | 0.75649  |
| 120 | 0.717949 | 0.979487 | 0.935897 | 0.75649  |
| 121 | 0.717949 | 0.979487 | 0.935897 | 0.75649  |
| 122 | 0.717949 | 0.979487 | 0.935897 | 0.75649  |
| 123 | 0.717949 | 0.979487 | 0.935897 | 0.75649  |
| 124 | 0.717949 | 0.979487 | 0.935897 | 0.75649  |
| 125 | 0.717949 | 0.979487 | 0.935897 | 0.75649  |
| 126 | 0.717949 | 0.979487 | 0.935897 | 0.75649  |
| 127 | 0.717949 | 0.979487 | 0.935897 | 0.75649  |
| 128 | 0.717949 | 0.974359 | 0.931624 | 0.7413   |
| 129 | 0.692308 | 0.979487 | 0.931624 | 0.738512 |
| 130 | 0.692308 | 0.979487 | 0.931624 | 0.738512 |
| 131 | 0.692308 | 0.979487 | 0.931624 | 0.738512 |
| 132 | 0.666667 | 0.979487 | 0.92735  | 0.720294 |
| 133 | 0.692308 | 0.979487 | 0.931624 | 0.738512 |

|     |          |          |          |          |
|-----|----------|----------|----------|----------|
| 134 | 0.692308 | 0.984615 | 0.935897 | 0.754594 |
| 135 | 0.666667 | 0.984615 | 0.931624 | 0.736619 |
| 136 | 0.666667 | 0.984615 | 0.931624 | 0.736619 |
| 137 | 0.666667 | 0.979487 | 0.92735  | 0.720294 |
| 138 | 0.641026 | 0.984615 | 0.92735  | 0.718393 |
| 139 | 0.615385 | 0.979487 | 0.918803 | 0.683062 |
| 140 | 0.641026 | 0.979487 | 0.923077 | 0.701818 |
| 141 | 0.641026 | 0.979487 | 0.923077 | 0.701818 |
| 142 | 0.641026 | 0.979487 | 0.923077 | 0.701818 |
| 143 | 0.666667 | 0.979487 | 0.92735  | 0.720294 |
| 144 | 0.641026 | 0.979487 | 0.923077 | 0.701818 |
| 145 | 0.641026 | 0.979487 | 0.923077 | 0.701818 |
| 146 | 0.666667 | 0.979487 | 0.92735  | 0.720294 |
| 147 | 0.666667 | 0.979487 | 0.92735  | 0.720294 |
| 148 | 0.641026 | 0.979487 | 0.923077 | 0.701818 |
| 149 | 0.641026 | 0.979487 | 0.923077 | 0.701818 |
| 150 | 0.641026 | 0.979487 | 0.923077 | 0.701818 |
| 151 | 0.641026 | 0.979487 | 0.923077 | 0.701818 |
| 152 | 0.641026 | 0.979487 | 0.923077 | 0.701818 |
| 153 | 0.641026 | 0.979487 | 0.923077 | 0.701818 |
| 154 | 0.641026 | 0.979487 | 0.923077 | 0.701818 |
| 155 | 0.641026 | 0.979487 | 0.923077 | 0.701818 |
| 156 | 0.641026 | 0.979487 | 0.923077 | 0.701818 |
| 157 | 0.641026 | 0.979487 | 0.923077 | 0.701818 |
| 158 | 0.641026 | 0.979487 | 0.923077 | 0.701818 |
| 159 | 0.641026 | 0.979487 | 0.923077 | 0.701818 |
| 160 | 0.641026 | 0.979487 | 0.923077 | 0.701818 |
| 161 | 0.641026 | 0.974359 | 0.918803 | 0.685994 |
| 162 | 0.641026 | 0.974359 | 0.918803 | 0.685994 |
| 163 | 0.641026 | 0.974359 | 0.918803 | 0.685994 |
| 164 | 0.641026 | 0.974359 | 0.918803 | 0.685994 |
| 165 | 0.641026 | 0.974359 | 0.918803 | 0.685994 |
| 166 | 0.641026 | 0.979487 | 0.923077 | 0.701818 |
| 167 | 0.641026 | 0.979487 | 0.923077 | 0.701818 |
| 168 | 0.641026 | 0.984615 | 0.92735  | 0.718393 |
| 169 | 0.641026 | 0.984615 | 0.92735  | 0.718393 |
| 170 | 0.641026 | 0.984615 | 0.92735  | 0.718393 |
| 171 | 0.641026 | 0.984615 | 0.92735  | 0.718393 |
| 172 | 0.641026 | 0.979487 | 0.923077 | 0.701818 |
| 173 | 0.641026 | 0.979487 | 0.923077 | 0.701818 |
| 174 | 0.641026 | 0.984615 | 0.92735  | 0.718393 |
| 175 | 0.641026 | 0.984615 | 0.92735  | 0.718393 |
| 176 | 0.641026 | 0.984615 | 0.92735  | 0.718393 |

|     |          |          |          |          |
|-----|----------|----------|----------|----------|
| 177 | 0.641026 | 0.984615 | 0.92735  | 0.718393 |
| 178 | 0.615385 | 0.979487 | 0.918803 | 0.683062 |
| 179 | 0.615385 | 0.979487 | 0.918803 | 0.683062 |
| 180 | 0.615385 | 0.979487 | 0.918803 | 0.683062 |
| 181 | 0.589744 | 0.979487 | 0.91453  | 0.664004 |
| 182 | 0.589744 | 0.979487 | 0.91453  | 0.664004 |
| 183 | 0.589744 | 0.979487 | 0.91453  | 0.664004 |
| 184 | 0.589744 | 0.979487 | 0.91453  | 0.664004 |
| 185 | 0.589744 | 0.974359 | 0.910256 | 0.647732 |
| 186 | 0.589744 | 0.979487 | 0.91453  | 0.664004 |
| 187 | 0.589744 | 0.979487 | 0.91453  | 0.664004 |
| 188 | 0.589744 | 0.974359 | 0.910256 | 0.647732 |
| 189 | 0.589744 | 0.974359 | 0.910256 | 0.647732 |
| 190 | 0.589744 | 0.974359 | 0.910256 | 0.647732 |
| 191 | 0.589744 | 0.974359 | 0.910256 | 0.647732 |
| 192 | 0.589744 | 0.974359 | 0.910256 | 0.647732 |
| 193 | 0.589744 | 0.974359 | 0.910256 | 0.647732 |
| 194 | 0.589744 | 0.974359 | 0.910256 | 0.647732 |
| 195 | 0.589744 | 0.974359 | 0.910256 | 0.647732 |
| 196 | 0.589744 | 0.974359 | 0.910256 | 0.647732 |
| 197 | 0.589744 | 0.974359 | 0.910256 | 0.647732 |
| 198 | 0.589744 | 0.974359 | 0.910256 | 0.647732 |
| 199 | 0.589744 | 0.974359 | 0.910256 | 0.647732 |
| 200 | 0.589744 | 0.974359 | 0.910256 | 0.647732 |
| 201 | 0.589744 | 0.974359 | 0.910256 | 0.647732 |
| 202 | 0.589744 | 0.974359 | 0.910256 | 0.647732 |
| 203 | 0.589744 | 0.979487 | 0.91453  | 0.664004 |
| 204 | 0.589744 | 0.979487 | 0.91453  | 0.664004 |
| 205 | 0.589744 | 0.979487 | 0.91453  | 0.664004 |
| 206 | 0.589744 | 0.974359 | 0.910256 | 0.647732 |
| 207 | 0.589744 | 0.974359 | 0.910256 | 0.647732 |
| 208 | 0.589744 | 0.974359 | 0.910256 | 0.647732 |
| 209 | 0.589744 | 0.974359 | 0.910256 | 0.647732 |
| 210 | 0.589744 | 0.974359 | 0.910256 | 0.647732 |
| 211 | 0.589744 | 0.974359 | 0.910256 | 0.647732 |
| 212 | 0.589744 | 0.974359 | 0.910256 | 0.647732 |
| 213 | 0.589744 | 0.974359 | 0.910256 | 0.647732 |
| 214 | 0.589744 | 0.974359 | 0.910256 | 0.647732 |
| 215 | 0.589744 | 0.974359 | 0.910256 | 0.647732 |
| 216 | 0.589744 | 0.974359 | 0.910256 | 0.647732 |
| 217 | 0.589744 | 0.974359 | 0.910256 | 0.647732 |
| 218 | 0.589744 | 0.974359 | 0.910256 | 0.647732 |
| 219 | 0.589744 | 0.974359 | 0.910256 | 0.647732 |

|     |          |          |          |          |
|-----|----------|----------|----------|----------|
| 220 | 0.589744 | 0.974359 | 0.910256 | 0.647732 |
| 221 | 0.589744 | 0.969231 | 0.905983 | 0.632216 |
| 222 | 0.589744 | 0.974359 | 0.910256 | 0.647732 |
| 223 | 0.589744 | 0.969231 | 0.905983 | 0.632216 |
| 224 | 0.589744 | 0.969231 | 0.905983 | 0.632216 |
| 225 | 0.615385 | 0.974359 | 0.91453  | 0.667017 |
| 226 | 0.615385 | 0.974359 | 0.91453  | 0.667017 |
| 227 | 0.615385 | 0.974359 | 0.91453  | 0.667017 |
| 228 | 0.615385 | 0.969231 | 0.910256 | 0.651695 |
| 229 | 0.615385 | 0.969231 | 0.910256 | 0.651695 |
| 230 | 0.615385 | 0.969231 | 0.910256 | 0.651695 |
| 231 | 0.615385 | 0.969231 | 0.910256 | 0.651695 |
| 232 | 0.615385 | 0.969231 | 0.910256 | 0.651695 |
| 233 | 0.615385 | 0.969231 | 0.910256 | 0.651695 |
| 234 | 0.641026 | 0.969231 | 0.91453  | 0.670862 |
| 235 | 0.615385 | 0.969231 | 0.910256 | 0.651695 |
| 236 | 0.615385 | 0.969231 | 0.910256 | 0.651695 |
| 237 | 0.564103 | 0.969231 | 0.901709 | 0.612401 |
| 238 | 0.589744 | 0.969231 | 0.905983 | 0.632216 |
| 239 | 0.589744 | 0.969231 | 0.905983 | 0.632216 |
| 240 | 0.589744 | 0.974359 | 0.910256 | 0.647732 |
| 241 | 0.589744 | 0.969231 | 0.905983 | 0.632216 |
| 242 | 0.589744 | 0.969231 | 0.905983 | 0.632216 |
| 243 | 0.589744 | 0.969231 | 0.905983 | 0.632216 |
| 244 | 0.564103 | 0.964103 | 0.897436 | 0.597415 |
| 245 | 0.564103 | 0.964103 | 0.897436 | 0.597415 |
| 246 | 0.564103 | 0.964103 | 0.897436 | 0.597415 |
| 247 | 0.564103 | 0.974359 | 0.905983 | 0.628112 |
| 248 | 0.564103 | 0.974359 | 0.905983 | 0.628112 |
| 249 | 0.564103 | 0.974359 | 0.905983 | 0.628112 |
| 250 | 0.589744 | 0.974359 | 0.910256 | 0.647732 |
| 251 | 0.589744 | 0.974359 | 0.910256 | 0.647732 |
| 252 | 0.564103 | 0.974359 | 0.905983 | 0.628112 |
| 253 | 0.589744 | 0.974359 | 0.910256 | 0.647732 |
| 254 | 0.589744 | 0.974359 | 0.910256 | 0.647732 |
| 255 | 0.589744 | 0.974359 | 0.910256 | 0.647732 |
| 256 | 0.538462 | 0.969231 | 0.897436 | 0.59222  |
| 257 | 0.538462 | 0.969231 | 0.897436 | 0.59222  |
| 258 | 0.538462 | 0.969231 | 0.897436 | 0.59222  |
| 259 | 0.538462 | 0.969231 | 0.897436 | 0.59222  |
| 260 | 0.564103 | 0.969231 | 0.901709 | 0.612401 |
| 261 | 0.564103 | 0.969231 | 0.901709 | 0.612401 |
| 262 | 0.564103 | 0.974359 | 0.905983 | 0.628112 |

|     |          |          |          |          |
|-----|----------|----------|----------|----------|
| 263 | 0.589744 | 0.969231 | 0.905983 | 0.632216 |
| 264 | 0.589744 | 0.964103 | 0.901709 | 0.617395 |
| 265 | 0.564103 | 0.964103 | 0.897436 | 0.597415 |
| 266 | 0.564103 | 0.964103 | 0.897436 | 0.597415 |
| 267 | 0.564103 | 0.964103 | 0.897436 | 0.597415 |
| 268 | 0.589744 | 0.964103 | 0.901709 | 0.617395 |
| 269 | 0.564103 | 0.964103 | 0.897436 | 0.597415 |
| 270 | 0.564103 | 0.964103 | 0.897436 | 0.597415 |
| 271 | 0.589744 | 0.964103 | 0.901709 | 0.617395 |
| 272 | 0.589744 | 0.964103 | 0.901709 | 0.617395 |
| 273 | 0.589744 | 0.964103 | 0.901709 | 0.617395 |
| 274 | 0.589744 | 0.964103 | 0.901709 | 0.617395 |
| 275 | 0.564103 | 0.964103 | 0.897436 | 0.597415 |
| 276 | 0.589744 | 0.969231 | 0.905983 | 0.632216 |
| 277 | 0.589744 | 0.969231 | 0.905983 | 0.632216 |
| 278 | 0.615385 | 0.969231 | 0.910256 | 0.651695 |
| 279 | 0.615385 | 0.969231 | 0.910256 | 0.651695 |
| 280 | 0.615385 | 0.969231 | 0.910256 | 0.651695 |
| 281 | 0.615385 | 0.969231 | 0.910256 | 0.651695 |
| 282 | 0.615385 | 0.969231 | 0.910256 | 0.651695 |
| 283 | 0.615385 | 0.969231 | 0.910256 | 0.651695 |
| 284 | 0.615385 | 0.969231 | 0.910256 | 0.651695 |
| 285 | 0.615385 | 0.969231 | 0.910256 | 0.651695 |
| 286 | 0.615385 | 0.969231 | 0.910256 | 0.651695 |
| 287 | 0.615385 | 0.969231 | 0.910256 | 0.651695 |
| 288 | 0.615385 | 0.969231 | 0.910256 | 0.651695 |
| 289 | 0.615385 | 0.969231 | 0.910256 | 0.651695 |
| 290 | 0.615385 | 0.969231 | 0.910256 | 0.651695 |
| 291 | 0.615385 | 0.969231 | 0.910256 | 0.651695 |
| 292 | 0.615385 | 0.969231 | 0.910256 | 0.651695 |
| 293 | 0.615385 | 0.969231 | 0.910256 | 0.651695 |
| 294 | 0.615385 | 0.969231 | 0.910256 | 0.651695 |
| 295 | 0.615385 | 0.969231 | 0.910256 | 0.651695 |
| 296 | 0.589744 | 0.969231 | 0.905983 | 0.632216 |
| 297 | 0.589744 | 0.969231 | 0.905983 | 0.632216 |
| 298 | 0.589744 | 0.969231 | 0.905983 | 0.632216 |
| 299 | 0.589744 | 0.969231 | 0.905983 | 0.632216 |
| 300 | 0.615385 | 0.969231 | 0.910256 | 0.651695 |
| 301 | 0.589744 | 0.969231 | 0.905983 | 0.632216 |
| 302 | 0.589744 | 0.969231 | 0.905983 | 0.632216 |
| 303 | 0.589744 | 0.969231 | 0.905983 | 0.632216 |
| 304 | 0.589744 | 0.969231 | 0.905983 | 0.632216 |
| 305 | 0.589744 | 0.969231 | 0.905983 | 0.632216 |



|     |          |          |          |          |
|-----|----------|----------|----------|----------|
| 306 | 0.589744 | 0.969231 | 0.905983 | 0.632216 |
| 307 | 0.589744 | 0.969231 | 0.905983 | 0.632216 |
| 308 | 0.589744 | 0.969231 | 0.905983 | 0.632216 |
| 309 | 0.589744 | 0.969231 | 0.905983 | 0.632216 |
| 310 | 0.589744 | 0.969231 | 0.905983 | 0.632216 |
| 311 | 0.589744 | 0.969231 | 0.905983 | 0.632216 |
| 312 | 0.589744 | 0.969231 | 0.905983 | 0.632216 |
| 313 | 0.589744 | 0.969231 | 0.905983 | 0.632216 |
| 314 | 0.589744 | 0.969231 | 0.905983 | 0.632216 |
| 315 | 0.589744 | 0.969231 | 0.905983 | 0.632216 |
| 316 | 0.589744 | 0.969231 | 0.905983 | 0.632216 |
| 317 | 0.589744 | 0.969231 | 0.905983 | 0.632216 |
| 318 | 0.589744 | 0.969231 | 0.905983 | 0.632216 |
| 319 | 0.589744 | 0.969231 | 0.905983 | 0.632216 |
| 320 | 0.615385 | 0.969231 | 0.910256 | 0.651695 |
| 321 | 0.615385 | 0.969231 | 0.910256 | 0.651695 |
| 322 | 0.615385 | 0.969231 | 0.910256 | 0.651695 |
| 323 | 0.615385 | 0.969231 | 0.910256 | 0.651695 |
| 324 | 0.615385 | 0.969231 | 0.910256 | 0.651695 |
| 325 | 0.615385 | 0.969231 | 0.910256 | 0.651695 |
| 326 | 0.615385 | 0.969231 | 0.910256 | 0.651695 |
| 327 | 0.615385 | 0.969231 | 0.910256 | 0.651695 |
| 328 | 0.641026 | 0.969231 | 0.91453  | 0.670862 |
| 329 | 0.641026 | 0.969231 | 0.91453  | 0.670862 |
| 330 | 0.641026 | 0.969231 | 0.91453  | 0.670862 |
| 331 | 0.666667 | 0.969231 | 0.918803 | 0.689741 |
| 332 | 0.666667 | 0.969231 | 0.918803 | 0.689741 |
| 333 | 0.666667 | 0.969231 | 0.918803 | 0.689741 |
| 334 | 0.666667 | 0.969231 | 0.918803 | 0.689741 |
| 335 | 0.666667 | 0.969231 | 0.918803 | 0.689741 |
| 336 | 0.666667 | 0.969231 | 0.918803 | 0.689741 |
| 337 | 0.666667 | 0.969231 | 0.918803 | 0.689741 |
| 338 | 0.666667 | 0.969231 | 0.918803 | 0.689741 |
| 339 | 0.666667 | 0.969231 | 0.918803 | 0.689741 |
| 340 | 0.666667 | 0.969231 | 0.918803 | 0.689741 |
| 341 | 0.666667 | 0.969231 | 0.918803 | 0.689741 |
| 342 | 0.666667 | 0.969231 | 0.918803 | 0.689741 |
| 343 | 0.641026 | 0.969231 | 0.91453  | 0.670862 |
| 344 | 0.666667 | 0.969231 | 0.918803 | 0.689741 |
| 345 | 0.666667 | 0.969231 | 0.918803 | 0.689741 |
| 346 | 0.666667 | 0.969231 | 0.918803 | 0.689741 |
| 347 | 0.666667 | 0.969231 | 0.918803 | 0.689741 |
| 348 | 0.666667 | 0.969231 | 0.918803 | 0.689741 |

|     |          |          |          |          |
|-----|----------|----------|----------|----------|
| 349 | 0.666667 | 0.969231 | 0.918803 | 0.689741 |
| 350 | 0.666667 | 0.969231 | 0.918803 | 0.689741 |
| 351 | 0.666667 | 0.969231 | 0.918803 | 0.689741 |
| 352 | 0.666667 | 0.969231 | 0.918803 | 0.689741 |
| 353 | 0.666667 | 0.969231 | 0.918803 | 0.689741 |
| 354 | 0.666667 | 0.969231 | 0.918803 | 0.689741 |
| 355 | 0.666667 | 0.969231 | 0.918803 | 0.689741 |
| 356 | 0.666667 | 0.964103 | 0.91453  | 0.675406 |
| 357 | 0.666667 | 0.964103 | 0.91453  | 0.675406 |
| 358 | 0.666667 | 0.964103 | 0.91453  | 0.675406 |
| 359 | 0.666667 | 0.969231 | 0.918803 | 0.689741 |
| 360 | 0.666667 | 0.969231 | 0.918803 | 0.689741 |
| 361 | 0.666667 | 0.964103 | 0.91453  | 0.675406 |
| 362 | 0.666667 | 0.964103 | 0.91453  | 0.675406 |
| 363 | 0.666667 | 0.969231 | 0.918803 | 0.689741 |
| 364 | 0.666667 | 0.964103 | 0.91453  | 0.675406 |
| 365 | 0.641026 | 0.964103 | 0.910256 | 0.656366 |
| 366 | 0.641026 | 0.964103 | 0.910256 | 0.656366 |
| 367 | 0.641026 | 0.964103 | 0.910256 | 0.656366 |
| 368 | 0.641026 | 0.964103 | 0.910256 | 0.656366 |
| 369 | 0.641026 | 0.964103 | 0.910256 | 0.656366 |
| 370 | 0.641026 | 0.964103 | 0.910256 | 0.656366 |
| 371 | 0.641026 | 0.964103 | 0.910256 | 0.656366 |
| 372 | 0.641026 | 0.964103 | 0.910256 | 0.656366 |
| 373 | 0.641026 | 0.964103 | 0.910256 | 0.656366 |
| 374 | 0.641026 | 0.964103 | 0.910256 | 0.656366 |
| 375 | 0.666667 | 0.964103 | 0.91453  | 0.675406 |
| 376 | 0.666667 | 0.958974 | 0.910256 | 0.661638 |
| 377 | 0.641026 | 0.964103 | 0.910256 | 0.656366 |
| 378 | 0.641026 | 0.958974 | 0.905983 | 0.64246  |
| 379 | 0.641026 | 0.969231 | 0.91453  | 0.670862 |
| 380 | 0.641026 | 0.964103 | 0.910256 | 0.656366 |
| 381 | 0.641026 | 0.964103 | 0.910256 | 0.656366 |
| 382 | 0.641026 | 0.964103 | 0.910256 | 0.656366 |
| 383 | 0.641026 | 0.964103 | 0.910256 | 0.656366 |
| 384 | 0.641026 | 0.964103 | 0.910256 | 0.656366 |
| 385 | 0.641026 | 0.964103 | 0.910256 | 0.656366 |
| 386 | 0.666667 | 0.974359 | 0.923077 | 0.704687 |
| 387 | 0.666667 | 0.974359 | 0.923077 | 0.704687 |
| 388 | 0.666667 | 0.964103 | 0.91453  | 0.675406 |
| 389 | 0.666667 | 0.964103 | 0.91453  | 0.675406 |
| 390 | 0.666667 | 0.964103 | 0.91453  | 0.675406 |
| 391 | 0.666667 | 0.969231 | 0.918803 | 0.689741 |

|     |          |          |          |          |
|-----|----------|----------|----------|----------|
| 392 | 0.666667 | 0.969231 | 0.918803 | 0.689741 |
| 393 | 0.666667 | 0.969231 | 0.918803 | 0.689741 |
| 394 | 0.666667 | 0.969231 | 0.918803 | 0.689741 |
| 395 | 0.666667 | 0.969231 | 0.918803 | 0.689741 |
| 396 | 0.666667 | 0.964103 | 0.91453  | 0.675406 |
| 397 | 0.666667 | 0.964103 | 0.91453  | 0.675406 |
| 398 | 0.666667 | 0.964103 | 0.91453  | 0.675406 |
| 399 | 0.666667 | 0.969231 | 0.918803 | 0.689741 |
| 400 | 0.666667 | 0.969231 | 0.918803 | 0.689741 |
| 401 | 0.666667 | 0.969231 | 0.918803 | 0.689741 |
| 402 | 0.666667 | 0.969231 | 0.918803 | 0.689741 |
| 403 | 0.666667 | 0.969231 | 0.918803 | 0.689741 |
| 404 | 0.666667 | 0.969231 | 0.918803 | 0.689741 |
| 405 | 0.666667 | 0.969231 | 0.918803 | 0.689741 |
| 406 | 0.666667 | 0.969231 | 0.918803 | 0.689741 |
| 407 | 0.666667 | 0.969231 | 0.918803 | 0.689741 |
| 408 | 0.666667 | 0.969231 | 0.918803 | 0.689741 |
| 409 | 0.666667 | 0.974359 | 0.923077 | 0.704687 |
| 410 | 0.666667 | 0.974359 | 0.923077 | 0.704687 |
| 411 | 0.666667 | 0.974359 | 0.923077 | 0.704687 |
| 412 | 0.666667 | 0.974359 | 0.923077 | 0.704687 |
| 413 | 0.666667 | 0.974359 | 0.923077 | 0.704687 |
| 414 | 0.666667 | 0.974359 | 0.923077 | 0.704687 |
| 415 | 0.666667 | 0.974359 | 0.923077 | 0.704687 |
| 416 | 0.666667 | 0.974359 | 0.923077 | 0.704687 |
| 417 | 0.666667 | 0.974359 | 0.923077 | 0.704687 |
| 418 | 0.666667 | 0.974359 | 0.923077 | 0.704687 |
| 419 | 0.666667 | 0.974359 | 0.923077 | 0.704687 |
| 420 | 0.666667 | 0.974359 | 0.923077 | 0.704687 |
| 421 | 0.666667 | 0.974359 | 0.923077 | 0.704687 |
| 422 | 0.666667 | 0.969231 | 0.918803 | 0.689741 |
| 423 | 0.666667 | 0.969231 | 0.918803 | 0.689741 |
| 424 | 0.666667 | 0.969231 | 0.918803 | 0.689741 |
| 425 | 0.666667 | 0.969231 | 0.918803 | 0.689741 |
| 426 | 0.666667 | 0.969231 | 0.918803 | 0.689741 |
| 427 | 0.666667 | 0.969231 | 0.918803 | 0.689741 |
| 428 | 0.666667 | 0.969231 | 0.918803 | 0.689741 |
| 429 | 0.666667 | 0.969231 | 0.918803 | 0.689741 |
| 430 | 0.666667 | 0.969231 | 0.918803 | 0.689741 |
| 431 | 0.666667 | 0.969231 | 0.918803 | 0.689741 |
| 432 | 0.666667 | 0.969231 | 0.918803 | 0.689741 |
| 433 | 0.666667 | 0.974359 | 0.923077 | 0.704687 |
| 434 | 0.666667 | 0.969231 | 0.918803 | 0.689741 |

|     |          |          |          |          |
|-----|----------|----------|----------|----------|
| 435 | 0.666667 | 0.969231 | 0.918803 | 0.689741 |
| 436 | 0.666667 | 0.969231 | 0.918803 | 0.689741 |
| 437 | 0.666667 | 0.969231 | 0.918803 | 0.689741 |
| 438 | 0.666667 | 0.969231 | 0.918803 | 0.689741 |
| 439 | 0.666667 | 0.969231 | 0.918803 | 0.689741 |
| 440 | 0.666667 | 0.969231 | 0.918803 | 0.689741 |
| 441 | 0.666667 | 0.969231 | 0.918803 | 0.689741 |
| 442 | 0.666667 | 0.969231 | 0.918803 | 0.689741 |
| 443 | 0.666667 | 0.969231 | 0.918803 | 0.689741 |
| 444 | 0.666667 | 0.969231 | 0.918803 | 0.689741 |
| 445 | 0.666667 | 0.969231 | 0.918803 | 0.689741 |
| 446 | 0.666667 | 0.969231 | 0.918803 | 0.689741 |
| 447 | 0.666667 | 0.969231 | 0.918803 | 0.689741 |
| 448 | 0.666667 | 0.969231 | 0.918803 | 0.689741 |
| 449 | 0.666667 | 0.969231 | 0.918803 | 0.689741 |
| 450 | 0.666667 | 0.969231 | 0.918803 | 0.689741 |
| 451 | 0.666667 | 0.969231 | 0.918803 | 0.689741 |
| 452 | 0.666667 | 0.969231 | 0.918803 | 0.689741 |
| 453 | 0.641026 | 0.969231 | 0.91453  | 0.670862 |
| 454 | 0.641026 | 0.969231 | 0.91453  | 0.670862 |
| 455 | 0.641026 | 0.969231 | 0.91453  | 0.670862 |
| 456 | 0.641026 | 0.969231 | 0.91453  | 0.670862 |
| 457 | 0.641026 | 0.969231 | 0.91453  | 0.670862 |
| 458 | 0.641026 | 0.969231 | 0.91453  | 0.670862 |
| 459 | 0.666667 | 0.969231 | 0.918803 | 0.689741 |
| 460 | 0.666667 | 0.969231 | 0.918803 | 0.689741 |
| 461 | 0.666667 | 0.969231 | 0.918803 | 0.689741 |
| 462 | 0.641026 | 0.969231 | 0.91453  | 0.670862 |
| 463 | 0.666667 | 0.969231 | 0.918803 | 0.689741 |
| 464 | 0.666667 | 0.969231 | 0.918803 | 0.689741 |
| 465 | 0.666667 | 0.969231 | 0.918803 | 0.689741 |
| 466 | 0.666667 | 0.969231 | 0.918803 | 0.689741 |
| 467 | 0.666667 | 0.969231 | 0.918803 | 0.689741 |
| 468 | 0.666667 | 0.969231 | 0.918803 | 0.689741 |
| 469 | 0.666667 | 0.969231 | 0.918803 | 0.689741 |
| 470 | 0.666667 | 0.969231 | 0.918803 | 0.689741 |
| 471 | 0.641026 | 0.969231 | 0.91453  | 0.670862 |
| 472 | 0.641026 | 0.969231 | 0.91453  | 0.670862 |
| 473 | 0.641026 | 0.969231 | 0.91453  | 0.670862 |
| 474 | 0.641026 | 0.969231 | 0.91453  | 0.670862 |
| 475 | 0.641026 | 0.969231 | 0.91453  | 0.670862 |
| 476 | 0.641026 | 0.969231 | 0.91453  | 0.670862 |
| 477 | 0.641026 | 0.969231 | 0.91453  | 0.670862 |

|     |          |          |          |          |
|-----|----------|----------|----------|----------|
| 478 | 0.641026 | 0.969231 | 0.91453  | 0.670862 |
| 479 | 0.641026 | 0.969231 | 0.91453  | 0.670862 |
| 480 | 0.641026 | 0.969231 | 0.91453  | 0.670862 |
| 481 | 0.641026 | 0.969231 | 0.91453  | 0.670862 |
| 482 | 0.641026 | 0.969231 | 0.91453  | 0.670862 |
| 483 | 0.641026 | 0.969231 | 0.91453  | 0.670862 |
| 484 | 0.641026 | 0.969231 | 0.91453  | 0.670862 |
| 485 | 0.615385 | 0.969231 | 0.910256 | 0.651695 |
| 486 | 0.615385 | 0.969231 | 0.910256 | 0.651695 |
| 487 | 0.615385 | 0.969231 | 0.910256 | 0.651695 |
| 488 | 0.641026 | 0.969231 | 0.91453  | 0.670862 |
| 489 | 0.641026 | 0.969231 | 0.91453  | 0.670862 |
| 490 | 0.641026 | 0.969231 | 0.91453  | 0.670862 |
| 491 | 0.641026 | 0.964103 | 0.910256 | 0.656366 |
| 492 | 0.641026 | 0.969231 | 0.91453  | 0.670862 |
| 493 | 0.641026 | 0.969231 | 0.91453  | 0.670862 |
| 494 | 0.641026 | 0.969231 | 0.91453  | 0.670862 |
| 495 | 0.641026 | 0.969231 | 0.91453  | 0.670862 |
| 496 | 0.641026 | 0.969231 | 0.91453  | 0.670862 |
| 497 | 0.641026 | 0.969231 | 0.91453  | 0.670862 |
| 498 | 0.641026 | 0.969231 | 0.91453  | 0.670862 |
| 499 | 0.641026 | 0.958974 | 0.905983 | 0.64246  |
| 500 | 0.641026 | 0.958974 | 0.905983 | 0.64246  |
