# Supplementary figures and images for: Gene Ontology and KEGG Enrichment Analyses of Genes Related to Age-Related Macular Degeneration
Source: Hindawi journal article supplement (doi:10.1155/2014/450386), 2014-01-01

Supplementary Material IV. IFS-curve for each dataset

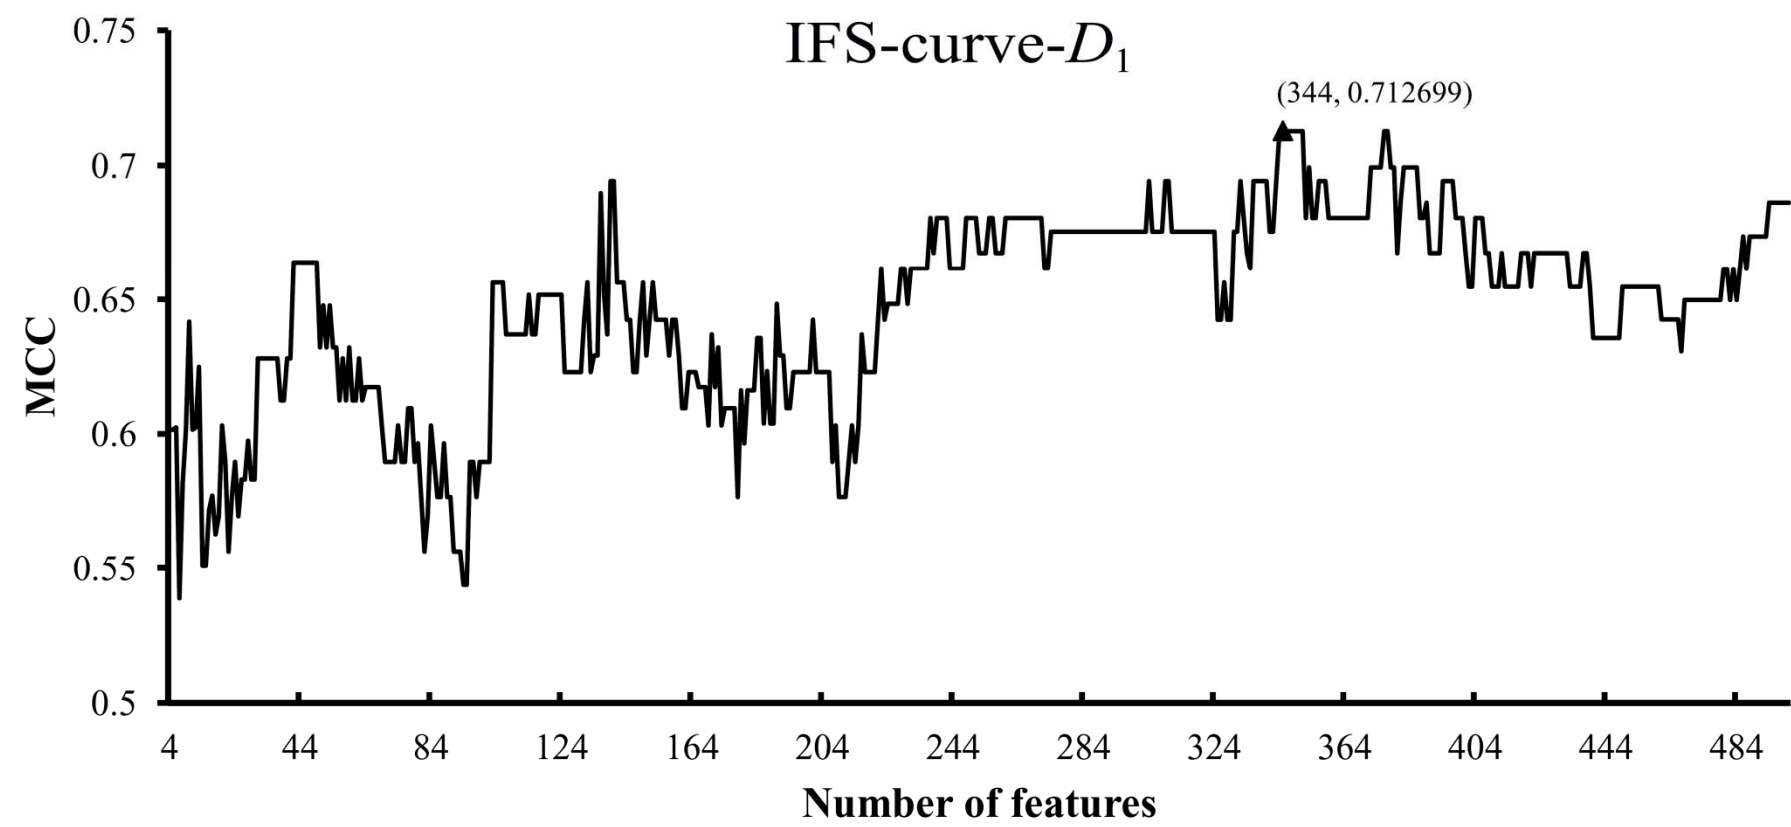

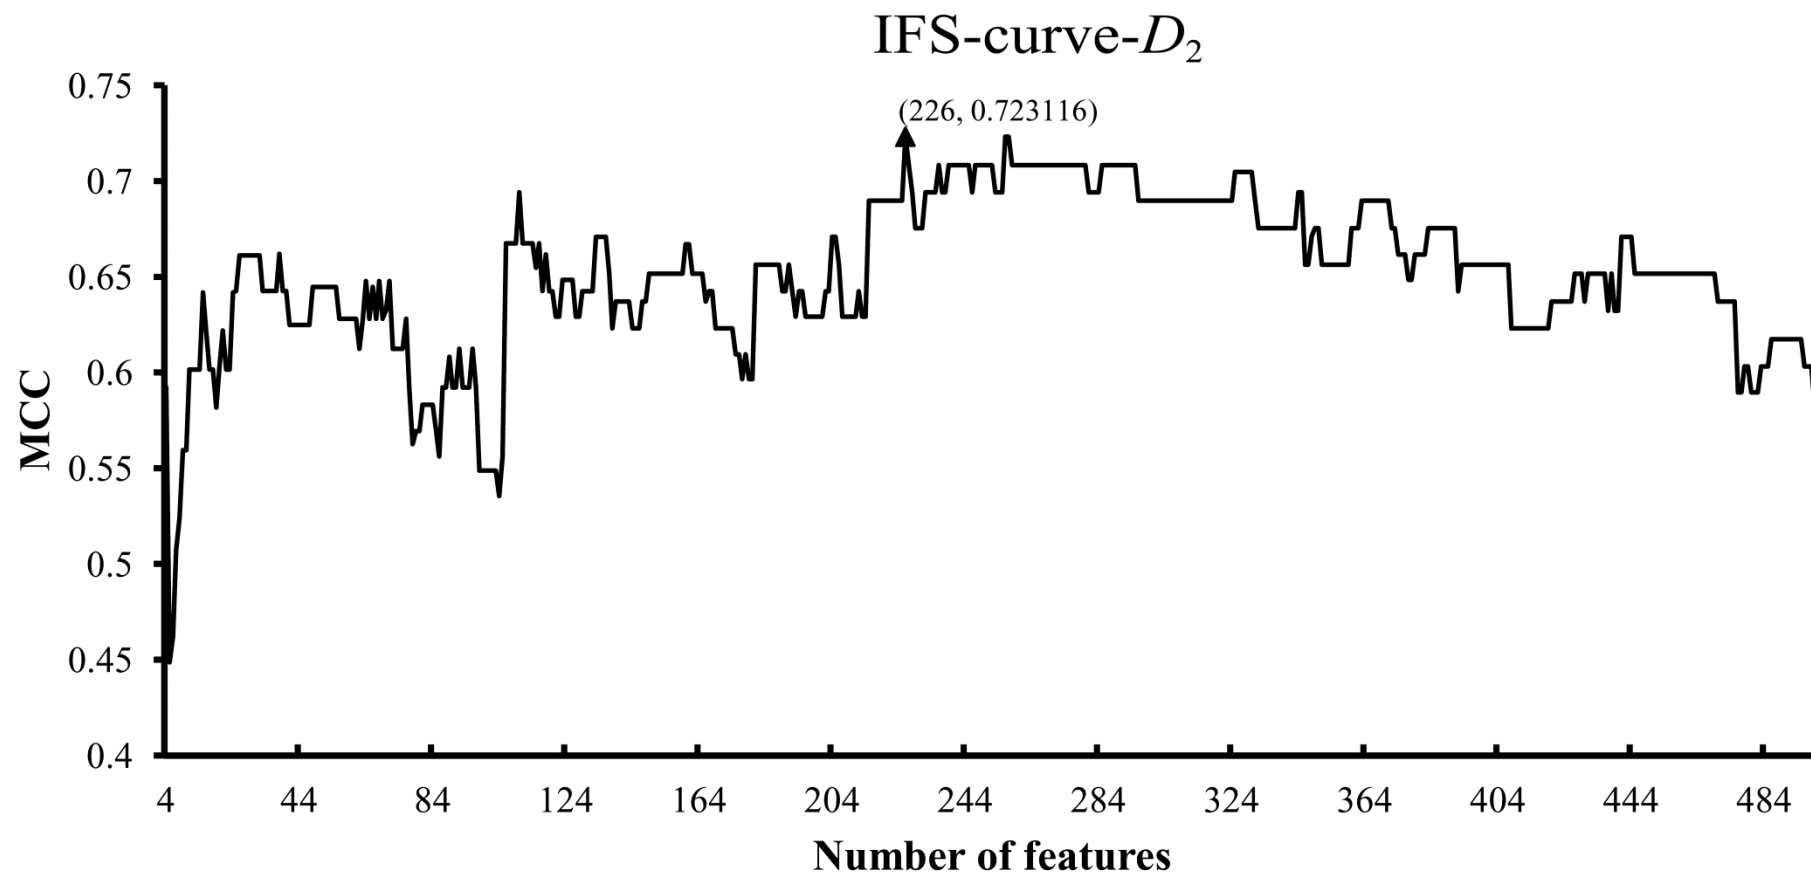

IFS-curve- $D_3$

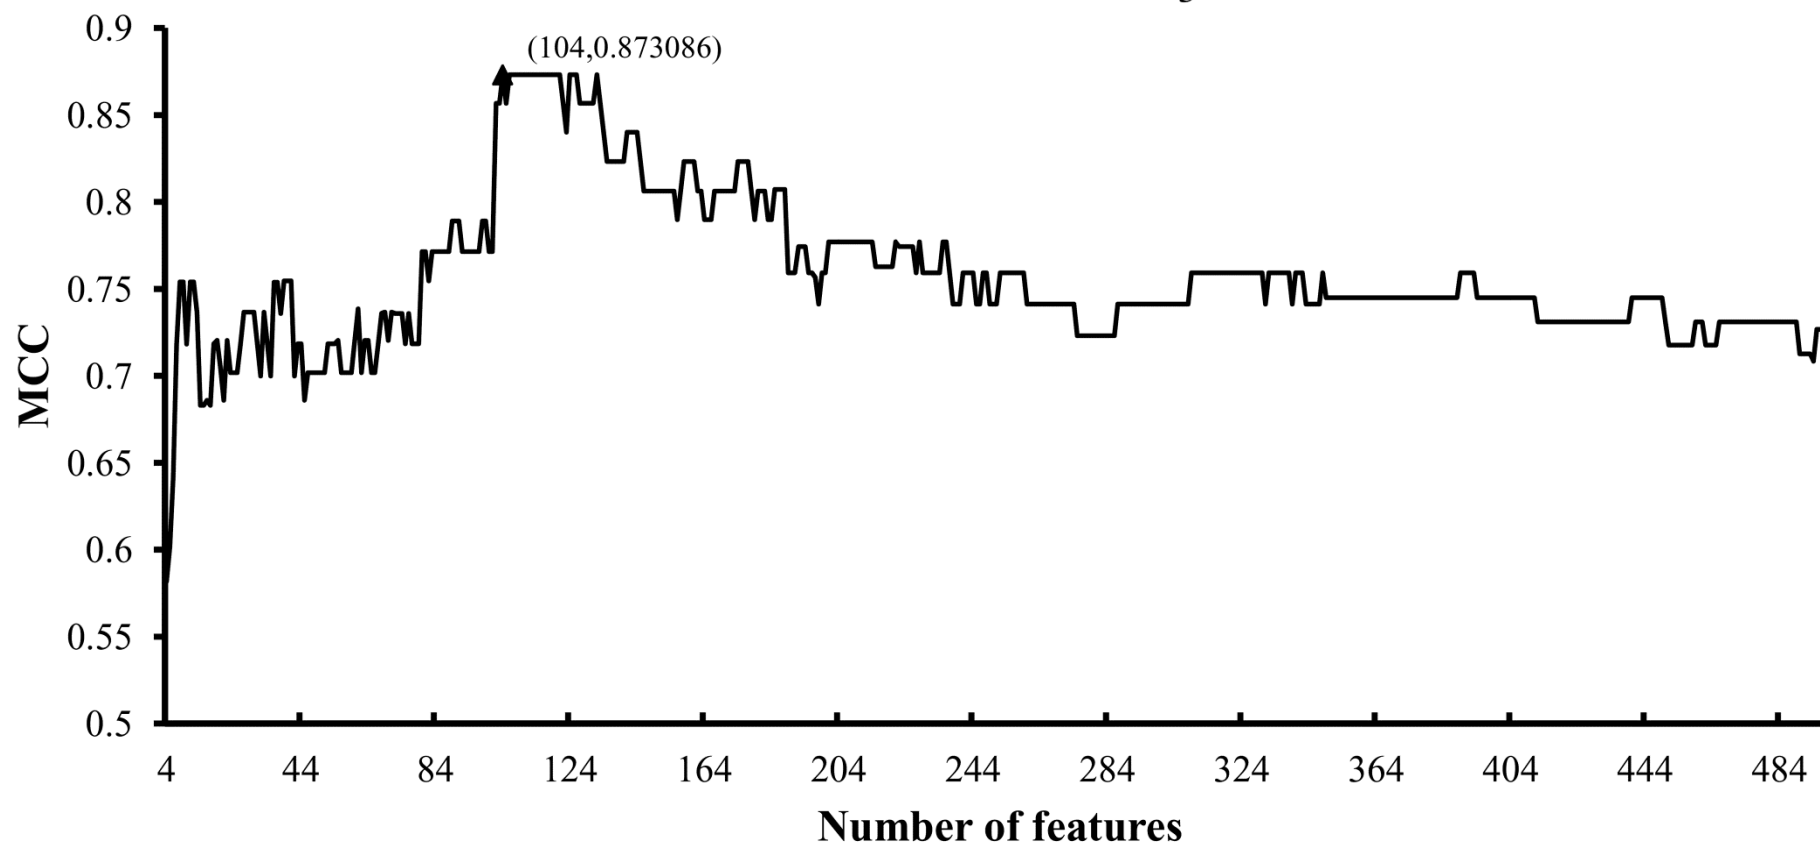

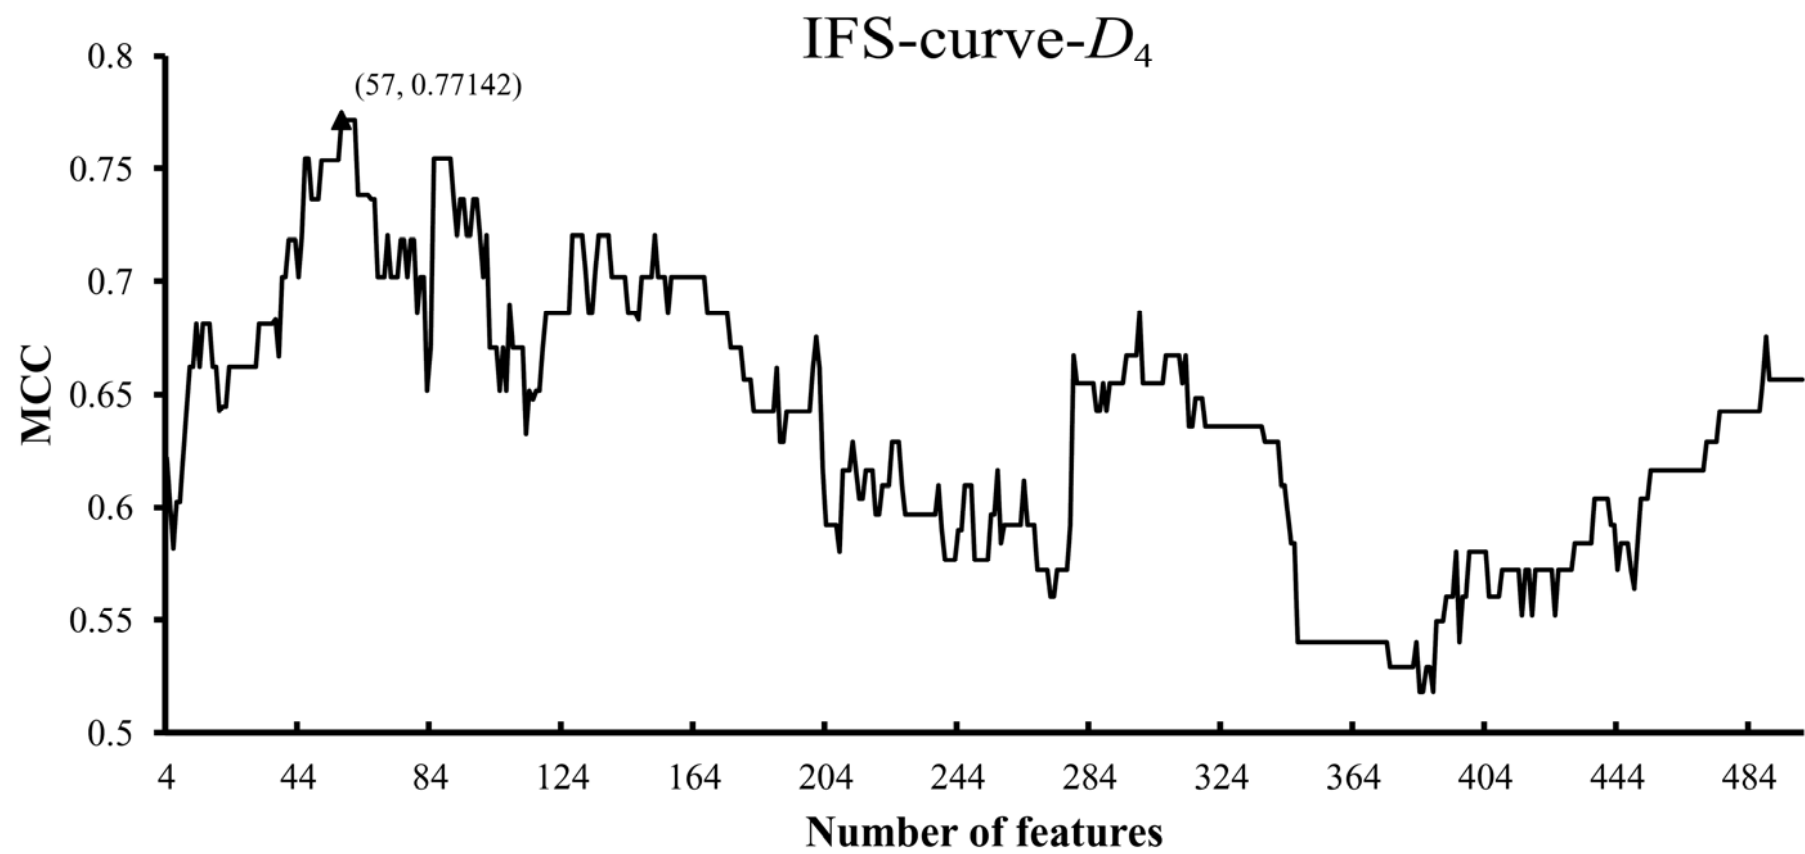

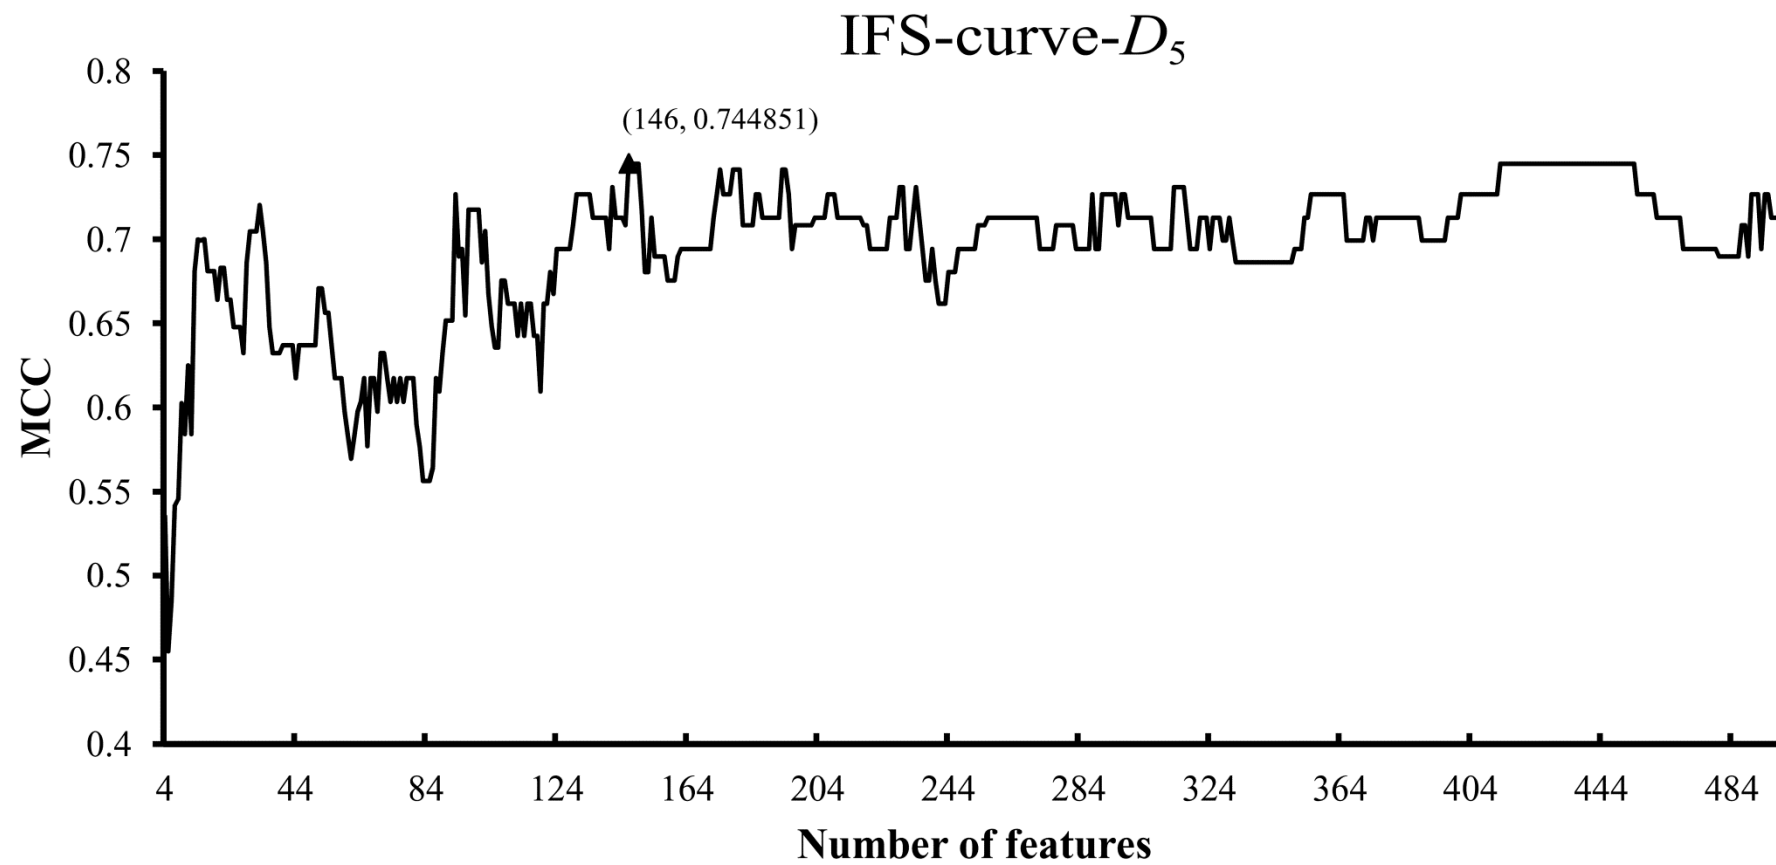

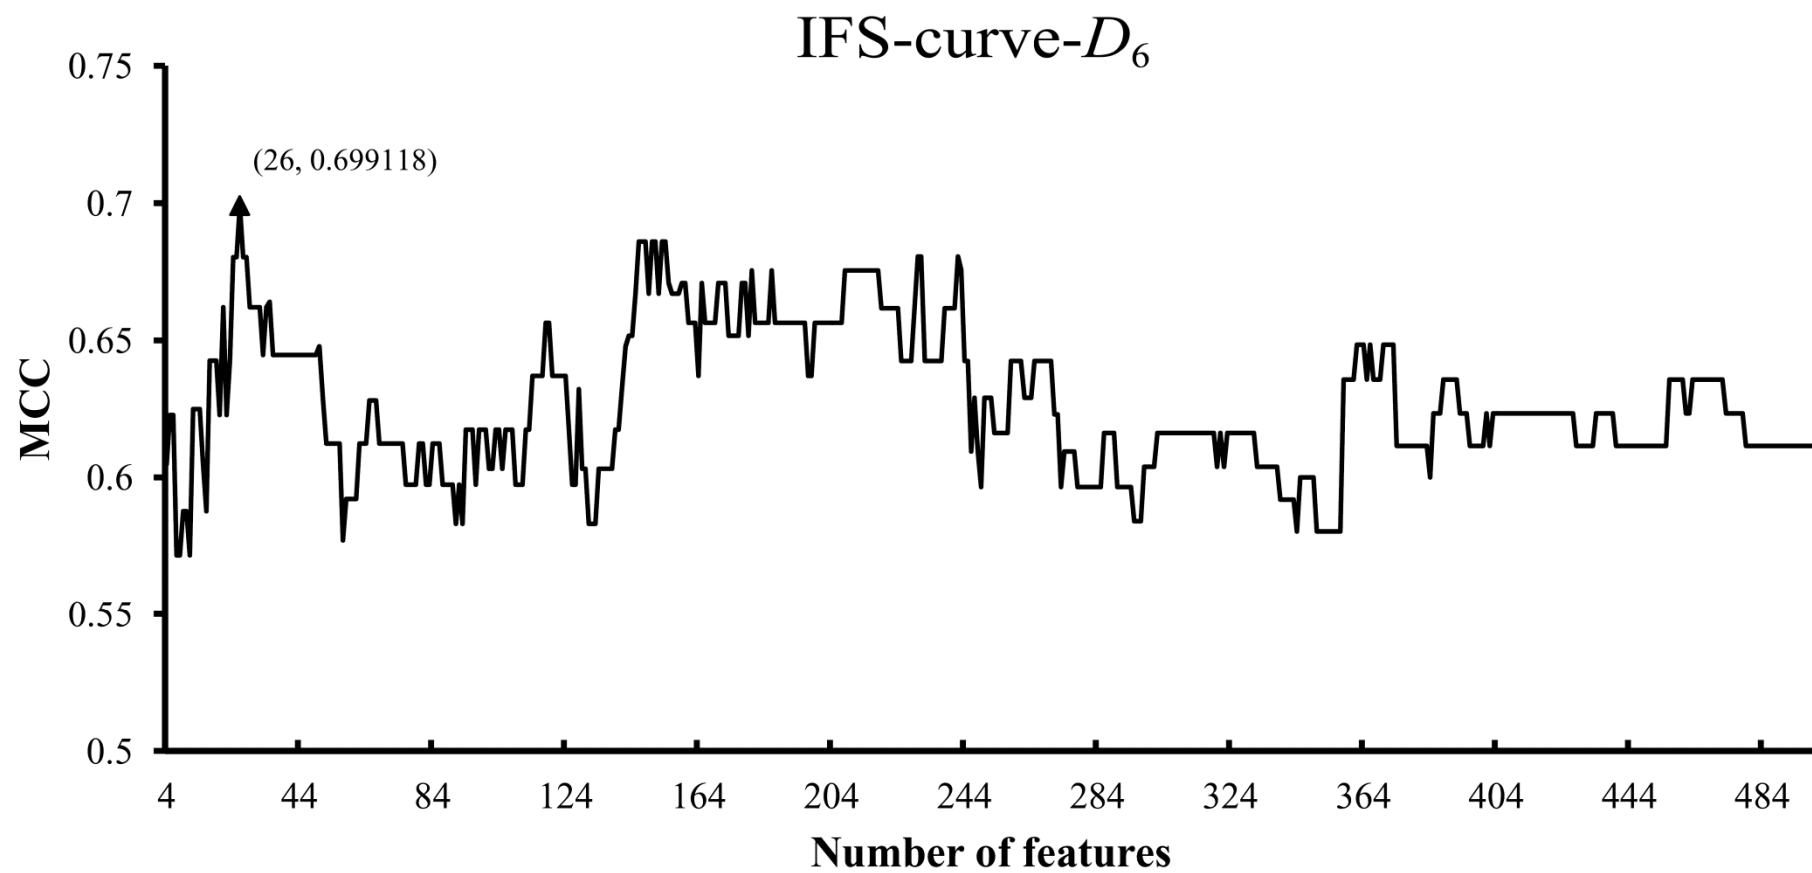

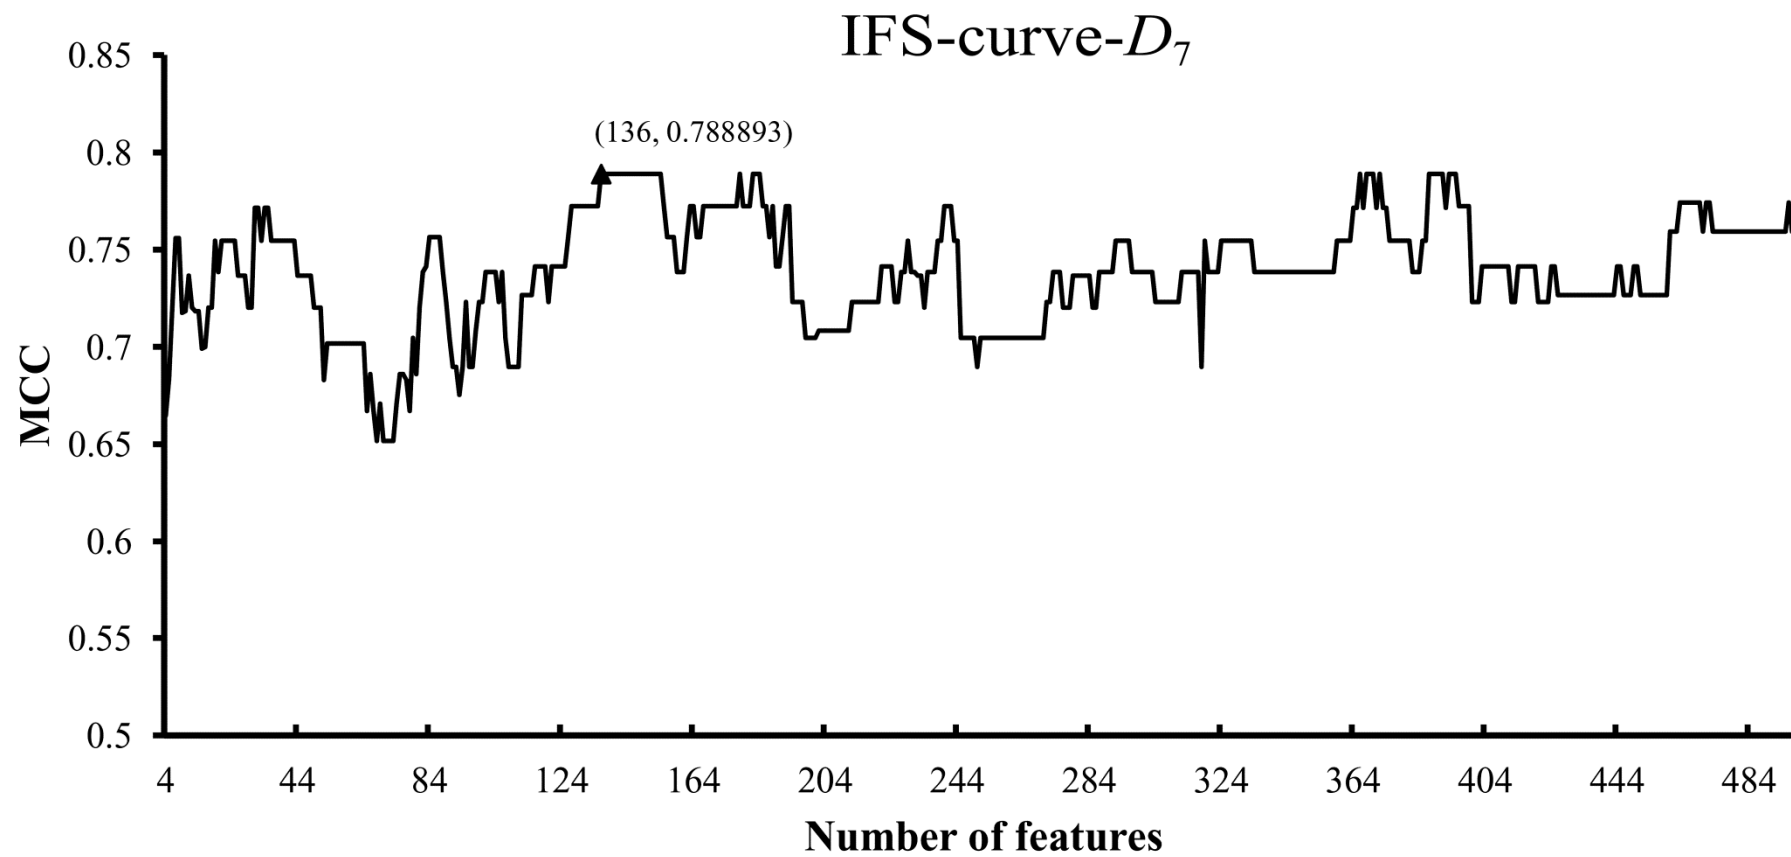

IFS-curve- $D_8$

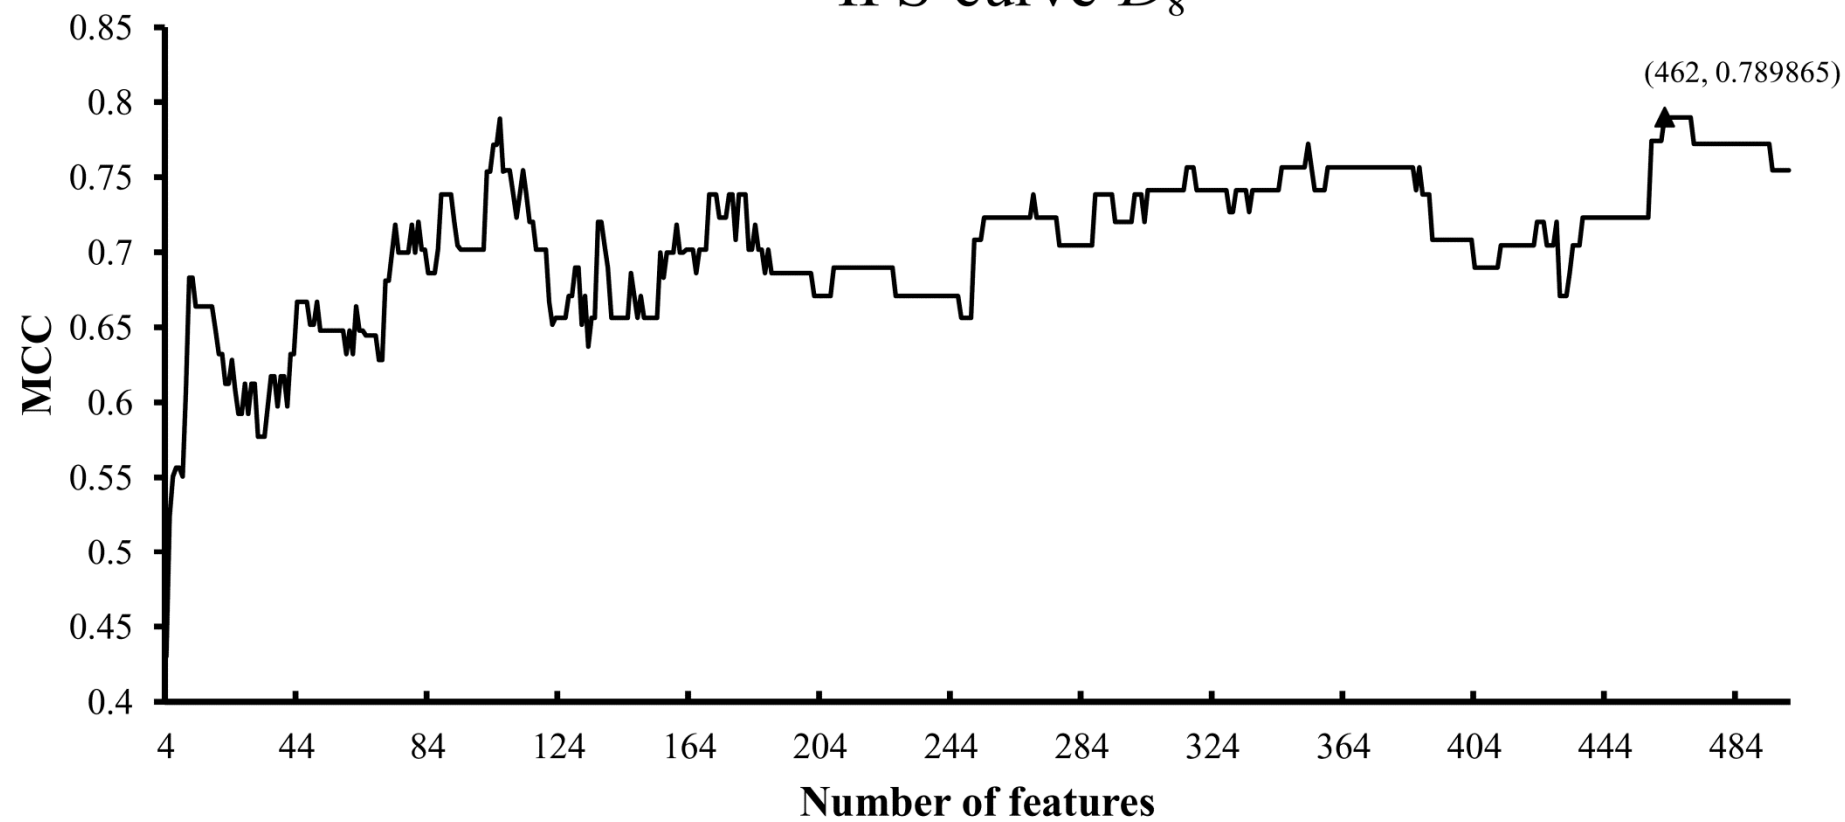



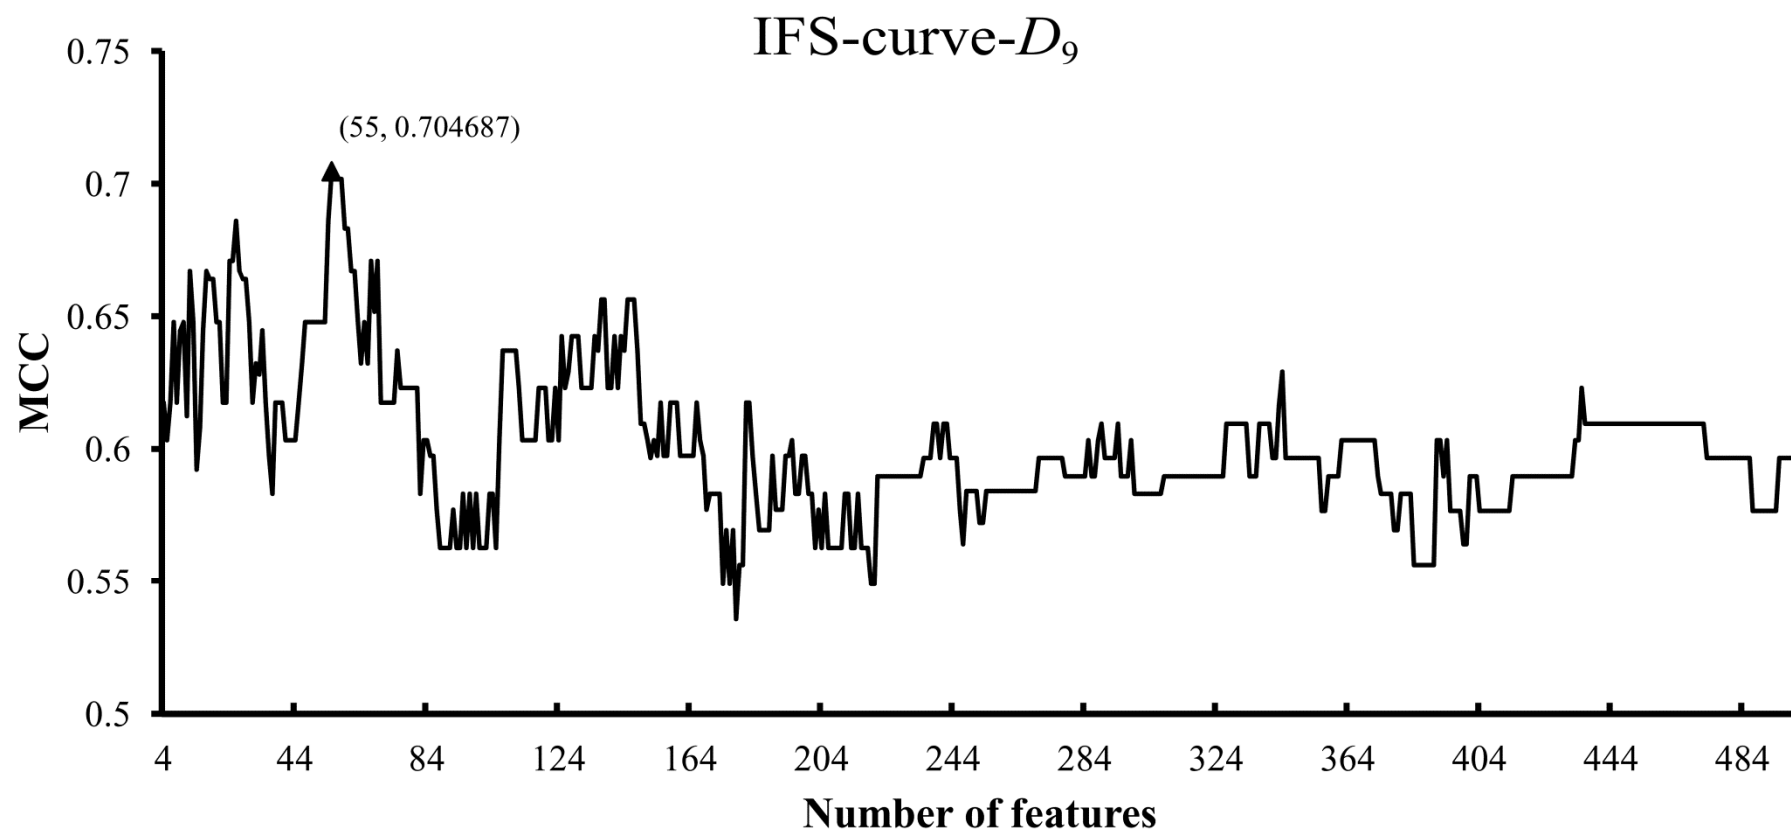

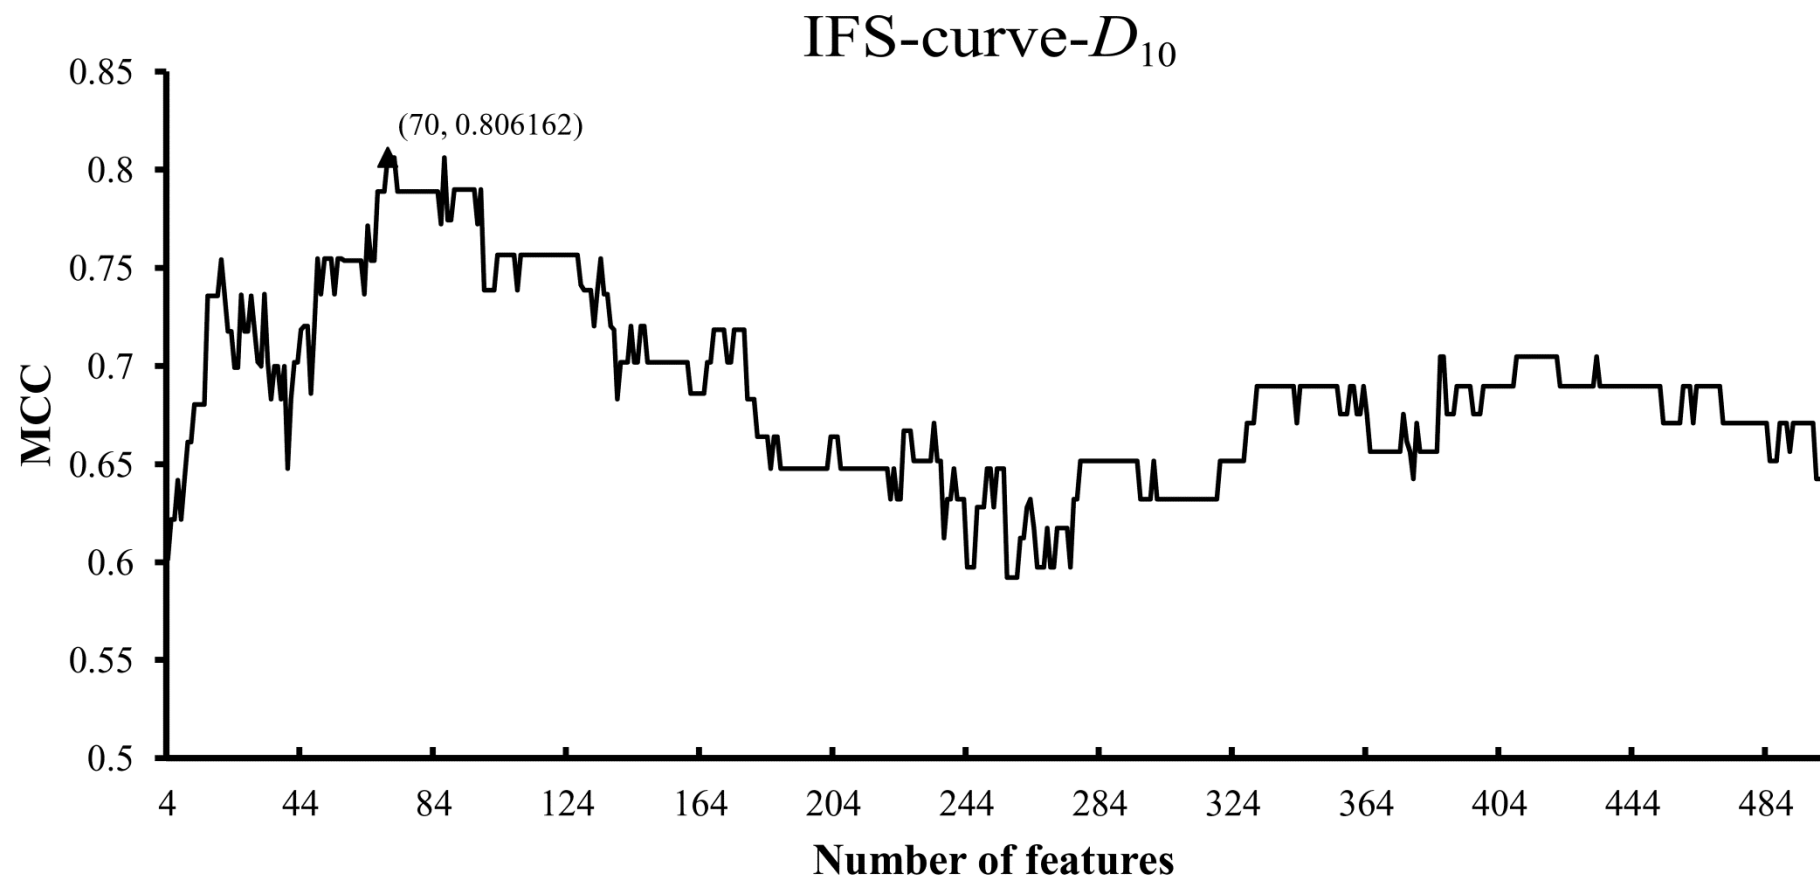

Supplement: f1 [file 450386.f1.zip]
